# Supplementary material
Source: publisher figshare collection journal article supplement (https://acs.figshare.com/ndownloader/files/18028601)
Supplement: Supplementary file 1 [file 18028601]

## Sheet: Sheet2
Supplementary Table S3 Phosphorylated peptide list used for calculation of enrichment ratios
AccNum	ProtDescription	Seq	Mod	ModDetail	ObsMass	ObsMz	CalcMass	CalcMz	DeltaMass	Charge	PeptScore	DeltaScore	Title	RetTime	MissClvg	Identity	FwdSeq	BwdSeq
1433T_HUMAN	14-3-3 protein theta OS=Homo sapiens GN=YWHAQ PE=1 SV=1	DNLTLWTSDSAGEECDAAEGAEN	Carbamidomethyl (C);Phospho (ST)	57.021465@C:15,79.966331@S:10	2533.95	1267.98	2533.94	1267.98	0.0044	2	79.6	25.1	Elution from: 70.169 to 70.169 scan no 6517 cid35.00 polarity:+:MA10:m1s	70.169	0	26	R	-
1433T_HUMAN	14-3-3 protein theta OS=Homo sapiens GN=YWHAQ PE=1 SV=1	DNLTLWTSDSAGEECDAAEGAEN	Carbamidomethyl (C);Phospho (ST)	57.021465@C:15,79.966332@T:7	2533.95	845.656	2533.94	845.655	0.0033	3	59.5	0.1	Elution from: 70.299 to 70.299 scan no 6453 cid35.00 polarity:+:MA10:m1s	70.299	0	26	R	-
1433T_HUMAN	14-3-3 protein theta OS=Homo sapiens GN=YWHAQ PE=1 SV=1	DNLTLWTSDSAGEECDAAEGAEN	Carbamidomethyl (C);Phospho (ST)	57.021465@C:15,79.966331@S:8	2533.95	1267.98	2533.94	1267.98	0.0039	2	34.3	0.2	Elution from: 69.941 to 69.941 scan no 6409 cid35.00 polarity:+:MA10:m1s	69.941	0	25	R	-
1433Z_HUMAN	14-3-3 protein zeta/delta OS=Homo sapiens GN=YWHAZ PE=1 SV=1	DNLTLWTSDTQGDEAEAGEGGEN	Phospho (ST)	79.966332@T:10	2487.96	830.326	2487.96	830.326	0.0016	3	47	7.3	Elution from: 69.123 to 69.123 scan no 6408 cid35.00 polarity:+:MA10:m1s	69.123	0	25	R	-
1A69_HUMAN	HLA class I histocompatibility antigen, A-69 alpha chain OS=Homo sapiens GN=HLA-A PE=1 SV=2	KGGSYSQAASSDSAQGSDVSLTACKV	Carbamidomethyl (C);2 Phospho (ST)	57.021465@C:24,79.966331@S:17,79.966331@S:20	2720.11	907.709	2720.1	907.709	0.0017	3	41.4	5.9	Elution from: 46.020 to 46.020 scan no 4322 cid35.00 polarity:+:MA10:m1s	46.02	2	26	R	-
AAAT_HUMAN	Neutral amino acid transporter B(0) OS=Homo sapiens GN=SLC1A5 PE=1 SV=2	STEPELIQVK	Label:2H(4) (K);Phospho (ST)	4.025107@K:10,79.966332@T:2	1226.61	614.313	1226.61	614.312	0.0012	2	35.7	0	Elution from: 50.778 to 50.778 scan no 4704 cid35.00 polarity:+:MA10	50.778	0	25	R	S
AAK1_HUMAN	AP2-associated protein kinase 1 OS=Homo sapiens GN=AAK1 PE=1 SV=3	VGSLTPPSSPK	Label:2H(4) (K);2 Phospho (ST)	4.025107@K:11,79.966332@T:5,79.966331@S:9	1232.54	617.278	1232.54	617.277	0.0011	2	37.3	0	Elution from: 40.037 to 40.037 scan no 3444 cid35.00 polarity:+:MA10	40.037	0	25	K	T
AATF_HUMAN	Protein AATF OS=Homo sapiens GN=AATF PE=1 SV=1	YLVDGTKPNAGSEEISSEDDELVEEK	3 Phospho (ST)	79.966331@S:12,79.966331@S:16,79.966331@S:17	3092.21	1031.74	3092.21	1031.74	0.0047	3	56.1	26	Elution from: 59.816 to 59.816 scan no 5728 cid35.00 polarity:+:MA10:m1s	59.816	0	26	R	K
AATF_HUMAN	Protein AATF OS=Homo sapiens GN=AATF PE=1 SV=1	YLVDGTKPNAGSEEISSEDDELVEEK	2 Label:2H(4) (K);3 Phospho (ST)	4.025107@K:7,4.025107@K:26,79.966331@S:12,79.966331@S:16,79.966331@S:17	3100.26	1034.43	3100.26	1034.43	0.0036	3	55.9	25.2	Elution from: 60.282 to 60.282 scan no 5610 cid35.00 polarity:+:MA10:m1s	60.282	0	25	R	K
AATF_HUMAN	Protein AATF OS=Homo sapiens GN=AATF PE=1 SV=1	YLVDGTKPNAGSEEISSEDDELVEEK	3 Phospho (ST)	79.966332@T:6,79.966331@S:16,79.966331@S:17	3092.21	1031.74	3092.21	1031.74	0.0039	3	43	1	Elution from: 60.298 to 60.298 scan no 5720 cid35.00 polarity:+:MA10:m1s	60.298	0	25	R	K
AATF_HUMAN	Protein AATF OS=Homo sapiens GN=AATF PE=1 SV=1	YLVDGTKPNAGSEEISSEDDELVEEKK	3 Label:2H(4) (K);3 Phospho (ST)	4.025107@K:7,4.025107@K:26,4.025107@K:27,79.966332@T:6,79.966331@S:16,79.966331@S:17	3232.38	1078.47	3232.38	1078.47	0.0025	3	39.9	0.9	Elution from: 55.342 to 55.342 scan no 5138 cid35.00 polarity:+:MA10:m1s	55.342	1	26	R	Q
AATF_HUMAN	Protein AATF OS=Homo sapiens GN=AATF PE=1 SV=1	YLVDGTKPNAGSEEISSEDDELVEEKK	3 Label:2H(4) (K);3 Phospho (ST)	4.025107@K:7,4.025107@K:26,4.025107@K:27,79.966331@S:12,79.966331@S:16,79.966331@S:17	3232.38	1078.47	3232.38	1078.47	0.0012	3	38.9	6.5	Elution from: 55.515 to 55.515 scan no 5260 cid35.00 polarity:+:MA10:m1s	55.515	1	26	R	Q
AATF_HUMAN	Protein AATF OS=Homo sapiens GN=AATF PE=1 SV=1	YLVDGTKPNAGSEEISSEDDELVEEKK	3 Phospho (ST)	79.966331@S:12,79.966331@S:16,79.966331@S:17	3220.31	1074.44	3220.3	1074.44	0.0047	3	38.3	3.9	Elution from: 55.315 to 55.315 scan no 5165 cid35.00 polarity:+:MA10:m1s	55.315	1	25	R	Q
ABCF1_HUMAN	ATP-binding cassette sub-family F member 1 OS=Homo sapiens GN=ABCF1 PE=1 SV=2	KAEQGSEEEGEGEEEEEEGGESK	2 Label:2H(4) (K);Phospho (ST)	4.025107@K:1,4.025107@K:23,79.966331@S:6	2569	1285.51	2569	1285.5	0.0028	2	102	76.4	Elution from: 30.336 to 30.336 scan no 2133 cid35.00 polarity:+:MA10:m1s	30.336	1	26	K	A
ABCF1_HUMAN	ATP-binding cassette sub-family F member 1 OS=Homo sapiens GN=ABCF1 PE=1 SV=2	GGNVFAALIQDQSEEEEEEEK	Label:2H(4) (K);Phospho (ST)	4.025107@K:21,79.966331@S:13	2434.04	1218.03	2434.04	1218.03	0.0034	2	95.3	84.2	Elution from: 72.630 to 72.630 scan no 6702 cid35.00 polarity:+:MA10:m1s	72.63	0	25	K	H
ABCF1_HUMAN	ATP-binding cassette sub-family F member 1 OS=Homo sapiens GN=ABCF1 PE=1 SV=2	KAEQGSEEEGEGEEEEEEGGESK	Phospho (ST)	79.966331@S:6	2560.95	1281.48	2560.94	1281.48	0.0036	2	92.7	82.6	Elution from: 30.202 to 30.202 scan no 2240 cid35.00 polarity:+:MA10:m1s	30.202	1	26	K	A
ABCF1_HUMAN	ATP-binding cassette sub-family F member 1 OS=Homo sapiens GN=ABCF1 PE=1 SV=2	KLSVPTSDEEDEVPAPKPR	Label:13C(6)15N(4) (R);2 Label:2H(4) (K);2 Phospho (ST)	10.008269@R:19,4.025107@K:1,4.025107@K:17,79.966332@T:6,79.966331@S:7	2271.06	758.027	2271.06	758.026	0.0025	3	80.9	10.4	Elution from: 46.581 to 46.581 scan no 4274 cid35.00 polarity:+:MA10:m1s	46.581	1	25	K	G
ABCF1_HUMAN	ATP-binding cassette sub-family F member 1 OS=Homo sapiens GN=ABCF1 PE=1 SV=2	KAEQGSEEEGEGEEEEEEGGESKADDPYAHLSK	Phospho (ST)	79.966331@S:6	3658.46	915.623	3658.46	915.622	0.0034	4	80.8	46.5	Elution from: 41.050 to 41.050 scan no 3573 cid35.00 polarity:+:MA10:m1s	41.05	2	25	K	K
ABCF1_HUMAN	ATP-binding cassette sub-family F member 1 OS=Homo sapiens GN=ABCF1 PE=1 SV=2	GGNVFAALIQDQSEEEEEEEK	Phospho (ST)	79.966331@S:13	2430.01	1216.01	2430.01	1216.01	0.0024	2	80.2	73.6	Elution from: 71.925 to 71.925 scan no 6647 cid35.00 polarity:+:MA10:m1s	71.925	0	26	K	H
ABCF1_HUMAN	ATP-binding cassette sub-family F member 1 OS=Homo sapiens GN=ABCF1 PE=1 SV=2	KLSVPTSDEEDEVPAPKPR	2 Phospho (ST)	79.966332@T:6,79.966331@S:7	2253	752.007	2253	752.006	0.0026	3	69.8	26.9	Elution from: 46.616 to 46.616 scan no 4231 cid35.00 polarity:+:MA10:m1s	46.616	1	25	K	G
ABCF1_HUMAN	ATP-binding cassette sub-family F member 1 OS=Homo sapiens GN=ABCF1 PE=1 SV=2	LSVPTSDEEDEVPAPKPR	Label:13C(6)15N(4) (R);Label:2H(4) (K);2 Phospho (ST)	10.008269@R:18,4.025107@K:16,79.966332@T:5,79.966331@S:6	2138.94	713.986	2138.94	713.986	0.0024	3	60.9	26.6	Elution from: 49.628 to 49.628 scan no 4573 cid35.00 polarity:+:MA10:m1s	49.628	0	26	K	G
ABCF1_HUMAN	ATP-binding cassette sub-family F member 1 OS=Homo sapiens GN=ABCF1 PE=1 SV=2	KLSVPTSDEEDEVPAPKPR	Phospho (ST)	79.966331@S:7	2173.03	725.351	2173.03	725.351	0.0023	3	57.8	0	Elution from: 44.380 to 44.380 scan no 4151 cid35.00 polarity:+:MA10:m1s	44.38	1	26	K	G
ABCF1_HUMAN	ATP-binding cassette sub-family F member 1 OS=Homo sapiens GN=ABCF1 PE=1 SV=2	QQPPEPEWIGDGESTSPSDK	Phospho (ST)	79.966331@S:16	2262.93	755.319	2262.93	755.318	0.0027	3	56.9	6.4	Elution from: 54.515 to 54.515 scan no 5237 cid35.00 polarity:+:MA10:m1s	54.515	0	26	K	V
ABCF1_HUMAN	ATP-binding cassette sub-family F member 1 OS=Homo sapiens GN=ABCF1 PE=1 SV=2	LSVPTSDEEDEVPAPKPR	2 Phospho (ST)	79.966332@T:5,79.966331@S:6	2124.9	709.308	2124.9	709.308	0.0012	3	52.7	18.7	Elution from: 49.553 to 49.553 scan no 4745 cid35.00 polarity:+:MA10:m1s	49.553	0	26	K	G
ABCF1_HUMAN	ATP-binding cassette sub-family F member 1 OS=Homo sapiens GN=ABCF1 PE=1 SV=2	KLSVPTSDEEDEVPAPKPR	Label:13C(6)15N(4) (R);2 Label:2H(4) (K);3 Phospho (ST)	10.008269@R:19,4.025107@K:1,4.025107@K:17,79.966331@S:3,79.966332@T:6,79.966331@S:7	2351.02	784.682	2351.02	784.681	0.002	3	51.7	40.6	Elution from: 48.360 to 48.360 scan no 4468 cid35.00 polarity:+:MA10:m1s	48.36	1	25	K	G
ABCF1_HUMAN	ATP-binding cassette sub-family F member 1 OS=Homo sapiens GN=ABCF1 PE=1 SV=2	QQPPEPEWIGDGESTSPSDK	Phospho (ST)	79.966331@S:18	2262.93	1132.47	2262.93	1132.47	0.0015	2	50.5	0.9	Elution from: 54.557 to 54.557 scan no 5242 cid35.00 polarity:+:MA10:m1s	54.557	0	26	K	V
ABCF1_HUMAN	ATP-binding cassette sub-family F member 1 OS=Homo sapiens GN=ABCF1 PE=1 SV=2	LSVPTSDEEDEVPAPKPR	Label:13C(6)15N(4) (R);Label:2H(4) (K);Phospho (ST)	10.008269@R:18,4.025107@K:16,79.966331@S:6	2058.97	687.33	2058.97	687.33	-0.0007	3	45	8.6	Elution from: 47.585 to 47.585 scan no 4345 cid35.00 polarity:+:MA10:m1s	47.585	0	26	K	G
ABCF1_HUMAN	ATP-binding cassette sub-family F member 1 OS=Homo sapiens GN=ABCF1 PE=1 SV=2	KLSVPTSDEEDEVPAPKPR	3 Phospho (ST)	79.966331@S:3,79.966332@T:6,79.966331@S:7	2332.97	778.662	2332.96	778.662	0.0021	3	42.5	33.7	Elution from: 48.242 to 48.242 scan no 4550 cid35.00 polarity:+:MA10:m1s	48.242	1	26	K	G
ABCF1_HUMAN	ATP-binding cassette sub-family F member 1 OS=Homo sapiens GN=ABCF1 PE=1 SV=2	LSVPTSDEEDEVPAPKPR	Label:13C(6)15N(4) (R);Label:2H(4) (K);2 Phospho (ST)	10.008269@R:18,4.025107@K:16,79.966331@S:2,79.966331@S:6	2138.94	1070.48	2138.94	1070.47	0.0005	2	27.5	1.8	Elution from: 49.779 to 49.779 scan no 4594 cid35.00 polarity:+:MA10:m1s	49.779	0	25	K	G
ABLM1_HUMAN	Actin-binding LIM protein 1 OS=Homo sapiens GN=ABLIM1 PE=1 SV=3	TLSPTPSAEGYQDVR	Label:13C(6)15N(4) (R);Phospho (ST)	10.008269@R:15,79.966331@S:3	1709.75	855.885	1709.75	855.884	0.0008	2	62.3	5.9	Elution from: 45.995 to 45.995 scan no 4259 cid35.00 polarity:+:MA10:m1s	45.995	0	25	R	D
ABLM1_HUMAN	Actin-binding LIM protein 1 OS=Homo sapiens GN=ABLIM1 PE=1 SV=3	TASLPGYGR	Phospho (ST)	79.966331@S:3	1000.44	501.227	1000.44	501.226	0.0018	2	47	16.7	Elution from: 40.756 to 40.756 scan no 3554 cid35.00 polarity:+:MA10:m1s	40.756	0	26	K	N
ABLM1_HUMAN	Actin-binding LIM protein 1 OS=Homo sapiens GN=ABLIM1 PE=1 SV=3	TASLPGYGR	Label:13C(6)15N(4) (R);Phospho (ST)	10.008269@R:9,79.966331@S:3	1010.45	506.23	1010.45	506.23	-0.0001	2	24.1	9.9	Elution from: 40.724 to 40.724 scan no 3576 cid35.00 polarity:+:MA10	40.724	0	26	K	N
ACACA_HUMAN	Acetyl-CoA carboxylase 1 OS=Homo sapiens GN=ACACA PE=1 SV=2	SSMSGLHLVK	Label:2H(4) (K);Oxidation (M);Phospho (ST)	4.025107@K:10,15.994915@M:3,79.966331@S:4	1157.55	579.78	1157.55	579.78	-0.0002	2	29.8	5.9	Elution from: 37.535 to 37.535 scan no 3116 cid35.00 polarity:+:MA10	37.535	0	25	R	Q
ACACA_HUMAN	Acetyl-CoA carboxylase 1 OS=Homo sapiens GN=ACACA PE=1 SV=2	ASEGGGGKGIR	Label:13C(6)15N(4) (R);Phospho (ST)	10.008269@R:11,79.966331@S:2	1077.48	360.168	1077.48	360.169	-0.0027	3	25	9.3	Elution from: 38.595 to 38.595 scan no 3309 cid35.00 polarity:+:MA10:m1s	38.595	1	25	K	K
ACINU_HUMAN	Apoptotic chromatin condensation inducer in the nucleus OS=Homo sapiens GN=ACIN1 PE=1 SV=2	SSSISEEKGDSDDEKPR	Phospho (ST)	79.966331@S:11	1944.8	973.406	1944.79	973.405	0.002	2	68.8	14.2	Elution from: 26.293 to 26.293 scan no 1663 cid35.00 polarity:+:MA10	26.293	1	25	K	K
ACINU_HUMAN	Apoptotic chromatin condensation inducer in the nucleus OS=Homo sapiens GN=ACIN1 PE=1 SV=2	SSSISEEKGDSDDEKPR	Label:13C(6)15N(4) (R);2 Label:2H(4) (K);Phospho (ST)	10.008269@R:17,4.025107@K:8,4.025107@K:15,79.966331@S:11	1962.85	655.292	1962.85	655.292	0.0008	3	68.5	43.4	Elution from: 26.047 to 26.047 scan no 1665 cid35.00 polarity:+:MA10	26.047	1	26	K	K
ACINU_HUMAN	Apoptotic chromatin condensation inducer in the nucleus OS=Homo sapiens GN=ACIN1 PE=1 SV=2	TAQVPSPPR	Phospho (ST)	79.966331@S:6	1031.48	516.747	1031.48	516.747	0.0003	2	48.4	32.1	Elution from: 36.813 to 36.813 scan no 3158 cid35.00 polarity:+:MA10	36.813	0	25	R	G
ACINU_HUMAN	Apoptotic chromatin condensation inducer in the nucleus OS=Homo sapiens GN=ACIN1 PE=1 SV=2	AESPAEKVPEESVLPLVQK	Phospho (ST)	79.966331@S:3	2129.06	710.695	2129.07	710.696	-0.0016	3	44.2	15.6	Elution from: 58.678 to 58.678 scan no 5466 cid35.00 polarity:+:MA10:m1s	58.678	1	25	K	S
ACINU_HUMAN	Apoptotic chromatin condensation inducer in the nucleus OS=Homo sapiens GN=ACIN1 PE=1 SV=2	TAQVPSPPR	Label:13C(6)15N(4) (R);Phospho (ST)	10.008269@R:9,79.966331@S:6	1041.49	521.751	1041.49	521.751	0	2	34.8	27.8	Elution from: 36.597 to 36.597 scan no 2987 cid35.00 polarity:+:MA10	36.597	0	26	R	G
ACINU_HUMAN	Apoptotic chromatin condensation inducer in the nucleus OS=Homo sapiens GN=ACIN1 PE=1 SV=2	TAQVPSPPRGK	Phospho (ST)	79.966331@S:6	1216.6	609.306	1216.6	609.306	0.0004	2	34.7	20.9	Elution from: 32.269 to 32.269 scan no 2431 cid35.00 polarity:+:MA10	32.269	1	25	R	I
ACINU_HUMAN	Apoptotic chromatin condensation inducer in the nucleus OS=Homo sapiens GN=ACIN1 PE=1 SV=2	ASLVALPEQTASEEETPPPLLTK	Label:2H(4) (K);2 Phospho (ST)	4.025107@K:23,79.966331@S:12,79.966332@T:16	2584.23	862.417	2584.23	862.416	0.0038	3	34.2	1.3	Elution from: 72.408 to 72.408 scan no 6699 cid35.00 polarity:+:MA10:m1s	72.408	0	26	K	E
ACINU_HUMAN	Apoptotic chromatin condensation inducer in the nucleus OS=Homo sapiens GN=ACIN1 PE=1 SV=2	SKSPSPPRLTEDR	2 Label:13C(6)15N(4) (R);Label:2H(4) (K);2 Phospho (ST)	10.008269@R:8,10.008269@R:13,4.025107@K:2,79.966331@S:3,79.966331@S:5	1652.74	551.92	1652.74	551.92	0.001	3	29.5	7.8	Elution from: 34.590 to 34.590 scan no 2820 cid35.00 polarity:+:MA10	34.59	2	26	K	K
ACINU_HUMAN	Apoptotic chromatin condensation inducer in the nucleus OS=Homo sapiens GN=ACIN1 PE=1 SV=2	TAQVPSPPRGK	Label:13C(6)15N(4) (R);Label:2H(4) (K);Phospho (ST)	10.008269@R:9,4.025107@K:11,79.966331@S:6	1230.63	411.217	1230.63	411.217	0.0001	3	27.1	20.9	Elution from: 31.472 to 31.472 scan no 2283 cid35.00 polarity:+:MA10	31.472	1	26	R	I
ACINU_HUMAN	Apoptotic chromatin condensation inducer in the nucleus OS=Homo sapiens GN=ACIN1 PE=1 SV=2	SKSPSPPRLTEDR	2 Label:13C(6)15N(4) (R);Label:2H(4) (K);2 Phospho (ST)	10.008269@R:8,10.008269@R:13,4.025107@K:2,79.966331@S:5,79.966332@T:10	1652.74	551.92	1652.74	551.92	0.0007	3	26.6	5.6	Elution from: 35.392 to 35.392 scan no 2948 cid35.00 polarity:+:MA10	35.392	2	25	K	K
ACLY_HUMAN	ATP-citrate synthase OS=Homo sapiens GN=ACLY PE=1 SV=3	TASFSESRADEVAPAKK	Phospho (ST)	79.966331@S:3	1872.86	625.295	1872.86	625.295	0.0025	3	50.7	11.1	Elution from: 35.212 to 35.212 scan no 2791 cid35.00 polarity:+:MA10	35.212	2	26	R	A
ACLY_HUMAN	ATP-citrate synthase OS=Homo sapiens GN=ACLY PE=1 SV=3	TASFSESRADEVAPAK	Phospho (ST)	79.966331@S:3	1744.77	873.391	1744.77	873.391	0.0008	2	48.6	4.9	Elution from: 38.965 to 38.965 scan no 3341 cid35.00 polarity:+:MA10	38.965	1	26	R	K
ACLY_HUMAN	ATP-citrate synthase OS=Homo sapiens GN=ACLY PE=1 SV=3	TASFSESRADEVAPAK	Label:13C(6)15N(4) (R);Label:2H(4) (K);Phospho (ST)	10.008269@R:8,4.025107@K:16,79.966331@S:3	1758.8	587.274	1758.8	587.274	0.0012	3	28	12.3	Elution from: 38.954 to 38.954 scan no 3305 cid35.00 polarity:+:MA10	38.954	1	25	R	K
ACOD_HUMAN	Acyl-CoA desaturase OS=Homo sapiens GN=SCD PE=1 SV=2	EKGSTLDLSDLEAEK	2 Label:2H(4) (K);Phospho (ST)	4.025107@K:2,4.025107@K:15,79.966332@T:5	1721.82	574.948	1721.82	574.948	0.0006	3	45.5	6.9	Elution from: 56.263 to 56.263 scan no 5323 cid35.00 polarity:+:MA10	56.263	1	25	K	L
ACSA_HUMAN	Acetyl-coenzyme A synthetase, cytoplasmic OS=Homo sapiens GN=ACSS2 PE=1 SV=1	SWSPPPEVSR	Phospho (ST)	79.966331@S:3	1220.52	611.269	1220.52	611.269	0.0006	2	49.2	13.5	Elution from: 48.999 to 48.999 scan no 4546 cid35.00 polarity:+:MA10	48.999	0	26	R	S
ACSA_HUMAN	Acetyl-coenzyme A synthetase, cytoplasmic OS=Homo sapiens GN=ACSS2 PE=1 SV=1	SWSPPPEVSR	Label:13C(6)15N(4) (R);Phospho (ST)	10.008269@R:10,79.966331@S:3	1230.53	616.273	1230.53	616.273	0.0005	2	37	16.4	Elution from: 49.163 to 49.163 scan no 4633 cid35.00 polarity:+:MA10	49.163	0	25	R	S
ADDA_HUMAN	Alpha-adducin OS=Homo sapiens GN=ADD1 PE=1 SV=2	SRSPGSPVGEGTGSPPK	Label:13C(6)15N(4) (R);Label:2H(4) (K);Phospho (ST)	10.008269@R:2,4.025107@K:17,79.966331@S:6	1689.79	564.27	1689.79	564.271	-0.0015	3	46.5	6.2	Elution from: 29.123 to 29.123 scan no 1966 cid35.00 polarity:+:MA10	29.123	1	26	K	W
ADDG_HUMAN	Gamma-adducin OS=Homo sapiens GN=ADD3 PE=1 SV=1	IEEVLSPEGSPSKSPSK	3 Phospho (ST)	79.966331@S:6,79.966331@S:10,79.966331@S:14	2009.8	670.942	2009.8	670.942	0.0008	3	35.5	0	Elution from: 44.577 to 44.577 scan no 4070 cid35.00 polarity:+:MA10	44.577	1	25	K	K
ADDG_HUMAN	Gamma-adducin OS=Homo sapiens GN=ADD3 PE=1 SV=1	IEEVLSPEGSPSKSPSK	2 Label:2H(4) (K);2 Phospho (ST)	4.025107@K:13,4.025107@K:17,79.966331@S:12,79.966331@S:14	1937.89	646.971	1937.89	646.97	0.0021	3	35.4	0	Elution from: 43.573 to 43.573 scan no 3918 cid35.00 polarity:+:MA10	43.573	1	26	K	K
ADDG_HUMAN	Gamma-adducin OS=Homo sapiens GN=ADD3 PE=1 SV=1	IEEVLSPEGSPSKSPSK	2 Label:2H(4) (K);Phospho (ST)	4.025107@K:13,4.025107@K:17,79.966331@S:12	1857.92	620.314	1857.92	620.314	-0.0015	3	30.3	0.4	Elution from: 40.355 to 40.355 scan no 3525 cid35.00 polarity:+:MA10:m1s	40.355	1	26	K	K
ADGB_HUMAN	Androglobin OS=Homo sapiens GN=ADGB PE=2 SV=3	INSAHGSDKSK	Phospho (ST)	79.966331@S:3	1222.54	408.52	1222.53	408.519	0.0036	3	34.1	17.8	Elution from: 24.904 to 24.904 scan no 1478 cid35.00 polarity:+:MA10	24.904	1	26	R	D
ADNP_HUMAN	Activity-dependent neuroprotector homeobox protein OS=Homo sapiens GN=ADNP PE=1 SV=1	LMHNASDSEVDQDDVVEWK	Label:2H(4) (K);Oxidation (M);2 Phospho (ST)	4.025107@K:19,15.994915@M:2,79.966331@S:6,79.966331@S:8	2395.92	799.648	2395.92	799.648	0.0008	3	32.4	27.4	Elution from: 55.533 to 55.533 scan no 5210 cid35.00 polarity:+:MA10:m1s	55.533	0	26	K	D
AF9_HUMAN	Protein AF-9 OS=Homo sapiens GN=MLLT3 PE=1 SV=2	TNNNQILEVKSPIK	Phospho (ST)	79.966331@S:11	1676.85	559.957	1676.85	559.957	-0.0003	3	40.4	31.8	Elution from: 44.862 to 44.862 scan no 4205 cid35.00 polarity:+:MA10	44.862	1	26	K	Q
AFAD_HUMAN	Afadin OS=Homo sapiens GN=MLLT4 PE=1 SV=3	ADHRSSPNVANQPPSPGGK	Label:13C(6)15N(4) (R);Label:2H(4) (K);2 Phospho (ST)	10.008269@R:4,4.025107@K:19,79.966331@S:6,79.966331@S:15	2088.89	697.306	2088.9	697.306	-0.0005	3	31.7	0	Elution from: 28.410 to 28.410 scan no 1884 cid35.00 polarity:+:MA10:m1s	28.41	1	25	R	S
AFAP1_HUMAN	Actin filament-associated protein 1 OS=Homo sapiens GN=AFAP1 PE=1 SV=2	KKPSTDEQTSSAEEDVPTCGYLNVLSNSR	Carbamidomethyl (C);2 Phospho (ST)	57.021465@C:19,79.966332@T:9,79.966331@S:10	3371.43	1124.82	3371.43	1124.82	0.0036	3	72.3	1	Elution from: 61.783 to 61.783 scan no 5895 cid35.00 polarity:+:MA10:m1s	61.783	1	26	K	W
AFAP1_HUMAN	Actin filament-associated protein 1 OS=Homo sapiens GN=AFAP1 PE=1 SV=2	KKPSTDEQTSSAEEDVPTCGYLNVLSNSR	Carbamidomethyl (C);2 Phospho (ST)	57.021465@C:19,79.966332@T:5,79.966332@T:9	3371.43	1124.82	3371.43	1124.82	0.0031	3	70.1	0.2	Elution from: 61.917 to 61.917 scan no 5823 cid35.00 polarity:+:MA10:m1s	61.917	1	26	K	W
AFAP1_HUMAN	Actin filament-associated protein 1 OS=Homo sapiens GN=AFAP1 PE=1 SV=2	KLSSERPSSDGEGVVENGITTCNGK	Carbamidomethyl (C);2 Phospho (ST)	57.021465@C:22,79.966331@S:3,79.966331@S:9	2780.18	927.732	2780.17	927.731	0.0032	3	64.5	1.1	Elution from: 45.477 to 45.477 scan no 4227 cid35.00 polarity:+:MA10:m1s	45.477	1	26	K	E
AFAP1_HUMAN	Actin filament-associated protein 1 OS=Homo sapiens GN=AFAP1 PE=1 SV=2	KLSSERPSSDGEGVVENGITTCNGK	Carbamidomethyl (C);2 Phospho (ST)	57.021465@C:22,79.966331@S:3,79.966331@S:8	2780.18	927.732	2780.17	927.731	0.0024	3	60.1	1.4	Elution from: 45.223 to 45.223 scan no 4237 cid35.00 polarity:+:MA10:m1s	45.223	1	26	K	E
AFAP1_HUMAN	Actin filament-associated protein 1 OS=Homo sapiens GN=AFAP1 PE=1 SV=2	SGTSSPQSPVFR	Phospho (ST)	79.966331@S:8	1328.58	665.296	1328.58	665.295	0.0009	2	39.7	1.6	Elution from: 38.406 to 38.406 scan no 3376 cid35.00 polarity:+:MA10	38.406	0	26	K	H
AFF4_HUMAN	AF4/FMR2 family member 4 OS=Homo sapiens GN=AFF4 PE=1 SV=1	SSSPGKPQAVSSLNSSHSR	Phospho (ST)	79.966331@S:3	1991.91	664.976	1991.91	664.976	0.0011	3	57.9	2.1	Elution from: 30.261 to 30.261 scan no 2249 cid35.00 polarity:+:MA10:m1s	30.261	0	26	R	S
AFF4_HUMAN	AF4/FMR2 family member 4 OS=Homo sapiens GN=AFF4 PE=1 SV=1	SSSPGKPQAVSSLNSSHSR	Label:13C(6)15N(4) (R);Label:2H(4) (K);Phospho (ST)	10.008269@R:19,4.025107@K:6,79.966331@S:3	2005.94	669.654	2005.94	669.654	0.0003	3	44.4	2.8	Elution from: 30.328 to 30.328 scan no 2143 cid35.00 polarity:+:MA10:m1s	30.328	0	26	R	S
AFF4_HUMAN	AF4/FMR2 family member 4 OS=Homo sapiens GN=AFF4 PE=1 SV=1	ELLSPLSEPDDRYPLIVK	Label:13C(6)15N(4) (R);Label:2H(4) (K);2 Phospho (ST)	10.008269@R:12,4.025107@K:18,79.966331@S:4,79.966331@S:7	2257.09	753.37	2257.09	753.369	0.0023	3	30.8	9	Elution from: 74.352 to 74.352 scan no 6841 cid35.00 polarity:+:MA10:m1s	74.352	1	26	K	I
AFF4_HUMAN	AF4/FMR2 family member 4 OS=Homo sapiens GN=AFF4 PE=1 SV=1	ELLSPLSEPDDRYPLIVK	Label:13C(6)15N(4) (R);Label:2H(4) (K);Phospho (ST);Phospho (Y)	10.008269@R:12,4.025107@K:18,79.966331@S:4,79.966331@Y:13	2257.09	753.37	2257.09	753.369	0.0032	3	30.5	1	Elution from: 74.473 to 74.473 scan no 6843 cid35.00 polarity:+:MA10:m1s	74.473	1	25	K	I
AHNK_HUMAN	Neuroblast differentiation-associated protein AHNAK OS=Homo sapiens GN=AHNAK PE=1 SV=2	ASLGSLEGEAEAEASSPK	Label:2H(4) (K);Phospho (ST)	4.025107@K:18,79.966331@S:5	1815.81	908.912	1815.81	908.911	0.0017	2	120.3	25.5	Elution from: 65.004 to 65.004 scan no 6150 cid35.00 polarity:+:MA10	65.004	0	25	K	G
AHNK_HUMAN	Neuroblast differentiation-associated protein AHNAK OS=Homo sapiens GN=AHNAK PE=1 SV=2	LKSEDGVEGDLGETQSR	Label:13C(6)15N(4) (R);Label:2H(4) (K);Phospho (ST)	10.008269@R:17,4.025107@K:2,79.966331@S:3	1912.86	957.437	1912.86	957.437	0.001	2	91.4	75.4	Elution from: 41.189 to 41.189 scan no 3776 cid35.00 polarity:+:MA10	41.189	1	26	R	T
AHNK_HUMAN	Neuroblast differentiation-associated protein AHNAK OS=Homo sapiens GN=AHNAK PE=1 SV=2	ASLGSLEGEAEAEASSPK	Label:2H(4) (K);2 Phospho (ST)	4.025107@K:18,79.966331@S:5,79.966331@S:16	1895.78	948.895	1895.77	948.894	0.0016	2	81.6	14.3	Elution from: 67.126 to 67.126 scan no 6259 cid35.00 polarity:+:MA10	67.126	0	26	K	G
AHNK_HUMAN	Neuroblast differentiation-associated protein AHNAK OS=Homo sapiens GN=AHNAK PE=1 SV=2	ASLGSLEGEAEAEASSPK	Label:2H(4) (K);Phospho (ST)	4.025107@K:18,79.966331@S:16	1815.81	908.912	1815.81	908.911	0.0007	2	78.3	15.6	Elution from: 57.873 to 57.873 scan no 5374 cid35.00 polarity:+:MA10:m1s	57.873	0	26	K	G
AHNK_HUMAN	Neuroblast differentiation-associated protein AHNAK OS=Homo sapiens GN=AHNAK PE=1 SV=2	LPSGSGAASPTGSAVDIR	Label:13C(6)15N(4) (R);Phospho (ST)	10.008269@R:18,79.966331@S:3	1731.81	866.911	1731.81	866.911	0.0013	2	76.8	4.3	Elution from: 47.006 to 47.006 scan no 4260 cid35.00 polarity:+:MA10	47.006	0	25	R	A
AHNK_HUMAN	Neuroblast differentiation-associated protein AHNAK OS=Homo sapiens GN=AHNAK PE=1 SV=2	LPSGSGAASPTGSAVDIR	Label:13C(6)15N(4) (R);2 Phospho (ST)	10.008269@R:18,79.966331@S:3,79.966331@S:9	1811.78	906.895	1811.77	906.894	0.0023	2	76.3	1.5	Elution from: 48.892 to 48.892 scan no 4490 cid35.00 polarity:+:MA10	48.892	0	25	R	A
AHNK_HUMAN	Neuroblast differentiation-associated protein AHNAK OS=Homo sapiens GN=AHNAK PE=1 SV=2	GHYEVTGSDDETGK	Label:2H(4) (K);Phospho (ST)	4.025107@K:14,79.966331@S:8	1577.62	789.817	1577.62	789.817	0.0003	2	64.4	7	Elution from: 30.498 to 30.498 scan no 2163 cid35.00 polarity:+:MA10	30.498	0	26	K	L
AHNK_HUMAN	Neuroblast differentiation-associated protein AHNAK OS=Homo sapiens GN=AHNAK PE=1 SV=2	LPSGSGAASPTGSAVDIR	Label:13C(6)15N(4) (R);Phospho (ST)	10.008269@R:18,79.966331@S:9	1731.81	866.912	1731.81	866.911	0.0017	2	63.1	9.9	Elution from: 45.402 to 45.402 scan no 4139 cid35.00 polarity:+:MA10	45.402	0	26	R	A
AHNK_HUMAN	Neuroblast differentiation-associated protein AHNAK OS=Homo sapiens GN=AHNAK PE=1 SV=2	ASLGSLEGEAEAEASSPK	Label:2H(4) (K);2 Phospho (ST)	4.025107@K:18,79.966331@S:2,79.966331@S:16	1895.78	948.896	1895.77	948.894	0.0036	2	58.7	0.2	Elution from: 66.314 to 66.314 scan no 6293 cid35.00 polarity:+:MA10:m1s	66.314	0	26	K	G
AHNK_HUMAN	Neuroblast differentiation-associated protein AHNAK OS=Homo sapiens GN=AHNAK PE=1 SV=2	ASLGSLEGEAEAEASSPK	Label:2H(4) (K);Phospho (ST)	4.025107@K:18,79.966331@S:2	1815.81	606.277	1815.81	606.277	0.0007	3	58.5	9.4	Elution from: 64.973 to 64.973 scan no 6146 cid35.00 polarity:+:MA10:m1s	64.973	0	25	K	G
AHNK_HUMAN	Neuroblast differentiation-associated protein AHNAK OS=Homo sapiens GN=AHNAK PE=1 SV=2	GGVTGSPEASISGSK	Label:2H(4) (K);Phospho (ST)	4.025107@K:15,79.966331@S:6	1416.64	709.329	1416.64	709.329	0.0004	2	56.6	20.2	Elution from: 37.613 to 37.613 scan no 3175 cid35.00 polarity:+:MA10	37.613	0	25	K	G
AHNK_HUMAN	Neuroblast differentiation-associated protein AHNAK OS=Homo sapiens GN=AHNAK PE=1 SV=2	LPSGSGAASPTGSAVDIR	Label:13C(6)15N(4) (R);Phospho (ST)	10.008269@R:18,79.966331@S:5	1731.81	866.912	1731.81	866.911	0.0024	2	50.6	3.4	Elution from: 47.063 to 47.063 scan no 4317 cid35.00 polarity:+:MA10	47.063	0	25	R	A
AHNK_HUMAN	Neuroblast differentiation-associated protein AHNAK OS=Homo sapiens GN=AHNAK PE=1 SV=2	SSKASLGSLEGEAEAEASSPK	2 Phospho (ST)	79.966331@S:2,79.966331@S:5	2193.91	732.311	2193.91	732.31	0.0029	3	48.3	0	Elution from: 60.397 to 60.397 scan no 5780 cid35.00 polarity:+:MA10:m1s	60.397	1	26	K	G
AHNK_HUMAN	Neuroblast differentiation-associated protein AHNAK OS=Homo sapiens GN=AHNAK PE=1 SV=2	DIDISSPEFK	Label:2H(4) (K);Phospho (ST)	4.025107@K:10,79.966331@S:6	1233.55	617.781	1233.55	617.781	0.0007	2	47.9	13.2	Elution from: 55.860 to 55.860 scan no 5330 cid35.00 polarity:+:MA10	55.86	0	25	K	I
AHNK_HUMAN	Neuroblast differentiation-associated protein AHNAK OS=Homo sapiens GN=AHNAK PE=1 SV=2	GKGGVTGSPEASISGSK	2 Label:2H(4) (K);Phospho (ST)	4.025107@K:2,4.025107@K:17,79.966331@S:8	1605.79	536.269	1605.79	536.269	0.0003	3	43.7	5.7	Elution from: 33.001 to 33.001 scan no 2628 cid35.00 polarity:+:MA10	33.001	1	26	K	G
AHNK_HUMAN	Neuroblast differentiation-associated protein AHNAK OS=Homo sapiens GN=AHNAK PE=1 SV=2	KGDRSPEPGQTWTR	Phospho (ST)	79.966331@S:5	1693.76	565.593	1693.76	565.593	0.0005	3	38.7	29	Elution from: 31.784 to 31.784 scan no 2431 cid35.00 polarity:+:MA10	31.784	2	26	R	E
AHNK_HUMAN	Neuroblast differentiation-associated protein AHNAK OS=Homo sapiens GN=AHNAK PE=1 SV=2	SSKASLGSLEGEAEAEASSPK	2 Label:2H(4) (K);2 Phospho (ST)	4.025107@K:3,4.025107@K:21,79.966331@S:1,79.966331@S:2	2201.96	734.994	2201.96	734.993	0.0028	3	35.9	2.4	Elution from: 60.629 to 60.629 scan no 5661 cid35.00 polarity:+:MA10:m1s	60.629	1	26	K	G
AHNK_HUMAN	Neuroblast differentiation-associated protein AHNAK OS=Homo sapiens GN=AHNAK PE=1 SV=2	KGDRSPEPGQTWTR	2 Label:13C(6)15N(4) (R);Label:2H(4) (K);Phospho (ST)	10.008269@R:4,10.008269@R:14,4.025107@K:1,79.966331@S:5	1717.8	573.607	1717.8	573.607	0.001	3	35.4	30.7	Elution from: 31.847 to 31.847 scan no 2335 cid35.00 polarity:+:MA10	31.847	2	26	R	E
AHNK_HUMAN	Neuroblast differentiation-associated protein AHNAK OS=Homo sapiens GN=AHNAK PE=1 SV=2	LPSGSGAASPTGSAVDIR	Label:13C(6)15N(4) (R);2 Phospho (ST)	10.008269@R:18,79.966331@S:5,79.966331@S:13	1811.77	906.894	1811.77	906.894	0.001	2	35.4	2.9	Elution from: 49.048 to 49.048 scan no 4616 cid35.00 polarity:+:MA10	49.048	0	26	R	A
AHNK_HUMAN	Neuroblast differentiation-associated protein AHNAK OS=Homo sapiens GN=AHNAK PE=1 SV=2	GDRSPEPGQTWTR	2 Label:13C(6)15N(4) (R);Phospho (ST)	10.008269@R:3,10.008269@R:13,79.966331@S:4	1585.68	793.847	1585.68	793.847	0.0011	2	33.3	13	Elution from: 36.025 to 36.025 scan no 2900 cid35.00 polarity:+:MA10	36.025	1	25	K	E
AHNK_HUMAN	Neuroblast differentiation-associated protein AHNAK OS=Homo sapiens GN=AHNAK PE=1 SV=2	SSKASLGSLEGEAEAEASSPK	2 Label:2H(4) (K);2 Phospho (ST)	4.025107@K:3,4.025107@K:21,79.966331@S:5,79.966331@S:8	2201.96	734.994	2201.96	734.993	0.0016	3	33	1.5	Elution from: 60.757 to 60.757 scan no 5657 cid35.00 polarity:+:MA10:m1s	60.757	1	25	K	G
AHNK_HUMAN	Neuroblast differentiation-associated protein AHNAK OS=Homo sapiens GN=AHNAK PE=1 SV=2	LPSGSGAASPTGSAVDIR	Label:13C(6)15N(4) (R);2 Phospho (ST)	10.008269@R:18,79.966331@S:5,79.966331@S:9	1811.77	906.894	1811.77	906.894	0.0007	2	32	4.4	Elution from: 48.783 to 48.783 scan no 4518 cid35.00 polarity:+:MA10	48.783	0	25	R	A
AHNK_HUMAN	Neuroblast differentiation-associated protein AHNAK OS=Homo sapiens GN=AHNAK PE=1 SV=2	FGTFGGLGSK	Label:2H(4) (K);Phospho (ST)	4.025107@K:10,79.966331@S:9	1053.48	527.749	1053.48	527.749	-0.0001	2	31.3	22.6	Elution from: 55.301 to 55.301 scan no 5163 cid35.00 polarity:+:MA10	55.301	0	25	K	S
AHNK_HUMAN	Neuroblast differentiation-associated protein AHNAK OS=Homo sapiens GN=AHNAK PE=1 SV=2	SSKASLGSLEGEAEAEASSPK	2 Label:2H(4) (K);2 Phospho (ST)	4.025107@K:3,4.025107@K:21,79.966331@S:2,79.966331@S:5	2201.96	734.994	2201.96	734.993	0.0024	3	31.1	0	Elution from: 60.465 to 60.465 scan no 5700 cid35.00 polarity:+:MA10:m1s	60.465	1	26	K	G
AHNK_HUMAN	Neuroblast differentiation-associated protein AHNAK OS=Homo sapiens GN=AHNAK PE=1 SV=2	GDRSPEPGQTWTR	Phospho (ST)	79.966331@S:4	1565.66	522.895	1565.66	522.895	0	3	29.3	26.1	Elution from: 35.971 to 35.971 scan no 3017 cid35.00 polarity:+:MA10	35.971	1	26	K	E
AHNK_HUMAN	Neuroblast differentiation-associated protein AHNAK OS=Homo sapiens GN=AHNAK PE=1 SV=2	SSKASLGSLEGEAEAEASSPK	2 Phospho (ST)	79.966331@S:5,79.966331@S:8	2193.91	732.311	2193.91	732.31	0.0044	3	26.4	5.4	Elution from: 60.249 to 60.249 scan no 5684 cid35.00 polarity:+:MA10	60.249	1	26	K	G
AHNK_HUMAN	Neuroblast differentiation-associated protein AHNAK OS=Homo sapiens GN=AHNAK PE=1 SV=2	DIDISSPEFK	Phospho (ST)	79.966331@S:6	1229.52	615.768	1229.52	615.768	0.0006	2	24.6	5.1	Elution from: 56.444 to 56.444 scan no 5350 cid35.00 polarity:+:MA10	56.444	0	26	K	I
AHNK2_HUMAN	Protein AHNAK2 OS=Homo sapiens GN=AHNAK2 PE=1 SV=2	DAHDVSPTSTDTEAQLTVER	Label:13C(6)15N(4) (R);Phospho (ST)	10.008269@R:20,79.966332@T:10	2260.97	754.665	2260.97	754.665	0.0015	3	78.3	0	Elution from: 46.978 to 46.978 scan no 4270 cid35.00 polarity:+:MA10:m1s	46.978	0	26	R	Q
AHNK2_HUMAN	Protein AHNAK2 OS=Homo sapiens GN=AHNAK2 PE=1 SV=2	DAHDVSPTSTDTEAQLTVER	Label:13C(6)15N(4) (R);Phospho (ST)	10.008269@R:20,79.966331@S:9	2260.97	754.665	2260.97	754.665	0.0022	3	63.6	2.2	Elution from: 46.999 to 46.999 scan no 4259 cid35.00 polarity:+:MA10:m1s	46.999	0	25	R	Q
AIF1_HUMAN	Allograft inflammatory factor 1 OS=Homo sapiens GN=AIF1 PE=1 SV=1	LGVPKTHLELK	Label:2H(4) (K);Phospho (ST)	4.025107@K:11,79.966332@T:6	1317.73	330.441	1317.74	330.441	-0.002	4	29.9	21.1	Elution from: 21.377 to 21.377 scan no 1051 cid35.00 polarity:+:MA10	21.377	1	25	K	K
AIFM1_HUMAN	Apoptosis-inducing factor 1, mitochondrial OS=Homo sapiens GN=AIFM1 PE=1 SV=1	SLSAIDR	Phospho (ST)	79.966331@S:3	840.374	421.194	840.374	421.194	0	2	43.8	17.7	Elution from: 39.883 to 39.883 scan no 3609 cid35.00 polarity:+:MA10	39.883	0	26	R	A
AKA12_HUMAN	A-kinase anchor protein 12 OS=Homo sapiens GN=AKAP12 PE=1 SV=4	GLAEVQQDGEAEEGATSDGEK	Phospho (ST)	79.966331@S:17	2198.89	1100.45	2198.89	1100.45	0.0043	2	102.7	4.4	Elution from: 42.690 to 42.690 scan no 3795 cid35.00 polarity:+:MA10:m1s	42.69	0	26	K	K
AKA12_HUMAN	A-kinase anchor protein 12 OS=Homo sapiens GN=AKAP12 PE=1 SV=4	GLAEVQQDGEAEEGATSDGEK	Label:2H(4) (K);Phospho (ST)	4.025107@K:21,79.966331@S:17	2202.91	1102.46	2202.91	1102.46	0.0027	2	77	5.5	Elution from: 42.785 to 42.785 scan no 3882 cid35.00 polarity:+:MA10:m1s	42.785	0	25	K	K
AKA12_HUMAN	A-kinase anchor protein 12 OS=Homo sapiens GN=AKAP12 PE=1 SV=4	SAESPTSPVTSETGSTFK	Phospho (ST)	79.966332@T:6	1891.81	946.913	1891.81	946.912	0.0022	2	49.3	2.5	Elution from: 47.276 to 47.276 scan no 4297 cid35.00 polarity:+:MA10:m1s	47.276	0	25	K	K
AKA12_HUMAN	A-kinase anchor protein 12 OS=Homo sapiens GN=AKAP12 PE=1 SV=4	RPSESDKEDELDK	2 Phospho (ST)	79.966331@S:3,79.966331@S:5	1706.64	854.33	1706.64	854.329	0.0009	2	47.6	39.5	Elution from: 29.436 to 29.436 scan no 2008 cid35.00 polarity:+:MA10	29.436	1	26	R	V
AKA12_HUMAN	A-kinase anchor protein 12 OS=Homo sapiens GN=AKAP12 PE=1 SV=4	RPSESDKEDELDK	Phospho (ST)	79.966331@S:3	1626.68	814.346	1626.68	814.346	0.0006	2	44.8	9.4	Elution from: 27.538 to 27.538 scan no 1764 cid35.00 polarity:+:MA10	27.538	1	25	R	V
AKA12_HUMAN	A-kinase anchor protein 12 OS=Homo sapiens GN=AKAP12 PE=1 SV=4	VRRPSESDKEDELDK	Phospho (ST)	79.966331@S:7	1881.85	471.469	1881.85	471.469	0.0002	4	34.7	10	Elution from: 28.500 to 28.500 scan no 1899 cid35.00 polarity:+:MA10	28.5	2	26	R	V
AKA12_HUMAN	A-kinase anchor protein 12 OS=Homo sapiens GN=AKAP12 PE=1 SV=4	RPSESDKEDELDK	Label:13C(6)15N(4) (R);2 Label:2H(4) (K);Phospho (ST)	10.008269@R:1,4.025107@K:7,4.025107@K:13,79.966331@S:5	1644.74	549.253	1644.74	549.253	0.0003	3	26.1	0.7	Elution from: 27.442 to 27.442 scan no 1753 cid35.00 polarity:+:MA10	27.442	1	25	R	V
AKAP1_HUMAN	A-kinase anchor protein 1, mitochondrial OS=Homo sapiens GN=AKAP1 PE=1 SV=1	SLLSSPTK	Label:2H(4) (K);Phospho (ST)	4.025107@K:8,79.966332@T:7	915.461	458.738	915.462	458.738	-0.0004	2	29.3	0	Elution from: 39.778 to 39.778 scan no 3407 cid35.00 polarity:+:MA10	39.778	0	25	K	D
AKAP1_HUMAN	A-kinase anchor protein 1, mitochondrial OS=Homo sapiens GN=AKAP1 PE=1 SV=1	SLLSSPTK	Label:2H(4) (K);Phospho (ST)	4.025107@K:8,79.966331@S:5	915.462	458.738	915.462	458.738	0.0001	2	27.2	5.6	Elution from: 40.009 to 40.009 scan no 3453 cid35.00 polarity:+:MA10	40.009	0	26	K	D
AKAP1_HUMAN	A-kinase anchor protein 1, mitochondrial OS=Homo sapiens GN=AKAP1 PE=1 SV=1	SLLSSPTK	Phospho (ST)	79.966331@S:4	911.437	456.726	911.437	456.726	0.0003	2	24.2	0.2	Elution from: 39.359 to 39.359 scan no 3501 cid35.00 polarity:+:MA10	39.359	0	26	K	D
AKAP2_HUMAN	A-kinase anchor protein 2 OS=Homo sapiens GN=AKAP2 PE=1 SV=3	GQKSPGALETPSAAGSQGNTASQGK	Phospho (ST)	79.966331@S:4	2408.1	803.707	2408.1	803.706	0.0028	3	79.7	19.3	Elution from: 34.071 to 34.071 scan no 2780 cid35.00 polarity:+:MA10:m1s	34.071	1	26	K	E
AKAP2_HUMAN	A-kinase anchor protein 2 OS=Homo sapiens GN=AKAP2 PE=1 SV=3	DALGDSLQVPVSPSSTTSSR	Phospho (ST)	79.966331@S:12	2082.95	695.323	2082.95	695.323	0.001	3	64	19.1	Elution from: 57.582 to 57.582 scan no 5453 cid35.00 polarity:+:MA10:m1s	57.582	0	26	R	C
AKAP8_HUMAN	A-kinase anchor protein 8 OS=Homo sapiens GN=AKAP8 PE=1 SV=1	VDSEGDFSENDDAAGDFR	2 Phospho (ST)	79.966331@S:3,79.966331@S:8	2104.7	1053.35	2104.69	1053.35	0.0014	2	52.3	51.1	Elution from: 55.727 to 55.727 scan no 5354 cid35.00 polarity:+:MA10:m1s	55.727	0	26	R	S
AKAP8_HUMAN	A-kinase anchor protein 8 OS=Homo sapiens GN=AKAP8 PE=1 SV=1	LARVDSEGDFSENDDAAGDFR	2 Phospho (ST)	79.966331@S:6,79.966331@S:11	2444.92	815.98	2444.92	815.979	0.0024	3	32.3	29.3	Elution from: 55.437 to 55.437 scan no 5250 cid35.00 polarity:+:MA10:m1s	55.437	1	26	K	S
AKP13_HUMAN	A-kinase anchor protein 13 OS=Homo sapiens GN=AKAP13 PE=1 SV=2	RHSWGPGK	Phospho (ST)	79.966331@S:3	1003.44	335.487	1003.44	335.487	-0.0001	3	24.2	16.9	Elution from: 25.746 to 25.746 scan no 1524 cid35.00 polarity:+:MA10	25.746	1	26	R	N
AKTS1_HUMAN	Proline-rich AKT1 substrate 1 OS=Homo sapiens GN=AKT1S1 PE=1 SV=1	RTEARSSDEENGPPSSPDLDR	2 Phospho (ST)	79.966331@S:6,79.966331@S:16	2473.98	825.666	2473.97	825.666	0.0024	3	85.3	0	Elution from: 34.334 to 34.334 scan no 2689 cid35.00 polarity:+:MA10:m1s	34.334	2	26	K	I
AKTS1_HUMAN	Proline-rich AKT1 substrate 1 OS=Homo sapiens GN=AKT1S1 PE=1 SV=1	RTEARSSDEENGPPSSPDLDR	3 Phospho (ST)	79.966331@S:6,79.966331@S:7,79.966331@S:16	2553.94	852.322	2553.94	852.321	0.0021	3	61.7	3.9	Elution from: 36.544 to 36.544 scan no 3001 cid35.00 polarity:+:MA10:m1s	36.544	2	26	K	I
AKTS1_HUMAN	Proline-rich AKT1 substrate 1 OS=Homo sapiens GN=AKT1S1 PE=1 SV=1	LNTSDFQK	Label:2H(4) (K);Phospho (ST)	4.025107@K:8,79.966332@T:3	1035.46	518.736	1035.46	518.736	-0.0005	2	31.8	9.4	Elution from: 35.448 to 35.448 scan no 2957 cid35.00 polarity:+:MA10	35.448	0	25	R	L
ALG3_HUMAN	Dol-P-Man:Man(5)GlcNAc(2)-PP-Dol alpha-1,3-mannosyltransferase OS=Homo sapiens GN=ALG3 PE=1 SV=1	SGSAAQAEGLCK	Carbamidomethyl (C);Phospho (ST)	57.021465@C:11,79.966331@S:3	1257.51	629.761	1257.51	629.76	0.0008	2	67.1	8.3	Elution from: 31.789 to 31.789 scan no 2455 cid35.00 polarity:+:MA10	31.789	0	26	R	Q
AN18B_HUMAN	Ankyrin repeat domain-containing protein 18B OS=Homo sapiens GN=ANKRD18B PE=2 SV=1	ADDVSRHETMGSNISQLTDK	Oxidation (M);2 Phospho (ST)	15.994915@M:10,79.966332@T:9,79.966331@S:12	2378.95	595.744	2378.95	595.744	0.0021	4	37.9	9.3	Elution from: 21.983 to 21.983 scan no 1135 cid35.00 polarity:+:MA10:m1s	21.983	1	26	R	N
ANM3_HUMAN	Protein arginine N-methyltransferase 3 OS=Homo sapiens GN=PRMT3 PE=1 SV=3	GAVENEEDLPELSDSGDEAAWEDEDDADLPHGK	Label:2H(4) (K);2 Phospho (ST)	4.025107@K:33,79.966331@S:13,79.966331@S:15	3717.44	1240.15	3717.43	1240.15	0.0055	3	43.5	26.3	Elution from: 66.701 to 66.701 scan no 6203 cid35.00 polarity:+:MA10:m1s	66.701	0	25	R	Q
ANS1A_HUMAN	Ankyrin repeat and SAM domain-containing protein 1A OS=Homo sapiens GN=ANKS1A PE=1 SV=4	SPSFASEWDEIEK	Label:2H(4) (K);Phospho (ST)	4.025107@K:13,79.966331@S:3	1607.67	804.843	1607.67	804.842	0.0023	2	71.6	20.2	Elution from: 67.766 to 67.766 scan no 6295 cid35.00 polarity:+:MA10	67.766	0	26	K	I
ANS1A_HUMAN	Ankyrin repeat and SAM domain-containing protein 1A OS=Homo sapiens GN=ANKS1A PE=1 SV=4	SESLSNCSIGK	Carbamidomethyl (C);Phospho (ST)	57.021465@C:7,79.966331@S:3	1260.51	631.26	1260.51	631.26	0	2	32.2	9.3	Elution from: 36.625 to 36.625 scan no 2985 cid35.00 polarity:+:MA10	36.625	0	25	R	K
ANS4B_HUMAN	Ankyrin repeat and SAM domain-containing protein 4B OS=Homo sapiens GN=ANKS4B PE=2 SV=2	SSPSNASAPGTFGSLSK	Label:2H(4) (K);Phospho (ST)	4.025107@K:17,79.966331@S:4	1677.75	560.258	1677.75	560.259	-0.0028	3	27.9	14.4	Elution from: 32.945 to 32.945 scan no 2530 cid35.00 polarity:+:MA10	32.945	0	25	R	G
ANXA3_HUMAN	Annexin A3 OS=Homo sapiens GN=ANXA3 PE=1 SV=3	QMKDISQAYYTVYK	Oxidation (M);2 Phospho (ST);Phospho (Y)	15.994915@M:2,79.966331@S:6,79.966332@T:11,79.966331@Y:13	1992.74	665.255	1992.74	665.253	0.0058	3	22	0.5	Elution from: 32.746 to 32.746 scan no 2591 cid35.00 polarity:+:MA10	32.746	1	26	R	K
AP3B1_HUMAN	AP-3 complex subunit beta-1 OS=Homo sapiens GN=AP3B1 PE=1 SV=3	NFYESDDDQK	Label:2H(4) (K);Phospho (ST)	4.025107@K:10,79.966331@S:5	1343.49	672.75	1343.49	672.75	0.0006	2	39.6	23.1	Elution from: 37.827 to 37.827 scan no 3189 cid35.00 polarity:+:MA10	37.827	0	26	K	E
AP3B1_HUMAN	AP-3 complex subunit beta-1 OS=Homo sapiens GN=AP3B1 PE=1 SV=3	NFYESDDDQK	Phospho (ST)	79.966331@S:5	1339.46	670.738	1339.46	670.738	0.001	2	38.3	17.5	Elution from: 37.945 to 37.945 scan no 3206 cid35.00 polarity:+:MA10	37.945	0	26	K	E
AR6P4_HUMAN	ADP-ribosylation factor-like protein 6-interacting protein 4 OS=Homo sapiens GN=ARL6IP4 PE=1 SV=1	SAGEEEDGPVLTDEQK	Label:2H(4) (K);Phospho (ST)	4.025107@K:16,79.966331@S:1	1786.75	894.381	1786.74	894.38	0.0029	2	112.1	87.7	Elution from: 41.607 to 41.607 scan no 3650 cid35.00 polarity:+:MA10:m1s	41.607	0	25	R	S
AR6P4_HUMAN	ADP-ribosylation factor-like protein 6-interacting protein 4 OS=Homo sapiens GN=ARL6IP4 PE=1 SV=1	SAGEEEDGPVLTDEQK	Phospho (ST)	79.966331@S:1	1782.72	892.369	1782.72	892.367	0.0028	2	96.4	72.5	Elution from: 41.464 to 41.464 scan no 3776 cid35.00 polarity:+:MA10	41.464	0	26	R	S
ARGL1_HUMAN	Arginine and glutamate-rich protein 1 OS=Homo sapiens GN=ARGLU1 PE=1 SV=1	ASSPPDRIDIFGR	Phospho (ST)	79.966331@S:3	1509.7	504.24	1509.7	504.24	0.0009	3	42.4	7.8	Elution from: 57.569 to 57.569 scan no 5445 cid35.00 polarity:+:MA10:m1s	57.569	1	26	R	T
ARGL1_HUMAN	Arginine and glutamate-rich protein 1 OS=Homo sapiens GN=ARGLU1 PE=1 SV=1	ASSPPDRIDIFGR	2 Label:13C(6)15N(4) (R);Phospho (ST)	10.008269@R:7,10.008269@R:13,79.966331@S:3	1529.71	510.912	1529.71	510.912	-0.0008	3	40.3	15.2	Elution from: 57.636 to 57.636 scan no 5455 cid35.00 polarity:+:MA10	57.636	1	26	R	T
ARHG6_HUMAN	Rho guanine nucleotide exchange factor 6 OS=Homo sapiens GN=ARHGEF6 PE=1 SV=2	MSGFIYQGK	Oxidation (M);Phospho (ST)	15.994915@M:1,79.966331@S:2	1125.46	563.735	1125.46	563.736	-0.0003	2	37.7	34.7	Elution from: 45.415 to 45.415 scan no 4093 cid35.00 polarity:+:MA10	45.415	0	25	R	I
ARHG7_HUMAN	Rho guanine nucleotide exchange factor 7 OS=Homo sapiens GN=ARHGEF7 PE=1 SV=2	MSGFIYQGK	Label:2H(4) (K);Oxidation (M);Phospho (ST)	4.025107@K:9,15.994915@M:1,79.966331@S:2	1129.48	565.748	1129.48	565.748	-0.0003	2	36	32.7	Elution from: 45.241 to 45.241 scan no 4254 cid35.00 polarity:+:MA10	45.241	0	26	R	L
ARHGG_HUMAN	Rho guanine nucleotide exchange factor 16 OS=Homo sapiens GN=ARHGEF16 PE=1 SV=1	HQSFGAAVLSR	Label:13C(6)15N(4) (R);Phospho (ST)	10.008269@R:11,79.966331@S:3	1261.59	421.536	1261.58	421.535	0.0008	3	33.9	15.9	Elution from: 45.769 to 45.769 scan no 4137 cid35.00 polarity:+:MA10	45.769	0	25	R	E
ARI3A_HUMAN	AT-rich interactive domain-containing protein 3A OS=Homo sapiens GN=ARID3A PE=1 SV=2	AAAAGLGHPASPGGSEDGPPGSEEEDAAR	Label:13C(6)15N(4) (R);3 Phospho (ST)	10.008269@R:29,79.966331@S:11,79.966331@S:15,79.966331@S:22	2909.09	970.703	2909.08	970.701	0.0046	3	57.6	52.9	Elution from: 44.686 to 44.686 scan no 4009 cid35.00 polarity:+:MA10:m1s	44.686	0	26	R	E
ARI4A_HUMAN	AT-rich interactive domain-containing protein 4A OS=Homo sapiens GN=ARID4A PE=1 SV=3	SSLPVTEDEKEEESSEEEDEDK	2 Label:2H(4) (K);2 Phospho (ST)	4.025107@K:10,4.025107@K:22,79.966331@S:14,79.966331@S:15	2707.03	903.351	2707.03	903.35	0.0014	3	37.6	25.5	Elution from: 41.938 to 41.938 scan no 3682 cid35.00 polarity:+:MA10:m1s	41.938	1	25	R	R
ARI4B_HUMAN	AT-rich interactive domain-containing protein 4B OS=Homo sapiens GN=ARID4B PE=1 SV=2	DIEVLSEDTDYEEDEVTK	Phospho (ST);Phospho (Y)	79.966331@S:6,79.966331@Y:11	2287.86	1144.94	2287.85	1144.93	0.0016	2	79.1	10.8	Elution from: 62.285 to 62.285 scan no 5862 cid35.00 polarity:+:MA10:m1s	62.285	0	26	K	K
ARI4B_HUMAN	AT-rich interactive domain-containing protein 4B OS=Homo sapiens GN=ARID4B PE=1 SV=2	DIEVLSEDTDYEEDEVTKK	2 Phospho (ST)	79.966331@S:6,79.966332@T:9	2415.95	806.324	2415.95	806.324	0.0021	3	52	10.4	Elution from: 56.866 to 56.866 scan no 5455 cid35.00 polarity:+:MA10:m1s	56.866	1	26	K	R
ARI4B_HUMAN	AT-rich interactive domain-containing protein 4B OS=Homo sapiens GN=ARID4B PE=1 SV=2	DIEVLSEDTDYEEDEVTKK	2 Label:2H(4) (K);2 Phospho (ST)	4.025107@K:18,4.025107@K:19,79.966331@S:6,79.966332@T:9	2424	809.008	2424	809.007	0.0013	3	29.9	7.4	Elution from: 57.231 to 57.231 scan no 5364 cid35.00 polarity:+:MA10:m1s	57.231	1	26	K	R
ARMX3_HUMAN	Armadillo repeat-containing X-linked protein 3 OS=Homo sapiens GN=ARMCX3 PE=1 SV=1	YNDWSDDDDDSNESK	Phospho (ST)	79.966331@S:5	1883.6	942.808	1883.6	942.808	0.0014	2	88.3	45.7	Elution from: 39.111 to 39.111 scan no 3500 cid35.00 polarity:+:MA10	39.111	0	26	R	S
ARMX3_HUMAN	Armadillo repeat-containing X-linked protein 3 OS=Homo sapiens GN=ARMCX3 PE=1 SV=1	YNDWSDDDDDSNESK	Label:2H(4) (K);Phospho (ST)	4.025107@K:15,79.966331@S:5	1887.63	944.821	1887.63	944.82	0.0017	2	77.1	28	Elution from: 39.350 to 39.350 scan no 3350 cid35.00 polarity:+:MA10:m1s	39.35	0	25	R	S
ARRB1_HUMAN	Beta-arrestin-1 OS=Homo sapiens GN=ARRB1 PE=1 SV=2	GMKDDKEEEEDGTGSPQLNNR	Label:13C(6)15N(4) (R);2 Label:2H(4) (K);Oxidation (M);Phospho (ST)	10.008269@R:21,4.025107@K:3,4.025107@K:6,15.994915@M:2,79.966331@S:15	2462.04	821.687	2462.04	821.687	0.0001	3	56.5	8.4	Elution from: 28.877 to 28.877 scan no 2022 cid35.00 polarity:+:MA10:m1s	28.877	2	26	K	-
ASH1L_HUMAN	Histone-lysine N-methyltransferase ASH1L OS=Homo sapiens GN=ASH1L PE=1 SV=2	RSSSESTSSTVNGVPSRSPR	2 Phospho (ST)	79.966331@S:6,79.966332@T:7	2236.95	746.656	2236.95	746.656	-0.0013	3	27.3	13	Elution from: 20.625 to 20.625 scan no 947 cid35.00 polarity:+:MA10	20.625	2	25	K	L
ASHWN_HUMAN	Ashwin OS=Homo sapiens GN=C2orf49 PE=1 SV=1	SPSGPVKSPPLSPVGTTPVK	2 Label:2H(4) (K);2 Phospho (ST)	4.025107@K:7,4.025107@K:20,79.966331@S:8,79.966332@T:16	2099.06	700.693	2099.06	700.692	0.0006	3	55.2	0.2	Elution from: 46.770 to 46.770 scan no 4249 cid35.00 polarity:+:MA10:m1s	46.77	1	26	K	L
ASHWN_HUMAN	Ashwin OS=Homo sapiens GN=C2orf49 PE=1 SV=1	SPSGPVKSPPLSPVGTTPVK	2 Phospho (ST)	79.966331@S:8,79.966332@T:17	2091.01	698.01	2091.01	698.009	0.0011	3	41.7	0.6	Elution from: 47.802 to 47.802 scan no 4555 cid35.00 polarity:+:MA10:m1s	47.802	1	26	K	L
ASHWN_HUMAN	Ashwin OS=Homo sapiens GN=C2orf49 PE=1 SV=1	SPSGPVKSPPLSPVGTTPVK	2 Phospho (ST)	79.966331@S:8,79.966332@T:16	2091.01	698.01	2091.01	698.009	0.0026	3	40.1	0.8	Elution from: 46.820 to 46.820 scan no 4253 cid35.00 polarity:+:MA10:m1s	46.82	1	26	K	L
ASHWN_HUMAN	Ashwin OS=Homo sapiens GN=C2orf49 PE=1 SV=1	SPSGPVKSPPLSPVGTTPVK	2 Phospho (ST)	79.966331@S:1,79.966331@S:8	2091.01	698.009	2091.01	698.009	0.001	3	38.4	4.5	Elution from: 49.974 to 49.974 scan no 4610 cid35.00 polarity:+:MA10:m1s	49.974	1	25	K	L
ASHWN_HUMAN	Ashwin OS=Homo sapiens GN=C2orf49 PE=1 SV=1	SPSGPVKSPPLSPVGTTPVK	2 Phospho (ST)	79.966331@S:3,79.966331@S:8	2091.01	698.01	2091.01	698.009	0.0028	3	37.3	1	Elution from: 50.004 to 50.004 scan no 4604 cid35.00 polarity:+:MA10:m1s	50.004	1	26	K	L
AT2A2_HUMAN	Sarcoplasmic/endoplasmic reticulum calcium ATPase 2 OS=Homo sapiens GN=ATP2A2 PE=1 SV=1	EFDELNPSAQR	Phospho (ST)	79.966331@S:8	1384.57	693.291	1384.57	693.29	0.0012	2	44	42.2	Elution from: 46.433 to 46.433 scan no 4362 cid35.00 polarity:+:MA10	46.433	0	26	R	D
AT2A2_HUMAN	Sarcoplasmic/endoplasmic reticulum calcium ATPase 2 OS=Homo sapiens GN=ATP2A2 PE=1 SV=1	AFTGREFDELNPSAQR	Phospho (ST)	79.966331@S:13	1916.84	639.955	1916.84	639.955	0.0006	3	32.4	20.6	Elution from: 53.293 to 53.293 scan no 5071 cid35.00 polarity:+:MA10:m1s	53.293	1	26	K	D
AT2B1_HUMAN	Plasma membrane calcium-transporting ATPase 1 OS=Homo sapiens GN=ATP2B1 PE=1 SV=3	IEDSEPHIPLIDDTDAEDDAPTK	Phospho (ST)	79.966331@S:4	2615.12	872.714	2615.12	872.713	0.0029	3	72	29.3	Elution from: 63.143 to 63.143 scan no 5936 cid35.00 polarity:+:MA10:m1s	63.143	0	26	R	R
AT2B1_HUMAN	Plasma membrane calcium-transporting ATPase 1 OS=Homo sapiens GN=ATP2B1 PE=1 SV=3	IEDSEPHIPLIDDTDAEDDAPTK	Label:2H(4) (K);Phospho (ST)	4.025107@K:23,79.966331@S:4	2619.14	874.055	2619.14	874.054	0.0015	3	59.5	23.5	Elution from: 63.488 to 63.488 scan no 5938 cid35.00 polarity:+:MA10:m1s	63.488	0	26	R	R
AT2B1_HUMAN	Plasma membrane calcium-transporting ATPase 1 OS=Homo sapiens GN=ATP2B1 PE=1 SV=3	IEDSEPHIPLIDDTDAEDDAPTK	Phospho (ST)	79.966332@T:14	2615.12	872.714	2615.12	872.713	0.0038	3	53.6	0.5	Elution from: 63.365 to 63.365 scan no 6052 cid35.00 polarity:+:MA10:m1s	63.365	0	26	R	R
AT2B1_HUMAN	Plasma membrane calcium-transporting ATPase 1 OS=Homo sapiens GN=ATP2B1 PE=1 SV=3	IEDSEPHIPLIDDTDAEDDAPTK	Label:2H(4) (K);2 Phospho (ST)	4.025107@K:23,79.966331@S:4,79.966332@T:14	2699.11	900.71	2699.11	900.71	0.0015	3	52.1	35.5	Elution from: 66.377 to 66.377 scan no 6186 cid35.00 polarity:+:MA10:m1s	66.377	0	26	R	R
AT2B1_HUMAN	Plasma membrane calcium-transporting ATPase 1 OS=Homo sapiens GN=ATP2B1 PE=1 SV=3	SATSSSPGSPLHSLETSL	Phospho (ST)	79.966331@S:17	1836.81	919.415	1836.81	919.414	0.0007	2	34.4	0	Elution from: 59.127 to 59.127 scan no 5590 cid35.00 polarity:+:MA10:m1s	59.127	0	26	K	-
AT8B1_HUMAN	Probable phospholipid-transporting ATPase IC OS=Homo sapiens GN=ATP8B1 PE=1 SV=3	ESKYANNAIKTYK	2 Label:2H(4) (K);Phospho (ST);Phospho (Y)	4.025107@K:10,4.025107@K:13,79.966332@T:11,79.966331@Y:4	1696.77	566.597	1696.77	566.598	-0.0012	3	28.4	3.1	Elution from: 22.750 to 22.750 scan no 1207 cid35.00 polarity:+:MA10	22.75	2	26	K	Y
ATAD2_HUMAN	ATPase family AAA domain-containing protein 2 OS=Homo sapiens GN=ATAD2 PE=1 SV=1	NNSNTCNIENELEDSRK	Carbamidomethyl (C);Phospho (ST)	57.021465@C:6,79.966331@S:3	2115.85	706.292	2115.85	706.292	0.001	3	36.3	15.5	Elution from: 50.335 to 50.335 scan no 4671 cid35.00 polarity:+:MA10	50.335	1	25	R	T
ATRX_HUMAN	Transcriptional regulator ATRX OS=Homo sapiens GN=ATRX PE=1 SV=5	RPTETNPVTSNSDEECNETVK	Carbamidomethyl (C);Label:13C(6)15N(4) (R);Label:2H(4) (K);Phospho (ST)	57.021465@C:16,10.008269@R:1,4.025107@K:21,79.966331@S:12	2500.06	834.361	2500.06	834.361	0.0018	3	90.5	20.4	Elution from: 35.562 to 35.562 scan no 2839 cid35.00 polarity:+:MA10:m1s	35.562	0	25	R	E
ATRX_HUMAN	Transcriptional regulator ATRX OS=Homo sapiens GN=ATRX PE=1 SV=5	RPTETNPVTSNSDEECNETVK	Carbamidomethyl (C);Phospho (ST)	57.021465@C:16,79.966331@S:12	2486.03	829.683	2486.03	829.683	0.0018	3	79.4	18.9	Elution from: 35.810 to 35.810 scan no 3012 cid35.00 polarity:+:MA10:m1s	35.81	0	25	R	E
ATRX_HUMAN	Transcriptional regulator ATRX OS=Homo sapiens GN=ATRX PE=1 SV=5	LTPVSLSNSPIK	Phospho (ST)	79.966331@S:9	1334.69	668.35	1334.68	668.35	0.0014	2	42.9	0	Elution from: 51.377 to 51.377 scan no 4778 cid35.00 polarity:+:MA10	51.377	0	25	K	G
ATRX_HUMAN	Transcriptional regulator ATRX OS=Homo sapiens GN=ATRX PE=1 SV=5	LTPVSLSNSPIK	2 Phospho (ST)	79.966331@S:5,79.966331@S:9	1414.65	708.333	1414.65	708.333	0.0011	2	37.2	0	Elution from: 55.533 to 55.533 scan no 5298 cid35.00 polarity:+:MA10	55.533	0	25	K	G
ATRX_HUMAN	Transcriptional regulator ATRX OS=Homo sapiens GN=ATRX PE=1 SV=5	KKDELSDYAEK	Phospho (ST)	79.966331@S:6	1404.62	469.213	1404.62	469.213	-0.0001	3	35.6	27.8	Elution from: 33.536 to 33.536 scan no 2614 cid35.00 polarity:+:MA10	33.536	2	25	K	S
ATRX_HUMAN	Transcriptional regulator ATRX OS=Homo sapiens GN=ATRX PE=1 SV=5	LTPVSLSNSPIK	Label:2H(4) (K);2 Phospho (ST)	4.025107@K:12,79.966331@S:5,79.966331@S:7	1418.68	710.346	1418.68	710.345	0.0007	2	35.4	1.8	Elution from: 55.799 to 55.799 scan no 5210 cid35.00 polarity:+:MA10	55.799	0	25	K	G
ATRX_HUMAN	Transcriptional regulator ATRX OS=Homo sapiens GN=ATRX PE=1 SV=5	LTPVSLSNSPIK	Label:2H(4) (K);2 Phospho (ST)	4.025107@K:12,79.966331@S:5,79.966331@S:9	1418.68	710.346	1418.68	710.345	0.001	2	33.6	0	Elution from: 55.805 to 55.805 scan no 5237 cid35.00 polarity:+:MA10	55.805	0	26	K	G
ATRX_HUMAN	Transcriptional regulator ATRX OS=Homo sapiens GN=ATRX PE=1 SV=5	LTPVSLSNSPIK	2 Phospho (ST)	79.966331@S:5,79.966331@S:7	1414.65	708.333	1414.65	708.333	0.0008	2	32.6	1.9	Elution from: 55.906 to 55.906 scan no 5295 cid35.00 polarity:+:MA10	55.906	0	26	K	G
ATRX_HUMAN	Transcriptional regulator ATRX OS=Homo sapiens GN=ATRX PE=1 SV=5	QSETVDQNSDSDEMLAILK	2 Phospho (ST)	79.966331@S:9,79.966331@S:11	2281.91	761.644	2281.91	761.643	0.0041	3	27.8	17.3	Elution from: 76.076 to 76.076 scan no 7049 cid35.00 polarity:+:MA10:m1s	76.076	0	25	K	E
ATX2_HUMAN	Ataxin-2 OS=Homo sapiens GN=ATXN2 PE=1 SV=2	ENIKPNETSPSFSK	2 Label:2H(4) (K);Phospho (ST)	4.025107@K:4,4.025107@K:14,79.966331@S:9	1664.79	555.937	1664.79	555.937	-0.0005	3	31.3	8.4	Elution from: 36.391 to 36.391 scan no 2958 cid35.00 polarity:+:MA10	36.391	0	26	K	A
ATX2L_HUMAN	Ataxin-2-like protein OS=Homo sapiens GN=ATXN2L PE=1 SV=2	EVDGLLTSEPMGSPVSSK	Phospho (ST)	79.966331@S:13	1911.86	956.935	1911.85	956.934	0.0026	2	78.7	27.9	Elution from: 59.359 to 59.359 scan no 5562 cid35.00 polarity:+:MA10:m1s	59.359	0	26	K	T
ATX2L_HUMAN	Ataxin-2-like protein OS=Homo sapiens GN=ATXN2L PE=1 SV=2	QGSGRESPSLASR	2 Label:13C(6)15N(4) (R);Phospho (ST)	10.008269@R:5,10.008269@R:13,79.966331@S:7	1430.64	477.888	1430.64	477.888	-0.0001	3	37.4	18.2	Elution from: 27.855 to 27.855 scan no 1800 cid35.00 polarity:+:MA10	27.855	1	26	R	E
ATX2L_HUMAN	Ataxin-2-like protein OS=Homo sapiens GN=ATXN2L PE=1 SV=2	QGSGRESPSLASR	Phospho (ST)	79.966331@S:7	1410.63	471.216	1410.63	471.216	0.0001	3	25	5.9	Elution from: 27.847 to 27.847 scan no 1799 cid35.00 polarity:+:MA10	27.847	1	26	R	E
AUTS2_HUMAN	Autism susceptibility gene 2 protein OS=Homo sapiens GN=AUTS2 PE=1 SV=1	RDSSVSKDDK	Label:13C(6)15N(4) (R);Phospho (ST)	10.008269@R:1,79.966331@S:4	1225.52	409.514	1225.52	409.514	-0.0028	3	22	16.9	Elution from: 32.593 to 32.593 scan no 2545 cid35.00 polarity:+:MA10:m1s	32.593	2	26	K	E
B2L13_HUMAN	Bcl-2-like protein 13 OS=Homo sapiens GN=BCL2L13 PE=1 SV=1	SSPATSLFVELDEEEVK	Phospho (ST)	79.966331@S:2	1958.88	980.447	1958.88	980.445	0.0038	2	72.6	0	Elution from: 75.611 to 75.611 scan no 6902 cid35.00 polarity:+:MA10:m1s	75.611	0	26	K	A
B2L13_HUMAN	Bcl-2-like protein 13 OS=Homo sapiens GN=BCL2L13 PE=1 SV=1	SENNSSNSDIVHVEK	Phospho (ST)	79.966331@S:6	1737.72	580.248	1737.72	580.248	0.0002	3	43.5	8.1	Elution from: 34.834 to 34.834 scan no 2855 cid35.00 polarity:+:MA10	34.834	0	26	K	E
BAG3_HUMAN	BAG family molecular chaperone regulator 3 OS=Homo sapiens GN=BAG3 PE=1 SV=3	SQSPAASDCSSSSSSASLPSSGR	Carbamidomethyl (C);Phospho (ST)	57.021465@C:9,79.966331@S:3	2278.9	1140.46	2278.9	1140.46	0.0034	2	115.1	2.4	Elution from: 34.767 to 34.767 scan no 2726 cid35.00 polarity:+:MA10:m1s	34.767	0	25	R	S
BAG3_HUMAN	BAG family molecular chaperone regulator 3 OS=Homo sapiens GN=BAG3 PE=1 SV=3	VPPAPVPCPPPSPGPSAVPSSPK	Carbamidomethyl (C);2 Phospho (ST)	57.021465@C:8,79.966331@S:12,79.966331@S:21	2378.08	793.702	2378.08	793.7	0.0044	3	36.6	0	Elution from: 50.528 to 50.528 scan no 4714 cid35.00 polarity:+:MA10:m1s	50.528	0	26	K	S
BAG3_HUMAN	BAG family molecular chaperone regulator 3 OS=Homo sapiens GN=BAG3 PE=1 SV=3	SQSPAASDCSSSSSSASLPSSGR	Carbamidomethyl (C);Label:13C(6)15N(4) (R);Phospho (ST)	57.021465@C:9,10.008269@R:23,79.966331@S:3	2288.91	763.977	2288.91	763.977	0.0001	3	29.5	1.1	Elution from: 34.334 to 34.334 scan no 2798 cid35.00 polarity:+:MA10:m1s	34.334	0	26	R	S
BAP1_HUMAN	Ubiquitin carboxyl-terminal hydrolase BAP1 OS=Homo sapiens GN=BAP1 PE=1 SV=2	GSSPSIRPIQGSQGSSSPVEK	2 Phospho (ST)	79.966331@S:2,79.966331@S:17	2243.98	749.002	2243.98	749.001	0.0011	3	30.2	19.3	Elution from: 40.467 to 40.467 scan no 3680 cid35.00 polarity:+:MA10:m1s	40.467	0	26	K	E
BAP18_HUMAN	Chromatin complexes subunit BAP18 OS=Homo sapiens GN=BAP18 PE=1 SV=1	VYEDSGIPLPAESPKK	Phospho (ST)	79.966331@S:13	1808.86	603.961	1808.86	603.961	0.0009	3	66.2	54.6	Elution from: 48.772 to 48.772 scan no 4609 cid35.00 polarity:+:MA10	48.772	1	26	K	G
BAP18_HUMAN	Chromatin complexes subunit BAP18 OS=Homo sapiens GN=BAP18 PE=1 SV=1	VYEDSGIPLPAESPKK	2 Label:2H(4) (K);Phospho (ST)	4.025107@K:15,4.025107@K:16,79.966331@S:13	1816.91	606.644	1816.91	606.644	0.0019	3	40.9	20.3	Elution from: 49.249 to 49.249 scan no 4582 cid35.00 polarity:+:MA10:m1s	49.249	1	26	K	G
BASI_HUMAN	Basigin OS=Homo sapiens GN=BSG PE=1 SV=2	RKPEDVLDDDDAGSAPLK	Label:13C(6)15N(4) (R);2 Label:2H(4) (K);Phospho (ST)	10.008269@R:1,4.025107@K:2,4.025107@K:18,79.966331@S:14	2037.97	680.332	2037.97	680.332	0.0009	3	83.8	59.9	Elution from: 46.359 to 46.359 scan no 4211 cid35.00 polarity:+:MA10:m1s	46.359	1	26	R	S
BASI_HUMAN	Basigin OS=Homo sapiens GN=BSG PE=1 SV=2	RKPEDVLDDDDAGSAPLK	Phospho (ST)	79.966331@S:14	2019.92	674.313	2019.91	674.312	0.0022	3	71	49.5	Elution from: 46.484 to 46.484 scan no 4335 cid35.00 polarity:+:MA10:m1s	46.484	1	26	R	S
BASP1_HUMAN	Brain acid soluble protein 1 OS=Homo sapiens GN=BASP1 PE=1 SV=2	ETPAATEAPSSTPK	Phospho (ST)	79.966332@T:12	1465.64	733.825	1465.63	733.824	0.0013	2	70.9	12	Elution from: 29.345 to 29.345 scan no 2116 cid35.00 polarity:+:MA10	29.345	0	26	K	A
BASP1_HUMAN	Brain acid soluble protein 1 OS=Homo sapiens GN=BASP1 PE=1 SV=2	KTEAPAAPAAQETKSDGAPASDSKPGSSEAAPSSK	Phospho (ST)	79.966331@S:15	3405.56	852.398	3405.56	852.397	0.004	4	51.3	3.9	Elution from: 30.312 to 30.312 scan no 2256 cid35.00 polarity:+:MA10:m1s	30.312	2	26	K	E
BASP1_HUMAN	Brain acid soluble protein 1 OS=Homo sapiens GN=BASP1 PE=1 SV=2	KAEGAATEEEGTPKESEPQAAAEPAEAK	Phospho (ST)	79.966332@T:12	2905.29	727.329	2905.29	727.329	0.0017	4	31.1	7.2	Elution from: 32.711 to 32.711 scan no 2569 cid35.00 polarity:+:MA10:m1s	32.711	2	26	K	E
BAZ1A_HUMAN	Bromodomain adjacent to zinc finger domain protein 1A OS=Homo sapiens GN=BAZ1A PE=1 SV=2	LSSSFSSR	Label:13C(6)15N(4) (R);Phospho (ST)	10.008269@R:8,79.966331@S:2	959.399	480.707	959.399	480.707	0.0002	2	50	9.7	Elution from: 37.168 to 37.168 scan no 3093 cid35.00 polarity:+:MA10	37.168	0	26	K	G
BAZ1A_HUMAN	Bromodomain adjacent to zinc finger domain protein 1A OS=Homo sapiens GN=BAZ1A PE=1 SV=2	RQSPEPSPVTLGR	Phospho (ST)	79.966331@S:7	1502.72	501.915	1502.72	501.915	-0.0005	3	41	6.1	Elution from: 39.316 to 39.316 scan no 3396 cid35.00 polarity:+:MA10	39.316	1	25	K	R
BAZ1A_HUMAN	Bromodomain adjacent to zinc finger domain protein 1A OS=Homo sapiens GN=BAZ1A PE=1 SV=2	RQSPEPSPVTLGR	Phospho (ST)	79.966331@S:3	1502.72	501.916	1502.72	501.915	0.0005	3	32.5	13.2	Elution from: 39.202 to 39.202 scan no 3511 cid35.00 polarity:+:MA10	39.202	1	26	K	R
BAZ1A_HUMAN	Bromodomain adjacent to zinc finger domain protein 1A OS=Homo sapiens GN=BAZ1A PE=1 SV=2	LSSSFSSR	Label:13C(6)15N(4) (R);Phospho (ST)	10.008269@R:8,79.966331@S:6	959.399	480.707	959.399	480.707	0	2	32	0.7	Elution from: 36.565 to 36.565 scan no 3031 cid35.00 polarity:+:MA10	36.565	0	25	K	G
BAZ1B_HUMAN	Tyrosine-protein kinase BAZ1B OS=Homo sapiens GN=BAZ1B PE=1 SV=2	LAEDEGDSEPEAVGQSR	Label:13C(6)15N(4) (R);Phospho (ST)	10.008269@R:17,79.966331@S:8	1877.76	939.886	1877.76	939.885	0.0021	2	104.4	87.5	Elution from: 37.962 to 37.962 scan no 3208 cid35.00 polarity:+:MA10	37.962	0	26	R	G
BAZ1B_HUMAN	Tyrosine-protein kinase BAZ1B OS=Homo sapiens GN=BAZ1B PE=1 SV=2	LAEDEGDSEPEAVGQSR	Phospho (ST)	79.966331@S:8	1867.75	934.881	1867.75	934.881	0.0012	2	101.8	71	Elution from: 37.983 to 37.983 scan no 3317 cid35.00 polarity:+:MA10	37.983	0	25	R	G
BAZ1B_HUMAN	Tyrosine-protein kinase BAZ1B OS=Homo sapiens GN=BAZ1B PE=1 SV=2	KSDGACDSPSSDKENSSQIAQDHQK	Carbamidomethyl (C);2 Phospho (ST)	57.021465@C:6,79.966331@S:8,79.966331@S:11	2878.11	960.379	2878.11	960.378	0.0023	3	70.6	0	Elution from: 28.054 to 28.054 scan no 1845 cid35.00 polarity:+:MA10:m1s	28.054	2	25	K	K
BAZ1B_HUMAN	Tyrosine-protein kinase BAZ1B OS=Homo sapiens GN=BAZ1B PE=1 SV=2	KFPDRLAEDEGDSEPEAVGQSR	Phospho (ST)	79.966331@S:13	2511.1	838.039	2511.09	838.038	0.0038	3	62.8	29.7	Elution from: 46.233 to 46.233 scan no 4311 cid35.00 polarity:+:MA10:m1s	46.233	2	26	K	G
BAZ1B_HUMAN	Tyrosine-protein kinase BAZ1B OS=Homo sapiens GN=BAZ1B PE=1 SV=2	FPDRLAEDEGDSEPEAVGQSR	Phospho (ST)	79.966331@S:12	2383	795.341	2383	795.339	0.0033	3	54.9	39	Elution from: 48.746 to 48.746 scan no 4568 cid35.00 polarity:+:MA10:m1s	48.746	1	25	K	G
BAZ1B_HUMAN	Tyrosine-protein kinase BAZ1B OS=Homo sapiens GN=BAZ1B PE=1 SV=2	KSDGACDSPSSDKENSSQIAQDHQK	Carbamidomethyl (C);3 Label:2H(4) (K);2 Phospho (ST)	57.021465@C:6,4.025107@K:1,4.025107@K:13,4.025107@K:25,79.966331@S:10,79.966331@S:11	2890.19	723.554	2890.19	723.554	0.0021	4	40.7	3	Elution from: 27.776 to 27.776 scan no 1796 cid35.00 polarity:+:MA10:m1s	27.776	2	25	K	K
BAZ1B_HUMAN	Tyrosine-protein kinase BAZ1B OS=Homo sapiens GN=BAZ1B PE=1 SV=2	SDVQEESEGSDTDDNKDSAAFEDNEVQDEFLEK	2 Label:2H(4) (K);2 Phospho (ST)	4.025107@K:16,4.025107@K:33,79.966331@S:7,79.966332@T:12	3888.51	1297.18	3888.5	1297.17	0.0055	3	39.8	0	Elution from: 65.918 to 65.918 scan no 6136 cid35.00 polarity:+:MA10:m1s	65.918	1	25	R	L
BAZ1B_HUMAN	Tyrosine-protein kinase BAZ1B OS=Homo sapiens GN=BAZ1B PE=1 SV=2	KSDGACDSPSSDKENSSQIAQDHQK	Carbamidomethyl (C);2 Phospho (ST)	57.021465@C:6,79.966331@S:10,79.966331@S:11	2878.11	720.535	2878.11	720.535	0.0015	4	34.3	1.4	Elution from: 27.725 to 27.725 scan no 1898 cid35.00 polarity:+:MA10:m1s	27.725	2	26	K	K
BAZ1B_HUMAN	Tyrosine-protein kinase BAZ1B OS=Homo sapiens GN=BAZ1B PE=1 SV=2	KSDGACDSPSSDKENSSQIAQDHQK	Carbamidomethyl (C);3 Label:2H(4) (K);2 Phospho (ST)	57.021465@C:6,4.025107@K:1,4.025107@K:13,4.025107@K:25,79.966331@S:8,79.966331@S:11	2890.19	964.404	2890.19	964.403	0.0021	3	30.8	2.7	Elution from: 28.025 to 28.025 scan no 1839 cid35.00 polarity:+:MA10:m1s	28.025	2	26	K	K
BAZ1B_HUMAN	Tyrosine-protein kinase BAZ1B OS=Homo sapiens GN=BAZ1B PE=1 SV=2	KSDGACDSPSSDKENSSQIAQDHQK	Carbamidomethyl (C);Phospho (ST)	57.021465@C:6,79.966331@S:17	2798.15	700.544	2798.14	700.544	0.0015	4	29.2	0.9	Elution from: 26.997 to 26.997 scan no 1766 cid35.00 polarity:+:MA10:m1s	26.997	2	26	K	K
BAZ1B_HUMAN	Tyrosine-protein kinase BAZ1B OS=Homo sapiens GN=BAZ1B PE=1 SV=2	RQSLELQK	Label:13C(6)15N(4) (R);Label:2H(4) (K);Phospho (ST)	10.008269@R:1,4.025107@K:8,79.966331@S:3	1094.57	548.29	1094.57	548.29	-0.0004	2	25.7	8.9	Elution from: 31.385 to 31.385 scan no 2271 cid35.00 polarity:+:MA10	31.385	1	26	R	C
BAZ1B_HUMAN	Tyrosine-protein kinase BAZ1B OS=Homo sapiens GN=BAZ1B PE=1 SV=2	DHTVSGDEDYCPR	Carbamidomethyl (C);Phospho (ST)	57.021465@C:11,79.966332@T:3	1629.58	544.2	1629.58	544.2	0.0004	3	21.6	4	Elution from: 35.229 to 35.229 scan no 2927 cid35.00 polarity:+:MA10	35.229	0	26	K	S
BBS10_HUMAN	Bardet-Biedl syndrome 10 protein OS=Homo sapiens GN=BBS10 PE=1 SV=2	IEISYENLQVTNITR	Phospho (ST);Phospho (Y)	79.966332@T:14,79.966331@Y:5	1951.87	488.975	1951.87	488.975	0.001	4	28.1	0	Elution from: 26.811 to 26.811 scan no 1670 cid35.00 polarity:+:MA10:m1s	26.811	0	25	R	K
BCLF1_HUMAN	Bcl-2-associated transcription factor 1 OS=Homo sapiens GN=BCLAF1 PE=1 SV=2	FNDSEGDDTEETEDYR	Phospho (ST)	79.966331@S:4	2000.68	1001.35	2000.68	1001.35	0.0017	2	100.6	37.1	Elution from: 42.564 to 42.564 scan no 3851 cid35.00 polarity:+:MA10	42.564	0	25	K	Q
BCLF1_HUMAN	Bcl-2-associated transcription factor 1 OS=Homo sapiens GN=BCLAF1 PE=1 SV=2	FNDSEGDDTEETEDYR	Label:13C(6)15N(4) (R);Phospho (ST)	10.008269@R:16,79.966331@S:4	2010.69	1006.35	2010.69	1006.35	0.0019	2	90.1	37	Elution from: 42.004 to 42.004 scan no 3862 cid35.00 polarity:+:MA10	42.004	0	26	K	Q
BCLF1_HUMAN	Bcl-2-associated transcription factor 1 OS=Homo sapiens GN=BCLAF1 PE=1 SV=2	GRAEGEWEDQEALDYFSDK	Phospho (ST)	79.966331@S:17	2323.93	775.65	2323.93	775.65	0.0015	3	76.5	22.5	Elution from: 62.481 to 62.481 scan no 5922 cid35.00 polarity:+:MA10:m1s	62.481	1	25	K	E
BCLF1_HUMAN	Bcl-2-associated transcription factor 1 OS=Homo sapiens GN=BCLAF1 PE=1 SV=2	GRAEGEWEDQEALDYFSDKESGK	Phospho (ST)	79.966331@S:17	2725.12	909.381	2725.12	909.38	0.0018	3	74	16.6	Elution from: 58.941 to 58.941 scan no 5655 cid35.00 polarity:+:MA10:m1s	58.941	2	26	K	Q
BCLF1_HUMAN	Bcl-2-associated transcription factor 1 OS=Homo sapiens GN=BCLAF1 PE=1 SV=2	FNDSEGDDTEETEDYRQFRK	2 Phospho (ST)	79.966331@S:4,79.966332@T:9	2639.97	880.998	2639.97	880.997	0.0038	3	71.5	27	Elution from: 46.583 to 46.583 scan no 4346 cid35.00 polarity:+:MA10:m1s	46.583	2	26	K	S
BCLF1_HUMAN	Bcl-2-associated transcription factor 1 OS=Homo sapiens GN=BCLAF1 PE=1 SV=2	KAEGEPQEESPLK	2 Label:2H(4) (K);Phospho (ST)	4.025107@K:1,4.025107@K:13,79.966331@S:10	1528.73	765.371	1528.73	765.37	0.0012	2	71.4	59.5	Elution from: 30.419 to 30.419 scan no 2235 cid35.00 polarity:+:MA10	30.419	1	25	K	S
BCLF1_HUMAN	Bcl-2-associated transcription factor 1 OS=Homo sapiens GN=BCLAF1 PE=1 SV=2	GRAEGEWEDQEALDYFSDK	Label:13C(6)15N(4) (R);Label:2H(4) (K);Phospho (ST)	10.008269@R:2,4.025107@K:19,79.966331@S:17	2337.96	780.328	2337.96	780.327	0.003	3	71.2	21.2	Elution from: 62.803 to 62.803 scan no 5850 cid35.00 polarity:+:MA10:m1s	62.803	1	25	K	E
BCLF1_HUMAN	Bcl-2-associated transcription factor 1 OS=Homo sapiens GN=BCLAF1 PE=1 SV=2	FNDSEGDDTEETEDYRQFR	2 Phospho (ST)	79.966331@S:4,79.966332@T:9	2511.88	838.3	2511.87	838.299	0.0028	3	67.8	37.8	Elution from: 52.117 to 52.117 scan no 5006 cid35.00 polarity:+:MA10:m1s	52.117	1	26	K	K
BCLF1_HUMAN	Bcl-2-associated transcription factor 1 OS=Homo sapiens GN=BCLAF1 PE=1 SV=2	KAEGEPQEESPLK	Phospho (ST)	79.966331@S:10	1520.68	761.346	1520.68	761.345	0.0005	2	66.2	53.3	Elution from: 30.126 to 30.126 scan no 2189 cid35.00 polarity:+:MA10	30.126	1	25	K	S
BCLF1_HUMAN	Bcl-2-associated transcription factor 1 OS=Homo sapiens GN=BCLAF1 PE=1 SV=2	FNDSEGDDTEETEDYRQFR	Phospho (ST)	79.966331@S:4	2431.91	811.644	2431.91	811.643	0.003	3	65.3	35.1	Elution from: 49.722 to 49.722 scan no 4691 cid35.00 polarity:+:MA10:m1s	49.722	1	26	K	K
BCLF1_HUMAN	Bcl-2-associated transcription factor 1 OS=Homo sapiens GN=BCLAF1 PE=1 SV=2	NTPSQHSHSIQHSPER	Phospho (ST)	79.966331@S:13	1920.83	641.282	1920.82	641.282	0.0021	3	61.8	32.3	Elution from: 23.633 to 23.633 scan no 1285 cid35.00 polarity:+:MA10:m1s	23.633	0	25	K	S
BCLF1_HUMAN	Bcl-2-associated transcription factor 1 OS=Homo sapiens GN=BCLAF1 PE=1 SV=2	NTPSQHSHSIQHSPER	Phospho (ST)	79.966331@S:9	1920.82	961.419	1920.82	961.419	0.0013	2	61	12.1	Elution from: 23.778 to 23.778 scan no 1363 cid35.00 polarity:+:MA10	23.778	0	26	K	S
BCLF1_HUMAN	Bcl-2-associated transcription factor 1 OS=Homo sapiens GN=BCLAF1 PE=1 SV=2	FNDSEGDDTEETEDYR	Label:13C(6)15N(4) (R);2 Phospho (ST)	10.008269@R:16,79.966331@S:4,79.966332@T:9	2090.66	1046.34	2090.65	1046.33	0.0013	2	60.6	21.4	Elution from: 44.038 to 44.038 scan no 3907 cid35.00 polarity:+:MA10	44.038	0	25	K	Q
BCLF1_HUMAN	Bcl-2-associated transcription factor 1 OS=Homo sapiens GN=BCLAF1 PE=1 SV=2	QKFNDSEGDDTEETEDYRQFR	Phospho (ST)	79.966331@S:6	2688.06	897.028	2688.06	897.028	0.0017	3	59.3	44.1	Elution from: 45.837 to 45.837 scan no 4270 cid35.00 polarity:+:MA10:m1s	45.837	2	26	K	K
BCLF1_HUMAN	Bcl-2-associated transcription factor 1 OS=Homo sapiens GN=BCLAF1 PE=1 SV=2	DLFDYSPPLHK	Label:2H(4) (K);Phospho (ST)	4.025107@K:11,79.966331@S:6	1414.65	708.332	1414.65	708.331	0.0015	2	59.2	31.1	Elution from: 63.104 to 63.104 scan no 5880 cid35.00 polarity:+:MA10	63.104	0	25	K	N
BCLF1_HUMAN	Bcl-2-associated transcription factor 1 OS=Homo sapiens GN=BCLAF1 PE=1 SV=2	GRAEGEWEDQEALDYFSDKESGK	Phospho (ST)	79.966331@S:21	2725.12	682.287	2725.12	682.287	0.0015	4	56.8	5.2	Elution from: 59.184 to 59.184 scan no 5595 cid35.00 polarity:+:MA10:m1s	59.184	2	26	K	Q
BCLF1_HUMAN	Bcl-2-associated transcription factor 1 OS=Homo sapiens GN=BCLAF1 PE=1 SV=2	QKFNDSEGDDTEETEDYR	Phospho (ST)	79.966331@S:6	2256.83	753.285	2256.83	753.285	0.0016	3	56	32.8	Elution from: 38.825 to 38.825 scan no 3412 cid35.00 polarity:+:MA10:m1s	38.825	1	26	K	Q
BCLF1_HUMAN	Bcl-2-associated transcription factor 1 OS=Homo sapiens GN=BCLAF1 PE=1 SV=2	FNDSEGDDTEETEDYR	2 Phospho (ST)	79.966331@S:4,79.966332@T:9	2080.65	1041.33	2080.65	1041.33	0.0026	2	55.5	15.3	Elution from: 44.075 to 44.075 scan no 4009 cid35.00 polarity:+:MA10:m1s	44.075	0	25	K	Q
BCLF1_HUMAN	Bcl-2-associated transcription factor 1 OS=Homo sapiens GN=BCLAF1 PE=1 SV=2	DLFDYSPPLHK	Phospho (ST)	79.966331@S:6	1410.62	706.319	1410.62	706.318	0.0009	2	55.4	30.1	Elution from: 63.438 to 63.438 scan no 5936 cid35.00 polarity:+:MA10	63.438	0	25	K	N
BCLF1_HUMAN	Bcl-2-associated transcription factor 1 OS=Homo sapiens GN=BCLAF1 PE=1 SV=2	GRAEGEWEDQEALDYFSDKESGK	Phospho (Y)	79.966331@Y:15	2725.12	682.287	2725.12	682.287	0.0022	4	52.5	4.4	Elution from: 58.829 to 58.829 scan no 5568 cid35.00 polarity:+:MA10:m1s	58.829	2	26	K	Q
BCLF1_HUMAN	Bcl-2-associated transcription factor 1 OS=Homo sapiens GN=BCLAF1 PE=1 SV=2	IDISPSTLR	Label:13C(6)15N(4) (R);Phospho (ST)	10.008269@R:9,79.966331@S:4	1090.53	546.272	1090.53	546.272	0.0002	2	50.5	17.4	Elution from: 53.282 to 53.282 scan no 5047 cid35.00 polarity:+:MA10	53.282	0	25	R	K
BCLF1_HUMAN	Bcl-2-associated transcription factor 1 OS=Homo sapiens GN=BCLAF1 PE=1 SV=2	FNDSEGDDTEETEDYRQFRK	2 Phospho (ST)	79.966331@S:4,79.966332@T:12	2639.97	880.997	2639.97	880.997	0.0013	3	49.1	3.8	Elution from: 46.200 to 46.200 scan no 4338 cid35.00 polarity:+:MA10:m1s	46.2	2	26	K	S
BCLF1_HUMAN	Bcl-2-associated transcription factor 1 OS=Homo sapiens GN=BCLAF1 PE=1 SV=2	FNDSEGDDTEETEDYRQFR	2 Label:13C(6)15N(4) (R);Phospho (ST)	10.008269@R:16,10.008269@R:19,79.966331@S:4	2451.93	818.317	2451.92	818.315	0.0033	3	49	29	Elution from: 49.523 to 49.523 scan no 4661 cid35.00 polarity:+:MA10:m1s	49.523	1	25	K	K
BCLF1_HUMAN	Bcl-2-associated transcription factor 1 OS=Homo sapiens GN=BCLAF1 PE=1 SV=2	QKFNDSEGDDTEETEDYR	Label:13C(6)15N(4) (R);Label:2H(4) (K);Phospho (ST)	10.008269@R:18,4.025107@K:2,79.966331@S:6	2270.87	757.963	2270.87	757.963	0.0006	3	48.6	30.9	Elution from: 38.897 to 38.897 scan no 3299 cid35.00 polarity:+:MA10:m1s	38.897	1	25	K	Q
BCLF1_HUMAN	Bcl-2-associated transcription factor 1 OS=Homo sapiens GN=BCLAF1 PE=1 SV=2	GRAEGEWEDQEALDYFSDKESGK	Label:13C(6)15N(4) (R);2 Label:2H(4) (K);Phospho (ST)	10.008269@R:2,4.025107@K:19,4.025107@K:23,79.966331@S:17	2743.18	915.4	2743.18	915.399	0.0017	3	47.5	10.8	Elution from: 59.126 to 59.126 scan no 5541 cid35.00 polarity:+:MA10	59.126	2	26	K	Q
BCLF1_HUMAN	Bcl-2-associated transcription factor 1 OS=Homo sapiens GN=BCLAF1 PE=1 SV=2	FNDSEGDDTEETEDYRQFRK	Phospho (ST)	79.966331@S:4	2560	641.008	2560	641.008	0.0002	4	46.7	19.3	Elution from: 44.741 to 44.741 scan no 4135 cid35.00 polarity:+:MA10:m1s	44.741	2	26	K	S
BCLF1_HUMAN	Bcl-2-associated transcription factor 1 OS=Homo sapiens GN=BCLAF1 PE=1 SV=2	NTPSQHSHSIQHSPER	Label:13C(6)15N(4) (R);Phospho (ST)	10.008269@R:16,79.966331@S:13	1930.83	644.618	1930.83	644.618	0.0013	3	46.7	15	Elution from: 24.111 to 24.111 scan no 1317 cid35.00 polarity:+:MA10	24.111	0	25	K	S
BCLF1_HUMAN	Bcl-2-associated transcription factor 1 OS=Homo sapiens GN=BCLAF1 PE=1 SV=2	IDISPSTLR	Phospho (ST)	79.966331@S:4	1080.52	541.268	1080.52	541.268	0	2	45.6	7.7	Elution from: 52.877 to 52.877 scan no 5024 cid35.00 polarity:+:MA10	52.877	0	26	R	K
BCLF1_HUMAN	Bcl-2-associated transcription factor 1 OS=Homo sapiens GN=BCLAF1 PE=1 SV=2	SKSQEEPKDTFEHDPSESIDEFNK	Phospho (ST)	79.966331@S:3	2902.22	726.562	2902.22	726.562	0.0016	4	43.4	5.5	Elution from: 49.646 to 49.646 scan no 4753 cid35.00 polarity:+:MA10:m1s	49.646	2	26	K	S
BCLF1_HUMAN	Bcl-2-associated transcription factor 1 OS=Homo sapiens GN=BCLAF1 PE=1 SV=2	QKFNDSEGDDTEETEDYRQFR	2 Phospho (ST)	79.966331@S:6,79.966332@T:11	2768.03	923.684	2768.03	923.683	0.0031	3	39.8	22.2	Elution from: 47.928 to 47.928 scan no 4572 cid35.00 polarity:+:MA10:m1s	47.928	2	26	K	K
BCLF1_HUMAN	Bcl-2-associated transcription factor 1 OS=Homo sapiens GN=BCLAF1 PE=1 SV=2	GRAEGEWEDQEALDYFSDKESGK	Label:13C(6)15N(4) (R);2 Label:2H(4) (K);Phospho (Y)	10.008269@R:2,4.025107@K:19,4.025107@K:23,79.966331@Y:15	2743.18	686.802	2743.18	686.801	0.0031	4	37.6	5.1	Elution from: 59.159 to 59.159 scan no 5545 cid35.00 polarity:+:MA10:m1s	59.159	2	26	K	Q
BCLF1_HUMAN	Bcl-2-associated transcription factor 1 OS=Homo sapiens GN=BCLAF1 PE=1 SV=2	STFREESPLR	Phospho (ST)	79.966331@S:7	1300.58	651.298	1300.58	651.298	0.0007	2	35.2	24.1	Elution from: 36.598 to 36.598 scan no 3147 cid35.00 polarity:+:MA10	36.598	1	26	K	I
BCLF1_HUMAN	Bcl-2-associated transcription factor 1 OS=Homo sapiens GN=BCLAF1 PE=1 SV=2	QKFNDSEGDDTEETEDYR	Label:13C(6)15N(4) (R);Label:2H(4) (K);2 Phospho (ST)	10.008269@R:18,4.025107@K:2,79.966331@S:6,79.966332@T:11	2350.83	784.619	2350.83	784.618	0.0008	3	33.5	12.7	Elution from: 40.473 to 40.473 scan no 3575 cid35.00 polarity:+:MA10:m1s	40.473	1	25	K	Q
BCLF1_HUMAN	Bcl-2-associated transcription factor 1 OS=Homo sapiens GN=BCLAF1 PE=1 SV=2	SKSQEEPKDTFEHDPSESIDEFNK	Phospho (ST)	79.966331@S:1	2902.22	726.562	2902.22	726.562	0.0023	4	33.4	5	Elution from: 50.050 to 50.050 scan no 4725 cid35.00 polarity:+:MA10:m1s	50.05	2	25	K	S
BCLF1_HUMAN	Bcl-2-associated transcription factor 1 OS=Homo sapiens GN=BCLAF1 PE=1 SV=2	FNDSEGDDTEETEDYRQFR	2 Label:13C(6)15N(4) (R);2 Phospho (ST)	10.008269@R:16,10.008269@R:19,79.966331@S:4,79.966332@T:9	2531.89	844.971	2531.89	844.971	0.0021	3	32.7	8.2	Elution from: 52.274 to 52.274 scan no 4898 cid35.00 polarity:+:MA10:m1s	52.274	1	26	K	K
BCLF1_HUMAN	Bcl-2-associated transcription factor 1 OS=Homo sapiens GN=BCLAF1 PE=1 SV=2	IDISPSTLRK	Phospho (ST)	79.966331@S:4	1208.62	605.316	1208.62	605.316	0.0007	2	32.7	4	Elution from: 45.539 to 45.539 scan no 4273 cid35.00 polarity:+:MA10	45.539	1	26	R	H
BCLF1_HUMAN	Bcl-2-associated transcription factor 1 OS=Homo sapiens GN=BCLAF1 PE=1 SV=2	STFREESPLR	2 Label:13C(6)15N(4) (R);Phospho (ST)	10.008269@R:4,10.008269@R:10,79.966331@S:7	1320.6	661.307	1320.6	661.306	0.0009	2	30.1	7.9	Elution from: 36.782 to 36.782 scan no 3014 cid35.00 polarity:+:MA10	36.782	1	26	K	I
BCLF1_HUMAN	Bcl-2-associated transcription factor 1 OS=Homo sapiens GN=BCLAF1 PE=1 SV=2	IDISPSTLRK	Label:13C(6)15N(4) (R);Label:2H(4) (K);Phospho (ST)	10.008269@R:9,4.025107@K:10,79.966331@S:4	1222.65	408.557	1222.65	408.557	-0.0001	3	29.8	15.5	Elution from: 45.702 to 45.702 scan no 4291 cid35.00 polarity:+:MA10	45.702	1	26	R	H
BCLF1_HUMAN	Bcl-2-associated transcription factor 1 OS=Homo sapiens GN=BCLAF1 PE=1 SV=2	SGSSPKWTHDK	2 Label:2H(4) (K);Phospho (ST)	4.025107@K:6,4.025107@K:11,79.966331@S:3	1316.6	439.874	1316.6	439.874	-0.0004	3	29.6	6	Elution from: 26.427 to 26.427 scan no 1621 cid35.00 polarity:+:MA10	26.427	1	25	K	Y
BCLF1_HUMAN	Bcl-2-associated transcription factor 1 OS=Homo sapiens GN=BCLAF1 PE=1 SV=2	IDISPSTLRK	Phospho (ST)	79.966332@T:7	1208.62	605.316	1208.62	605.316	0.0004	2	29.5	4.2	Elution from: 45.809 to 45.809 scan no 4325 cid35.00 polarity:+:MA10	45.809	1	26	R	H
BCLF1_HUMAN	Bcl-2-associated transcription factor 1 OS=Homo sapiens GN=BCLAF1 PE=1 SV=2	RIDISPSTLR	2 Label:13C(6)15N(4) (R);Phospho (ST)	10.008269@R:1,10.008269@R:10,79.966331@S:5	1256.64	629.326	1256.64	629.327	-0.0015	2	28.9	9	Elution from: 48.535 to 48.535 scan no 4490 cid35.00 polarity:+:MA10	48.535	1	25	R	K
BCLF1_HUMAN	Bcl-2-associated transcription factor 1 OS=Homo sapiens GN=BCLAF1 PE=1 SV=2	SGSSPKWTHDK	Phospho (ST)	79.966331@S:3	1308.55	437.191	1308.55	437.191	0.0006	3	27.8	4.2	Elution from: 26.432 to 26.432 scan no 1697 cid35.00 polarity:+:MA10	26.432	1	26	K	Y
BCOR_HUMAN	BCL-6 corepressor OS=Homo sapiens GN=BCOR PE=1 SV=1	ADHMKKMAPTVLVHSR	2 Oxidation (M);2 Phospho (ST)	15.994915@M:4,15.994915@M:7,79.966332@T:10,79.966331@S:15	2011.87	503.976	2011.88	503.977	-0.004	4	27.7	9.4	Elution from: 21.155 to 21.155 scan no 1023 cid35.00 polarity:+:MA10:m1s	21.155	2	25	K	A
BD1L1_HUMAN	Biorientation of chromosomes in cell division protein 1-like 1 OS=Homo sapiens GN=BOD1L1 PE=1 SV=2	TDTGIVTVEQSPSSSK	Phospho (ST)	79.966331@S:11	1714.77	858.391	1714.77	858.39	0.0011	2	63.5	4.7	Elution from: 41.197 to 41.197 scan no 3777 cid35.00 polarity:+:MA10	41.197	0	26	K	L
BD1L1_HUMAN	Biorientation of chromosomes in cell division protein 1-like 1 OS=Homo sapiens GN=BOD1L1 PE=1 SV=2	YYSDSDDELTVEQR	2 Phospho (ST)	79.966331@S:3,79.966331@S:5	1878.66	940.338	1878.66	940.337	0.001	2	61.6	7.1	Elution from: 52.778 to 52.778 scan no 5012 cid35.00 polarity:+:MA10:m1s	52.778	0	26	K	R
BD1L1_HUMAN	Biorientation of chromosomes in cell division protein 1-like 1 OS=Homo sapiens GN=BOD1L1 PE=1 SV=2	YYSDSDDELTVEQR	Phospho (ST);Phospho (Y)	79.966331@S:5,79.966331@Y:2	1878.66	940.338	1878.66	940.337	0.001	2	59.5	0	Elution from: 52.814 to 52.814 scan no 4911 cid35.00 polarity:+:MA10:m1s	52.814	0	26	K	R
BD1L1_HUMAN	Biorientation of chromosomes in cell division protein 1-like 1 OS=Homo sapiens GN=BOD1L1 PE=1 SV=2	QHYLSSEDEPDDNPDVLDSR	Phospho (ST);Phospho (Y)	79.966331@S:6,79.966331@Y:3	2489.93	830.983	2489.93	830.983	0.0015	3	44.1	0	Elution from: 55.209 to 55.209 scan no 5126 cid35.00 polarity:+:MA10:m1s	55.209	0	26	K	I
BD1L1_HUMAN	Biorientation of chromosomes in cell division protein 1-like 1 OS=Homo sapiens GN=BOD1L1 PE=1 SV=2	DKDVTLSPVK	Phospho (ST)	79.966331@S:7	1180.57	591.294	1180.57	591.294	0.0003	2	41.5	6.9	Elution from: 35.914 to 35.914 scan no 3008 cid35.00 polarity:+:MA10	35.914	1	26	K	A
BD1L1_HUMAN	Biorientation of chromosomes in cell division protein 1-like 1 OS=Homo sapiens GN=BOD1L1 PE=1 SV=2	YYSDSDDELTVEQR	Label:13C(6)15N(4) (R);Phospho (ST);Phospho (Y)	10.008269@R:14,79.966331@S:5,79.966331@Y:2	1888.67	945.342	1888.67	945.341	0.001	2	40.5	0	Elution from: 52.837 to 52.837 scan no 4934 cid35.00 polarity:+:MA10:m1s	52.837	0	25	K	R
BD1L1_HUMAN	Biorientation of chromosomes in cell division protein 1-like 1 OS=Homo sapiens GN=BOD1L1 PE=1 SV=2	QHYLSSEDEPDDNPDVLDSR	Phospho (ST);Phospho (Y)	79.966331@S:5,79.966331@Y:3	2489.93	830.984	2489.93	830.983	0.0037	3	38.2	5.2	Elution from: 55.267 to 55.267 scan no 5231 cid35.00 polarity:+:MA10:m1s	55.267	0	26	K	I
BD1L1_HUMAN	Biorientation of chromosomes in cell division protein 1-like 1 OS=Homo sapiens GN=BOD1L1 PE=1 SV=2	DKDVTLSPVK	2 Label:2H(4) (K);Phospho (ST)	4.025107@K:2,4.025107@K:10,79.966331@S:7	1188.63	595.32	1188.62	595.319	0.0009	2	35.9	10.2	Elution from: 36.035 to 36.035 scan no 2928 cid35.00 polarity:+:MA10	36.035	1	26	K	A
BD1L1_HUMAN	Biorientation of chromosomes in cell division protein 1-like 1 OS=Homo sapiens GN=BOD1L1 PE=1 SV=2	DKDVTLSPVK	2 Label:2H(4) (K);Phospho (ST)	4.025107@K:2,4.025107@K:10,79.966332@T:5	1188.62	595.32	1188.62	595.319	0.0005	2	33.5	4.4	Elution from: 35.604 to 35.604 scan no 2981 cid35.00 polarity:+:MA10	35.604	1	26	K	A
BD1L1_HUMAN	Biorientation of chromosomes in cell division protein 1-like 1 OS=Homo sapiens GN=BOD1L1 PE=1 SV=2	TQLSPSIK	Phospho (ST)	79.966331@S:4	952.463	477.239	952.463	477.239	-0.0003	2	26.6	5.1	Elution from: 36.725 to 36.725 scan no 3166 cid35.00 polarity:+:MA10	36.725	0	26	K	R
BD1L1_HUMAN	Biorientation of chromosomes in cell division protein 1-like 1 OS=Homo sapiens GN=BOD1L1 PE=1 SV=2	DVTLSPVK	Phospho (ST)	79.966331@S:5	937.452	469.733	937.452	469.733	0.0003	2	23.8	11.7	Elution from: 41.979 to 41.979 scan no 3730 cid35.00 polarity:+:MA10	41.979	0	26	K	A
BET1L_HUMAN	BET1-like protein OS=Homo sapiens GN=BET1L PE=1 SV=1	AQSPGAVEEILDRENK	Label:13C(6)15N(4) (R);Label:2H(4) (K);Phospho (ST)	10.008269@R:13,4.025107@K:16,79.966331@S:3	1848.88	617.301	1848.88	617.3	0.0014	3	35.2	27	Elution from: 56.971 to 56.971 scan no 5393 cid35.00 polarity:+:MA10:m1s	56.971	1	25	R	R
BICD2_HUMAN	Protein bicaudal D homolog 2 OS=Homo sapiens GN=BICD2 PE=1 SV=1	GRRSPILLPK	Phospho (ST)	79.966331@S:4	1215.69	406.236	1215.69	406.236	0.0002	3	28.9	6.7	Elution from: 35.377 to 35.377 scan no 2969 cid35.00 polarity:+:MA10:m1s	35.377	2	26	R	G
BICD2_HUMAN	Protein bicaudal D homolog 2 OS=Homo sapiens GN=BICD2 PE=1 SV=1	GRRSPILLPK	2 Label:13C(6)15N(4) (R);Label:2H(4) (K);Phospho (ST)	10.008269@R:2,10.008269@R:3,4.025107@K:10,79.966331@S:4	1239.73	414.249	1239.73	414.25	-0.0006	3	25.9	17.3	Elution from: 35.441 to 35.441 scan no 2978 cid35.00 polarity:+:MA10	35.441	2	26	R	G
BIG2_HUMAN	Brefeldin A-inhibited guanine nucleotide-exchange protein 2 OS=Homo sapiens GN=ARFGEF2 PE=1 SV=3	GSSLSGTDDGAQEVVK	Label:2H(4) (K);Phospho (ST)	4.025107@K:16,79.966331@S:3	1632.72	817.367	1632.72	817.366	0.0012	2	61.6	2.5	Elution from: 40.600 to 40.600 scan no 3559 cid35.00 polarity:+:MA10	40.6	0	26	R	D
BOP1_HUMAN	Ribosome biogenesis protein BOP1 OS=Homo sapiens GN=BOP1 PE=1 SV=2	IGDEYAEDSSDEEDIR	2 Phospho (ST)	79.966331@S:9,79.966331@S:10	2001.68	1001.85	2001.68	1001.85	0.0012	2	58.3	30.7	Elution from: 48.856 to 48.856 scan no 4600 cid35.00 polarity:+:MA10	48.856	0	25	R	N
BOP1_HUMAN	Ribosome biogenesis protein BOP1 OS=Homo sapiens GN=BOP1 PE=1 SV=2	IGDEYAEDSSDEEDIR	Label:13C(6)15N(4) (R);2 Phospho (ST)	10.008269@R:16,79.966331@S:9,79.966331@S:10	2011.69	1006.85	2011.68	1006.85	0.003	2	54.6	35.3	Elution from: 48.761 to 48.761 scan no 4515 cid35.00 polarity:+:MA10:m1s	48.761	0	25	R	N
BORG5_HUMAN	Cdc42 effector protein 1 OS=Homo sapiens GN=CDC42EP1 PE=1 SV=1	RSDSLLSFR	Phospho (ST)	79.966331@S:4	1159.54	580.777	1159.54	580.777	0.001	2	45.3	20	Elution from: 52.309 to 52.309 scan no 4958 cid35.00 polarity:+:MA10	52.309	1	26	R	L
BORG5_HUMAN	Cdc42 effector protein 1 OS=Homo sapiens GN=CDC42EP1 PE=1 SV=1	ASWESLDEEWRAPQAGSR	2 Phospho (ST)	79.966331@S:2,79.966331@S:5	2233.88	745.635	2233.88	745.635	0.0011	3	38.2	26	Elution from: 67.341 to 67.341 scan no 6380 cid35.00 polarity:+:MA10:m1s	67.341	1	26	R	T
BRD1_HUMAN	Bromodomain-containing protein 1 OS=Homo sapiens GN=BRD1 PE=1 SV=1	VHGEPTSDLSDID	2 Phospho (ST)	79.966331@S:7,79.966331@S:10	1543.55	772.782	1543.55	772.781	0.0015	2	36.3	9.3	Elution from: 52.077 to 52.077 scan no 4848 cid35.00 polarity:+:MA10	52.077	0	25	R	-
BRD1_HUMAN	Bromodomain-containing protein 1 OS=Homo sapiens GN=BRD1 PE=1 SV=1	VHGEPTSDLSDID	2 Phospho (ST)	79.966332@T:6,79.966331@S:10	1543.55	772.782	1543.55	772.781	0.0003	2	23.7	1.1	Elution from: 52.186 to 52.186 scan no 4889 cid35.00 polarity:+:MA10	52.186	0	26	R	-
BRD3_HUMAN	Bromodomain-containing protein 3 OS=Homo sapiens GN=BRD3 PE=1 SV=1	SESPPPLSDPK	Phospho (ST)	79.966331@S:3	1232.53	617.274	1232.53	617.274	0.0001	2	41.5	3.3	Elution from: 36.464 to 36.464 scan no 3126 cid35.00 polarity:+:MA10	36.464	0	26	R	Q
BRD3_HUMAN	Bromodomain-containing protein 3 OS=Homo sapiens GN=BRD3 PE=1 SV=1	SESPPPLSDPK	Label:2H(4) (K);Phospho (ST)	4.025107@K:11,79.966331@S:3	1236.56	619.286	1236.56	619.286	0	2	26.9	1.3	Elution from: 36.685 to 36.685 scan no 3021 cid35.00 polarity:+:MA10	36.685	0	26	R	Q
BRD4_HUMAN	Bromodomain-containing protein 4 OS=Homo sapiens GN=BRD4 PE=1 SV=2	SKPPPTYESEEEDK	Phospho (ST)	79.966331@S:9	1714.7	858.356	1714.7	858.356	0.0004	2	48.8	7.8	Elution from: 29.975 to 29.975 scan no 2180 cid35.00 polarity:+:MA10	29.975	0	26	K	C
BRD4_HUMAN	Bromodomain-containing protein 4 OS=Homo sapiens GN=BRD4 PE=1 SV=2	IHSPIIR	Phospho (ST)	79.966331@S:3	914.474	458.244	914.474	458.244	0.0003	2	36.5	23.2	Elution from: 31.569 to 31.569 scan no 2422 cid35.00 polarity:+:MA10	31.569	0	26	K	S
BRD4_HUMAN	Bromodomain-containing protein 4 OS=Homo sapiens GN=BRD4 PE=1 SV=2	SKPPPTYESEEEDK	2 Label:2H(4) (K);Phospho (ST)	4.025107@K:2,4.025107@K:14,79.966331@S:9	1722.75	575.256	1722.75	575.257	0	3	30.1	13.7	Elution from: 30.060 to 30.060 scan no 2098 cid35.00 polarity:+:MA10	30.06	0	25	K	C
BRE1A_HUMAN	E3 ubiquitin-protein ligase BRE1A OS=Homo sapiens GN=RNF20 PE=1 SV=2	ALVVPEPEPDSDSNQER	Phospho (ST)	79.966331@S:13	1960.84	981.429	1960.84	981.428	0.0028	2	84.3	23.3	Elution from: 49.467 to 49.467 scan no 4665 cid35.00 polarity:+:MA10:m1s	49.467	0	26	K	K
BRE1A_HUMAN	E3 ubiquitin-protein ligase BRE1A OS=Homo sapiens GN=RNF20 PE=1 SV=2	ALVVPEPEPDSDSNQER	Label:13C(6)15N(4) (R);Phospho (ST)	10.008269@R:17,79.966331@S:13	1970.85	986.433	1970.85	986.432	0.0023	2	46.7	8.5	Elution from: 49.369 to 49.369 scan no 4642 cid35.00 polarity:+:MA10:m1s	49.369	0	25	K	K
BRPF1_HUMAN	Peregrin OS=Homo sapiens GN=BRPF1 PE=1 SV=2	RLPALSHSEGEEDEDEEEDEGK	2 Phospho (ST)	79.966331@S:6,79.966331@S:8	2658.99	887.336	2658.98	887.336	0.0019	3	70.2	62.1	Elution from: 42.682 to 42.682 scan no 3923 cid35.00 polarity:+:MA10:m1s	42.682	1	26	R	G
BUD13_HUMAN	BUD13 homolog OS=Homo sapiens GN=BUD13 PE=1 SV=1	HDTPDPSPLR	Label:13C(6)15N(4) (R);2 Phospho (ST)	10.008269@R:10,79.966332@T:3,79.966331@S:7	1303.49	652.752	1303.49	652.751	0.0011	2	24	18.4	Elution from: 34.312 to 34.312 scan no 2669 cid35.00 polarity:+:MA10	34.312	0	26	R	G
BUD13_HUMAN	BUD13 homolog OS=Homo sapiens GN=BUD13 PE=1 SV=1	HFRHDTPDSSPR	2 Phospho (ST)	79.966332@T:6,79.966331@S:9	1610.6	537.875	1610.6	537.875	0.0008	3	22.9	2	Elution from: 25.042 to 25.042 scan no 1486 cid35.00 polarity:+:MA10	25.042	1	25	R	R
BYST_HUMAN	Bystin OS=Homo sapiens GN=BYSL PE=1 SV=3	MPQDGSDDEDEEWPTLEK	Oxidation (M);Phospho (ST)	15.994915@M:1,79.966331@S:6	2215.82	1108.92	2215.81	1108.91	0.0026	2	79	61.7	Elution from: 58.342 to 58.342 scan no 5509 cid35.00 polarity:+:MA10:m1s	58.342	0	25	R	A
BYST_HUMAN	Bystin OS=Homo sapiens GN=BYSL PE=1 SV=3	MPQDGSDDEDEEWPTLEK	Label:2H(4) (K);Oxidation (M);Phospho (ST)	4.025107@K:18,15.994915@M:1,79.966331@S:6	2219.84	1110.93	2219.84	1110.93	0.0015	2	74.8	62.9	Elution from: 58.100 to 58.100 scan no 5427 cid35.00 polarity:+:MA10:m1s	58.1	0	25	R	A
BZW2_HUMAN	Basic leucine zipper and W2 domain-containing protein 2 OS=Homo sapiens GN=BZW2 PE=1 SV=1	FVEWLQNAEEESESEGEEN	2 Phospho (ST)	79.966331@S:12,79.966331@S:14	2413.85	1207.93	2413.85	1207.93	0.0022	2	82	72.8	Elution from: 77.815 to 77.815 scan no 7043 cid35.00 polarity:+:MA10:m1s	77.815	0	26	K	-
BZW2_HUMAN	Basic leucine zipper and W2 domain-containing protein 2 OS=Homo sapiens GN=BZW2 PE=1 SV=1	KFVEWLQNAEEESESEGEEN	Label:2H(4) (K);2 Phospho (ST)	4.025107@K:1,79.966331@S:13,79.966331@S:15	2545.97	1273.99	2545.97	1273.99	0.0026	2	64.7	39.7	Elution from: 71.400 to 71.400 scan no 6519 cid35.00 polarity:+:MA10:m1s	71.4	1	25	K	-
BZW2_HUMAN	Basic leucine zipper and W2 domain-containing protein 2 OS=Homo sapiens GN=BZW2 PE=1 SV=1	KFVEWLQNAEEESESEGEEN	2 Phospho (ST)	79.966331@S:13,79.966331@S:15	2541.95	1271.98	2541.95	1271.98	0.0003	2	60.8	57.2	Elution from: 71.152 to 71.152 scan no 6595 cid35.00 polarity:+:MA10:m1s	71.152	1	26	K	-
C1QT5_HUMAN	Complement C1q tumor necrosis factor-related protein 5 OS=Homo sapiens GN=C1QTNF5 PE=1 SV=1	SESRVPPPSDAPLPFDR	Label:13C(6)15N(4) (R);Phospho (ST)	10.008269@R:17,79.966331@S:3	1955.9	489.983	1955.9	489.983	0.0031	4	35.1	0	Elution from: 23.519 to 23.519 scan no 1292 cid35.00 polarity:+:MA10	23.519	1	25	R	V
CAF1B_HUMAN	Chromatin assembly factor 1 subunit B OS=Homo sapiens GN=CHAF1B PE=1 SV=1	GSSPGPRPVEGTPASR	Phospho (ST)	79.966331@S:3	1630.75	544.59	1630.75	544.589	0.0009	3	53.1	9.1	Elution from: 30.321 to 30.321 scan no 2158 cid35.00 polarity:+:MA10	30.321	0	25	R	T
CAF1B_HUMAN	Chromatin assembly factor 1 subunit B OS=Homo sapiens GN=CHAF1B PE=1 SV=1	GSSPGPRPVEGTPASR	2 Label:13C(6)15N(4) (R);Phospho (ST)	10.008269@R:7,10.008269@R:16,79.966331@S:3	1650.76	551.261	1650.76	551.262	-0.0003	3	45.5	0	Elution from: 30.406 to 30.406 scan no 2143 cid35.00 polarity:+:MA10	30.406	0	26	R	T
CAF1B_HUMAN	Chromatin assembly factor 1 subunit B OS=Homo sapiens GN=CHAF1B PE=1 SV=1	TQDPSSPGTTPPQAR	Phospho (ST)	79.966331@S:6	1618.7	810.357	1618.7	810.357	0.0009	2	44.3	10.3	Elution from: 30.076 to 30.076 scan no 2221 cid35.00 polarity:+:MA10	30.076	0	26	R	Q
CAF1B_HUMAN	Chromatin assembly factor 1 subunit B OS=Homo sapiens GN=CHAF1B PE=1 SV=1	TQDPSSPGTTPPQAR	2 Phospho (ST)	79.966331@S:6,79.966332@T:10	1698.67	850.34	1698.67	850.34	0.0003	2	39.3	0.3	Elution from: 31.547 to 31.547 scan no 2419 cid35.00 polarity:+:MA10	31.547	0	26	R	Q
CAF1B_HUMAN	Chromatin assembly factor 1 subunit B OS=Homo sapiens GN=CHAF1B PE=1 SV=1	GSSPGPRPVEGTPASR	Phospho (ST)	79.966331@S:2	1630.75	544.59	1630.75	544.589	0.0011	3	37.8	2.6	Elution from: 30.318 to 30.318 scan no 2257 cid35.00 polarity:+:MA10	30.318	0	26	R	T
CALX_HUMAN	Calnexin OS=Homo sapiens GN=CANX PE=1 SV=2	QKSDAEEDGGTVSQEEEDRKPK	2 Phospho (ST)	79.966331@S:3,79.966331@S:13	2621.05	874.692	2621.05	874.692	0.0016	3	71.1	25.2	Elution from: 30.116 to 30.116 scan no 2205 cid35.00 polarity:+:MA10:m1s	30.116	2	26	K	A
CALX_HUMAN	Calnexin OS=Homo sapiens GN=CANX PE=1 SV=2	QKSDAEEDGGTVSQEEEDRKPK	Label:13C(6)15N(4) (R);3 Label:2H(4) (K);2 Phospho (ST)	10.008269@R:19,4.025107@K:2,4.025107@K:20,4.025107@K:22,79.966331@S:3,79.966331@S:13	2643.14	882.053	2643.14	882.053	0.0012	3	69.3	13.9	Elution from: 30.781 to 30.781 scan no 2223 cid35.00 polarity:+:MA10:m1s	30.781	2	25	K	A
CALX_HUMAN	Calnexin OS=Homo sapiens GN=CANX PE=1 SV=2	QKSDAEEDGGTVSQEEEDRKPK	Phospho (ST)	79.966331@S:13	2541.09	848.036	2541.09	848.036	-0.0003	3	68.7	19.5	Elution from: 29.119 to 29.119 scan no 2085 cid35.00 polarity:+:MA10:m1s	29.119	2	26	K	A
CALX_HUMAN	Calnexin OS=Homo sapiens GN=CANX PE=1 SV=2	SDAEEDGGTVSQEEEDRKPK	Phospho (ST)	79.966331@S:11	2284.94	762.652	2284.93	762.652	0.0021	3	66.6	23.1	Elution from: 31.022 to 31.022 scan no 2322 cid35.00 polarity:+:MA10:m1s	31.022	1	26	K	A
CALX_HUMAN	Calnexin OS=Homo sapiens GN=CANX PE=1 SV=2	QKSDAEEDGGTVSQEEEDRKPK	Phospho (ST)	79.966331@S:3	2541.09	848.037	2541.09	848.036	0.002	3	62.9	48.7	Elution from: 29.318 to 29.318 scan no 2092 cid35.00 polarity:+:MA10:m1s	29.318	2	26	K	A
CALX_HUMAN	Calnexin OS=Homo sapiens GN=CANX PE=1 SV=2	SDAEEDGGTVSQEEEDRKPK	Phospho (ST)	79.966332@T:9	2284.93	762.652	2284.93	762.652	0.0007	3	59.3	1.3	Elution from: 31.074 to 31.074 scan no 2351 cid35.00 polarity:+:MA10:m1s	31.074	1	26	K	A
CALX_HUMAN	Calnexin OS=Homo sapiens GN=CANX PE=1 SV=2	QKSDAEEDGGTVSQEEEDR	Phospho (ST)	79.966331@S:3	2187.85	730.289	2187.84	730.289	0.0016	3	58.2	39.6	Elution from: 31.350 to 31.350 scan no 2370 cid35.00 polarity:+:MA10:m1s	31.35	1	26	K	K
CALX_HUMAN	Calnexin OS=Homo sapiens GN=CANX PE=1 SV=2	QKSDAEEDGGTVSQEEEDRKPK	Label:13C(6)15N(4) (R);3 Label:2H(4) (K);Phospho (ST)	10.008269@R:19,4.025107@K:2,4.025107@K:20,4.025107@K:22,79.966331@S:3	2563.17	855.398	2563.17	855.397	0.0007	3	57.9	36.2	Elution from: 29.512 to 29.512 scan no 2117 cid35.00 polarity:+:MA10:m1s	29.512	2	26	K	A
CALX_HUMAN	Calnexin OS=Homo sapiens GN=CANX PE=1 SV=2	QKSDAEEDGGTVSQEEEDR	Label:13C(6)15N(4) (R);Label:2H(4) (K);Phospho (ST)	10.008269@R:19,4.025107@K:2,79.966331@S:3	2201.88	734.967	2201.88	734.966	0.0004	3	57.3	42.5	Elution from: 31.593 to 31.593 scan no 2299 cid35.00 polarity:+:MA10:m1s	31.593	1	26	K	K
CALX_HUMAN	Calnexin OS=Homo sapiens GN=CANX PE=1 SV=2	AEEDEILNRSPR	2 Label:13C(6)15N(4) (R);Phospho (ST)	10.008269@R:9,10.008269@R:12,79.966331@S:10	1527.68	510.235	1527.68	510.235	0.0005	3	47.9	38.1	Elution from: 39.996 to 39.996 scan no 3438 cid35.00 polarity:+:MA10	39.996	1	25	K	N
CALX_HUMAN	Calnexin OS=Homo sapiens GN=CANX PE=1 SV=2	AEEDEILNRSPR	Phospho (ST)	79.966331@S:10	1507.67	503.563	1507.67	503.563	0.0005	3	39.3	28.9	Elution from: 40.249 to 40.249 scan no 3608 cid35.00 polarity:+:MA10	40.249	1	26	K	N
CALX_HUMAN	Calnexin OS=Homo sapiens GN=CANX PE=1 SV=2	QKSDAEEDGGTVSQEEEDRKPK	2 Phospho (ST)	79.966331@S:3,79.966332@T:11	2621.06	656.271	2621.05	656.271	0.002	4	35.3	0.6	Elution from: 30.512 to 30.512 scan no 2249 cid35.00 polarity:+:MA10:m1s	30.512	2	26	K	A
CALX_HUMAN	Calnexin OS=Homo sapiens GN=CANX PE=1 SV=2	QKSDAEEDGGTVSQEEEDRKPK	Phospho (ST)	79.966332@T:11	2541.09	848.036	2541.09	848.036	-0.0008	3	34.6	8.5	Elution from: 28.915 to 28.915 scan no 2034 cid35.00 polarity:+:MA10:m1s	28.915	2	26	K	A
CALX_HUMAN	Calnexin OS=Homo sapiens GN=CANX PE=1 SV=2	QKSDAEEDGGTVSQEEEDR	2 Phospho (ST)	79.966331@S:3,79.966331@S:13	2267.81	756.945	2267.81	756.944	0.0018	3	33.3	12.2	Elution from: 33.219 to 33.219 scan no 2660 cid35.00 polarity:+:MA10:m1s	33.219	1	26	K	K
CALX_HUMAN	Calnexin OS=Homo sapiens GN=CANX PE=1 SV=2	QKSDAEEDGGTVSQEEEDRKPK	Label:13C(6)15N(4) (R);3 Label:2H(4) (K);2 Phospho (ST)	10.008269@R:19,4.025107@K:2,4.025107@K:20,4.025107@K:22,79.966331@S:3,79.966332@T:11	2643.14	661.792	2643.14	661.791	0.0009	4	33.2	11.2	Elution from: 30.107 to 30.107 scan no 2100 cid35.00 polarity:+:MA10:m1s	30.107	2	26	K	A
CALX_HUMAN	Calnexin OS=Homo sapiens GN=CANX PE=1 SV=2	QKSDAEEDGGTVSQEEEDRKPK	Label:13C(6)15N(4) (R);3 Label:2H(4) (K);Phospho (ST)	10.008269@R:19,4.025107@K:2,4.025107@K:20,4.025107@K:22,79.966331@S:13	2563.17	641.8	2563.17	641.8	0.0004	4	29.6	5.5	Elution from: 29.004 to 29.004 scan no 2040 cid35.00 polarity:+:MA10:m1s	29.004	2	26	K	A
CALX_HUMAN	Calnexin OS=Homo sapiens GN=CANX PE=1 SV=2	AEEDEILNRSPR	Label:13C(6)15N(4) (R);Phospho (ST)	10.008269@R:12,79.966331@S:10	1517.68	506.899	1517.67	506.899	0.0008	3	25.3	1.5	Elution from: 40.021 to 40.021 scan no 3628 cid35.00 polarity:+:MA10	40.021	1	26	K	N
CASC3_HUMAN	Protein CASC3 OS=Homo sapiens GN=CASC3 PE=1 SV=2	STVTGERQSGDGQESTEPVENK	Phospho (ST)	79.966331@S:9	2414.03	805.683	2414.02	805.682	0.0026	3	54.4	9	Elution from: 29.982 to 29.982 scan no 2185 cid35.00 polarity:+:MA10:m1s	29.982	1	26	K	V
CASC3_HUMAN	Protein CASC3 OS=Homo sapiens GN=CASC3 PE=1 SV=2	STVTGERQSGDGQESTEPVENK	Phospho (ST)	79.966332@T:2	2414.03	805.683	2414.02	805.682	0.0027	3	48.6	0	Elution from: 30.267 to 30.267 scan no 2250 cid35.00 polarity:+:MA10:m1s	30.267	1	26	K	V
CASC3_HUMAN	Protein CASC3 OS=Homo sapiens GN=CASC3 PE=1 SV=2	STVTGERQSGDGQESTEPVENK	Label:13C(6)15N(4) (R);Label:2H(4) (K);Phospho (ST)	10.008269@R:7,4.025107@K:22,79.966331@S:9	2428.06	810.361	2428.06	810.36	0.0035	3	45.7	17.1	Elution from: 30.187 to 30.187 scan no 2214 cid35.00 polarity:+:MA10:m1s	30.187	1	26	K	V
CASS4_HUMAN	Cas scaffolding protein family member 4 OS=Homo sapiens GN=CASS4 PE=1 SV=2	STPSTKQR	Label:2H(4) (K);Phospho (ST)	4.025107@K:6,79.966332@T:2	987.467	494.741	987.469	494.742	-0.0021	2	25.1	3.8	Elution from: 42.833 to 42.833 scan no 3843 cid35.00 polarity:+:MA10	42.833	1	26	K	E
CBPD_HUMAN	Carboxypeptidase D OS=Homo sapiens GN=CPD PE=1 SV=2	SLLSHEFQDETDTEEETLYSSK	Label:2H(4) (K);2 Phospho (ST)	4.025107@K:22,79.966332@T:11,79.966332@T:13	2751.11	918.043	2751.1	918.042	0.003	3	63.5	32	Elution from: 64.794 to 64.794 scan no 6130 cid35.00 polarity:+:MA10:m1s	64.794	0	25	K	H
CBPD_HUMAN	Carboxypeptidase D OS=Homo sapiens GN=CPD PE=1 SV=2	SLLSHEFQDETDTEEETLYSSK	2 Phospho (ST)	79.966332@T:11,79.966332@T:13	2747.08	916.701	2747.08	916.7	0.0027	3	43.8	10.1	Elution from: 64.938 to 64.938 scan no 6079 cid35.00 polarity:+:MA10:m1s	64.938	0	26	K	H
CBPD_HUMAN	Carboxypeptidase D OS=Homo sapiens GN=CPD PE=1 SV=2	SLLSHEFQDETDTEEETLYSSKH	2 Phospho (ST)	79.966332@T:11,79.966332@T:13	2884.14	962.387	2884.14	962.386	0.0022	3	38.4	8.2	Elution from: 60.794 to 60.794 scan no 5729 cid35.00 polarity:+:MA10:m1s	60.794	1	26	K	-
CBPD_HUMAN	Carboxypeptidase D OS=Homo sapiens GN=CPD PE=1 SV=2	SLLSHEFQDETDTEEETLYSSKH	Phospho (ST);Phospho (Y)	79.966332@T:11,79.966331@Y:19	2884.14	722.042	2884.14	722.041	0.0026	4	33.2	7.1	Elution from: 60.415 to 60.415 scan no 5782 cid35.00 polarity:+:MA10:m1s	60.415	1	26	K	-
CBX5_HUMAN	Chromobox protein homolog 5 OS=Homo sapiens GN=CBX5 PE=1 SV=1	RTADSSSSEDEEEYVVEK	4 Phospho (ST)	79.966331@S:5,79.966331@S:6,79.966331@S:7,79.966331@S:8	2378.76	1190.39	2378.75	1190.38	0.0038	2	53.9	14.4	Elution from: 50.226 to 50.226 scan no 4660 cid35.00 polarity:+:MA10:m1s	50.226	1	25	K	V
CBX5_HUMAN	Chromobox protein homolog 5 OS=Homo sapiens GN=CBX5 PE=1 SV=1	RTADSSSSEDEEEYVVEK	Label:13C(6)15N(4) (R);Label:2H(4) (K);4 Phospho (ST)	10.008269@R:1,4.025107@K:18,79.966331@S:5,79.966331@S:6,79.966331@S:7,79.966331@S:8	2392.79	798.603	2392.79	798.602	0.0022	3	45.9	7.9	Elution from: 49.991 to 49.991 scan no 4727 cid35.00 polarity:+:MA10:m1s	49.991	1	26	K	V
CBX5_HUMAN	Chromobox protein homolog 5 OS=Homo sapiens GN=CBX5 PE=1 SV=1	RTADSSSSEDEEEYVVEK	4 Phospho (ST)	79.966332@T:2,79.966331@S:5,79.966331@S:6,79.966331@S:7	2378.75	793.925	2378.75	793.925	0.0019	3	43.7	3.3	Elution from: 50.403 to 50.403 scan no 4680 cid35.00 polarity:+:MA10:m1s	50.403	1	25	K	V
CBX5_HUMAN	Chromobox protein homolog 5 OS=Homo sapiens GN=CBX5 PE=1 SV=1	RTADSSSSEDEEEYVVEK	Label:13C(6)15N(4) (R);Label:2H(4) (K);4 Phospho (ST)	10.008269@R:1,4.025107@K:18,79.966332@T:2,79.966331@S:5,79.966331@S:7,79.966331@S:8	2392.79	798.603	2392.79	798.602	0.0007	3	39.9	1.5	Elution from: 50.327 to 50.327 scan no 4747 cid35.00 polarity:+:MA10:m1s	50.327	1	25	K	V
CCD43_HUMAN	Coiled-coil domain-containing protein 43 OS=Homo sapiens GN=CCDC43 PE=1 SV=2	AALLAQYADVTDEEDEADEK	Phospho (ST)	79.966332@T:11	2274.94	1138.48	2274.94	1138.48	0.002	2	44.3	34.9	Elution from: 61.341 to 61.341 scan no 5730 cid35.00 polarity:+:MA10	61.341	0	26	K	D
CCD86_HUMAN	Coiled-coil domain-containing protein 86 OS=Homo sapiens GN=CCDC86 PE=1 SV=1	LQQGAGLESPQGQPEPGAASPQR	Label:13C(6)15N(4) (R);Phospho (ST)	10.008269@R:23,79.966331@S:20	2392.11	798.376	2392.1	798.376	0.0014	3	78.1	54.2	Elution from: 41.865 to 41.865 scan no 3717 cid35.00 polarity:+:MA10:m1s	41.865	0	26	R	Q
CCD86_HUMAN	Coiled-coil domain-containing protein 86 OS=Homo sapiens GN=CCDC86 PE=1 SV=1	ALVEFESNPEETREPGSPPSVQR	2 Label:13C(6)15N(4) (R);Phospho (ST)	10.008269@R:13,10.008269@R:23,79.966331@S:17	2654.22	885.746	2654.21	885.745	0.0023	3	71.7	16.6	Elution from: 53.673 to 53.673 scan no 5081 cid35.00 polarity:+:MA10:m1s	53.673	1	25	R	A
CCD86_HUMAN	Coiled-coil domain-containing protein 86 OS=Homo sapiens GN=CCDC86 PE=1 SV=1	ALVEFESNPEETREPGSPPSVQR	Phospho (ST)	79.966331@S:17	2634.2	879.074	2634.2	879.073	0.0033	3	66.3	9.7	Elution from: 53.560 to 53.560 scan no 5002 cid35.00 polarity:+:MA10:m1s	53.56	1	25	R	A
CCD86_HUMAN	Coiled-coil domain-containing protein 86 OS=Homo sapiens GN=CCDC86 PE=1 SV=1	LQQGAGLESPQGQPEPGAASPQR	Phospho (ST)	79.966331@S:20	2382.1	795.04	2382.1	795.039	0.0021	3	64.8	55.2	Elution from: 42.034 to 42.034 scan no 3785 cid35.00 polarity:+:MA10:m1s	42.034	0	25	R	Q
CCD86_HUMAN	Coiled-coil domain-containing protein 86 OS=Homo sapiens GN=CCDC86 PE=1 SV=1	LGGLRPESPESLTSVSR	Phospho (ST)	79.966331@S:8	1863.91	622.311	1863.91	622.31	0.0021	3	52.3	18.5	Elution from: 51.726 to 51.726 scan no 4902 cid35.00 polarity:+:MA10:m1s	51.726	0	26	R	T
CCD86_HUMAN	Coiled-coil domain-containing protein 86 OS=Homo sapiens GN=CCDC86 PE=1 SV=1	ALVEFESNPEETREPGSPPSVQR	Phospho (ST)	79.966331@S:20	2634.2	879.073	2634.2	879.073	0.0025	3	51.5	3.5	Elution from: 53.787 to 53.787 scan no 5109 cid35.00 polarity:+:MA10:m1s	53.787	1	26	R	A
CCD86_HUMAN	Coiled-coil domain-containing protein 86 OS=Homo sapiens GN=CCDC86 PE=1 SV=1	LQQGAGLESPQGQPEPGAASPQR	2 Phospho (ST)	79.966331@S:9,79.966331@S:20	2462.07	821.696	2462.06	821.695	0.0025	3	49.8	40.8	Elution from: 42.663 to 42.663 scan no 3840 cid35.00 polarity:+:MA10:m1s	42.663	0	25	R	Q
CCD86_HUMAN	Coiled-coil domain-containing protein 86 OS=Homo sapiens GN=CCDC86 PE=1 SV=1	AGLGSPERPPKTSPGSPR	3 Phospho (ST)	79.966331@S:5,79.966332@T:12,79.966331@S:16	2029.84	677.622	2029.84	677.621	0.0022	3	47.5	2.2	Elution from: 37.145 to 37.145 scan no 3062 cid35.00 polarity:+:MA10:m1s	37.145	1	25	R	L
CCD86_HUMAN	Coiled-coil domain-containing protein 86 OS=Homo sapiens GN=CCDC86 PE=1 SV=1	AGLGSPERPPKTSPGSPR	2 Phospho (ST)	79.966332@T:12,79.966331@S:16	1949.88	650.967	1949.88	650.966	0.002	3	47	9.5	Elution from: 34.650 to 34.650 scan no 2845 cid35.00 polarity:+:MA10	34.65	1	25	R	L
CCD86_HUMAN	Coiled-coil domain-containing protein 86 OS=Homo sapiens GN=CCDC86 PE=1 SV=1	AGLGSPERPPK	Label:13C(6)15N(4) (R);Label:2H(4) (K);Phospho (ST)	10.008269@R:8,4.025107@K:11,79.966331@S:5	1201.6	601.809	1201.6	601.809	0.0008	2	34.5	27.3	Elution from: 30.888 to 30.888 scan no 2201 cid35.00 polarity:+:MA10	30.888	0	26	R	T
CCD86_HUMAN	Coiled-coil domain-containing protein 86 OS=Homo sapiens GN=CCDC86 PE=1 SV=1	AGLGSPERPPKTSPGSPR	3 Phospho (ST)	79.966331@S:5,79.966331@S:13,79.966331@S:16	2029.84	1015.93	2029.84	1015.93	0.0017	2	31.4	0.6	Elution from: 37.521 to 37.521 scan no 3164 cid35.00 polarity:+:MA10:m1s	37.521	1	25	R	L
CCD86_HUMAN	Coiled-coil domain-containing protein 86 OS=Homo sapiens GN=CCDC86 PE=1 SV=1	RALVEFESNPEETREPGSPPSVQR	Phospho (ST)	79.966331@S:21	2790.3	698.582	2790.3	698.582	0.0026	4	29.8	0.3	Elution from: 50.260 to 50.260 scan no 4742 cid35.00 polarity:+:MA10:m1s	50.26	2	25	R	A
CCD86_HUMAN	Coiled-coil domain-containing protein 86 OS=Homo sapiens GN=CCDC86 PE=1 SV=1	AGLGSPERPPK	Phospho (ST)	79.966331@S:5	1187.57	396.864	1187.57	396.864	-0.0001	3	29.1	22.3	Elution from: 30.858 to 30.858 scan no 2234 cid35.00 polarity:+:MA10	30.858	0	25	R	T
CCM2_HUMAN	Malcavernin OS=Homo sapiens GN=CCM2 PE=1 SV=1	GIITDSFGR	Label:13C(6)15N(4) (R);Phospho (ST)	10.008269@R:9,79.966331@S:6	1054.47	528.244	1054.47	528.243	0.0004	2	35.6	12.8	Elution from: 52.991 to 52.991 scan no 5101 cid35.00 polarity:+:MA10	52.991	0	26	R	H
CCNH_HUMAN	Cyclin-H OS=Homo sapiens GN=CCNH PE=1 SV=1	HEEEEWTDDDLVESL	Phospho (ST)	79.966332@T:7	1924.73	963.371	1924.73	963.37	0.002	2	65.2	57.1	Elution from: 73.719 to 73.719 scan no 6794 cid35.00 polarity:+:MA10	73.719	0	26	K	-
CCNH_HUMAN	Cyclin-H OS=Homo sapiens GN=CCNH PE=1 SV=1	SKHEEEEWTDDDLVESL	Label:2H(4) (K);Phospho (ST)	4.025107@K:2,79.966332@T:9	2143.88	715.634	2143.88	715.633	0.0018	3	36.2	8.9	Elution from: 66.817 to 66.817 scan no 6309 cid35.00 polarity:+:MA10:m1s	66.817	1	25	K	-
CCNH_HUMAN	Cyclin-H OS=Homo sapiens GN=CCNH PE=1 SV=1	SKHEEEEWTDDDLVESL	Label:2H(4) (K);Phospho (ST)	4.025107@K:2,79.966331@S:1	2143.88	715.634	2143.88	715.633	0.0019	3	29.6	3.5	Elution from: 66.942 to 66.942 scan no 6159 cid35.00 polarity:+:MA10:m1s	66.942	1	25	K	-
CCNL1_HUMAN	Cyclin-L1 OS=Homo sapiens GN=CCNL1 PE=1 SV=1	AEEKSPISINVK	Phospho (ST)	79.966331@S:5	1393.69	697.85	1393.69	697.85	-0.0004	2	31.5	15.5	Elution from: 40.274 to 40.274 scan no 3527 cid35.00 polarity:+:MA10	40.274	1	25	K	T
CCPG1_HUMAN	Cell cycle progression protein 1 OS=Homo sapiens GN=CCPG1 PE=1 SV=3	TVSASESEDRLVAEQETEPSK	2 Phospho (ST)	79.966331@S:3,79.966331@S:7	2451.01	818.011	2451.01	818.01	0.0037	3	31.9	0	Elution from: 47.379 to 47.379 scan no 4432 cid35.00 polarity:+:MA10:m1s	47.379	1	26	K	E
CCYL1_HUMAN	Cyclin-Y-like protein 1 OS=Homo sapiens GN=CCNYL1 PE=1 SV=2	SFSADNFIGIQR	Label:13C(6)15N(4) (R);Phospho (ST)	10.008269@R:12,79.966331@S:3	1443.64	722.829	1443.64	722.828	0.0003	2	76.6	10.1	Elution from: 65.518 to 65.518 scan no 6110 cid35.00 polarity:+:MA10	65.518	0	26	R	S
CCYL1_HUMAN	Cyclin-Y-like protein 1 OS=Homo sapiens GN=CCNYL1 PE=1 SV=2	SFSADNFIGIQR	Phospho (ST)	79.966331@S:3	1433.63	717.825	1433.63	717.824	0.0009	2	71.5	13.8	Elution from: 65.212 to 65.212 scan no 6192 cid35.00 polarity:+:MA10	65.212	0	26	R	S
CD11A_HUMAN	Cyclin-dependent kinase 11A OS=Homo sapiens GN=CDK11A PE=1 SV=4	RGTSPRPPEGGLGYSQLGDDDLK	2 Phospho (ST)	79.966332@T:3,79.966331@S:4	2574.12	859.047	2574.12	859.046	0.0031	3	40	30.4	Elution from: 53.982 to 53.982 scan no 5128 cid35.00 polarity:+:MA10:m1s	53.982	1	26	K	E
CD11A_HUMAN	Cyclin-dependent kinase 11A OS=Homo sapiens GN=CDK11A PE=1 SV=4	RGTSPRPPEGGLGYSQLGDDDLK	2 Phospho (ST)	79.966332@T:3,79.966331@S:15	2574.12	644.536	2574.12	644.536	0.0013	4	31.2	6.2	Elution from: 53.308 to 53.308 scan no 5073 cid35.00 polarity:+:MA10:m1s	53.308	1	26	K	E
CD276_HUMAN	CD276 antigen OS=Homo sapiens GN=CD276 PE=1 SV=1	HSDSKEDDGQEIA	Phospho (ST)	79.966331@S:4	1509.56	755.788	1509.56	755.788	0.0004	2	41	19.4	Elution from: 27.779 to 27.779 scan no 1868 cid35.00 polarity:+:MA10	27.779	1	26	K	-
CD2AP_HUMAN	CD2-associated protein OS=Homo sapiens GN=CD2AP PE=1 SV=1	FNGGHSPTHSPEK	Phospho (ST)	79.966331@S:6	1473.6	492.208	1473.6	492.209	-0.0004	3	25.9	6.9	Elution from: 24.513 to 24.513 scan no 1387 cid35.00 polarity:+:MA10	24.513	0	26	R	I
CD2B2_HUMAN	CD2 antigen cytoplasmic tail-binding protein 2 OS=Homo sapiens GN=CD2BP2 PE=1 SV=1	GPGQPSSPQRLDR	Phospho (ST)	79.966331@S:7	1473.67	492.231	1473.67	492.231	-0.0002	3	29.8	5.7	Elution from: 29.406 to 29.406 scan no 2104 cid35.00 polarity:+:MA10	29.406	1	26	K	L
CD44_HUMAN	CD44 antigen OS=Homo sapiens GN=CD44 PE=1 SV=3	SQEMVHLVNK	Label:2H(4) (K);Phospho (ST)	4.025107@K:10,79.966331@S:1	1267.59	634.804	1267.59	634.804	0.0009	2	57.8	45	Elution from: 41.504 to 41.504 scan no 3678 cid35.00 polarity:+:MA10	41.504	0	26	K	E
CD44_HUMAN	CD44 antigen OS=Homo sapiens GN=CD44 PE=1 SV=3	SQEMVHLVNK	Label:2H(4) (K);Oxidation (M);Phospho (ST)	4.025107@K:10,15.994915@M:4,79.966331@S:1	1283.59	642.802	1283.59	642.801	0.0013	2	38.3	20.6	Elution from: 32.929 to 32.929 scan no 2479 cid35.00 polarity:+:MA10	32.929	0	26	K	E
CD44_HUMAN	CD44 antigen OS=Homo sapiens GN=CD44 PE=1 SV=3	KPSGLNGEASKSQEMVHLVNK	Phospho (ST)	79.966331@S:12	2332.13	584.039	2332.12	584.038	0.0014	4	37.8	12.1	Elution from: 40.754 to 40.754 scan no 3677 cid35.00 polarity:+:MA10:m1s	40.754	1	26	R	E
CD44_HUMAN	CD44 antigen OS=Homo sapiens GN=CD44 PE=1 SV=3	KPSGLNGEASKSQEMVHLVNK	Phospho (ST)	79.966331@S:10	2332.12	584.038	2332.12	584.038	0.0004	4	31.2	3.3	Elution from: 40.571 to 40.571 scan no 3695 cid35.00 polarity:+:MA10:m1s	40.571	1	26	R	E
CD44_HUMAN	CD44 antigen OS=Homo sapiens GN=CD44 PE=1 SV=3	SQEMVHLVNK	Phospho (ST)	79.966331@S:1	1263.57	632.791	1263.57	632.791	-0.0007	2	26.3	8.1	Elution from: 41.067 to 41.067 scan no 3737 cid35.00 polarity:+:MA10	41.067	0	26	K	E
CDC23_HUMAN	Cell division cycle protein 23 homolog OS=Homo sapiens GN=CDC23 PE=1 SV=3	RVSPLNLSSVTP	2 Phospho (ST)	79.966331@S:3,79.966332@T:11	1428.64	715.328	1428.64	715.328	0.0007	2	28.5	8.8	Elution from: 60.977 to 60.977 scan no 5743 cid35.00 polarity:+:MA10	60.977	1	26	R	-
CDC5L_HUMAN	Cell division cycle 5-like protein OS=Homo sapiens GN=CDC5L PE=1 SV=2	GGLNTPLHESDFSGVTPQR	2 Phospho (ST)	79.966332@T:5,79.966332@T:16	2170.91	724.644	2170.91	724.643	0.0005	3	32.9	5.9	Elution from: 54.600 to 54.600 scan no 5164 cid35.00 polarity:+:MA10	54.6	0	25	K	Q
CDK1_HUMAN	Cyclin-dependent kinase 1 OS=Homo sapiens GN=CDK1 PE=1 SV=3	IGEGTYGVVYK	Label:2H(4) (K);Phospho (ST);Phospho (Y)	4.025107@K:11,79.966332@T:5,79.966331@Y:6	1348.57	675.291	1348.57	675.29	0.0012	2	68.8	44.9	Elution from: 47.590 to 47.590 scan no 4384 cid35.00 polarity:+:MA10	47.59	0	26	K	G
CDK1_HUMAN	Cyclin-dependent kinase 1 OS=Homo sapiens GN=CDK1 PE=1 SV=3	IGEGTYGVVYK	Phospho (ST)	79.966332@T:5	1264.57	633.294	1264.57	633.294	0.0004	2	51.7	26.7	Elution from: 49.760 to 49.760 scan no 4767 cid35.00 polarity:+:MA10	49.76	0	26	K	G
CDK1_HUMAN	Cyclin-dependent kinase 1 OS=Homo sapiens GN=CDK1 PE=1 SV=3	IGEGTYGVVYK	Phospho (ST);Phospho (Y)	79.966332@T:5,79.966331@Y:6	1344.54	673.278	1344.54	673.277	0.0004	2	47.2	29.1	Elution from: 47.064 to 47.064 scan no 4430 cid35.00 polarity:+:MA10	47.064	0	26	K	G
CDK12_HUMAN	Cyclin-dependent kinase 12 OS=Homo sapiens GN=CDK12 PE=1 SV=2	LYNSEESRPYTNK	Phospho (ST)	79.966332@T:11	1679.72	840.868	1679.72	840.867	0.0021	2	52	28.6	Elution from: 32.953 to 32.953 scan no 2598 cid35.00 polarity:+:MA10:m1s	32.953	0	26	R	V
CDK12_HUMAN	Cyclin-dependent kinase 12 OS=Homo sapiens GN=CDK12 PE=1 SV=2	GSPVFLPR	Phospho (ST)	79.966331@S:2	951.458	476.736	951.458	476.736	0.0004	2	49.8	35.7	Elution from: 51.135 to 51.135 scan no 4902 cid35.00 polarity:+:MA10	51.135	0	26	K	K
CDK12_HUMAN	Cyclin-dependent kinase 12 OS=Homo sapiens GN=CDK12 PE=1 SV=2	SGSYSGRSPSPYGR	Phospho (ST);Phospho (Y)	79.966331@S:8,79.966331@Y:12	1616.6	539.875	1616.6	539.875	0.0004	3	29.7	2	Elution from: 31.264 to 31.264 scan no 2356 cid35.00 polarity:+:MA10	31.264	1	26	R	R
CDK12_HUMAN	Cyclin-dependent kinase 12 OS=Homo sapiens GN=CDK12 PE=1 SV=2	AITPPQQPYK	Phospho (ST)	79.966332@T:3	1221.58	611.798	1221.58	611.797	0.0017	2	28.3	18.2	Elution from: 41.024 to 41.024 scan no 3731 cid35.00 polarity:+:MA10	41.024	0	26	K	K
CDK12_HUMAN	Cyclin-dependent kinase 12 OS=Homo sapiens GN=CDK12 PE=1 SV=2	GSPVFLPR	Label:13C(6)15N(4) (R);Phospho (ST)	10.008269@R:8,79.966331@S:2	961.466	481.74	961.466	481.74	-0.0001	2	26.7	15.1	Elution from: 51.411 to 51.411 scan no 4876 cid35.00 polarity:+:MA10	51.411	0	25	K	K
CDK12_HUMAN	Cyclin-dependent kinase 12 OS=Homo sapiens GN=CDK12 PE=1 SV=2	RRSSSPFLSK	2 Label:13C(6)15N(4) (R);Label:2H(4) (K);2 Phospho (ST)	10.008269@R:1,10.008269@R:2,4.025107@K:10,79.966331@S:3,79.966331@S:5	1347.62	450.212	1347.62	450.212	0.0002	3	25.8	5.3	Elution from: 32.161 to 32.161 scan no 2380 cid35.00 polarity:+:MA10	32.161	2	26	R	R
CDK12_HUMAN	Cyclin-dependent kinase 12 OS=Homo sapiens GN=CDK12 PE=1 SV=2	SGSYSGRSPSPYGR	3 Phospho (ST)	79.966331@S:3,79.966331@S:5,79.966331@S:10	1696.57	566.531	1696.57	566.53	0.0029	3	25.4	5.7	Elution from: 33.724 to 33.724 scan no 2732 cid35.00 polarity:+:MA10:m1s	33.724	1	26	R	R
CDK13_HUMAN	Cyclin-dependent kinase 13 OS=Homo sapiens GN=CDK13 PE=1 SV=2	SLSPLGGRDDSPVSHR	3 Phospho (ST)	79.966331@S:1,79.966331@S:3,79.966331@S:11	1918.74	640.587	1918.74	640.587	0.0013	3	36	13.1	Elution from: 43.874 to 43.874 scan no 4090 cid35.00 polarity:+:MA10:m1s	43.874	1	26	R	A
CDK13_HUMAN	Cyclin-dependent kinase 13 OS=Homo sapiens GN=CDK13 PE=1 SV=2	GGDVSPSPYSSSSWR	Label:13C(6)15N(4) (R);Phospho (ST)	10.008269@R:15,79.966331@S:5	1657.67	829.84	1657.66	829.84	0.0011	2	31.3	13.5	Elution from: 49.532 to 49.532 scan no 4613 cid35.00 polarity:+:MA10	49.532	0	26	R	R
CDK13_HUMAN	Cyclin-dependent kinase 13 OS=Homo sapiens GN=CDK13 PE=1 SV=2	RLPRSPSPYSR	2 Phospho (ST)	79.966331@S:5,79.966331@S:7	1474.65	492.557	1474.65	492.557	-0.0006	3	26.4	0.4	Elution from: 33.119 to 33.119 scan no 2621 cid35.00 polarity:+:MA10	33.119	2	26	R	R
CDK3_HUMAN	Cyclin-dependent kinase 3 OS=Homo sapiens GN=CDK3 PE=1 SV=1	IGEGTYGVVYK	Label:2H(4) (K);Phospho (Y)	4.025107@K:11,79.966331@Y:6	1268.6	635.307	1268.6	635.307	0.0003	2	49	13.3	Elution from: 44.380 to 44.380 scan no 4104 cid35.00 polarity:+:MA10	44.38	0	25	K	A
CDK3_HUMAN	Cyclin-dependent kinase 3 OS=Homo sapiens GN=CDK3 PE=1 SV=1	IGEGTYGVVYK	Phospho (Y)	79.966331@Y:6	1264.57	633.294	1264.57	633.294	-0.0001	2	44.2	8.4	Elution from: 44.133 to 44.133 scan no 3938 cid35.00 polarity:+:MA10	44.133	0	26	K	A
CDS2_HUMAN	Phosphatidate cytidylyltransferase 2 OS=Homo sapiens GN=CDS2 PE=1 SV=1	VDGETASDSESRAESAPLPVSADDTPEVLNR	Phospho (ST)	79.966331@S:7	3293.46	1098.83	3293.46	1098.83	0.0034	3	82.8	2.1	Elution from: 57.984 to 57.984 scan no 5567 cid35.00 polarity:+:MA10:m1s	57.984	1	26	K	A
CDV3_HUMAN	Protein CDV3 homolog OS=Homo sapiens GN=CDV3 PE=1 SV=1	VQAMQISSEKEEDDNEK	2 Label:2H(4) (K);Oxidation (M);Phospho (ST)	4.025107@K:10,4.025107@K:17,15.994915@M:4,79.966331@S:8	2082.89	695.304	2082.89	695.304	0.0009	3	29	5.2	Elution from: 29.041 to 29.041 scan no 1955 cid35.00 polarity:+:MA10:m1s	29.041	1	26	R	R
CDYL1_HUMAN	Chromodomain Y-like protein OS=Homo sapiens GN=CDYL PE=1 SV=2	ILVPKSPVK	Phospho (ST)	79.966331@S:6	1059.61	530.812	1059.61	530.812	0.0001	2	33.1	4.5	Elution from: 36.718 to 36.718 scan no 3165 cid35.00 polarity:+:MA10	36.718	1	26	K	S
CE170_HUMAN	Centrosomal protein of 170 kDa OS=Homo sapiens GN=CEP170 PE=1 SV=1	GNKHDDGTQSDSENAGAHRR	Phospho (ST)	79.966331@S:10	2230.91	558.736	2230.91	558.735	0.003	4	30.4	9.1	Elution from: 21.476 to 21.476 scan no 1068 cid35.00 polarity:+:MA10:m1s	21.476	2	26	K	C
CE290_HUMAN	Centrosomal protein of 290 kDa OS=Homo sapiens GN=CEP290 PE=1 SV=2	RQVEILNAQQQSR	Label:13C(6)15N(4) (R);Phospho (ST)	10.008269@R:1,79.966331@S:12	1658.81	553.944	1658.81	553.945	-0.0019	3	28.9	17.4	Elution from: 48.617 to 48.617 scan no 4551 cid35.00 polarity:+:MA10	48.617	1	25	R	D
CEBPZ_HUMAN	CCAAT/enhancer-binding protein zeta OS=Homo sapiens GN=CEBPZ PE=1 SV=3	SQLDDHPESDDEENFIDANDDEDMEK	Label:2H(4) (K);Oxidation (M);Phospho (ST)	4.025107@K:26,15.994915@M:24,79.966331@S:9	3151.16	1051.39	3151.15	1051.39	0.0011	3	67	14.3	Elution from: 53.744 to 53.744 scan no 5050 cid35.00 polarity:+:MA10:m1s	53.744	0	26	R	F
CEBPZ_HUMAN	CCAAT/enhancer-binding protein zeta OS=Homo sapiens GN=CEBPZ PE=1 SV=3	SQLDDHPESDDEENFIDANDDEDMEK	Label:2H(4) (K);Phospho (ST)	4.025107@K:26,79.966331@S:9	3135.16	1046.06	3135.16	1046.06	0.0031	3	66.2	9.4	Elution from: 56.902 to 56.902 scan no 5285 cid35.00 polarity:+:MA10:m1s	56.902	0	26	R	F
CENPA_HUMAN	Histone H3-like centromeric protein A OS=Homo sapiens GN=CENPA PE=1 SV=1	RRSPSPTPTPGPSR	2 Phospho (ST)	79.966331@S:3,79.966331@S:5	1651.72	551.582	1651.72	551.582	0.0004	3	37	13.9	Elution from: 26.049 to 26.049 scan no 1626 cid35.00 polarity:+:MA10	26.049	2	25	R	R
CERS2_HUMAN	Ceramide synthase 2 OS=Homo sapiens GN=CERS2 PE=1 SV=1	LVEDERSDREETESSEGEEAAAGGGAK	2 Label:13C(6)15N(4) (R);Label:2H(4) (K);4 Phospho (ST)	10.008269@R:6,10.008269@R:9,4.025107@K:27,79.966331@S:7,79.966332@T:12,79.966331@S:14,79.966331@S:15	3151.14	1051.39	3151.14	1051.39	0.0026	3	41	34.4	Elution from: 37.034 to 37.034 scan no 3092 cid35.00 polarity:+:MA10:m1s	37.034	2	25	K	S
CETN2_HUMAN	Centrin-2 OS=Homo sapiens GN=CETN2 PE=1 SV=1	RMSPKPELTEEQK	Label:13C(6)15N(4) (R);2 Label:2H(4) (K);Oxidation (M);Phospho (ST)	10.008269@R:1,4.025107@K:5,4.025107@K:13,15.994915@M:2,79.966331@S:3	1685.82	562.946	1685.82	562.946	0.0001	3	33.1	23.4	Elution from: 27.878 to 27.878 scan no 1803 cid35.00 polarity:+:MA10	27.878	1	26	K	Q
CF010_HUMAN	Uncharacterized protein C6orf10 OS=Homo sapiens GN=C6orf10 PE=1 SV=3	DYTPSTNSLVSMASK	Oxidation (M);3 Phospho (ST);Phospho (Y)	15.994915@M:12,79.966332@T:3,79.966331@S:5,79.966331@S:14,79.966331@Y:2	1935.6	484.907	1935.61	484.909	-0.0057	4	16.1	6.5	Elution from: 40.631 to 40.631 scan no 3597 cid35.00 polarity:+:MA10	40.631	0	25	R	F
CH60_HUMAN	60 kDa heat shock protein, mitochondrial OS=Homo sapiens GN=HSPD1 PE=1 SV=2	TVIIEQSWGSPK	Phospho (ST)	79.966331@S:10	1423.68	712.845	1423.67	712.845	0.0008	2	61.5	23	Elution from: 55.776 to 55.776 scan no 5284 cid35.00 polarity:+:MA10	55.776	0	26	R	V
CH60_HUMAN	60 kDa heat shock protein, mitochondrial OS=Homo sapiens GN=HSPD1 PE=1 SV=2	TVIIEQSWGSPK	Label:2H(4) (K);Phospho (ST)	4.025107@K:12,79.966331@S:10	1427.7	714.858	1427.7	714.857	0.0012	2	56.5	28.9	Elution from: 55.388 to 55.388 scan no 5281 cid35.00 polarity:+:MA10	55.388	0	25	R	V
CHAP1_HUMAN	Chromosome alignment-maintaining phosphoprotein 1 OS=Homo sapiens GN=CHAMP1 PE=1 SV=2	GQESSSDQEQVDVESIDFSK	2 Phospho (ST)	79.966331@S:4,79.966331@S:6	2372.9	1187.46	2372.89	1187.45	0.0038	2	102.7	5	Elution from: 63.114 to 63.114 scan no 6027 cid35.00 polarity:+:MA10:m1s	63.114	0	26	K	E
CHAP1_HUMAN	Chromosome alignment-maintaining phosphoprotein 1 OS=Homo sapiens GN=CHAMP1 PE=1 SV=2	GQESSSDQEQVDVESIDFSK	Label:2H(4) (K);2 Phospho (ST)	4.025107@K:20,79.966331@S:4,79.966331@S:6	2376.92	1189.47	2376.92	1189.47	0.0028	2	79.9	8	Elution from: 63.541 to 63.541 scan no 5852 cid35.00 polarity:+:MA10:m1s	63.541	0	26	K	E
CHAP1_HUMAN	Chromosome alignment-maintaining phosphoprotein 1 OS=Homo sapiens GN=CHAMP1 PE=1 SV=2	DNQESSDAELSSSEYIK	Phospho (ST)	79.966331@S:6	1980.79	991.4	1980.78	991.399	0.0024	2	69.6	9.7	Elution from: 49.931 to 49.931 scan no 4718 cid35.00 polarity:+:MA10:m1s	49.931	0	26	K	T
CHAP1_HUMAN	Chromosome alignment-maintaining phosphoprotein 1 OS=Homo sapiens GN=CHAMP1 PE=1 SV=2	DNQESSDAELSSSEYIK	Label:2H(4) (K);Phospho (ST)	4.025107@K:17,79.966331@S:6	1984.81	993.413	1984.81	993.412	0.0019	2	67.1	12.9	Elution from: 50.378 to 50.378 scan no 4655 cid35.00 polarity:+:MA10:m1s	50.378	0	25	K	T
CHAP1_HUMAN	Chromosome alignment-maintaining phosphoprotein 1 OS=Homo sapiens GN=CHAMP1 PE=1 SV=2	DNQESSDAELSSSEYIK	2 Phospho (ST)	79.966331@S:6,79.966331@S:11	2060.75	1031.38	2060.75	1031.38	0.0029	2	67	7.5	Elution from: 52.525 to 52.525 scan no 4981 cid35.00 polarity:+:MA10:m1s	52.525	0	26	K	T
CHAP1_HUMAN	Chromosome alignment-maintaining phosphoprotein 1 OS=Homo sapiens GN=CHAMP1 PE=1 SV=2	LAPVPSPEPQKPAPVSPESVK	2 Phospho (ST)	79.966331@S:6,79.966331@S:16	2313.11	772.043	2313.11	772.043	0.002	3	63.3	7.4	Elution from: 48.125 to 48.125 scan no 4524 cid35.00 polarity:+:MA10:m1s	48.125	0	25	K	A
CHAP1_HUMAN	Chromosome alignment-maintaining phosphoprotein 1 OS=Homo sapiens GN=CHAMP1 PE=1 SV=2	LAPVPSPEPQKPAPVSPESVK	2 Phospho (ST)	79.966331@S:6,79.966331@S:19	2313.11	772.043	2313.11	772.043	0.0026	3	56.3	0.2	Elution from: 47.444 to 47.444 scan no 4472 cid35.00 polarity:+:MA10:m1s	47.444	0	26	K	A
CHAP1_HUMAN	Chromosome alignment-maintaining phosphoprotein 1 OS=Homo sapiens GN=CHAMP1 PE=1 SV=2	DNQESSDAELSSSEYIK	Label:2H(4) (K);2 Phospho (ST)	4.025107@K:17,79.966331@S:5,79.966331@S:11	2064.78	1033.4	2064.78	1033.39	0.0025	2	56	2	Elution from: 52.437 to 52.437 scan no 4990 cid35.00 polarity:+:MA10:m1s	52.437	0	25	K	T
CHAP1_HUMAN	Chromosome alignment-maintaining phosphoprotein 1 OS=Homo sapiens GN=CHAMP1 PE=1 SV=2	GGSPDLWK	Phospho (ST)	79.966331@S:3	938.39	470.202	938.39	470.202	0.0003	2	53.5	49.3	Elution from: 47.784 to 47.784 scan no 4475 cid35.00 polarity:+:MA10	47.784	0	26	R	S
CHAP1_HUMAN	Chromosome alignment-maintaining phosphoprotein 1 OS=Homo sapiens GN=CHAMP1 PE=1 SV=2	DNQESSDAELSSSEYIK	Label:2H(4) (K);2 Phospho (ST)	4.025107@K:17,79.966331@S:6,79.966331@S:12	2064.78	1033.39	2064.78	1033.39	0.0004	2	52.8	1.2	Elution from: 52.546 to 52.546 scan no 4933 cid35.00 polarity:+:MA10:m1s	52.546	0	26	K	T
CHAP1_HUMAN	Chromosome alignment-maintaining phosphoprotein 1 OS=Homo sapiens GN=CHAMP1 PE=1 SV=2	LAPVPSPEPQKPAPVSPESVK	2 Label:2H(4) (K);2 Phospho (ST)	4.025107@K:11,4.025107@K:21,79.966331@S:6,79.966331@S:16	2321.16	774.727	2321.16	774.726	0.0025	3	46.5	14.7	Elution from: 47.859 to 47.859 scan no 4380 cid35.00 polarity:+:MA10:m1s	47.859	0	26	K	A
CHAP1_HUMAN	Chromosome alignment-maintaining phosphoprotein 1 OS=Homo sapiens GN=CHAMP1 PE=1 SV=2	KTSPASLDFPESQK	Phospho (ST)	79.966331@S:3	1613.73	538.919	1613.73	538.919	0.0004	3	45.6	1	Elution from: 44.469 to 44.469 scan no 4101 cid35.00 polarity:+:MA10	44.469	1	26	R	S
CHAP1_HUMAN	Chromosome alignment-maintaining phosphoprotein 1 OS=Homo sapiens GN=CHAMP1 PE=1 SV=2	GGSPDLWK	Label:2H(4) (K);Phospho (ST)	4.025107@K:8,79.966331@S:3	942.415	472.215	942.415	472.215	0.0001	2	44.6	32.8	Elution from: 47.708 to 47.708 scan no 4396 cid35.00 polarity:+:MA10	47.708	0	25	R	S
CHAP1_HUMAN	Chromosome alignment-maintaining phosphoprotein 1 OS=Homo sapiens GN=CHAMP1 PE=1 SV=2	HASPDKWNDKPK	Phospho (ST)	79.966331@S:3	1501.67	501.565	1501.67	501.564	0.0005	3	39.6	31.4	Elution from: 26.155 to 26.155 scan no 1681 cid35.00 polarity:+:MA10	26.155	1	26	K	N
CHAP1_HUMAN	Chromosome alignment-maintaining phosphoprotein 1 OS=Homo sapiens GN=CHAMP1 PE=1 SV=2	KPSGSPDLWKLSPDQR	Label:13C(6)15N(4) (R);2 Label:2H(4) (K);2 Phospho (ST)	10.008269@R:16,4.025107@K:1,4.025107@K:10,79.966331@S:5,79.966331@S:12	1987.93	663.651	1987.93	663.65	0.0015	3	39.1	5.5	Elution from: 53.120 to 53.120 scan no 5030 cid35.00 polarity:+:MA10:m1s	53.12	1	25	R	K
CHAP1_HUMAN	Chromosome alignment-maintaining phosphoprotein 1 OS=Homo sapiens GN=CHAMP1 PE=1 SV=2	KPSGSPDLWKLSPDQR	2 Phospho (ST)	79.966331@S:5,79.966331@S:12	1969.87	657.631	1969.87	657.631	0.0015	3	38.5	9.2	Elution from: 52.745 to 52.745 scan no 5075 cid35.00 polarity:+:MA10	52.745	1	26	R	K
CHAP1_HUMAN	Chromosome alignment-maintaining phosphoprotein 1 OS=Homo sapiens GN=CHAMP1 PE=1 SV=2	KPSGSPDLWK	Phospho (ST)	79.966331@S:5	1193.55	597.781	1193.55	597.781	-0.0009	2	36.8	10.3	Elution from: 40.420 to 40.420 scan no 3547 cid35.00 polarity:+:MA10	40.42	0	25	R	L
CHAP1_HUMAN	Chromosome alignment-maintaining phosphoprotein 1 OS=Homo sapiens GN=CHAMP1 PE=1 SV=2	DNQESSDAELSSSEYIK	Phospho (ST)	79.966331@S:5	1980.79	661.27	1980.78	661.269	0.0039	3	36.1	1	Elution from: 50.439 to 50.439 scan no 4766 cid35.00 polarity:+:MA10:m1s	50.439	0	26	K	T
CHAP1_HUMAN	Chromosome alignment-maintaining phosphoprotein 1 OS=Homo sapiens GN=CHAMP1 PE=1 SV=2	KTSPASLDFPESQK	Phospho (ST)	79.966332@T:2	1613.73	538.919	1613.73	538.919	0.0007	3	29	0.1	Elution from: 44.146 to 44.146 scan no 4123 cid35.00 polarity:+:MA10:m1s	44.146	1	26	R	S
CHD1_HUMAN	Chromodomain-helicase-DNA-binding protein 1 OS=Homo sapiens GN=CHD1 PE=1 SV=2	RQIDSSEEDDDEEDYDNDKR	2 Label:13C(6)15N(4) (R);Label:2H(4) (K);2 Phospho (ST)	10.008269@R:1,10.008269@R:20,4.025107@K:19,79.966331@S:5,79.966331@S:6	2655.96	886.326	2655.95	886.325	0.0023	3	43	39.5	Elution from: 36.504 to 36.504 scan no 3132 cid35.00 polarity:+:MA10:m1s	36.504	2	26	K	S
CHD1_HUMAN	Chromodomain-helicase-DNA-binding protein 1 OS=Homo sapiens GN=CHD1 PE=1 SV=2	SSPSILAVQR	Phospho (ST)	79.966331@S:2	1136.56	569.287	1136.56	569.287	0.0009	2	40.4	0	Elution from: 47.078 to 47.078 scan no 4319 cid35.00 polarity:+:MA10	47.078	0	25	K	S
CHD3_HUMAN	Chromodomain-helicase-DNA-binding protein 3 OS=Homo sapiens GN=CHD3 PE=1 SV=3	METEADAPSPAPSLGERLEPR	Oxidation (M);2 Phospho (ST)	15.994915@M:1,79.966331@S:9,79.966331@S:13	2428.01	810.342	2428	810.341	0.0034	3	83.4	65.8	Elution from: 53.079 to 53.079 scan no 5048 cid35.00 polarity:+:MA10:m1s	53.079	1	26	K	K
CHD3_HUMAN	Chromodomain-helicase-DNA-binding protein 3 OS=Homo sapiens GN=CHD3 PE=1 SV=3	TSPTTPEASATNSPCTSKPATPAPSEK	Carbamidomethyl (C);2 Phospho (ST)	57.021465@C:15,79.966332@T:5,79.966331@S:9	2874.21	959.076	2874.2	959.075	0.0036	3	30.7	5.9	Elution from: 35.410 to 35.410 scan no 2937 cid35.00 polarity:+:MA10:m1s	35.41	0	26	K	G
CHD4_HUMAN	Chromodomain-helicase-DNA-binding protein 4 OS=Homo sapiens GN=CHD4 PE=1 SV=2	STAPETAIECTQAPAPASEDEK	Carbamidomethyl (C);Phospho (ST)	57.021465@C:10,79.966331@S:18	2382	795.006	2381.99	795.005	0.0027	3	31.7	26.3	Elution from: 44.068 to 44.068 scan no 4090 cid35.00 polarity:+:MA10:m1s	44.068	0	26	K	V
CHD7_HUMAN	Chromodomain-helicase-DNA-binding protein 7 OS=Homo sapiens GN=CHD7 PE=1 SV=3	DGETLEGSDAEESLDK	Phospho (ST)	79.966331@S:8	1773.68	887.849	1773.68	887.849	0.001	2	73.8	23.3	Elution from: 46.759 to 46.759 scan no 4434 cid35.00 polarity:+:MA10:m1s	46.759	0	26	K	T
CHIP_HUMAN	E3 ubiquitin-protein ligase CHIP OS=Homo sapiens GN=STUB1 PE=1 SV=2	LGAGGGSPEKSPSAQELK	2 Label:2H(4) (K);2 Phospho (ST)	4.025107@K:10,4.025107@K:18,79.966331@S:7,79.966331@S:11	1879.86	627.627	1879.86	627.626	0.0019	3	56.5	0.3	Elution from: 37.553 to 37.553 scan no 3126 cid35.00 polarity:+:MA10:m1s	37.553	1	26	R	E
CHIP_HUMAN	E3 ubiquitin-protein ligase CHIP OS=Homo sapiens GN=STUB1 PE=1 SV=2	LGAGGGSPEKSPSAQELK	2 Phospho (ST)	79.966331@S:7,79.966331@S:11	1871.81	624.943	1871.81	624.943	0.0005	3	51.2	5.6	Elution from: 37.062 to 37.062 scan no 3189 cid35.00 polarity:+:MA10	37.062	1	26	R	E
CHIP_HUMAN	E3 ubiquitin-protein ligase CHIP OS=Homo sapiens GN=STUB1 PE=1 SV=2	LGAGGGSPEKSPSAQELK	2 Label:2H(4) (K);Phospho (ST)	4.025107@K:10,4.025107@K:18,79.966331@S:7	1799.89	600.971	1799.89	600.971	0	3	37.5	13.3	Elution from: 35.410 to 35.410 scan no 2953 cid35.00 polarity:+:MA10	35.41	1	26	R	E
CHIP_HUMAN	E3 ubiquitin-protein ligase CHIP OS=Homo sapiens GN=STUB1 PE=1 SV=2	LGAGGGSPEKSPSAQELK	Phospho (ST)	79.966331@S:7	1791.84	598.288	1791.84	598.287	0.0026	3	35.3	6.6	Elution from: 35.944 to 35.944 scan no 3050 cid35.00 polarity:+:MA10	35.944	1	26	R	E
CHIP_HUMAN	E3 ubiquitin-protein ligase CHIP OS=Homo sapiens GN=STUB1 PE=1 SV=2	LGAGGGSPEKSPSAQELK	2 Phospho (ST)	79.966331@S:7,79.966331@S:13	1871.81	624.943	1871.81	624.943	0.0015	3	33.8	0.9	Elution from: 37.503 to 37.503 scan no 3142 cid35.00 polarity:+:MA10:m1s	37.503	1	26	R	E
CHM2B_HUMAN	Charged multivesicular body protein 2b OS=Homo sapiens GN=CHMP2B PE=1 SV=1	ATISDEEIER	Phospho (ST)	79.966331@S:4	1241.52	621.766	1241.52	621.766	0.0007	2	47.1	16.9	Elution from: 41.114 to 41.114 scan no 3623 cid35.00 polarity:+:MA10	41.114	0	26	K	Q
CHM2B_HUMAN	Charged multivesicular body protein 2b OS=Homo sapiens GN=CHMP2B PE=1 SV=1	ATISDEEIER	Label:13C(6)15N(4) (R);Phospho (ST)	10.008269@R:10,79.966331@S:4	1251.53	626.77	1251.53	626.77	-0.0001	2	28.1	9.5	Elution from: 41.022 to 41.022 scan no 3569 cid35.00 polarity:+:MA10	41.022	0	25	K	Q
CHSP1_HUMAN	Calcium-regulated heat stable protein 1 OS=Homo sapiens GN=CARHSP1 PE=1 SV=2	ERSPSPLRGNVVPSPLPTR	3 Phospho (ST)	79.966331@S:3,79.966331@S:5,79.966331@S:14	2298.03	767.019	2298.03	767.018	0.0025	3	50.8	15.1	Elution from: 52.731 to 52.731 scan no 4953 cid35.00 polarity:+:MA10:m1s	52.731	2	26	R	R
CHSP1_HUMAN	Calcium-regulated heat stable protein 1 OS=Homo sapiens GN=CARHSP1 PE=1 SV=2	TFSATVR	Label:13C(6)15N(4) (R);Phospho (ST)	10.008269@R:7,79.966331@S:3	870.388	436.201	870.388	436.201	0.0006	2	46	22.2	Elution from: 38.619 to 38.619 scan no 3408 cid35.00 polarity:+:MA10	38.619	0	25	R	A
CHSP1_HUMAN	Calcium-regulated heat stable protein 1 OS=Homo sapiens GN=CARHSP1 PE=1 SV=2	TFSATVR	Phospho (ST)	79.966331@S:3	860.379	431.197	860.379	431.197	-0.0001	2	39.1	15.7	Elution from: 38.240 to 38.240 scan no 3239 cid35.00 polarity:+:MA10	38.24	0	26	R	A
CHSP1_HUMAN	Calcium-regulated heat stable protein 1 OS=Homo sapiens GN=CARHSP1 PE=1 SV=2	ERSPSPLRGNVVPSPLPTR	2 Phospho (ST)	79.966331@S:3,79.966331@S:5	2218.07	740.363	2218.07	740.363	0.0014	3	31.3	17.2	Elution from: 51.493 to 51.493 scan no 4764 cid35.00 polarity:+:MA10:m1s	51.493	2	26	R	R
CHSP1_HUMAN	Calcium-regulated heat stable protein 1 OS=Homo sapiens GN=CARHSP1 PE=1 SV=2	TRTFSATVR	Phospho (ST)	79.966332@T:3	1117.53	373.517	1117.53	373.517	0.0001	3	23.1	4.7	Elution from: 34.406 to 34.406 scan no 2679 cid35.00 polarity:+:MA10	34.406	1	26	R	A
CI078_HUMAN	Uncharacterized protein C9orf78 OS=Homo sapiens GN=C9orf78 PE=1 SV=1	RRGDSESEEDEQDSEEVR	2 Phospho (ST)	79.966331@S:5,79.966331@S:7	2310.83	771.283	2310.83	771.283	0.0005	3	67.4	60.7	Elution from: 29.025 to 29.025 scan no 1963 cid35.00 polarity:+:MA10:m1s	29.025	2	25	R	L
CI078_HUMAN	Uncharacterized protein C9orf78 OS=Homo sapiens GN=C9orf78 PE=1 SV=1	VGDTEKPEPERSPPNR	Phospho (ST)	79.966331@S:12	1886.85	629.958	1886.85	629.958	0.0004	3	51.1	10.1	Elution from: 27.613 to 27.613 scan no 1784 cid35.00 polarity:+:MA10:m1s	27.613	1	26	R	K
CI078_HUMAN	Uncharacterized protein C9orf78 OS=Homo sapiens GN=C9orf78 PE=1 SV=1	RGDSESEEDEQDSEEVR	2 Label:13C(6)15N(4) (R);2 Phospho (ST)	10.008269@R:1,10.008269@R:17,79.966331@S:4,79.966331@S:6	2174.74	725.922	2174.74	725.922	0.0007	3	39.9	26	Elution from: 31.877 to 31.877 scan no 2377 cid35.00 polarity:+:MA10:m1s	31.877	1	25	R	L
CIC_HUMAN	Protein capicua homolog OS=Homo sapiens GN=CIC PE=1 SV=2	TQSLSALPK	Label:2H(4) (K);Phospho (ST)	4.025107@K:9,79.966331@S:3	1027.52	514.769	1027.53	514.77	-0.0029	2	35.1	2.9	Elution from: 42.977 to 42.977 scan no 3864 cid35.00 polarity:+:MA10	42.977	0	26	R	E
CING_HUMAN	Cingulin OS=Homo sapiens GN=CGN PE=1 SV=2	SHSQASLAGPGPVDPSNR	Label:13C(6)15N(4) (R);2 Phospho (ST)	10.008269@R:18,79.966331@S:1,79.966331@S:3	1945.79	649.605	1945.8	649.606	-0.002	3	30.7	0.1	Elution from: 40.782 to 40.782 scan no 3618 cid35.00 polarity:+:MA10:m1s	40.782	0	25	R	S
CIR1_HUMAN	Corepressor interacting with RBPJ 1 OS=Homo sapiens GN=CIR1 PE=1 SV=1	NLTANDPSQEYVASEGEEDPEVEFLK	Label:2H(4) (K);Phospho (ST)	4.025107@K:26,79.966331@S:14	2993.3	998.775	2993.3	998.774	0.0042	3	67.8	25.2	Elution from: 68.504 to 68.504 scan no 6352 cid35.00 polarity:+:MA10:m1s	68.504	0	25	R	S
CJ114_HUMAN	Putative uncharacterized protein C10orf114 OS=Homo sapiens GN=C10orf114 PE=2 SV=1	ATRSPGSIR	2 Phospho (ST)	79.966331@S:4,79.966331@S:7	1103.45	552.733	1103.45	552.734	-0.0005	2	22.8	5.9	Elution from: 27.643 to 27.643 scan no 1788 cid35.00 polarity:+:MA10	27.643	1	25	R	R
CLCA_HUMAN	Clathrin light chain A OS=Homo sapiens GN=CLTA PE=1 SV=1	LQSEPESIR	Phospho (ST)	79.966331@S:3	1137.51	569.761	1137.51	569.761	0.0002	2	30.6	14.4	Elution from: 56.686 to 56.686 scan no 5289 cid35.00 polarity:+:MA10	56.686	0	25	R	K
CLCC1_HUMAN	Chloride channel CLIC-like protein 1 OS=Homo sapiens GN=CLCC1 PE=1 SV=1	ESSTESSQSAKPVSGQDTSGNTEGSPAAEK	Phospho (ST)	79.966331@S:25	3032.27	1011.77	3032.27	1011.76	0.0019	3	87.6	6.8	Elution from: 28.673 to 28.673 scan no 2022 cid35.00 polarity:+:MA10:m1s	28.673	0	26	K	A
CLIP1_HUMAN	CAP-Gly domain-containing linker protein 1 OS=Homo sapiens GN=CLIP1 PE=1 SV=2	TASESISNLSEAGSIK	2 Phospho (ST)	79.966331@S:10,79.966331@S:14	1752.72	877.37	1752.72	877.368	0.0025	2	35.5	13	Elution from: 50.559 to 50.559 scan no 4672 cid35.00 polarity:+:MA10	50.559	0	26	K	K
CN043_HUMAN	Uncharacterized protein C14orf43 OS=Homo sapiens GN=C14orf43 PE=1 SV=2	RASQEANLLTLAQK	Phospho (ST)	79.966331@S:3	1621.82	541.613	1621.82	541.614	-0.0007	3	57.1	40.4	Elution from: 54.287 to 54.287 scan no 5152 cid35.00 polarity:+:MA10	54.287	1	26	R	A
CND3_HUMAN	Condensin complex subunit 3 OS=Homo sapiens GN=NCAPG PE=1 SV=1	TLHCEGTEINSDDEQESKEVEETATAK	Carbamidomethyl (C);2 Label:2H(4) (K);Phospho (ST)	57.021465@C:4,4.025107@K:18,4.025107@K:27,79.966331@S:11	3137.35	1046.79	3137.35	1046.79	0.0031	3	70.5	9.1	Elution from: 47.395 to 47.395 scan no 4311 cid35.00 polarity:+:MA10:m1s	47.395	1	25	K	N
CND3_HUMAN	Condensin complex subunit 3 OS=Homo sapiens GN=NCAPG PE=1 SV=1	TLHCEGTEINSDDEQESK	Carbamidomethyl (C);Phospho (ST)	57.021465@C:4,79.966331@S:11	2170.84	724.62	2170.84	724.619	0.0006	3	42.4	26.3	Elution from: 33.660 to 33.660 scan no 2584 cid35.00 polarity:+:MA10:m1s	33.66	0	25	K	E
CND3_HUMAN	Condensin complex subunit 3 OS=Homo sapiens GN=NCAPG PE=1 SV=1	TLHCEGTEINSDDEQESKEVEETATAK	Carbamidomethyl (C);2 Label:2H(4) (K);Phospho (ST)	57.021465@C:4,4.025107@K:18,4.025107@K:27,79.966331@S:17	3137.35	785.345	3137.35	785.344	0.0033	4	36.4	9.8	Elution from: 47.424 to 47.424 scan no 4315 cid35.00 polarity:+:MA10:m1s	47.424	1	25	K	N
COF1_HUMAN	Cofilin-1 OS=Homo sapiens GN=CFL1 PE=1 SV=3	ASGVAVSDGVIK	Phospho (ST)	79.966331@S:2	1181.57	591.792	1181.57	591.792	0.0009	2	44.8	33.7	Elution from: 43.893 to 43.893 scan no 3949 cid35.00 polarity:+:MA10	43.893	0	26	M	V
COIL_HUMAN	Coilin OS=Homo sapiens GN=COIL PE=1 SV=1	RAFQLEEGEETEPDCK	Carbamidomethyl (C);Phospho (ST)	57.021465@C:15,79.966332@T:11	2016.82	673.279	2016.81	673.278	0.0016	3	72.9	59	Elution from: 44.281 to 44.281 scan no 4035 cid35.00 polarity:+:MA10:m1s	44.281	1	25	K	Y
COIL_HUMAN	Coilin OS=Homo sapiens GN=COIL PE=1 SV=1	AFQLEEGEETEPDCK	Carbamidomethyl (C);Phospho (ST)	57.021465@C:14,79.966332@T:10	1860.71	931.365	1860.71	931.364	0.0023	2	50.9	41.8	Elution from: 49.295 to 49.295 scan no 4636 cid35.00 polarity:+:MA10:m1s	49.295	0	25	R	Y
COIL_HUMAN	Coilin OS=Homo sapiens GN=COIL PE=1 SV=1	LIIESPSNTSSTEPA	Phospho (ST)	79.966331@S:5	1624.72	813.369	1624.72	813.369	0.0001	2	47.7	7	Elution from: 52.423 to 52.423 scan no 4949 cid35.00 polarity:+:MA10:m1s	52.423	0	25	R	-
COIL_HUMAN	Coilin OS=Homo sapiens GN=COIL PE=1 SV=1	RAFQLEEGEETEPDCK	Carbamidomethyl (C);Label:13C(6)15N(4) (R);Label:2H(4) (K);Phospho (ST)	57.021465@C:15,10.008269@R:1,4.025107@K:16,79.966332@T:11	2030.85	677.958	2030.85	677.956	0.005	3	40.9	32.7	Elution from: 44.288 to 44.288 scan no 4021 cid35.00 polarity:+:MA10:m1s	44.288	1	25	K	Y
COPA_HUMAN	Coatomer subunit alpha OS=Homo sapiens GN=COPA PE=1 SV=2	NLSPGAVESDVR	Label:13C(6)15N(4) (R);Phospho (ST)	10.008269@R:12,79.966331@S:3	1332.6	667.305	1332.6	667.305	0.0003	2	36	29.8	Elution from: 50.674 to 50.674 scan no 4798 cid35.00 polarity:+:MA10	50.674	0	26	K	G
COPA_HUMAN	Coatomer subunit alpha OS=Homo sapiens GN=COPA PE=1 SV=2	NLSPGAVESDVR	Phospho (ST)	79.966331@S:3	1322.58	662.3	1322.59	662.301	-0.002	2	34.9	30.2	Elution from: 51.141 to 51.141 scan no 4903 cid35.00 polarity:+:MA10	51.141	0	26	K	G
CP088_HUMAN	Protein C16orf88 OS=Homo sapiens GN=C16orf88 PE=1 SV=1	YSVLNNDDYFADVSPLRATSPSK	2 Phospho (ST)	79.966331@S:14,79.966331@S:20	2718.17	907.063	2718.16	907.061	0.0047	3	85	0	Elution from: 69.725 to 69.725 scan no 6387 cid35.00 polarity:+:MA10:m1s	69.725	1	25	R	S
CP088_HUMAN	Protein C16orf88 OS=Homo sapiens GN=C16orf88 PE=1 SV=1	YSVLNNDDYFADVSPLRATSPSK	2 Phospho (ST)	79.966331@S:20,79.966331@S:22	2718.16	907.062	2718.16	907.061	0.0024	3	66.4	0	Elution from: 69.604 to 69.604 scan no 6466 cid35.00 polarity:+:MA10:m1s	69.604	1	26	R	S
CP088_HUMAN	Protein C16orf88 OS=Homo sapiens GN=C16orf88 PE=1 SV=1	YSVLNNDDYFADVSPLRATSPSK	Label:13C(6)15N(4) (R);Label:2H(4) (K);2 Phospho (ST)	10.008269@R:17,4.025107@K:23,79.966331@S:14,79.966331@S:22	2732.2	911.74	2732.19	911.739	0.004	3	61.8	1	Elution from: 69.906 to 69.906 scan no 6477 cid35.00 polarity:+:MA10:m1s	69.906	1	25	R	S
CP088_HUMAN	Protein C16orf88 OS=Homo sapiens GN=C16orf88 PE=1 SV=1	YSVLNNDDYFADVSPLRATSPSK	Label:13C(6)15N(4) (R);Label:2H(4) (K);2 Phospho (ST)	10.008269@R:17,4.025107@K:23,79.966331@S:14,79.966331@S:20	2732.2	911.739	2732.19	911.739	0.0015	3	61	2	Elution from: 69.961 to 69.961 scan no 6482 cid35.00 polarity:+:MA10:m1s	69.961	1	25	R	S
CP088_HUMAN	Protein C16orf88 OS=Homo sapiens GN=C16orf88 PE=1 SV=1	ESGVAGDPWKEETDTDLEVVLEK	2 Label:2H(4) (K);2 Phospho (ST)	4.025107@K:10,4.025107@K:23,79.966332@T:13,79.966332@T:15	2713.19	905.405	2713.19	905.404	0.0045	3	56.2	17	Elution from: 70.263 to 70.263 scan no 6437 cid35.00 polarity:+:MA10:m1s	70.263	1	25	K	K
CP088_HUMAN	Protein C16orf88 OS=Homo sapiens GN=C16orf88 PE=1 SV=1	ESGVAGDPWKEETDTDLEVVLEK	2 Phospho (ST)	79.966332@T:13,79.966332@T:15	2705.14	902.721	2705.14	902.721	0.0015	3	54.9	27.4	Elution from: 70.103 to 70.103 scan no 6592 cid35.00 polarity:+:MA10:m1s	70.103	1	25	K	K
CP088_HUMAN	Protein C16orf88 OS=Homo sapiens GN=C16orf88 PE=1 SV=1	YSVLNNDDYFADVSPLRATSPSK	Label:13C(6)15N(4) (R);Label:2H(4) (K);2 Phospho (ST)	10.008269@R:17,4.025107@K:23,79.966331@S:20,79.966331@S:22	2732.2	911.74	2732.19	911.739	0.0017	3	31.4	0	Elution from: 69.946 to 69.946 scan no 6480 cid35.00 polarity:+:MA10	69.946	1	25	R	S
CPIN1_HUMAN	Anamorsin OS=Homo sapiens GN=CIAPIN1 PE=1 SV=2	KSSPSVKPAVDPAAAK	Phospho (ST)	79.966331@S:3	1631.83	544.95	1631.83	544.95	0.0004	3	35.9	5.3	Elution from: 30.157 to 30.157 scan no 2107 cid35.00 polarity:+:MA10	30.157	1	26	K	L
CPSF2_HUMAN	Cleavage and polyadenylation specificity factor subunit 2 OS=Homo sapiens GN=CPSF2 PE=1 SV=2	EADIDSSDESDIEEDIDQPSAHK	Label:2H(4) (K);3 Phospho (ST)	4.025107@K:23,79.966331@S:6,79.966331@S:7,79.966331@S:10	2787.99	930.337	2787.99	930.336	0.0026	3	44.8	32.1	Elution from: 60.610 to 60.610 scan no 5589 cid35.00 polarity:+:MA10:m1s	60.61	0	26	K	T
CPSF2_HUMAN	Cleavage and polyadenylation specificity factor subunit 2 OS=Homo sapiens GN=CPSF2 PE=1 SV=2	EADIDSSDESDIEEDIDQPSAHK	3 Phospho (ST)	79.966331@S:6,79.966331@S:7,79.966331@S:10	2783.97	928.997	2783.96	928.994	0.0067	3	41.5	39.2	Elution from: 60.275 to 60.275 scan no 5717 cid35.00 polarity:+:MA10:m1s	60.275	0	25	K	T
CPSF7_HUMAN	Cleavage and polyadenylation specificity factor subunit 7 OS=Homo sapiens GN=CPSF7 PE=1 SV=1	DSSDSADGRATPSENLVPSSAR	Phospho (ST)	79.966332@T:11	2297.98	767	2297.98	766.999	0.0019	3	61	1.9	Elution from: 43.391 to 43.391 scan no 4051 cid35.00 polarity:+:MA10:m1s	43.391	1	26	R	V
CR025_HUMAN	Uncharacterized protein C18orf25 OS=Homo sapiens GN=C18orf25 PE=1 SV=2	RDSSESQLASTESDKPTTGR	Phospho (ST)	79.966331@S:3	2230.97	744.665	2230.97	744.664	0.0037	3	37.3	0.6	Elution from: 32.590 to 32.590 scan no 2434 cid35.00 polarity:+:MA10:m1s	32.59	1	26	R	V
CRK_HUMAN	Adapter molecule crk OS=Homo sapiens GN=CRK PE=1 SV=2	DSSTSPGDYVLSVSENSR	Phospho (ST)	79.966331@S:3	1978.82	660.613	1978.82	660.613	0.0004	3	66.3	9.7	Elution from: 62.504 to 62.504 scan no 5749 cid35.00 polarity:+:MA10:m1s	62.504	0	26	R	V
CRK_HUMAN	Adapter molecule crk OS=Homo sapiens GN=CRK PE=1 SV=2	DSSTSPGDYVLSVSENSR	Phospho (ST)	79.966331@S:5	1978.82	660.613	1978.82	660.613	0.0018	3	54.9	4.3	Elution from: 62.553 to 62.553 scan no 5820 cid35.00 polarity:+:MA10:m1s	62.553	0	25	R	V
CRUM1_HUMAN	Crumbs homolog 1 OS=Homo sapiens GN=CRB1 PE=1 SV=2	GSVCNIALR	Carbamidomethyl (C);Label:13C(6)15N(4) (R);Phospho (ST)	57.021465@C:4,10.008269@R:9,79.966331@S:2	1078.48	540.25	1078.49	540.251	-0.0025	2	30.8	4.1	Elution from: 38.689 to 38.689 scan no 3418 cid35.00 polarity:+:MA10	38.689	0	25	K	F
CS021_HUMAN	Uncharacterized protein C19orf21 OS=Homo sapiens GN=C19orf21 PE=1 SV=1	ALSSDSILSPAPDAR	Phospho (ST)	79.966331@S:4	1578.73	790.372	1578.73	790.372	0.0009	2	66.2	9	Elution from: 55.521 to 55.521 scan no 5261 cid35.00 polarity:+:MA10:m1s	55.521	0	26	R	A
CS021_HUMAN	Uncharacterized protein C19orf21 OS=Homo sapiens GN=C19orf21 PE=1 SV=1	ALSSDSILSPAPDAR	Label:13C(6)15N(4) (R);Phospho (ST)	10.008269@R:15,79.966331@S:3	1588.74	795.377	1588.74	795.376	0.0014	2	54.2	8.9	Elution from: 55.558 to 55.558 scan no 5213 cid35.00 polarity:+:MA10	55.558	0	26	R	A
CS021_HUMAN	Uncharacterized protein C19orf21 OS=Homo sapiens GN=C19orf21 PE=1 SV=1	ALSSDSILSPAPDAR	Phospho (ST)	79.966331@S:3	1578.73	790.372	1578.73	790.372	0.0002	2	54	10	Elution from: 55.182 to 55.182 scan no 5298 cid35.00 polarity:+:MA10	55.182	0	26	R	A
CS021_HUMAN	Uncharacterized protein C19orf21 OS=Homo sapiens GN=C19orf21 PE=1 SV=1	RALSSDSILSPAPDAR	Phospho (ST)	79.966331@S:5	1734.83	579.284	1734.83	579.284	0.0007	3	53.3	0	Elution from: 48.616 to 48.616 scan no 4590 cid35.00 polarity:+:MA10:m1s	48.616	1	26	R	A
CS021_HUMAN	Uncharacterized protein C19orf21 OS=Homo sapiens GN=C19orf21 PE=1 SV=1	NALFPEVFSPTPDENSDQNSR	Label:13C(6)15N(4) (R);Phospho (ST)	10.008269@R:21,79.966331@S:9	2453.04	818.688	2453.04	818.688	0.0025	3	46.1	0.1	Elution from: 73.046 to 73.046 scan no 6737 cid35.00 polarity:+:MA10:m1s	73.046	0	25	R	S
CS021_HUMAN	Uncharacterized protein C19orf21 OS=Homo sapiens GN=C19orf21 PE=1 SV=1	SQSSDLLER	Label:13C(6)15N(4) (R);Phospho (ST)	10.008269@R:9,79.966331@S:3	1123.48	562.746	1123.48	562.747	-0.0012	2	42	12	Elution from: 40.443 to 40.443 scan no 3498 cid35.00 polarity:+:MA10	40.443	0	25	K	E
CS024_HUMAN	Uncharacterized membrane protein C19orf24 OS=Homo sapiens GN=C19orf24 PE=2 SV=2	RYGLLANTEDPTEMASLDSDEETVFESR	Oxidation (M);2 Phospho (ST)	15.994915@M:14,79.966331@S:16,79.966331@S:19	3350.37	1117.8	3350.36	1117.79	0.0077	3	61.6	10	Elution from: 71.160 to 71.160 scan no 6596 cid35.00 polarity:+:MA10:m1s	71.16	1	26	R	N
CSRP1_HUMAN	Cysteine and glycine-rich protein 1 OS=Homo sapiens GN=CSRP1 PE=1 SV=3	GFGFGQGAGALVHSE	Phospho (ST)	79.966331@S:14	1512.64	757.328	1512.64	757.327	0.0016	2	64.4	63.4	Elution from: 62.154 to 62.154 scan no 5806 cid35.00 polarity:+:MA10	62.154	0	26	K	-
CTDP1_HUMAN	RNA polymerase II subunit A C-terminal domain phosphatase OS=Homo sapiens GN=CTDP1 PE=1 SV=3	EVDDILGEGSDDSDSEK	Label:2H(4) (K);2 Phospho (ST)	4.025107@K:17,79.966331@S:10,79.966331@S:13	1972.7	987.359	1972.7	987.358	0.002	2	67.2	11.8	Elution from: 55.709 to 55.709 scan no 5203 cid35.00 polarity:+:MA10:m1s	55.709	0	25	K	R
CTDP1_HUMAN	RNA polymerase II subunit A C-terminal domain phosphatase OS=Homo sapiens GN=CTDP1 PE=1 SV=3	EVDDILGEGSDDSDSEK	2 Phospho (ST)	79.966331@S:13,79.966331@S:15	1968.68	985.346	1968.68	985.345	0.0018	2	33.9	1.5	Elution from: 55.820 to 55.820 scan no 5186 cid35.00 polarity:+:MA10	55.82	0	26	K	R
CTGE5_HUMAN	Cutaneous T-cell lymphoma-associated antigen 5 OS=Homo sapiens GN=CTAGE5 PE=1 SV=4	LNRSNSELEDEILCLEK	Carbamidomethyl (C);Phospho (ST)	57.021465@C:14,79.966331@S:4	2140.97	714.665	2140.97	714.664	0.0025	3	88.3	6.6	Elution from: 68.248 to 68.248 scan no 6343 cid35.00 polarity:+:MA10:m1s	68.248	1	26	K	E
CTGE5_HUMAN	Cutaneous T-cell lymphoma-associated antigen 5 OS=Homo sapiens GN=CTAGE5 PE=1 SV=4	SNSELEDEILCLEK	Carbamidomethyl (C);Phospho (ST)	57.021465@C:11,79.966331@S:3	1757.75	879.881	1757.74	879.879	0.0052	2	76.9	5.5	Elution from: 74.793 to 74.793 scan no 6981 cid35.00 polarity:+:MA10:m1s	74.793	0	26	R	E
CTGE5_HUMAN	Cutaneous T-cell lymphoma-associated antigen 5 OS=Homo sapiens GN=CTAGE5 PE=1 SV=4	FCSNSGRLSGPAELR	Carbamidomethyl (C);Phospho (ST)	57.021465@C:2,79.966331@S:9	1729.76	577.595	1729.76	577.594	0.0014	3	32.7	11.1	Elution from: 44.416 to 44.416 scan no 4094 cid35.00 polarity:+:MA10:m1s	44.416	1	26	R	S
CTGE5_HUMAN	Cutaneous T-cell lymphoma-associated antigen 5 OS=Homo sapiens GN=CTAGE5 PE=1 SV=4	LTDPHRAPSDTGSLSPPWDQDRR	3 Phospho (ST)	79.966332@T:11,79.966331@S:13,79.966331@S:15	2843.15	948.724	2843.15	948.723	0.0043	3	29.2	2.1	Elution from: 53.265 to 53.265 scan no 5125 cid35.00 polarity:+:MA10:m1s	53.265	2	26	R	M
CTGE5_HUMAN	Cutaneous T-cell lymphoma-associated antigen 5 OS=Homo sapiens GN=CTAGE5 PE=1 SV=4	LTDPHRAPSDTGSLSPPWDQDRR	3 Phospho (ST)	79.966331@S:9,79.966332@T:11,79.966331@S:13	2843.15	711.794	2843.15	711.794	0.0022	4	28.7	8.2	Elution from: 53.416 to 53.416 scan no 5142 cid35.00 polarity:+:MA10:m1s	53.416	2	26	R	M
CTNA1_HUMAN	Catenin alpha-1 OS=Homo sapiens GN=CTNNA1 PE=1 SV=1	TPEELDDSDFETEDFDVR	Phospho (ST)	79.966331@S:8	2237.85	1119.93	2237.85	1119.93	0.0021	2	114.2	36.5	Elution from: 66.442 to 66.442 scan no 6310 cid35.00 polarity:+:MA10:m1s	66.442	0	26	R	S
CTNA1_HUMAN	Catenin alpha-1 OS=Homo sapiens GN=CTNNA1 PE=1 SV=1	TPEELDDSDFETEDFDVR	Label:13C(6)15N(4) (R);Phospho (ST)	10.008269@R:18,79.966331@S:8	2247.86	1124.94	2247.86	1124.94	0.0034	2	105.1	40.2	Elution from: 67.254 to 67.254 scan no 6260 cid35.00 polarity:+:MA10:m1s	67.254	0	25	R	S
CTNA1_HUMAN	Catenin alpha-1 OS=Homo sapiens GN=CTNNA1 PE=1 SV=1	TPEELDDSDFETEDFDVR	Phospho (ST)	79.966332@T:1	2237.85	746.959	2237.85	746.958	0.0018	3	73.2	16.8	Elution from: 66.764 to 66.764 scan no 6224 cid35.00 polarity:+:MA10:m1s	66.764	0	26	R	S
CTNB1_HUMAN	Catenin beta-1 OS=Homo sapiens GN=CTNNB1 PE=1 SV=1	RTSMGGTQQQFVEGVR	2 Label:13C(6)15N(4) (R);Phospho (ST)	10.008269@R:1,10.008269@R:16,79.966331@S:3	1879.85	627.625	1879.85	627.624	0.0011	3	52	1.5	Elution from: 45.119 to 45.119 scan no 4224 cid35.00 polarity:+:MA10	45.119	1	26	R	M
CTNB1_HUMAN	Catenin beta-1 OS=Homo sapiens GN=CTNNB1 PE=1 SV=1	RTSMGGTQQQFVEGVR	2 Label:13C(6)15N(4) (R);Phospho (ST)	10.008269@R:1,10.008269@R:16,79.966332@T:7	1879.85	627.625	1879.85	627.624	0.0002	3	32	2.3	Elution from: 45.629 to 45.629 scan no 4166 cid35.00 polarity:+:MA10	45.629	1	26	R	M
CTND1_HUMAN	Catenin delta-1 OS=Homo sapiens GN=CTNND1 PE=1 SV=1	TLDRSGDLGDMEPLK	Label:13C(6)15N(4) (R);Label:2H(4) (K);Phospho (ST)	10.008269@R:4,4.025107@K:15,79.966331@S:5	1739.8	580.94	1739.8	580.94	-0.0009	3	43.1	7.2	Elution from: 53.386 to 53.386 scan no 4970 cid35.00 polarity:+:MA10:m1s	53.386	1	26	R	G
CTND1_HUMAN	Catenin delta-1 OS=Homo sapiens GN=CTNND1 PE=1 SV=1	SQSSHSYDDSTLPLIDR	Label:13C(6)15N(4) (R);Phospho (ST)	10.008269@R:17,79.966331@S:6	2009.86	670.962	2009.86	670.961	0.0027	3	43	2.6	Elution from: 54.027 to 54.027 scan no 5071 cid35.00 polarity:+:MA10:m1s	54.027	0	26	R	N
CTND1_HUMAN	Catenin delta-1 OS=Homo sapiens GN=CTNND1 PE=1 SV=1	GSLASLDSLRK	Label:13C(6)15N(4) (R);Label:2H(4) (K);Phospho (ST)	10.008269@R:10,4.025107@K:11,79.966331@S:5	1239.64	620.827	1239.64	620.827	0.0004	2	35.4	24.1	Elution from: 49.039 to 49.039 scan no 4609 cid35.00 polarity:+:MA10	49.039	1	25	R	G
CTND1_HUMAN	Catenin delta-1 OS=Homo sapiens GN=CTNND1 PE=1 SV=1	HYEDGYPGGSDNYGSLSR	Label:13C(6)15N(4) (R);Phospho (ST)	10.008269@R:18,79.966331@S:15	2062.79	688.605	2062.79	688.605	0.0003	3	31.7	12	Elution from: 44.791 to 44.791 scan no 4006 cid35.00 polarity:+:MA10:m1s	44.791	0	25	R	V
CTND1_HUMAN	Catenin delta-1 OS=Homo sapiens GN=CTNND1 PE=1 SV=1	GSLASLDSLRK	Label:13C(6)15N(4) (R);Label:2H(4) (K);2 Phospho (ST)	10.008269@R:10,4.025107@K:11,79.966331@S:5,79.966331@S:8	1319.61	660.811	1319.61	660.81	0.0009	2	29.6	18.9	Elution from: 52.840 to 52.840 scan no 4914 cid35.00 polarity:+:MA10	52.84	1	26	R	G
CTR9_HUMAN	RNA polymerase-associated protein CTR9 homolog OS=Homo sapiens GN=CTR9 PE=1 SV=1	KGGEFDEFVNDDTDDDLPISK	Phospho (ST)	79.966332@T:13	2435.01	1218.51	2435.01	1218.51	0.0012	2	121	73.5	Elution from: 64.266 to 64.266 scan no 6119 cid35.00 polarity:+:MA10:m1s	64.266	1	26	K	K
CTR9_HUMAN	RNA polymerase-associated protein CTR9 homolog OS=Homo sapiens GN=CTR9 PE=1 SV=1	KGGEFDEFVNDDTDDDLPISKK	Phospho (ST)	79.966332@T:13	2563.1	855.375	2563.1	855.374	0.0037	3	69.8	46.8	Elution from: 59.412 to 59.412 scan no 5693 cid35.00 polarity:+:MA10:m1s	59.412	2	26	K	K
CTR9_HUMAN	RNA polymerase-associated protein CTR9 homolog OS=Homo sapiens GN=CTR9 PE=1 SV=1	RHPKGEEGSDDDETENGPKPK	Phospho (ST)	79.966331@S:9	2401.02	601.262	2401.02	601.262	0.0004	4	64.7	33.4	Elution from: 23.333 to 23.333 scan no 1243 cid35.00 polarity:+:MA10:m1s	23.333	2	26	R	K
CTR9_HUMAN	RNA polymerase-associated protein CTR9 homolog OS=Homo sapiens GN=CTR9 PE=1 SV=1	HPKGEEGSDDDETENGPKPK	Phospho (ST)	79.966331@S:8	2244.92	749.313	2244.92	749.313	0.0013	3	54.9	31.3	Elution from: 24.140 to 24.140 scan no 1336 cid35.00 polarity:+:MA10:m1s	24.14	1	25	R	K
CTR9_HUMAN	RNA polymerase-associated protein CTR9 homolog OS=Homo sapiens GN=CTR9 PE=1 SV=1	KGGEFDEFVNDDTDDDLPISK	2 Label:2H(4) (K);Phospho (ST)	4.025107@K:1,4.025107@K:21,79.966332@T:13	2443.06	815.36	2443.06	815.359	0.0014	3	54.7	41.4	Elution from: 64.169 to 64.169 scan no 6110 cid35.00 polarity:+:MA10:m1s	64.169	1	26	K	K
CTR9_HUMAN	RNA polymerase-associated protein CTR9 homolog OS=Homo sapiens GN=CTR9 PE=1 SV=1	GGEFDEFVNDDTDDDLPISK	Phospho (ST)	79.966332@T:12	2306.91	769.978	2306.91	769.977	0.0018	3	53.8	36	Elution from: 69.038 to 69.038 scan no 6417 cid35.00 polarity:+:MA10:m1s	69.038	0	26	K	K
CTR9_HUMAN	RNA polymerase-associated protein CTR9 homolog OS=Homo sapiens GN=CTR9 PE=1 SV=1	RHPKGEEGSDDDETENGPKPK	Label:13C(6)15N(4) (R);3 Label:2H(4) (K);Phospho (ST)	10.008269@R:1,4.025107@K:4,4.025107@K:19,4.025107@K:21,79.966331@S:9	2423.1	606.783	2423.1	606.783	0.0014	4	48.2	26.9	Elution from: 23.760 to 23.760 scan no 1323 cid35.00 polarity:+:MA10:m1s	23.76	2	25	R	K
CTR9_HUMAN	RNA polymerase-associated protein CTR9 homolog OS=Homo sapiens GN=CTR9 PE=1 SV=1	HPKGEEGSDDDETENGPKPK	3 Label:2H(4) (K);Phospho (ST)	4.025107@K:3,4.025107@K:18,4.025107@K:20,79.966331@S:8	2257	753.339	2256.99	753.338	0.0039	3	44	25.7	Elution from: 24.178 to 24.178 scan no 1331 cid35.00 polarity:+:MA10:m1s	24.178	1	26	R	K
CTU2_HUMAN	Cytoplasmic tRNA 2-thiolation protein 2 OS=Homo sapiens GN=CTU2 PE=1 SV=1	DCLIEDSDDEAGQS	Carbamidomethyl (C);Phospho (ST)	57.021465@C:2,79.966331@S:7	1632.55	817.283	1632.55	817.282	0.0015	2	55.2	24.6	Elution from: 47.868 to 47.868 scan no 4375 cid35.00 polarity:+:MA10	47.868	0	25	R	-
CWC22_HUMAN	Pre-mRNA-splicing factor CWC22 homolog OS=Homo sapiens GN=CWC22 PE=1 SV=3	HSGSRSDEDRYQNGAER	Phospho (ST)	79.966331@S:6	2042.82	511.712	2042.82	511.712	0.0003	4	33.5	4.8	Elution from: 25.318 to 25.318 scan no 1473 cid35.00 polarity:+:MA10	25.318	2	25	K	R
CX026_HUMAN	UPF0368 protein Cxorf26 OS=Homo sapiens GN=CXorf26 PE=1 SV=1	GADSGEEKEEGINREDK	Phospho (ST)	79.966331@S:4	1941.8	648.273	1941.8	648.272	0.0007	3	41.4	31.5	Elution from: 27.824 to 27.824 scan no 1795 cid35.00 polarity:+:MA10	27.824	2	26	K	T
CX026_HUMAN	UPF0368 protein Cxorf26 OS=Homo sapiens GN=CXorf26 PE=1 SV=1	GADSGEEKEEGINREDK	Label:13C(6)15N(4) (R);2 Label:2H(4) (K);Phospho (ST)	10.008269@R:14,4.025107@K:8,4.025107@K:17,79.966331@S:4	1959.85	654.292	1959.85	654.292	-0.0001	3	39.8	34.3	Elution from: 27.668 to 27.668 scan no 1780 cid35.00 polarity:+:MA10	27.668	2	25	K	T
CXCR4_HUMAN	C-X-C chemokine receptor type 4 OS=Homo sapiens GN=CXCR4 PE=1 SV=1	RGGHSSVSTESESSSFHSS	Phospho (ST)	79.966331@S:14	2030.8	677.94	2030.8	677.94	0.0017	3	75	1	Elution from: 27.389 to 27.389 scan no 1853 cid35.00 polarity:+:MA10:m1s	27.389	1	26	K	-
CXCR4_HUMAN	C-X-C chemokine receptor type 4 OS=Homo sapiens GN=CXCR4 PE=1 SV=1	RGGHSSVSTESESSSFHSS	Phospho (ST)	79.966331@S:19	2030.8	677.94	2030.8	677.94	0.0016	3	71.4	0	Elution from: 27.959 to 27.959 scan no 1930 cid35.00 polarity:+:MA10:m1s	27.959	1	26	K	-
CXCR4_HUMAN	C-X-C chemokine receptor type 4 OS=Homo sapiens GN=CXCR4 PE=1 SV=1	RGGHSSVSTESESSSFHSS	Phospho (ST)	79.966331@S:15	2030.8	677.94	2030.8	677.94	0.0028	3	56.1	1	Elution from: 27.374 to 27.374 scan no 1829 cid35.00 polarity:+:MA10:m1s	27.374	1	26	K	-
CYTSB_HUMAN	Cytospin-B OS=Homo sapiens GN=SPECC1 PE=1 SV=1	CSTAGSSPNSVSELSLASLTEK	Carbamidomethyl (C);2 Phospho (ST)	57.021465@C:1,79.966331@S:6,79.966331@S:7	2383.99	795.67	2383.99	795.669	0.0028	3	83.3	1.6	Elution from: 70.047 to 70.047 scan no 6633 cid35.00 polarity:+:MA10:m1s	70.047	0	26	K	I
CYTSB_HUMAN	Cytospin-B OS=Homo sapiens GN=SPECC1 PE=1 SV=1	CSTAGSSPNSVSELSLASLTEK	Carbamidomethyl (C);2 Phospho (ST)	57.021465@C:1,79.966331@S:7,79.966331@S:10	2383.99	795.67	2383.99	795.669	0.0033	3	79.3	16.5	Elution from: 70.143 to 70.143 scan no 6516 cid35.00 polarity:+:MA10:m1s	70.143	0	26	K	I
DAB1_HUMAN	Disabled homolog 1 OS=Homo sapiens GN=DAB1 PE=1 SV=3	SSPQTDKPR	Label:2H(4) (K);Phospho (ST)	4.025107@K:7,79.966332@T:5	1098.5	367.174	1098.5	367.174	-0.0018	3	27.5	9.4	Elution from: 41.941 to 41.941 scan no 3750 cid35.00 polarity:+:MA10	41.941	0	25	R	Q
DAB2_HUMAN	Disabled homolog 2 OS=Homo sapiens GN=DAB2 PE=1 SV=3	SSPNPFVGSPPK	Phospho (ST)	79.966331@S:9	1292.58	647.298	1292.58	647.297	0.0006	2	41	28.3	Elution from: 48.915 to 48.915 scan no 4493 cid35.00 polarity:+:MA10	48.915	0	25	K	G
DC1L1_HUMAN	Cytoplasmic dynein 1 light intermediate chain 1 OS=Homo sapiens GN=DYNC1LI1 PE=1 SV=3	KPVTVSPTTPTSPTEGEAS	Phospho (ST)	79.966331@S:12	1964.9	983.458	1964.9	983.456	0.0035	2	63.9	1.4	Elution from: 39.012 to 39.012 scan no 3310 cid35.00 polarity:+:MA10:m1s	39.012	0	25	R	-
DC1L1_HUMAN	Cytoplasmic dynein 1 light intermediate chain 1 OS=Homo sapiens GN=DYNC1LI1 PE=1 SV=3	DFQEYVEPGEDFPASPQRR	Phospho (ST)	79.966331@S:15	2346	783.007	2346	783.006	0.0031	3	52.1	38.3	Elution from: 59.623 to 59.623 scan no 5580 cid35.00 polarity:+:MA10:m1s	59.623	1	26	R	N
DC1L2_HUMAN	Cytoplasmic dynein 1 light intermediate chain 2 OS=Homo sapiens GN=DYNC1LI2 PE=1 SV=1	DFQDYMEPEEGCQGSPQRR	Carbamidomethyl (C);Phospho (ST)	57.021465@C:12,79.966331@S:15	2407.92	803.648	2407.92	803.647	0.003	3	33.3	24.1	Elution from: 54.190 to 54.190 scan no 5059 cid35.00 polarity:+:MA10:m1s	54.19	1	25	K	G
DCAF6_HUMAN	DDB1- and CUL4-associated factor 6 OS=Homo sapiens GN=DCAF6 PE=1 SV=1	DSALQDTDDSDDDPVLIPGAR	2 Phospho (ST)	79.966332@T:7,79.966331@S:10	2373.93	1187.97	2373.93	1187.97	0.0029	2	56.8	12.1	Elution from: 66.933 to 66.933 scan no 6162 cid35.00 polarity:+:MA10:m1s	66.933	0	26	R	Y
DCAF6_HUMAN	DDB1- and CUL4-associated factor 6 OS=Homo sapiens GN=DCAF6 PE=1 SV=1	DSALQDTDDSDDDPVLIPGAR	2 Phospho (ST)	79.966331@S:2,79.966332@T:7	2373.93	792.317	2373.93	792.316	0.0025	3	53.9	12.5	Elution from: 66.904 to 66.904 scan no 6242 cid35.00 polarity:+:MA10:m1s	66.904	0	26	R	Y
DCAF6_HUMAN	DDB1- and CUL4-associated factor 6 OS=Homo sapiens GN=DCAF6 PE=1 SV=1	DSALQDTDDSDDDPVLIPGAR	2 Phospho (ST)	79.966331@S:2,79.966331@S:10	2373.93	1187.97	2373.93	1187.97	0.0047	2	50.6	0.2	Elution from: 67.134 to 67.134 scan no 6260 cid35.00 polarity:+:MA10:m1s	67.134	0	26	R	Y
DCAF6_HUMAN	DDB1- and CUL4-associated factor 6 OS=Homo sapiens GN=DCAF6 PE=1 SV=1	DSALQDTDDSDDDPVLIPGAR	Label:13C(6)15N(4) (R);2 Phospho (ST)	10.008269@R:21,79.966331@S:2,79.966331@S:10	2383.94	795.652	2383.93	795.652	0.0022	3	31	0	Elution from: 67.034 to 67.034 scan no 6169 cid35.00 polarity:+:MA10:m1s	67.034	0	25	R	Y
DCAF8_HUMAN	DDB1- and CUL4-associated factor 8 OS=Homo sapiens GN=DCAF8 PE=1 SV=1	VHDRSEEEEEEEEEEEEEQPR	Phospho (ST)	79.966331@S:5	2751.03	918.018	2751.03	918.017	0.0022	3	63.8	53.8	Elution from: 36.309 to 36.309 scan no 2940 cid35.00 polarity:+:MA10:m1s	36.309	1	25	R	R
DDB2_HUMAN	DNA damage-binding protein 2 OS=Homo sapiens GN=DDB2 PE=1 SV=1	RSRSPLELEPEAK	Phospho (ST)	79.966331@S:4	1590.78	531.266	1590.78	531.266	0	3	57.9	7.6	Elution from: 36.552 to 36.552 scan no 2981 cid35.00 polarity:+:MA10	36.552	2	26	K	K
DDX21_HUMAN	Nucleolar RNA helicase 2 OS=Homo sapiens GN=DDX21 PE=1 SV=5	NEEPSEEEIDAPKPK	Phospho (ST)	79.966331@S:5	1790.76	896.388	1790.76	896.388	0.0009	2	84.4	75.1	Elution from: 37.151 to 37.151 scan no 3115 cid35.00 polarity:+:MA10	37.151	0	25	K	K
DDX21_HUMAN	Nucleolar RNA helicase 2 OS=Homo sapiens GN=DDX21 PE=1 SV=5	KKEEPSQNDISPK	Phospho (ST)	79.966331@S:11	1578.73	790.372	1578.73	790.372	0.001	2	70.5	29.7	Elution from: 25.948 to 25.948 scan no 1556 cid35.00 polarity:+:MA10	25.948	2	25	K	T
DDX21_HUMAN	Nucleolar RNA helicase 2 OS=Homo sapiens GN=DDX21 PE=1 SV=5	KKEEPSQNDISPK	3 Label:2H(4) (K);Phospho (ST)	4.025107@K:1,4.025107@K:2,4.025107@K:13,79.966331@S:11	1590.81	796.411	1590.8	796.409	0.0032	2	69.2	46.5	Elution from: 25.908 to 25.908 scan no 1550 cid35.00 polarity:+:MA10:m1s	25.908	2	25	K	T
DDX21_HUMAN	Nucleolar RNA helicase 2 OS=Homo sapiens GN=DDX21 PE=1 SV=5	NEEPSEEEIDAPKPK	2 Label:2H(4) (K);Phospho (ST)	4.025107@K:13,4.025107@K:15,79.966331@S:5	1798.81	900.413	1798.81	900.413	0.001	2	67.1	54	Elution from: 36.243 to 36.243 scan no 3057 cid35.00 polarity:+:MA10:m1s	36.243	0	26	K	K
DDX21_HUMAN	Nucleolar RNA helicase 2 OS=Homo sapiens GN=DDX21 PE=1 SV=5	VTKNEEPSEEEIDAPKPK	3 Label:2H(4) (K);Phospho (ST)	4.025107@K:3,4.025107@K:16,4.025107@K:18,79.966331@S:8	2131.05	711.357	2131.05	711.356	0.0009	3	54.7	21.2	Elution from: 33.770 to 33.770 scan no 2719 cid35.00 polarity:+:MA10:m1s	33.77	1	26	K	K
DDX21_HUMAN	Nucleolar RNA helicase 2 OS=Homo sapiens GN=DDX21 PE=1 SV=5	VTKNEEPSEEEIDAPKPK	Phospho (ST)	79.966331@S:8	2118.97	707.332	2118.97	707.331	0.0019	3	41.4	18	Elution from: 34.279 to 34.279 scan no 2809 cid35.00 polarity:+:MA10	34.279	1	26	K	K
DDX21_HUMAN	Nucleolar RNA helicase 2 OS=Homo sapiens GN=DDX21 PE=1 SV=5	KKAEPSEVDMNSPK	3 Label:2H(4) (K);Oxidation (M);Phospho (ST)	4.025107@K:1,4.025107@K:2,4.025107@K:14,15.994915@M:10,79.966331@S:12	1666.8	556.608	1666.8	556.608	0.0005	3	34.5	20.1	Elution from: 24.244 to 24.244 scan no 1411 cid35.00 polarity:+:MA10	24.244	2	26	K	S
DDX21_HUMAN	Nucleolar RNA helicase 2 OS=Homo sapiens GN=DDX21 PE=1 SV=5	KKAEPSEVDMNSPK	Oxidation (M);Phospho (ST)	15.994915@M:10,79.966331@S:12	1654.73	552.583	1654.73	552.583	0.0015	3	31.2	15	Elution from: 24.309 to 24.309 scan no 1405 cid35.00 polarity:+:MA10	24.309	2	26	K	S
DDX24_HUMAN	ATP-dependent RNA helicase DDX24 OS=Homo sapiens GN=DDX24 PE=1 SV=1	AQAVSEEEEEEEGK	Phospho (ST)	79.966331@S:5	1642.63	822.32	1642.62	822.32	0.0012	2	78.3	74.7	Elution from: 33.541 to 33.541 scan no 2679 cid35.00 polarity:+:MA10	33.541	0	26	K	S
DDX24_HUMAN	ATP-dependent RNA helicase DDX24 OS=Homo sapiens GN=DDX24 PE=1 SV=1	AQAVSEEEEEEEGK	Label:2H(4) (K);Phospho (ST)	4.025107@K:14,79.966331@S:5	1646.65	824.333	1646.65	824.332	0.0008	2	73.7	64.3	Elution from: 33.761 to 33.761 scan no 2608 cid35.00 polarity:+:MA10	33.761	0	26	K	S
DDX24_HUMAN	ATP-dependent RNA helicase DDX24 OS=Homo sapiens GN=DDX24 PE=1 SV=1	SPGKAEAESDALPDDTVIESEALPSDIAAEAR	Phospho (ST)	79.966332@T:16	3333.52	1112.18	3333.51	1112.18	0.0054	3	55.5	2.8	Elution from: 70.014 to 70.014 scan no 6487 cid35.00 polarity:+:MA10:m1s	70.014	1	25	R	A
DDX24_HUMAN	ATP-dependent RNA helicase DDX24 OS=Homo sapiens GN=DDX24 PE=1 SV=1	SPGKAEAESDALPDDTVIESEALPSDIAAEAR	Phospho (ST)	79.966331@S:9	3333.52	1112.18	3333.51	1112.18	0.0041	3	45.9	1.6	Elution from: 69.533 to 69.533 scan no 6536 cid35.00 polarity:+:MA10:m1s	69.533	1	25	R	A
DDX4_HUMAN	Probable ATP-dependent RNA helicase DDX4 OS=Homo sapiens GN=DDX4 PE=1 SV=2	MLDMGFGPEMKKLISCPGMPSK	Carbamidomethyl (C);2 Oxidation (M);2 Phospho (ST)	57.021465@C:16,15.994915@M:1,15.994915@M:4,79.966331@S:15,79.966331@S:21	2645.09	662.28	2645.09	662.279	0.0024	4	27.2	18	Elution from: 26.373 to 26.373 scan no 1677 cid35.00 polarity:+:MA10:m1s	26.373	2	26	R	E
DDX51_HUMAN	ATP-dependent RNA helicase DDX51 OS=Homo sapiens GN=DDX51 PE=1 SV=3	VNDAEPGSPEAPQGK	Phospho (ST)	79.966331@S:8	1574.66	788.338	1574.66	788.338	0.0007	2	64	57.1	Elution from: 30.613 to 30.613 scan no 2198 cid35.00 polarity:+:MA10	30.613	0	25	R	R
DDX54_HUMAN	ATP-dependent RNA helicase DDX54 OS=Homo sapiens GN=DDX54 PE=1 SV=2	QKIDDRDSDEEGASDR	Phospho (ST)	79.966331@S:8	1914.76	639.261	1914.76	639.26	0.0017	3	43.5	28.1	Elution from: 26.691 to 26.691 scan no 1661 cid35.00 polarity:+:MA10:m1s	26.691	2	25	K	R
DDX54_HUMAN	ATP-dependent RNA helicase DDX54 OS=Homo sapiens GN=DDX54 PE=1 SV=2	GAASQARGSDSEDGEFEIQAEDDAR	2 Label:13C(6)15N(4) (R);2 Phospho (ST)	10.008269@R:7,10.008269@R:25,79.966331@S:9,79.966331@S:11	2790.06	931.027	2790.06	931.026	0.0024	3	42.3	7.8	Elution from: 52.242 to 52.242 scan no 4894 cid35.00 polarity:+:MA10:m1s	52.242	1	26	R	A
DDX54_HUMAN	ATP-dependent RNA helicase DDX54 OS=Homo sapiens GN=DDX54 PE=1 SV=2	GAASQARGSDSEDGEFEIQAEDDAR	2 Phospho (ST)	79.966331@S:4,79.966331@S:11	2770.04	924.355	2770.04	924.354	0.0042	3	42	0	Elution from: 51.845 to 51.845 scan no 4925 cid35.00 polarity:+:MA10:m1s	51.845	1	25	R	A
DDX54_HUMAN	ATP-dependent RNA helicase DDX54 OS=Homo sapiens GN=DDX54 PE=1 SV=2	GAASQARGSDSEDGEFEIQAEDDAR	2 Phospho (ST)	79.966331@S:9,79.966331@S:11	2770.04	924.355	2770.04	924.354	0.0043	3	39.6	2.3	Elution from: 52.734 to 52.734 scan no 5007 cid35.00 polarity:+:MA10:m1s	52.734	1	26	R	A
DDX55_HUMAN	ATP-dependent RNA helicase DDX55 OS=Homo sapiens GN=DDX55 PE=1 SV=3	TVDLGISDLEDDC	Carbamidomethyl (C);Phospho (ST)	57.021465@C:13,79.966331@S:7	1530.58	766.297	1530.58	766.297	0.0002	2	71.8	57.9	Elution from: 72.877 to 72.877 scan no 6712 cid35.00 polarity:+:MA10	72.877	0	26	K	-
DEK_HUMAN	Protein DEK OS=Homo sapiens GN=DEK PE=1 SV=1	EESEEEEDEDDEEEEEEEK	Label:2H(4) (K);Phospho (ST)	4.025107@K:19,79.966331@S:3	2468.81	1235.41	2468.81	1235.41	0.0051	2	99.9	89.4	Elution from: 35.613 to 35.613 scan no 2846 cid35.00 polarity:+:MA10:m1s	35.613	0	25	R	E
DEK_HUMAN	Protein DEK OS=Homo sapiens GN=DEK PE=1 SV=1	CPEILSDESSSDEDEKK	Carbamidomethyl (C);4 Phospho (ST)	57.021465@C:1,79.966331@S:6,79.966331@S:9,79.966331@S:10,79.966331@S:11	2286.7	1144.36	2286.7	1144.36	0.0049	2	39.6	39.6	Elution from: 45.656 to 45.656 scan no 4212 cid35.00 polarity:+:MA10:m1s	45.656	1	25	K	N
DEK_HUMAN	Protein DEK OS=Homo sapiens GN=DEK PE=1 SV=1	KESESEDSSDDEPLIK	4 Phospho (ST)	79.966331@S:3,79.966331@S:5,79.966331@S:8,79.966331@S:9	2126.67	1064.34	2126.67	1064.34	0.0019	2	37	30.5	Elution from: 50.869 to 50.869 scan no 4815 cid35.00 polarity:+:MA10	50.869	1	25	K	K
DEK_HUMAN	Protein DEK OS=Homo sapiens GN=DEK PE=1 SV=1	KESESEDSSDDEPLIK	2 Label:2H(4) (K);4 Phospho (ST)	4.025107@K:1,4.025107@K:16,79.966331@S:3,79.966331@S:5,79.966331@S:8,79.966331@S:9	2134.72	1068.37	2134.72	1068.37	0.0024	2	33.1	28.2	Elution from: 51.510 to 51.510 scan no 4766 cid35.00 polarity:+:MA10:m1s	51.51	1	26	K	K
DEK_HUMAN	Protein DEK OS=Homo sapiens GN=DEK PE=1 SV=1	KESESEDSSDDEPLIKK	4 Phospho (ST)	79.966331@S:3,79.966331@S:5,79.966331@S:8,79.966331@S:9	2254.76	1128.39	2254.76	1128.39	0.0022	2	31	26.5	Elution from: 43.840 to 43.840 scan no 4068 cid35.00 polarity:+:MA10:m1s	43.84	2	26	K	L
DEK_HUMAN	Protein DEK OS=Homo sapiens GN=DEK PE=1 SV=1	CPEILSDESSSDEDEKK	Carbamidomethyl (C);2 Label:2H(4) (K);4 Phospho (ST)	57.021465@C:1,4.025107@K:16,4.025107@K:17,79.966331@S:6,79.966331@S:9,79.966331@S:10,79.966331@S:11	2294.75	765.923	2294.75	765.923	0.0001	3	25.9	23.3	Elution from: 44.966 to 44.966 scan no 4170 cid35.00 polarity:+:MA10:m1s	44.966	1	25	K	N
DENR_HUMAN	Density-regulated protein OS=Homo sapiens GN=DENR PE=1 SV=2	LTVENSPKQEAGISEGQGTAGEEEEK	2 Label:2H(4) (K);Phospho (ST)	4.025107@K:8,4.025107@K:26,79.966331@S:6	2804.29	935.769	2804.28	935.769	0.002	3	113.1	14.8	Elution from: 41.651 to 41.651 scan no 3802 cid35.00 polarity:+:MA10:m1s	41.651	1	25	K	K
DENR_HUMAN	Density-regulated protein OS=Homo sapiens GN=DENR PE=1 SV=2	LTVENSPKQEAGISEGQGTAGEEEEK	Phospho (ST)	79.966332@T:2	2796.24	933.086	2796.23	933.085	0.0026	3	97.8	1.3	Elution from: 40.976 to 40.976 scan no 3724 cid35.00 polarity:+:MA10:m1s	40.976	1	26	K	K
DENR_HUMAN	Density-regulated protein OS=Homo sapiens GN=DENR PE=1 SV=2	LTVENSPKQEAGISEGQGTAGEEEEK	Phospho (ST)	79.966331@S:6	2796.24	933.086	2796.23	933.085	0.0021	3	77.3	2	Elution from: 41.287 to 41.287 scan no 3751 cid35.00 polarity:+:MA10:m1s	41.287	1	26	K	K
DESP_HUMAN	Desmoplakin OS=Homo sapiens GN=DSP PE=1 SV=3	GGGGYTCQSGSGWDEFTK	Carbamidomethyl (C);Label:2H(4) (K);Phospho (ST)	57.021465@C:7,4.025107@K:18,79.966331@S:9	1976.76	989.386	1976.76	989.385	0.003	2	59.1	9.7	Elution from: 58.821 to 58.821 scan no 5479 cid35.00 polarity:+:MA10:m1s	58.821	0	25	K	H
DESP_HUMAN	Desmoplakin OS=Homo sapiens GN=DSP PE=1 SV=3	GGGGYTCQSGSGWDEFTK	Carbamidomethyl (C);Label:2H(4) (K);Phospho (ST)	57.021465@C:7,4.025107@K:18,79.966331@S:11	1976.76	989.386	1976.76	989.385	0.0029	2	48.7	2.3	Elution from: 58.659 to 58.659 scan no 5601 cid35.00 polarity:+:MA10	58.659	0	25	K	H
DESP_HUMAN	Desmoplakin OS=Homo sapiens GN=DSP PE=1 SV=3	GGGGYTCQSGSGWDEFTK	Carbamidomethyl (C);Label:2H(4) (K);Phospho (ST)	57.021465@C:7,4.025107@K:18,79.966332@T:6	1976.76	989.386	1976.76	989.385	0.0026	2	27.5	2.2	Elution from: 58.404 to 58.404 scan no 5532 cid35.00 polarity:+:MA10:m1s	58.404	0	26	K	H
DHCR7_HUMAN	7-dehydrocholesterol reductase OS=Homo sapiens GN=DHCR7 PE=1 SV=1	SLDGVTNDR	Phospho (ST)	79.966331@S:1	1055.43	528.722	1055.43	528.722	0.0004	2	48.2	34.6	Elution from: 35.124 to 35.124 scan no 2912 cid35.00 polarity:+:MA10	35.124	0	26	K	T
DHCR7_HUMAN	7-dehydrocholesterol reductase OS=Homo sapiens GN=DHCR7 PE=1 SV=1	SLDGVTNDR	Label:13C(6)15N(4) (R);Phospho (ST)	10.008269@R:9,79.966331@S:1	1065.44	533.726	1065.44	533.726	0.0002	2	46.8	26.3	Elution from: 35.705 to 35.705 scan no 2864 cid35.00 polarity:+:MA10	35.705	0	26	K	T
DHCR7_HUMAN	7-dehydrocholesterol reductase OS=Homo sapiens GN=DHCR7 PE=1 SV=1	AKSLDGVTNDR	Label:13C(6)15N(4) (R);Label:2H(4) (K);Phospho (ST)	10.008269@R:11,4.025107@K:2,79.966331@S:3	1268.59	423.872	1268.59	423.872	0.0001	3	30.2	14.5	Elution from: 31.144 to 31.144 scan no 2237 cid35.00 polarity:+:MA10	31.144	1	26	K	T
DHX16_HUMAN	Putative pre-mRNA-splicing factor ATP-dependent RNA helicase DHX16 OS=Homo sapiens GN=DHX16 PE=1 SV=2	LLEDSEESSEETVSR	2 Phospho (ST)	79.966331@S:5,79.966331@S:9	1868.7	935.356	1868.7	935.356	0.0001	2	63.7	3.1	Elution from: 45.095 to 45.095 scan no 4108 cid35.00 polarity:+:MA10:m1s	45.095	0	25	R	A
DHX16_HUMAN	Putative pre-mRNA-splicing factor ATP-dependent RNA helicase DHX16 OS=Homo sapiens GN=DHX16 PE=1 SV=2	LLEDSEESSEETVSR	Label:13C(6)15N(4) (R);2 Phospho (ST)	10.008269@R:15,79.966331@S:5,79.966331@S:9	1878.71	940.361	1878.7	940.36	0.0016	2	61.3	7.5	Elution from: 45.245 to 45.245 scan no 4155 cid35.00 polarity:+:MA10	45.245	0	25	R	A
DHX16_HUMAN	Putative pre-mRNA-splicing factor ATP-dependent RNA helicase DHX16 OS=Homo sapiens GN=DHX16 PE=1 SV=2	LLEDSEESSEETVSR	2 Phospho (ST)	79.966331@S:5,79.966331@S:8	1868.7	935.356	1868.7	935.356	0.0019	2	56.1	9.6	Elution from: 45.204 to 45.204 scan no 4073 cid35.00 polarity:+:MA10	45.204	0	26	R	A
DHX16_HUMAN	Putative pre-mRNA-splicing factor ATP-dependent RNA helicase DHX16 OS=Homo sapiens GN=DHX16 PE=1 SV=2	LLEDSEESSEETVSR	Label:13C(6)15N(4) (R);2 Phospho (ST)	10.008269@R:15,79.966331@S:5,79.966331@S:8	1878.71	940.361	1878.7	940.36	0.0016	2	45.6	6.8	Elution from: 45.026 to 45.026 scan no 4224 cid35.00 polarity:+:MA10	45.026	0	26	R	A
DHX16_HUMAN	Putative pre-mRNA-splicing factor ATP-dependent RNA helicase DHX16 OS=Homo sapiens GN=DHX16 PE=1 SV=2	LLEDSEESSEETVSR	3 Phospho (ST)	79.966331@S:5,79.966331@S:8,79.966331@S:9	1948.67	975.34	1948.66	975.339	0.0034	2	33.9	20.2	Elution from: 47.089 to 47.089 scan no 4378 cid35.00 polarity:+:MA10:m1s	47.089	0	25	R	A
DHX16_HUMAN	Putative pre-mRNA-splicing factor ATP-dependent RNA helicase DHX16 OS=Homo sapiens GN=DHX16 PE=1 SV=2	QQTEKPESEDEWERTER	Phospho (ST)	79.966331@S:8	2255.94	752.986	2255.93	752.985	0.0021	3	32.9	15.6	Elution from: 36.093 to 36.093 scan no 3055 cid35.00 polarity:+:MA10:m1s	36.093	1	26	K	E
DHX16_HUMAN	Putative pre-mRNA-splicing factor ATP-dependent RNA helicase DHX16 OS=Homo sapiens GN=DHX16 PE=1 SV=2	YHMPKETRGQPAR	Oxidation (M);Phospho (Y)	15.994915@M:3,79.966331@Y:1	1665.75	417.445	1665.74	417.443	0.005	4	29.6	19.1	Elution from: 20.518 to 20.518 scan no 971 cid35.00 polarity:+:MA10	20.518	2	25	R	A
DHX16_HUMAN	Putative pre-mRNA-splicing factor ATP-dependent RNA helicase DHX16 OS=Homo sapiens GN=DHX16 PE=1 SV=2	LLEDSEESSEETVSR	Label:13C(6)15N(4) (R);3 Phospho (ST)	10.008269@R:15,79.966331@S:5,79.966331@S:8,79.966331@S:9	1958.67	980.343	1958.67	980.343	0.001	2	24.9	11.7	Elution from: 46.516 to 46.516 scan no 4370 cid35.00 polarity:+:MA10	46.516	0	26	R	A
DHX34_HUMAN	Probable ATP-dependent RNA helicase DHX34 OS=Homo sapiens GN=DHX34 PE=2 SV=2	LQEEQDGGSSDEDRAGPAPPGASDGVDIQDVK	2 Phospho (ST)	79.966331@S:9,79.966331@S:10	3398.38	1133.8	3398.38	1133.8	0.0016	3	81.1	46.3	Elution from: 52.918 to 52.918 scan no 5094 cid35.00 polarity:+:MA10:m1s	52.918	1	26	R	F
DIDO1_HUMAN	Death-inducer obliterator 1 OS=Homo sapiens GN=DIDO1 PE=1 SV=5	QEAIPDLEDSPPVSDSEEQQESAR	2 Phospho (ST)	79.966331@S:10,79.966331@S:14	2815.12	939.379	2815.11	939.378	0.0042	3	60.2	15.2	Elution from: 57.876 to 57.876 scan no 5424 cid35.00 polarity:+:MA10:m1s	57.876	0	26	R	A
DIDO1_HUMAN	Death-inducer obliterator 1 OS=Homo sapiens GN=DIDO1 PE=1 SV=5	VKGGDDHDDTSDSDSDGLTLK	2 Label:2H(4) (K);3 Phospho (ST)	4.025107@K:2,4.025107@K:21,79.966332@T:10,79.966331@S:11,79.966331@S:13	2423.89	808.971	2423.89	808.97	0.0007	3	44.6	11.6	Elution from: 43.369 to 43.369 scan no 3940 cid35.00 polarity:+:MA10:m1s	43.369	1	25	K	E
DIDO1_HUMAN	Death-inducer obliterator 1 OS=Homo sapiens GN=DIDO1 PE=1 SV=5	VKGGDDHDDTSDSDSDGLTLK	3 Phospho (ST)	79.966332@T:10,79.966331@S:11,79.966331@S:13	2415.84	806.288	2415.84	806.287	0.0018	3	38.6	11.5	Elution from: 43.065 to 43.065 scan no 3957 cid35.00 polarity:+:MA10:m1s	43.065	1	26	K	E
DIDO1_HUMAN	Death-inducer obliterator 1 OS=Homo sapiens GN=DIDO1 PE=1 SV=5	GGDDHDDTSDSDSDGLTLK	Label:2H(4) (K);3 Phospho (ST)	4.025107@K:19,79.966332@T:8,79.966331@S:11,79.966331@S:13	2192.7	731.908	2192.7	731.908	0.0021	3	17.7	0.5	Elution from: 48.094 to 48.094 scan no 4412 cid35.00 polarity:+:MA10:m1s	48.094	0	26	K	E
DKC1_HUMAN	H/ACA ribonucleoprotein complex subunit 4 OS=Homo sapiens GN=DKC1 PE=1 SV=3	AGLESGAEPGDGDSDTTKK	2 Label:2H(4) (K);Phospho (ST)	4.025107@K:18,4.025107@K:19,79.966331@S:14	1921.84	641.62	1921.84	641.62	0	3	80.6	12.4	Elution from: 31.366 to 31.366 scan no 2268 cid35.00 polarity:+:MA10	31.366	1	26	K	K
DKC1_HUMAN	H/ACA ribonucleoprotein complex subunit 4 OS=Homo sapiens GN=DKC1 PE=1 SV=3	AGLESGAEPGDGDSDTTK	Phospho (ST)	79.966331@S:14	1785.7	893.855	1785.69	893.854	0.0014	2	79.8	21.4	Elution from: 34.864 to 34.864 scan no 2859 cid35.00 polarity:+:MA10	34.864	0	26	K	K
DKC1_HUMAN	H/ACA ribonucleoprotein complex subunit 4 OS=Homo sapiens GN=DKC1 PE=1 SV=3	AGLESGAEPGDGDSDTTK	Label:2H(4) (K);Phospho (ST)	4.025107@K:18,79.966331@S:14	1789.72	895.867	1789.72	895.867	0.0011	2	70.9	21.8	Elution from: 35.194 to 35.194 scan no 2789 cid35.00 polarity:+:MA10	35.194	0	26	K	K
DKC1_HUMAN	H/ACA ribonucleoprotein complex subunit 4 OS=Homo sapiens GN=DKC1 PE=1 SV=3	AGLESGAEPGDGDSDTTKK	Phospho (ST)	79.966331@S:14	1913.79	957.903	1913.79	957.902	0.002	2	65	18.3	Elution from: 31.810 to 31.810 scan no 2368 cid35.00 polarity:+:MA10:m1s	31.81	1	25	K	K
DKC1_HUMAN	H/ACA ribonucleoprotein complex subunit 4 OS=Homo sapiens GN=DKC1 PE=1 SV=3	AGLESGAEPGDGDSDTTKK	2 Label:2H(4) (K);2 Phospho (ST)	4.025107@K:18,4.025107@K:19,79.966331@S:5,79.966331@S:14	2001.81	668.276	2001.81	668.276	0.0016	3	60.5	13.2	Elution from: 34.327 to 34.327 scan no 2688 cid35.00 polarity:+:MA10:m1s	34.327	1	26	K	K
DKC1_HUMAN	H/ACA ribonucleoprotein complex subunit 4 OS=Homo sapiens GN=DKC1 PE=1 SV=3	AGLESGAEPGDGDSDTTK	2 Phospho (ST)	79.966331@S:5,79.966331@S:14	1865.66	933.838	1865.66	933.838	0.0011	2	60.5	11.6	Elution from: 38.340 to 38.340 scan no 3274 cid35.00 polarity:+:MA10	38.34	0	25	K	K
DKC1_HUMAN	H/ACA ribonucleoprotein complex subunit 4 OS=Homo sapiens GN=DKC1 PE=1 SV=3	AGLESGAEPGDGDSDTTK	Label:2H(4) (K);2 Phospho (ST)	4.025107@K:18,79.966331@S:5,79.966331@S:14	1869.69	935.851	1869.69	935.85	0.0008	2	52.2	21.8	Elution from: 38.442 to 38.442 scan no 3237 cid35.00 polarity:+:MA10:m1s	38.442	0	25	K	K
DKC1_HUMAN	H/ACA ribonucleoprotein complex subunit 4 OS=Homo sapiens GN=DKC1 PE=1 SV=3	AGLESGAEPGDGDSDTTKK	Phospho (ST)	79.966332@T:17	1913.79	638.937	1913.79	638.937	0.0008	3	48	0	Elution from: 31.321 to 31.321 scan no 2259 cid35.00 polarity:+:MA10:m1s	31.321	1	25	K	K
DKC1_HUMAN	H/ACA ribonucleoprotein complex subunit 4 OS=Homo sapiens GN=DKC1 PE=1 SV=3	KRESESESDETPPAAPQLIK	Label:13C(6)15N(4) (R);2 Label:2H(4) (K);2 Phospho (ST)	10.008269@R:2,4.025107@K:1,4.025107@K:20,79.966331@S:6,79.966331@S:8	2389.09	797.372	2389.09	797.372	0.0008	3	41.6	7.3	Elution from: 46.313 to 46.313 scan no 4327 cid35.00 polarity:+:MA10:m1s	46.313	2	25	R	K
DKC1_HUMAN	H/ACA ribonucleoprotein complex subunit 4 OS=Homo sapiens GN=DKC1 PE=1 SV=3	KRESESESDETPPAAPQLIK	3 Phospho (ST)	79.966331@S:4,79.966331@S:6,79.966331@S:8	2451	818.009	2451	818.008	0.0032	3	40.7	17	Elution from: 48.710 to 48.710 scan no 4510 cid35.00 polarity:+:MA10:m1s	48.71	2	25	R	K
DKC1_HUMAN	H/ACA ribonucleoprotein complex subunit 4 OS=Homo sapiens GN=DKC1 PE=1 SV=3	AKEVELVSE	Label:2H(4) (K);Phospho (ST)	4.025107@K:2,79.966331@S:8	1086.51	544.265	1086.51	544.265	0	2	40	29.4	Elution from: 40.411 to 40.411 scan no 3673 cid35.00 polarity:+:MA10	40.411	1	26	K	-
DKC1_HUMAN	H/ACA ribonucleoprotein complex subunit 4 OS=Homo sapiens GN=DKC1 PE=1 SV=3	AGLESGAEPGDGDSDTTKK	2 Phospho (ST)	79.966331@S:5,79.966331@S:14	1993.76	665.593	1993.76	665.592	0.0012	3	37.6	6.8	Elution from: 34.643 to 34.643 scan no 2765 cid35.00 polarity:+:MA10	34.643	1	25	K	K
DKC1_HUMAN	H/ACA ribonucleoprotein complex subunit 4 OS=Homo sapiens GN=DKC1 PE=1 SV=3	KRESESESDETPPAAPQLIK	2 Phospho (ST)	79.966331@S:4,79.966331@S:6	2371.04	791.353	2371.03	791.352	0.0017	3	37	9.5	Elution from: 45.951 to 45.951 scan no 4166 cid35.00 polarity:+:MA10:m1s	45.951	2	26	R	K
DKC1_HUMAN	H/ACA ribonucleoprotein complex subunit 4 OS=Homo sapiens GN=DKC1 PE=1 SV=3	AKEVELVSE	Phospho (ST)	79.966331@S:8	1082.49	542.252	1082.49	542.252	0.0002	2	35.9	29	Elution from: 40.639 to 40.639 scan no 3659 cid35.00 polarity:+:MA10	40.639	1	26	K	-
DKC1_HUMAN	H/ACA ribonucleoprotein complex subunit 4 OS=Homo sapiens GN=DKC1 PE=1 SV=3	KRESESESDETPPAAPQLIK	Label:13C(6)15N(4) (R);2 Label:2H(4) (K);3 Phospho (ST)	10.008269@R:2,4.025107@K:1,4.025107@K:20,79.966331@S:4,79.966331@S:6,79.966331@S:8	2469.06	824.028	2469.06	824.027	0.0026	3	34.3	8.7	Elution from: 48.703 to 48.703 scan no 4562 cid35.00 polarity:+:MA10:m1s	48.703	2	25	R	K
DKC1_HUMAN	H/ACA ribonucleoprotein complex subunit 4 OS=Homo sapiens GN=DKC1 PE=1 SV=3	EVELVSE	Phospho (ST)	79.966331@S:6	883.358	442.686	883.358	442.686	0.0002	2	28.2	20.9	Elution from: 46.581 to 46.581 scan no 4354 cid35.00 polarity:+:MA10	46.581	0	25	K	-
DLG5_HUMAN	Disks large homolog 5 OS=Homo sapiens GN=DLG5 PE=1 SV=4	LGSSSNLQFK	Phospho (ST)	79.966331@S:3	1159.53	580.77	1159.53	580.771	-0.0011	2	55.4	17	Elution from: 48.034 to 48.034 scan no 4496 cid35.00 polarity:+:MA10	48.034	0	25	R	A
DNJA2_HUMAN	DnaJ homolog subfamily A member 2 OS=Homo sapiens GN=DNAJA2 PE=1 SV=1	EAYNDSSDEESSSHHGPGVQCAHQ	Carbamidomethyl (C);2 Phospho (ST)	57.021465@C:21,79.966331@S:6,79.966331@S:7	2786.96	929.993	2786.95	929.992	0.0025	3	51.2	18.1	Elution from: 33.413 to 33.413 scan no 2596 cid35.00 polarity:+:MA10:m1s	33.413	0	25	R	-
DNJC1_HUMAN	DnaJ homolog subfamily C member 1 OS=Homo sapiens GN=DNAJC1 PE=1 SV=1	DFDIAEQNESSDEESLRK	2 Phospho (ST)	79.966331@S:10,79.966331@S:11	2270.86	757.962	2270.86	757.961	0.0024	3	39.8	7.4	Elution from: 54.307 to 54.307 scan no 5220 cid35.00 polarity:+:MA10:m1s	54.307	1	26	K	E
DNJC1_HUMAN	DnaJ homolog subfamily C member 1 OS=Homo sapiens GN=DNAJC1 PE=1 SV=1	DFDIAEQNESSDEESLRK	Label:13C(6)15N(4) (R);Label:2H(4) (K);2 Phospho (ST)	10.008269@R:17,4.025107@K:18,79.966331@S:10,79.966331@S:11	2284.9	762.639	2284.9	762.639	0.0013	3	34.1	12.9	Elution from: 54.656 to 54.656 scan no 5134 cid35.00 polarity:+:MA10:m1s	54.656	1	26	K	E
DNJC1_HUMAN	DnaJ homolog subfamily C member 1 OS=Homo sapiens GN=DNAJC1 PE=1 SV=1	DFDIAEQNESSDEESLRK	Label:13C(6)15N(4) (R);Label:2H(4) (K);2 Phospho (ST)	10.008269@R:17,4.025107@K:18,79.966331@S:11,79.966331@S:15	2284.9	762.639	2284.9	762.639	0.001	3	33.6	2.5	Elution from: 54.091 to 54.091 scan no 5137 cid35.00 polarity:+:MA10:m1s	54.091	1	26	K	E
DNLI1_HUMAN	DNA ligase 1 OS=Homo sapiens GN=LIG1 PE=1 SV=1	VLGSEGEEEDEALSPAK	Label:2H(4) (K);2 Phospho (ST)	4.025107@K:17,79.966331@S:4,79.966331@S:14	1922.78	962.395	1922.77	962.394	0.0028	2	78.2	72.3	Elution from: 49.066 to 49.066 scan no 4696 cid35.00 polarity:+:MA10	49.066	0	26	R	G
DNLI1_HUMAN	DNA ligase 1 OS=Homo sapiens GN=LIG1 PE=1 SV=1	VLGSEGEEEDEALSPAK	2 Phospho (ST)	79.966331@S:4,79.966331@S:14	1918.75	960.382	1918.75	960.382	0.0016	2	76.8	69.5	Elution from: 49.395 to 49.395 scan no 4600 cid35.00 polarity:+:MA10	49.395	0	26	R	G
DNLI1_HUMAN	DNA ligase 1 OS=Homo sapiens GN=LIG1 PE=1 SV=1	RTIQEVLEEQSEDEDREAK	2 Label:13C(6)15N(4) (R);Label:2H(4) (K);Phospho (ST)	10.008269@R:1,10.008269@R:16,4.025107@K:19,79.966331@S:11	2407.1	803.373	2407.1	803.372	0.0011	3	59.2	49.4	Elution from: 50.621 to 50.621 scan no 4700 cid35.00 polarity:+:MA10:m1s	50.621	2	25	K	R
DNLI1_HUMAN	DNA ligase 1 OS=Homo sapiens GN=LIG1 PE=1 SV=1	RTIQEVLEEQSEDEDREAK	Phospho (ST)	79.966331@S:11	2383.06	795.36	2383.05	795.359	0.0034	3	51.3	37.8	Elution from: 50.414 to 50.414 scan no 4700 cid35.00 polarity:+:MA10:m1s	50.414	2	26	K	R
DNLI3_HUMAN	DNA ligase 3 OS=Homo sapiens GN=LIG3 PE=1 SV=2	LTTTGQVTSPVK	Label:2H(4) (K);Phospho (ST)	4.025107@K:12,79.966331@S:9	1314.67	658.344	1314.67	658.344	0.0002	2	43.7	11.9	Elution from: 35.615 to 35.615 scan no 2870 cid35.00 polarity:+:MA10	35.615	0	26	K	G
DNLI3_HUMAN	DNA ligase 3 OS=Homo sapiens GN=LIG3 PE=1 SV=2	LTTTGQVTSPVK	Phospho (ST)	79.966331@S:9	1310.65	656.331	1310.65	656.331	-0.0008	2	32	8.5	Elution from: 35.432 to 35.432 scan no 2940 cid35.00 polarity:+:MA10	35.432	0	26	K	G
DNLI3_HUMAN	DNA ligase 3 OS=Homo sapiens GN=LIG3 PE=1 SV=2	RSLSSSKCDPR	Carbamidomethyl (C);4 Phospho (ST)	57.021465@C:8,79.966331@S:2,79.966331@S:4,79.966331@S:5,79.966331@S:6	1611.5	538.173	1611.5	538.172	0.0027	3	25.6	21.2	Elution from: 39.861 to 39.861 scan no 3562 cid35.00 polarity:+:MA10	39.861	2	25	K	H
DOP2_HUMAN	Protein dopey-2 OS=Homo sapiens GN=DOPEY2 PE=1 SV=5	SSESPSSSPSSPARK	Label:13C(6)15N(4) (R);Label:2H(4) (K);3 Phospho (ST)	10.008269@R:14,4.025107@K:15,79.966331@S:2,79.966331@S:4,79.966331@S:6	1743.63	436.914	1743.63	436.916	-0.0044	4	21.6	5.3	Elution from: 23.957 to 23.957 scan no 1297 cid35.00 polarity:+:MA10	23.957	1	25	K	N
DPOD3_HUMAN	DNA polymerase delta subunit 3 OS=Homo sapiens GN=POLD3 PE=1 SV=2	RVALSDDETK	Phospho (ST)	79.966331@S:5	1212.54	607.277	1212.54	607.277	0.0006	2	50.7	26.7	Elution from: 29.967 to 29.967 scan no 2092 cid35.00 polarity:+:MA10	29.967	1	26	K	E
DPS1_HUMAN	Decaprenyl-diphosphate synthase subunit 1 OS=Homo sapiens GN=PDSS1 PE=1 SV=1	EISKLRPSPER	Label:13C(6)15N(4) (R);Phospho (ST)	10.008269@R:11,79.966331@S:3	1400.7	351.183	1400.71	351.184	-0.0012	4	29.6	19	Elution from: 21.004 to 21.004 scan no 988 cid35.00 polarity:+:MA10	21.004	1	25	R	D
DPYL3_HUMAN	Dihydropyrimidinase-related protein 3 OS=Homo sapiens GN=DPYSL3 PE=1 SV=1	SNITSLS	3 Phospho (ST)	79.966331@S:1,79.966332@T:4,79.966331@S:5	960.266	321.096	960.264	321.095	0.0017	3	13.8	9.6	Elution from: 39.771 to 39.771 scan no 3473 cid35.00 polarity:+:MA10:m1s	39.771	0	25	R	-
DREB_HUMAN	Drebrin OS=Homo sapiens GN=DBN1 PE=1 SV=4	LSSPVLHR	Label:13C(6)15N(4) (R);Phospho (ST)	10.008269@R:8,79.966331@S:3	997.498	333.507	997.499	333.507	-0.0002	3	51.5	19.9	Elution from: 32.579 to 32.579 scan no 2543 cid35.00 polarity:+:MA10	32.579	0	26	R	L
DREB_HUMAN	Drebrin OS=Homo sapiens GN=DBN1 PE=1 SV=4	LSSPVLHR	Phospho (ST)	79.966331@S:3	987.49	330.171	987.49	330.171	-0.0004	3	32.4	8.1	Elution from: 33.177 to 33.177 scan no 2561 cid35.00 polarity:+:MA10	33.177	0	25	R	L
DSN1_HUMAN	Kinetochore-associated protein DSN1 homolog OS=Homo sapiens GN=DSN1 PE=1 SV=2	IHLGSSPKK	Phospho (ST)	79.966331@S:5	1045.53	349.518	1045.53	349.518	0.0003	3	27.7	8.7	Elution from: 25.848 to 25.848 scan no 1637 cid35.00 polarity:+:MA10	25.848	1	26	R	G
DSRAD_HUMAN	Double-stranded RNA-specific adenosine deaminase OS=Homo sapiens GN=ADAR PE=1 SV=4	SVTLGYLFSQGHLTRAICCR	2 Carbamidomethyl (C);2 Label:13C(6)15N(4) (R);3 Phospho (ST);Phospho (Y)	57.021465@C:18,57.021465@C:19,10.008269@R:15,10.008269@R:20,79.966331@S:1,79.966332@T:3,79.966331@S:9,79.966331@Y:6	2678.04	670.518	2678.05	670.52	-0.0063	4	27.5	15.9	Elution from: 56.665 to 56.665 scan no 5413 cid35.00 polarity:+:MA10:m1s	56.665	1	25	K	V
DTD1_HUMAN	D-tyrosyl-tRNA(Tyr) deacylase 1 OS=Homo sapiens GN=DTD1 PE=1 SV=2	SASSGAEGDVSSEREP	Phospho (ST)	79.966331@S:4	1643.63	822.823	1643.63	822.823	0.0009	2	78.3	5	Elution from: 35.369 to 35.369 scan no 2835 cid35.00 polarity:+:MA10	35.369	1	26	R	-
DTD1_HUMAN	D-tyrosyl-tRNA(Tyr) deacylase 1 OS=Homo sapiens GN=DTD1 PE=1 SV=2	SASSGAEGDVSSEREP	Label:13C(6)15N(4) (R);Phospho (ST)	10.008269@R:14,79.966331@S:4	1653.64	827.828	1653.64	827.827	0.0014	2	74.7	11.6	Elution from: 35.362 to 35.362 scan no 2834 cid35.00 polarity:+:MA10	35.362	1	26	R	-
DUS3L_HUMAN	tRNA-dihydrouridine(47) synthase [NAD(P)(+)]-like OS=Homo sapiens GN=DUS3L PE=1 SV=2	QENCGAQQVPAGPGTSTPPSSPVR	Carbamidomethyl (C);2 Phospho (ST)	57.021465@C:4,79.966331@S:16,79.966331@S:21	2581.07	861.364	2581.07	861.363	0.0039	3	40.9	0	Elution from: 41.515 to 41.515 scan no 3637 cid35.00 polarity:+:MA10:m1s	41.515	0	25	R	T
DYH17_HUMAN	Dynein heavy chain 17, axonemal OS=Homo sapiens GN=DNAH17 PE=2 SV=2	NIYECPVYKTR	Carbamidomethyl (C);Label:13C(6)15N(4) (R);Label:2H(4) (K);Phospho (ST);Phospho (Y)	57.021465@C:5,10.008269@R:11,4.025107@K:9,79.966332@T:10,79.966331@Y:3	1615.67	404.925	1615.67	404.924	0.0023	4	29.2	15.1	Elution from: 22.662 to 22.662 scan no 1196 cid35.00 polarity:+:MA10:m1s	22.662	1	26	K	I
DYR1A_HUMAN	Dual specificity tyrosine-phosphorylation-regulated kinase 1A OS=Homo sapiens GN=DYRK1A PE=1 SV=2	IYQYIQSR	Phospho (Y)	79.966331@Y:4	1149.52	575.769	1149.52	575.768	0.0009	2	40.9	18.1	Elution from: 38.034 to 38.034 scan no 3215 cid35.00 polarity:+:MA10	38.034	0	26	R	F
DYR1A_HUMAN	Dual specificity tyrosine-phosphorylation-regulated kinase 1A OS=Homo sapiens GN=DYRK1A PE=1 SV=2	IYQYIQSR	Label:13C(6)15N(4) (R);Phospho (Y)	10.008269@R:8,79.966331@Y:4	1159.53	580.773	1159.53	580.772	0.0006	2	35.8	18.4	Elution from: 38.097 to 38.097 scan no 3224 cid35.00 polarity:+:MA10	38.097	0	26	R	F
DYTN_HUMAN	Dystrotelin OS=Homo sapiens GN=DYTN PE=2 SV=1	GGYDSGPRMTRR	Phospho (ST);Phospho (Y)	79.966331@S:5,79.966331@Y:3	1511.57	504.865	1511.57	504.865	-0.0024	3	24	8.6	Elution from: 37.347 to 37.347 scan no 3140 cid35.00 polarity:+:MA10	37.347	2	25	R	V
E41L1_HUMAN	Band 4.1-like protein 1 OS=Homo sapiens GN=EPB41L1 PE=1 SV=2	SLPELDRDKSDSDTEGLLFSR	2 Phospho (ST)	79.966331@S:10,79.966331@S:12	2539.09	847.371	2539.09	847.37	0.0034	3	43.4	11.1	Elution from: 65.243 to 65.243 scan no 6196 cid35.00 polarity:+:MA10:m1s	65.243	2	26	R	D
E41L1_HUMAN	Band 4.1-like protein 1 OS=Homo sapiens GN=EPB41L1 PE=1 SV=2	SLSPIIGK	Phospho (ST)	79.966331@S:3	893.462	447.738	893.462	447.738	-0.0001	2	37	17.7	Elution from: 48.104 to 48.104 scan no 4537 cid35.00 polarity:+:MA10	48.104	0	26	R	D
E41L1_HUMAN	Band 4.1-like protein 1 OS=Homo sapiens GN=EPB41L1 PE=1 SV=2	SLSPIIGK	Label:2H(4) (K);Phospho (ST)	4.025107@K:8,79.966331@S:3	897.487	449.751	897.487	449.751	-0.0003	2	35.4	21	Elution from: 48.490 to 48.490 scan no 4491 cid35.00 polarity:+:MA10	48.49	0	26	R	D
E41L1_HUMAN	Band 4.1-like protein 1 OS=Homo sapiens GN=EPB41L1 PE=1 SV=2	RLPSSPASPSPKGTPEK	2 Phospho (ST)	79.966331@S:10,79.966332@T:14	1894.86	632.627	1894.86	632.627	0.0008	3	32.7	6.8	Elution from: 32.173 to 32.173 scan no 2490 cid35.00 polarity:+:MA10:m1s	32.173	2	26	R	A
E41L2_HUMAN	Band 4.1-like protein 2 OS=Homo sapiens GN=EPB41L2 PE=1 SV=1	SYTLVVAK	Label:2H(4) (K);Phospho (ST)	4.025107@K:8,79.966331@S:1	963.498	482.756	963.498	482.756	-0.0004	2	37.4	9.7	Elution from: 47.121 to 47.121 scan no 4276 cid35.00 polarity:+:MA10	47.121	0	25	K	D
E41L2_HUMAN	Band 4.1-like protein 2 OS=Homo sapiens GN=EPB41L2 PE=1 SV=1	SYTLVVAK	Phospho (Y)	79.966331@Y:2	959.474	480.744	959.473	480.744	0.0007	2	33.3	0	Elution from: 47.164 to 47.164 scan no 4408 cid35.00 polarity:+:MA10	47.164	0	26	K	D
E41L2_HUMAN	Band 4.1-like protein 2 OS=Homo sapiens GN=EPB41L2 PE=1 SV=1	SYTLVVAK	Label:2H(4) (K);Phospho (Y)	4.025107@K:8,79.966331@Y:2	963.499	482.757	963.498	482.756	0.0007	2	27.8	0	Elution from: 47.513 to 47.513 scan no 4453 cid35.00 polarity:+:MA10	47.513	0	25	K	D
EAPP_HUMAN	E2F-associated phosphoprotein OS=Homo sapiens GN=EAPP PE=1 SV=4	YYDDIYFDSDSEDEDRAVQVTK	Label:13C(6)15N(4) (R);Label:2H(4) (K);2 Phospho (ST)	10.008269@R:16,4.025107@K:22,79.966331@S:9,79.966331@S:11	2846.11	949.71	2846.11	949.709	0.0022	3	73.8	28	Elution from: 63.710 to 63.710 scan no 5988 cid35.00 polarity:+:MA10:m1s	63.71	1	26	R	K
EAPP_HUMAN	E2F-associated phosphoprotein OS=Homo sapiens GN=EAPP PE=1 SV=4	YYDDIYFDSDSEDEDRAVQVTK	2 Phospho (ST)	79.966331@S:9,79.966331@S:11	2832.08	945.033	2832.07	945.032	0.0034	3	62.4	11.8	Elution from: 63.798 to 63.798 scan no 5942 cid35.00 polarity:+:MA10:m1s	63.798	1	25	R	K
EAPP_HUMAN	E2F-associated phosphoprotein OS=Homo sapiens GN=EAPP PE=1 SV=4	YYDDIYFDSDSEDEDRAVQVTK	2 Phospho (ST)	79.966331@S:9,79.966332@T:21	2832.08	945.033	2832.07	945.032	0.0042	3	45.3	5.6	Elution from: 63.772 to 63.772 scan no 5968 cid35.00 polarity:+:MA10:m1s	63.772	1	26	R	K
EF1B_HUMAN	Elongation factor 1-beta OS=Homo sapiens GN=EEF1B2 PE=1 SV=3	DDDDIDLFGSDDEEESEEAK	Label:2H(4) (K);Phospho (ST)	4.025107@K:20,79.966331@S:10	2355.86	1178.94	2355.86	1178.94	0.0028	2	77	42.7	Elution from: 66.194 to 66.194 scan no 6089 cid35.00 polarity:+:MA10:m1s	66.194	0	26	K	R
EF1D_HUMAN	Elongation factor 1-delta OS=Homo sapiens GN=EEF1D PE=1 SV=5	KPATPAEDDEDDDIDLFGSDNEEEDK	2 Label:2H(4) (K);Phospho (ST)	4.025107@K:1,4.025107@K:26,79.966331@S:19	2996.21	999.744	2996.21	999.743	0.0031	3	108.9	69.1	Elution from: 57.396 to 57.396 scan no 5484 cid35.00 polarity:+:MA10:m1s	57.396	0	25	K	E
EF1D_HUMAN	Elongation factor 1-delta OS=Homo sapiens GN=EEF1D PE=1 SV=5	KPATPAEDDEDDDIDLFGSDNEEEDK	Phospho (ST)	79.966331@S:19	2988.16	1495.09	2988.16	1495.09	0.0032	2	95.4	65.6	Elution from: 58.342 to 58.342 scan no 5602 cid35.00 polarity:+:MA10:m1s	58.342	0	26	K	E
EF1D_HUMAN	Elongation factor 1-delta OS=Homo sapiens GN=EEF1D PE=1 SV=5	KPATPAEDDEDDDIDLFGSDNEEEDK	2 Label:2H(4) (K);2 Phospho (ST)	4.025107@K:1,4.025107@K:26,79.966332@T:4,79.966331@S:19	3076.17	1026.4	3076.17	1026.4	0.0019	3	92.9	79.1	Elution from: 61.576 to 61.576 scan no 5689 cid35.00 polarity:+:MA10:m1s	61.576	0	25	K	E
EF1D_HUMAN	Elongation factor 1-delta OS=Homo sapiens GN=EEF1D PE=1 SV=5	KPATPAEDDEDDDIDLFGSDNEEEDK	2 Phospho (ST)	79.966332@T:4,79.966331@S:19	3068.13	1023.72	3068.12	1023.71	0.0044	3	76.9	62.5	Elution from: 61.926 to 61.926 scan no 5753 cid35.00 polarity:+:MA10:m1s	61.926	0	25	K	E
EF1D_HUMAN	Elongation factor 1-delta OS=Homo sapiens GN=EEF1D PE=1 SV=5	KPATPAEDDEDDDIDLFGSDNEEEDKEAAQLREER	2 Label:13C(6)15N(4) (R);2 Label:2H(4) (K);2 Phospho (ST)	10.008269@R:32,10.008269@R:35,4.025107@K:1,4.025107@K:26,79.966332@T:4,79.966331@S:19	4178.74	1045.69	4178.74	1045.69	0.0058	4	68.3	55.8	Elution from: 60.565 to 60.565 scan no 5674 cid35.00 polarity:+:MA10:m1s	60.565	2	25	K	L
EF1D_HUMAN	Elongation factor 1-delta OS=Homo sapiens GN=EEF1D PE=1 SV=5	KPATPAEDDEDDDIDLFGSDNEEEDKEAAQLREER	2 Label:13C(6)15N(4) (R);2 Label:2H(4) (K);Phospho (ST)	10.008269@R:32,10.008269@R:35,4.025107@K:1,4.025107@K:26,79.966331@S:19	4098.77	1025.7	4098.77	1025.7	0.0049	4	53.2	26.8	Elution from: 58.227 to 58.227 scan no 5515 cid35.00 polarity:+:MA10:m1s	58.227	2	26	K	L
EF1D_HUMAN	Elongation factor 1-delta OS=Homo sapiens GN=EEF1D PE=1 SV=5	ATAPQTQHVSPMR	Phospho (ST)	79.966331@S:10	1502.67	501.897	1502.67	501.897	-0.0002	3	35.8	20.3	Elution from: 30.966 to 30.966 scan no 2336 cid35.00 polarity:+:MA10	30.966	0	26	R	Q
EF1D_HUMAN	Elongation factor 1-delta OS=Homo sapiens GN=EEF1D PE=1 SV=5	ATAPQTQHVSPMR	Label:13C(6)15N(4) (R);Oxidation (M);Phospho (ST)	10.008269@R:13,15.994915@M:12,79.966331@S:10	1528.67	765.344	1528.67	765.344	0.0007	2	30.4	18.9	Elution from: 26.968 to 26.968 scan no 1682 cid35.00 polarity:+:MA10	26.968	0	26	R	Q
EF1D_HUMAN	Elongation factor 1-delta OS=Homo sapiens GN=EEF1D PE=1 SV=5	ATAPQTQHVSPMR	Oxidation (M);Phospho (ST)	15.994915@M:12,79.966331@S:10	1518.67	760.34	1518.66	760.34	0.0002	2	28.9	2.3	Elution from: 26.693 to 26.693 scan no 1733 cid35.00 polarity:+:MA10	26.693	0	26	R	Q
EF2_HUMAN	Elongation factor 2 OS=Homo sapiens GN=EEF2 PE=1 SV=4	AGETRFTDTRK	Phospho (ST)	79.966332@T:7	1360.61	454.545	1360.61	454.545	0.0004	3	36.4	15	Elution from: 26.433 to 26.433 scan no 1617 cid35.00 polarity:+:MA10	26.433	2	26	R	D
EF2_HUMAN	Elongation factor 2 OS=Homo sapiens GN=EEF2 PE=1 SV=4	AGETRFTDTR	2 Label:13C(6)15N(4) (R);Phospho (ST)	10.008269@R:5,10.008269@R:10,79.966332@T:7	1252.54	418.519	1252.54	418.519	0.0002	3	24.8	3.9	Elution from: 29.849 to 29.849 scan no 2063 cid35.00 polarity:+:MA10	29.849	1	26	R	K
EF2K_HUMAN	Eukaryotic elongation factor 2 kinase OS=Homo sapiens GN=EEF2K PE=1 SV=2	DHDHLDNHRESENSGDSGYPSEK	Phospho (ST)	79.966331@S:21	2704.04	677.018	2704.04	677.018	0.0015	4	38.6	20.5	Elution from: 28.080 to 28.080 scan no 1829 cid35.00 polarity:+:MA10:m1s	28.08	1	26	R	R
EF2K_HUMAN	Eukaryotic elongation factor 2 kinase OS=Homo sapiens GN=EEF2K PE=1 SV=2	KYESDEDSLGSSGR	2 Phospho (ST)	79.966331@S:4,79.966331@S:8	1688.6	845.306	1688.6	845.306	0.0011	2	31.7	9	Elution from: 33.272 to 33.272 scan no 2529 cid35.00 polarity:+:MA10	33.272	1	26	R	V
EFR3A_HUMAN	Protein EFR3 homolog A OS=Homo sapiens GN=EFR3A PE=1 SV=2	LSVPYVPQVTDEDRLSR	Phospho (ST)	79.966332@T:10	2052.99	685.337	2052.99	685.337	0.0021	3	31.9	0.1	Elution from: 60.924 to 60.924 scan no 5740 cid35.00 polarity:+:MA10:m1s	60.924	1	26	R	R
EHBP1_HUMAN	EH domain-binding protein 1 OS=Homo sapiens GN=EHBP1 PE=1 SV=3	DLSTSPKPSPIPSPVLGR	Label:13C(6)15N(4) (R);Label:2H(4) (K);2 Phospho (ST)	10.008269@R:18,4.025107@K:7,79.966332@T:4,79.966331@S:13	2020.98	674.667	2020.98	674.668	-0.0011	3	31.9	4.3	Elution from: 58.466 to 58.466 scan no 5533 cid35.00 polarity:+:MA10:m1s	58.466	0	26	K	K
EIF2A_HUMAN	Eukaryotic translation initiation factor 2A OS=Homo sapiens GN=EIF2A PE=1 SV=3	SDKSPDLAPTPAPQSTPR	Label:13C(6)15N(4) (R);Label:2H(4) (K);Phospho (ST)	10.008269@R:18,4.025107@K:3,79.966331@S:4	1957.93	653.652	1957.93	653.651	0.0013	3	69.2	0	Elution from: 37.344 to 37.344 scan no 3090 cid35.00 polarity:+:MA10:m1s	37.344	1	25	R	N
EIF2A_HUMAN	Eukaryotic translation initiation factor 2A OS=Homo sapiens GN=EIF2A PE=1 SV=3	SDKSPDLAPTPAPQSTPR	Phospho (ST)	79.966331@S:4	1943.9	648.974	1943.9	648.974	0.0019	3	60.7	8.7	Elution from: 37.388 to 37.388 scan no 3096 cid35.00 polarity:+:MA10:m1s	37.388	1	25	R	N
EIF2A_HUMAN	Eukaryotic translation initiation factor 2A OS=Homo sapiens GN=EIF2A PE=1 SV=3	SDKSPDLAPTPAPQSTPR	Phospho (ST)	79.966332@T:10	1943.9	648.974	1943.9	648.974	0	3	48.1	4.9	Elution from: 37.362 to 37.362 scan no 3123 cid35.00 polarity:+:MA10	37.362	1	26	R	N
EIF3B_HUMAN	Eukaryotic translation initiation factor 3 subunit B OS=Homo sapiens GN=EIF3B PE=1 SV=3	SDSRAQAVSEDAGGNEGR	2 Label:13C(6)15N(4) (R);Phospho (ST)	10.008269@R:4,10.008269@R:18,79.966331@S:3	1904.78	635.934	1904.78	635.933	0.0032	3	61.5	0	Elution from: 30.196 to 30.196 scan no 2217 cid35.00 polarity:+:MA10:m1s	30.196	1	26	R	A
EIF3B_HUMAN	Eukaryotic translation initiation factor 3 subunit B OS=Homo sapiens GN=EIF3B PE=1 SV=3	SDSRAQAVSEDAGGNEGR	Phospho (ST)	79.966331@S:1	1884.76	629.261	1884.76	629.261	0.0001	3	48.8	0.9	Elution from: 30.510 to 30.510 scan no 2158 cid35.00 polarity:+:MA10	30.51	1	26	R	A
EIF3C_HUMAN	Eukaryotic translation initiation factor 3 subunit C OS=Homo sapiens GN=EIF3C PE=1 SV=1	QPLLLSEDEEDTK	Phospho (ST)	79.966331@S:6	1595.7	798.856	1595.7	798.856	0.0013	2	74.4	59	Elution from: 52.740 to 52.740 scan no 4902 cid35.00 polarity:+:MA10	52.74	0	26	K	R
EIF3C_HUMAN	Eukaryotic translation initiation factor 3 subunit C OS=Homo sapiens GN=EIF3C PE=1 SV=1	QPLLLSEDEEDTK	Label:2H(4) (K);Phospho (ST)	4.025107@K:13,79.966331@S:6	1599.72	800.869	1599.72	800.868	0.0013	2	56.8	52	Elution from: 52.754 to 52.754 scan no 4923 cid35.00 polarity:+:MA10	52.754	0	25	K	R
ELYS_HUMAN	Protein ELYS OS=Homo sapiens GN=AHCTF1 PE=1 SV=3	DRTTSFFLNSPEK	Phospho (ST)	79.966331@S:10	1620.72	811.367	1620.72	811.367	0.0009	2	59.1	31	Elution from: 55.756 to 55.756 scan no 5318 cid35.00 polarity:+:MA10	55.756	1	25	K	E
ELYS_HUMAN	Protein ELYS OS=Homo sapiens GN=AHCTF1 PE=1 SV=3	NLSFNELYPSGTLK	Phospho (ST)	79.966331@S:3	1661.77	831.894	1661.77	831.892	0.0022	2	56.7	42.4	Elution from: 68.705 to 68.705 scan no 6379 cid35.00 polarity:+:MA10:m1s	68.705	0	26	R	L
EMD_HUMAN	Emerin OS=Homo sapiens GN=EMD PE=1 SV=1	DSAYQSITHYRPVSASR	2 Label:13C(6)15N(4) (R);Phospho (ST)	10.008269@R:11,10.008269@R:17,79.966331@S:14	2036.92	679.982	2036.92	679.981	0.0017	3	37.8	10.3	Elution from: 48.776 to 48.776 scan no 4517 cid35.00 polarity:+:MA10:m1s	48.776	0	25	R	S
EMD_HUMAN	Emerin OS=Homo sapiens GN=EMD PE=1 SV=1	DSAYQSITHYRPVSASR	Phospho (ST)	79.966331@S:14	2016.91	673.31	2016.91	673.309	0.0033	3	33.4	3.7	Elution from: 48.906 to 48.906 scan no 4598 cid35.00 polarity:+:MA10:m1s	48.906	0	26	R	S
EMD_HUMAN	Emerin OS=Homo sapiens GN=EMD PE=1 SV=1	DSAYQSITHYRPVSASR	Phospho (ST)	79.966331@S:16	2016.91	673.309	2016.91	673.309	0.0011	3	30.3	0.3	Elution from: 48.724 to 48.724 scan no 4512 cid35.00 polarity:+:MA10	48.724	0	25	R	S
EMSY_HUMAN	Protein EMSY OS=Homo sapiens GN=EMSY PE=1 SV=2	TNSSSSSPVVLK	Phospho (ST)	79.966331@S:3	1284.6	643.306	1284.6	643.305	0.0018	2	25.3	2.7	Elution from: 38.299 to 38.299 scan no 3393 cid35.00 polarity:+:MA10	38.299	0	26	R	E
EP300_HUMAN	Histone acetyltransferase p300 OS=Homo sapiens GN=EP300 PE=1 SV=2	TEIKEEEDQPSTSATQSSPAPGQSK	Phospho (ST)	79.966331@S:18	2711.18	904.735	2711.18	904.734	0.0013	3	61.1	5.7	Elution from: 32.914 to 32.914 scan no 2592 cid35.00 polarity:+:MA10:m1s	32.914	1	26	K	K
EP400_HUMAN	E1A-binding protein p400 OS=Homo sapiens GN=EP400 PE=1 SV=4	GKKEEQSR	Label:13C(6)15N(4) (R);Label:2H(4) (K);Phospho (ST)	10.008269@R:8,4.025107@K:2,79.966331@S:7	1054.5	352.507	1054.5	352.507	0.0019	3	26.5	4.3	Elution from: 25.033 to 25.033 scan no 1450 cid35.00 polarity:+:MA10:m1s	25.033	2	26	R	L
ERCC5_HUMAN	DNA repair protein complementing XP-G cells OS=Homo sapiens GN=ERCC5 PE=1 SV=3	FDSSLLSSDDETK	2 Phospho (ST)	79.966331@S:7,79.966331@S:8	1602.58	802.295	1602.57	802.294	0.0016	2	59	33.3	Elution from: 54.741 to 54.741 scan no 5192 cid35.00 polarity:+:MA10	54.741	0	26	K	C
ERCC5_HUMAN	DNA repair protein complementing XP-G cells OS=Homo sapiens GN=ERCC5 PE=1 SV=3	FDSSLLSSDDETK	Label:2H(4) (K);2 Phospho (ST)	4.025107@K:13,79.966331@S:7,79.966331@S:8	1606.6	804.308	1606.6	804.307	0.0018	2	34.1	24.2	Elution from: 55.280 to 55.280 scan no 5232 cid35.00 polarity:+:MA10	55.28	0	25	K	C
ES8L1_HUMAN	Epidermal growth factor receptor kinase substrate 8-like protein 1 OS=Homo sapiens GN=EPS8L1 PE=1 SV=3	DRSPAAETPPLQR	2 Label:13C(6)15N(4) (R);2 Phospho (ST)	10.008269@R:2,10.008269@R:13,79.966331@S:3,79.966332@T:8	1616.69	539.903	1616.69	539.903	0	3	27.3	15.7	Elution from: 35.817 to 35.817 scan no 3013 cid35.00 polarity:+:MA10	35.817	1	25	R	R
ESYT2_HUMAN	Extended synaptotagmin-2 OS=Homo sapiens GN=ESYT2 PE=1 SV=1	EPTPSIASDISLPIATQELR	2 Phospho (ST)	79.966331@S:5,79.966331@S:11	2297.06	766.694	2297.06	766.694	0.0022	3	46.6	2.1	Elution from: 77.833 to 77.833 scan no 7045 cid35.00 polarity:+:MA10	77.833	0	26	K	Q
ESYT2_HUMAN	Extended synaptotagmin-2 OS=Homo sapiens GN=ESYT2 PE=1 SV=1	EPTPSIASDISLPIATQELR	2 Phospho (ST)	79.966331@S:8,79.966331@S:11	2297.06	766.694	2297.06	766.694	0.0022	3	43.7	6.5	Elution from: 77.695 to 77.695 scan no 7045 cid35.00 polarity:+:MA10:m1s	77.695	0	26	K	Q
ESYT2_HUMAN	Extended synaptotagmin-2 OS=Homo sapiens GN=ESYT2 PE=1 SV=1	EPTPSIASDISLPIATQELR	3 Phospho (ST)	79.966332@T:3,79.966331@S:5,79.966331@S:8	2377.03	793.35	2377.03	793.349	0.0017	3	32.2	7.1	Elution from: 79.586 to 79.586 scan no 7160 cid35.00 polarity:+:MA10:m1s	79.586	0	26	K	Q
EURL_HUMAN	Protein EURL homolog OS=Homo sapiens GN=EURL PE=2 SV=3	KEETISSPEANVQTQHPHYSR	Label:13C(6)15N(4) (R);2 Phospho (ST)	10.008269@R:21,79.966332@T:4,79.966331@S:7	2607.1	870.042	2607.1	870.042	0.0014	3	50.5	8.4	Elution from: 44.963 to 44.963 scan no 4120 cid35.00 polarity:+:MA10:m1s	44.963	1	25	K	E
EURL_HUMAN	Protein EURL homolog OS=Homo sapiens GN=EURL PE=2 SV=3	KEETISSPEANVQTQHPHYSR	Label:13C(6)15N(4) (R);2 Phospho (ST)	10.008269@R:21,79.966332@T:4,79.966331@S:6	2607.1	870.042	2607.1	870.042	0.001	3	38.8	1.3	Elution from: 44.852 to 44.852 scan no 4149 cid35.00 polarity:+:MA10:m1s	44.852	1	26	K	E
EURL_HUMAN	Protein EURL homolog OS=Homo sapiens GN=EURL PE=2 SV=3	KEETISSPEANVQTQHPHYSR	Label:13C(6)15N(4) (R);2 Phospho (ST)	10.008269@R:21,79.966331@S:6,79.966331@S:7	2607.1	870.042	2607.1	870.042	0.0012	3	36.8	1	Elution from: 45.167 to 45.167 scan no 4118 cid35.00 polarity:+:MA10:m1s	45.167	1	25	K	E
EXOS9_HUMAN	Exosome complex component RRP45 OS=Homo sapiens GN=EXOSC9 PE=1 SV=3	APIDTSDVEEK	Label:2H(4) (K);Phospho (ST)	4.025107@K:11,79.966331@S:6	1286.56	644.287	1286.56	644.286	0.0013	2	71	14.9	Elution from: 40.136 to 40.136 scan no 3514 cid35.00 polarity:+:MA10	40.136	0	25	K	A
EXOS9_HUMAN	Exosome complex component RRP45 OS=Homo sapiens GN=EXOSC9 PE=1 SV=3	APIDTSDVEEK	Phospho (ST)	79.966331@S:6	1282.53	642.274	1282.53	642.274	0.0013	2	57.3	2.6	Elution from: 40.122 to 40.122 scan no 3640 cid35.00 polarity:+:MA10	40.122	0	26	K	A
F104A_HUMAN	Protein FAM104A OS=Homo sapiens GN=FAM104A PE=1 SV=2	MGGRGADAGSSGGTGPTEGYSPPAASTR	Label:13C(6)15N(4) (R);2 Phospho (ST)	10.008269@R:4,79.966331@S:26,79.966332@T:27	2721.08	908.034	2721.08	908.033	0.0048	3	31.7	3.3	Elution from: 44.552 to 44.552 scan no 4126 cid35.00 polarity:+:MA10:m1s	44.552	1	25	-	A
F10A1_HUMAN	Hsc70-interacting protein OS=Homo sapiens GN=ST13 PE=1 SV=2	KVEEDLKADEPSSEESDLEIDK	3 Phospho (ST)	79.966331@S:12,79.966331@S:13,79.966331@S:16	2744.07	915.697	2744.06	915.695	0.0036	3	68	52.7	Elution from: 51.671 to 51.671 scan no 4795 cid35.00 polarity:+:MA10:m1s	51.671	2	25	K	E
F10A1_HUMAN	Hsc70-interacting protein OS=Homo sapiens GN=ST13 PE=1 SV=2	KVEEDLKADEPSSEESDLEIDK	3 Label:2H(4) (K);2 Phospho (ST)	4.025107@K:1,4.025107@K:7,4.025107@K:22,79.966331@S:13,79.966331@S:16	2676.18	893.066	2676.17	893.065	0.0031	3	66.1	10.4	Elution from: 49.659 to 49.659 scan no 4627 cid35.00 polarity:+:MA10:m1s	49.659	2	26	K	E
F10A1_HUMAN	Hsc70-interacting protein OS=Homo sapiens GN=ST13 PE=1 SV=2	KVEEDLKADEPSSEESDLEIDK	2 Phospho (ST)	79.966331@S:13,79.966331@S:16	2664.1	889.041	2664.1	889.04	0.0025	3	62.7	1.1	Elution from: 49.694 to 49.694 scan no 4631 cid35.00 polarity:+:MA10:m1s	49.694	2	26	K	E
F10A1_HUMAN	Hsc70-interacting protein OS=Homo sapiens GN=ST13 PE=1 SV=2	KVEEDLKADEPSSEESDLEIDK	3 Label:2H(4) (K);2 Phospho (ST)	4.025107@K:1,4.025107@K:7,4.025107@K:22,79.966331@S:12,79.966331@S:13	2676.17	893.065	2676.17	893.065	0.0011	3	59.2	11.1	Elution from: 49.578 to 49.578 scan no 4573 cid35.00 polarity:+:MA10:m1s	49.578	2	25	K	E
F10A1_HUMAN	Hsc70-interacting protein OS=Homo sapiens GN=ST13 PE=1 SV=2	KVEEDLKADEPSSEESDLEIDK	3 Label:2H(4) (K);3 Phospho (ST)	4.025107@K:1,4.025107@K:7,4.025107@K:22,79.966331@S:12,79.966331@S:13,79.966331@S:16	2756.14	919.722	2756.14	919.72	0.004	3	56	44.4	Elution from: 51.773 to 51.773 scan no 4797 cid35.00 polarity:+:MA10:m1s	51.773	2	26	K	E
F10A1_HUMAN	Hsc70-interacting protein OS=Homo sapiens GN=ST13 PE=1 SV=2	ADEPSSEESDLEIDK	3 Phospho (ST)	79.966331@S:5,79.966331@S:6,79.966331@S:9	1902.61	952.312	1902.61	952.312	0.0005	2	35.2	31.4	Elution from: 52.297 to 52.297 scan no 4901 cid35.00 polarity:+:MA10:m1s	52.297	0	26	K	E
F122A_HUMAN	Protein FAM122A OS=Homo sapiens GN=FAM122A PE=1 SV=1	RIDFIPVSPAPSPTR	2 Phospho (ST)	79.966331@S:8,79.966331@S:12	1811.84	604.953	1811.84	604.953	0.0011	3	47.3	0.9	Elution from: 62.946 to 62.946 scan no 5889 cid35.00 polarity:+:MA10:m1s	62.946	1	26	K	G
F122B_HUMAN	Protein FAM122B OS=Homo sapiens GN=FAM122B PE=1 SV=2	RIDFTPVSPAPSPTR	2 Phospho (ST)	79.966331@S:8,79.966331@S:12	1799.8	900.909	1799.8	900.908	0.0016	2	54.8	4.5	Elution from: 52.218 to 52.218 scan no 4844 cid35.00 polarity:+:MA10:m1s	52.218	1	26	K	G
F122B_HUMAN	Protein FAM122B OS=Homo sapiens GN=FAM122B PE=1 SV=2	RIDFTPVSPAPSPTR	2 Label:13C(6)15N(4) (R);2 Phospho (ST)	10.008269@R:1,10.008269@R:15,79.966331@S:8,79.966331@S:12	1819.82	607.614	1819.82	607.613	0.0021	3	31.2	5.1	Elution from: 52.501 to 52.501 scan no 4978 cid35.00 polarity:+:MA10	52.501	1	26	K	G
F134A_HUMAN	Protein FAM134A OS=Homo sapiens GN=FAM134A PE=1 SV=3	QALDSEEEEEDVAAK	Phospho (ST)	79.966331@S:5	1741.69	871.854	1741.69	871.854	0.0006	2	71.8	65.9	Elution from: 41.726 to 41.726 scan no 3845 cid35.00 polarity:+:MA10	41.726	0	26	R	E
F134A_HUMAN	Protein FAM134A OS=Homo sapiens GN=FAM134A PE=1 SV=3	QALDSEEEEEDVAAK	Label:2H(4) (K);Phospho (ST)	4.025107@K:15,79.966331@S:5	1745.72	873.867	1745.72	873.866	0.0016	2	68.7	62.7	Elution from: 41.769 to 41.769 scan no 3725 cid35.00 polarity:+:MA10	41.769	0	25	R	E
F134C_HUMAN	Protein FAM134C OS=Homo sapiens GN=FAM134C PE=1 SV=1	AMDNHSDSEEELAAFCPQLDDSTVAR	Carbamidomethyl (C);Label:13C(6)15N(4) (R);Oxidation (M);2 Phospho (ST)	57.021465@C:16,10.008269@R:26,15.994915@M:2,79.966331@S:6,79.966331@S:8	3093.17	1032.06	3093.16	1032.06	0.0032	3	84.8	68.1	Elution from: 66.638 to 66.638 scan no 6207 cid35.00 polarity:+:MA10:m1s	66.638	0	26	R	E
F134C_HUMAN	Protein FAM134C OS=Homo sapiens GN=FAM134C PE=1 SV=1	AMDNHSDSEEELAAFCPQLDDSTVAR	Carbamidomethyl (C);Oxidation (M);2 Phospho (ST)	57.021465@C:16,15.994915@M:2,79.966331@S:6,79.966331@S:8	3083.16	1028.73	3083.16	1028.73	0.0043	3	69.3	63.8	Elution from: 66.231 to 66.231 scan no 6282 cid35.00 polarity:+:MA10:m1s	66.231	0	26	R	E
F134C_HUMAN	Protein FAM134C OS=Homo sapiens GN=FAM134C PE=1 SV=1	GQTPLTEGSEDLDGHSDPEESFAR	Label:13C(6)15N(4) (R);3 Phospho (ST)	10.008269@R:24,79.966332@T:6,79.966331@S:9,79.966331@S:16	2823.02	942.015	2823.02	942.015	0.0012	3	58	15.9	Elution from: 59.928 to 59.928 scan no 5601 cid35.00 polarity:+:MA10:m1s	59.928	0	26	R	D
F134C_HUMAN	Protein FAM134C OS=Homo sapiens GN=FAM134C PE=1 SV=1	AMDNHSDSEEELAAFCPQLDDSTVAR	Carbamidomethyl (C);Label:13C(6)15N(4) (R);2 Phospho (ST)	57.021465@C:16,10.008269@R:26,79.966331@S:6,79.966331@S:8	3077.18	1026.73	3077.17	1026.73	0.0062	3	55.4	40.7	Elution from: 68.017 to 68.017 scan no 6303 cid35.00 polarity:+:MA10:m1s	68.017	0	25	R	E
F134C_HUMAN	Protein FAM134C OS=Homo sapiens GN=FAM134C PE=1 SV=1	SPSSDLDTDAEGDDFELLDQSELSQLDPASSR	Label:13C(6)15N(4) (R);Phospho (ST)	10.008269@R:32,79.966331@S:1	3528.49	1177.17	3528.48	1177.17	0.0044	3	51.5	4.8	Elution from: 82.756 to 82.756 scan no 7408 cid35.00 polarity:+:MA10:m1s	82.756	0	25	R	S
F134C_HUMAN	Protein FAM134C OS=Homo sapiens GN=FAM134C PE=1 SV=1	GQTPLTEGSEDLDGHSDPEESFAR	3 Phospho (ST)	79.966332@T:6,79.966331@S:9,79.966331@S:16	2813.02	938.679	2813.01	938.679	0.0017	3	35.5	9.4	Elution from: 59.293 to 59.293 scan no 5602 cid35.00 polarity:+:MA10:m1s	59.293	0	26	R	D
F167B_HUMAN	Protein FAM167B OS=Homo sapiens GN=FAM167B PE=2 SV=2	HLGLTRMNISARR	Label:13C(6)15N(4) (R);Oxidation (M);2 Phospho (ST)	10.008269@R:13,15.994915@M:7,79.966332@T:5,79.966331@S:10	1709.78	428.453	1709.78	428.453	0.0013	4	29.9	0	Elution from: 20.602 to 20.602 scan no 977 cid35.00 polarity:+:MA10	20.602	2	26	R	F
F169A_HUMAN	Protein FAM169A OS=Homo sapiens GN=FAM169A PE=1 SV=2	AVDSSSEEIEVEVPVVDRR	2 Label:13C(6)15N(4) (R);2 Phospho (ST)	10.008269@R:18,10.008269@R:19,79.966331@S:4,79.966331@S:5	2294	765.674	2294	765.673	0.0015	3	54.5	9.9	Elution from: 60.532 to 60.532 scan no 5792 cid35.00 polarity:+:MA10:m1s	60.532	1	26	K	N
F186A_HUMAN	Protein FAM186A OS=Homo sapiens GN=FAM186A PE=2 SV=3	SKASLPTGQSIISRLSPSLR	Label:13C(6)15N(4) (R);4 Phospho (ST)	10.008269@R:20,79.966331@S:10,79.966331@S:13,79.966331@S:16,79.966331@S:18	2427.06	607.772	2427.06	607.773	-0.0055	4	29.6	2	Elution from: 34.700 to 34.700 scan no 2850 cid35.00 polarity:+:MA10	34.7	2	26	K	L
F189B_HUMAN	Protein FAM189B OS=Homo sapiens GN=FAM189B PE=1 SV=2	MMPSPSDSSR	Label:13C(6)15N(4) (R);Phospho (ST)	10.008269@R:10,79.966331@S:6	1183.43	592.72	1183.43	592.721	-0.0027	2	20.2	7.5	Elution from: 36.362 to 36.362 scan no 3002 cid35.00 polarity:+:MA10	36.362	0	25	-	S
FA21A_HUMAN	WASH complex subunit FAM21A OS=Homo sapiens GN=FAM21A PE=1 SV=3	GLFSDEEDSEDLFSSQSASK	Phospho (ST)	79.966331@S:4	2256.9	1129.46	2256.89	1129.45	0.0032	2	113	44.5	Elution from: 73.151 to 73.151 scan no 6741 cid35.00 polarity:+:MA10:m1s	73.151	0	25	K	L
FA21A_HUMAN	WASH complex subunit FAM21A OS=Homo sapiens GN=FAM21A PE=1 SV=3	TPSDDEEDNLFAPPK	Phospho (ST)	79.966331@S:3	1753.71	877.862	1753.71	877.861	0.0008	2	74	19.2	Elution from: 58.309 to 58.309 scan no 5451 cid35.00 polarity:+:MA10	58.309	0	25	R	L
FA21A_HUMAN	WASH complex subunit FAM21A OS=Homo sapiens GN=FAM21A PE=1 SV=3	TPSDDEEDNLFAPPK	Label:2H(4) (K);Phospho (ST)	4.025107@K:15,79.966331@S:3	1757.73	879.874	1757.73	879.874	0.0008	2	72	11	Elution from: 58.521 to 58.521 scan no 5469 cid35.00 polarity:+:MA10:m1s	58.521	0	25	R	L
FA21A_HUMAN	WASH complex subunit FAM21A OS=Homo sapiens GN=FAM21A PE=1 SV=3	AGNSDSEEDDANGRVELILEPK	2 Phospho (ST)	79.966331@S:4,79.966331@S:6	2517.03	840.018	2517.03	840.018	0.0026	3	46.9	26.6	Elution from: 63.993 to 63.993 scan no 6011 cid35.00 polarity:+:MA10:m1s	63.993	1	26	K	D
FA21C_HUMAN	WASH complex subunit FAM21C OS=Homo sapiens GN=FAM21C PE=1 SV=3	GLFSDEEDSEDLFSSQSASNLK	Phospho (ST)	79.966331@S:4	2484.02	829.015	2484.02	829.015	0.0026	3	73.2	22.8	Elution from: 75.713 to 75.713 scan no 6873 cid35.00 polarity:+:MA10:m1s	75.713	0	26	K	G
FA40A_HUMAN	Protein FAM40A OS=Homo sapiens GN=FAM40A PE=1 SV=1	AASPPASASDLIEQQQK	Phospho (ST)	79.966331@S:3	1819.84	910.925	1819.84	910.925	0.0007	2	76.8	34.1	Elution from: 50.222 to 50.222 scan no 4806 cid35.00 polarity:+:MA10:m1s	50.222	0	26	R	R
FA40A_HUMAN	Protein FAM40A OS=Homo sapiens GN=FAM40A PE=1 SV=1	AASPPASASDLIEQQQK	Label:2H(4) (K);Phospho (ST)	4.025107@K:17,79.966331@S:3	1823.86	912.938	1823.86	912.937	0.0011	2	73.7	24.2	Elution from: 50.300 to 50.300 scan no 4639 cid35.00 polarity:+:MA10	50.3	0	26	R	R
FA54B_HUMAN	Protein FAM54B OS=Homo sapiens GN=FAM54B PE=1 SV=2	NASVPNLR	Label:13C(6)15N(4) (R);Phospho (ST)	10.008269@R:8,79.966331@S:3	959.447	480.731	959.447	480.731	0.0001	2	38.3	27.3	Elution from: 39.291 to 39.291 scan no 3342 cid35.00 polarity:+:MA10	39.291	0	25	R	G
FA76B_HUMAN	Protein FAM76B OS=Homo sapiens GN=FAM76B PE=1 SV=3	ISNLSPEEEQGLWK	Phospho (ST)	79.966331@S:5	1708.77	855.394	1708.77	855.393	0.0034	2	53	19.2	Elution from: 60.024 to 60.024 scan no 5662 cid35.00 polarity:+:MA10:m1s	60.024	0	26	K	Q
FA83H_HUMAN	Protein FAM83H OS=Homo sapiens GN=FAM83H PE=1 SV=3	RGSPTTGFIEQK	Label:13C(6)15N(4) (R);Label:2H(4) (K);Phospho (ST)	10.008269@R:1,4.025107@K:12,79.966332@T:5	1413.68	472.235	1413.68	472.235	-0.0007	3	47.3	8.3	Elution from: 38.638 to 38.638 scan no 3325 cid35.00 polarity:+:MA10	38.638	1	25	R	G
FA83H_HUMAN	Protein FAM83H OS=Homo sapiens GN=FAM83H PE=1 SV=3	LDYVPSSASREVR	2 Label:13C(6)15N(4) (R);2 Phospho (ST)	10.008269@R:10,10.008269@R:13,79.966331@S:6,79.966331@S:7	1657.7	553.574	1657.7	553.575	-0.0003	3	28.4	7.7	Elution from: 48.529 to 48.529 scan no 4489 cid35.00 polarity:+:MA10	48.529	1	25	R	H
FA83H_HUMAN	Protein FAM83H OS=Homo sapiens GN=FAM83H PE=1 SV=3	KGSPTPGFSTR	Label:13C(6)15N(4) (R);Label:2H(4) (K);Phospho (ST)	10.008269@R:11,4.025107@K:1,79.966331@S:3	1227.58	614.799	1227.58	614.799	0.0007	2	26.5	11.4	Elution from: 31.599 to 31.599 scan no 2426 cid35.00 polarity:+:MA10	31.599	1	26	R	R
FA83H_HUMAN	Protein FAM83H OS=Homo sapiens GN=FAM83H PE=1 SV=3	HGSDPAFAPGPR	Label:13C(6)15N(4) (R);Phospho (ST)	10.008269@R:12,79.966331@S:3	1297.55	433.523	1297.55	433.523	0.0002	3	24.7	14.7	Elution from: 35.227 to 35.227 scan no 2948 cid35.00 polarity:+:MA10	35.227	0	26	R	G
FACD2_HUMAN	Fanconi anemia group D2 protein OS=Homo sapiens GN=FANCD2 PE=1 SV=1	DASSSTFPTLTR	Label:13C(6)15N(4) (R);2 Phospho (ST)	10.008269@R:12,79.966332@T:6,79.966332@T:11	1451.56	726.789	1451.56	726.788	0.003	2	25.6	0	Elution from: 32.010 to 32.010 scan no 2462 cid35.00 polarity:+:MA10:m1s	32.01	0	26	K	H
FACD2_HUMAN	Fanconi anemia group D2 protein OS=Homo sapiens GN=FANCD2 PE=1 SV=1	DASSSTFPTLTR	Label:13C(6)15N(4) (R);4 Phospho (ST)	10.008269@R:12,79.966331@S:3,79.966331@S:4,79.966332@T:9,79.966332@T:11	1611.5	403.882	1611.49	403.881	0.0047	4	21.3	0.5	Elution from: 41.375 to 41.375 scan no 3695 cid35.00 polarity:+:MA10	41.375	0	25	K	H
FARP1_HUMAN	FERM, RhoGEF and pleckstrin domain-containing protein 1 OS=Homo sapiens GN=FARP1 PE=1 SV=1	VSAGEPGSHPSPAPRRSPAGNK	2 Phospho (ST)	79.966331@S:11,79.966331@S:17	2315.02	772.681	2315.02	772.681	0.001	3	52.5	8.2	Elution from: 26.692 to 26.692 scan no 1756 cid35.00 polarity:+:MA10:m1s	26.692	2	26	K	Q
FARP1_HUMAN	FERM, RhoGEF and pleckstrin domain-containing protein 1 OS=Homo sapiens GN=FARP1 PE=1 SV=1	LGAPENSGISTLER	Phospho (ST)	79.966331@S:10	1522.71	762.36	1522.7	762.359	0.003	2	49.3	2.2	Elution from: 47.528 to 47.528 scan no 4525 cid35.00 polarity:+:MA10:m1s	47.528	0	26	R	G
FARP1_HUMAN	FERM, RhoGEF and pleckstrin domain-containing protein 1 OS=Homo sapiens GN=FARP1 PE=1 SV=1	LGAPENSGISTLER	Label:13C(6)15N(4) (R);Phospho (ST)	10.008269@R:14,79.966332@T:11	1532.71	767.363	1532.71	767.363	0.0009	2	29	0	Elution from: 47.653 to 47.653 scan no 4354 cid35.00 polarity:+:MA10	47.653	0	26	R	G
FBP1L_HUMAN	Formin-binding protein 1-like OS=Homo sapiens GN=FNBP1L PE=1 SV=2	TISDGTISASK	Label:2H(4) (K);Phospho (ST)	4.025107@K:11,79.966331@S:3	1162.54	582.278	1162.54	582.278	0	2	29	11.5	Elution from: 37.788 to 37.788 scan no 3182 cid35.00 polarity:+:MA10	37.788	0	26	R	Q
FCHO2_HUMAN	FCH domain only protein 2 OS=Homo sapiens GN=FCHO2 PE=1 SV=2	NLSNEELTK	Label:2H(4) (K);Phospho (ST)	4.025107@K:9,79.966331@S:3	1130.52	566.266	1130.52	566.265	0.0008	2	34.8	18.4	Elution from: 38.631 to 38.631 scan no 3410 cid35.00 polarity:+:MA10	38.631	0	25	R	S
FCHO2_HUMAN	FCH domain only protein 2 OS=Homo sapiens GN=FCHO2 PE=1 SV=2	NLSNEELTK	Phospho (ST)	79.966331@S:3	1126.49	564.254	1126.49	564.253	0.002	2	27.8	22.3	Elution from: 38.331 to 38.331 scan no 3250 cid35.00 polarity:+:MA10	38.331	0	26	R	S
FGFP3_HUMAN	Fibroblast growth factor-binding protein 3 OS=Homo sapiens GN=FGFBP3 PE=1 SV=1	REKGAASNVAEPVPGPTGGSSGR	3 Phospho (ST)	79.966332@T:17,79.966331@S:20,79.966331@S:21	2419.99	606.005	2419.99	606.005	-0.0036	4	35.8	23	Elution from: 47.573 to 47.573 scan no 4440 cid35.00 polarity:+:MA10	47.573	2	25	R	F
FIP1_HUMAN	Pre-mRNA 3'-end-processing factor FIP1 OS=Homo sapiens GN=FIP1L1 PE=1 SV=1	DHSPTPSVFNSDEERYR	2 Phospho (ST)	79.966331@S:3,79.966331@S:11	2194.84	732.62	2194.84	732.619	0.0024	3	49.1	8.7	Elution from: 48.943 to 48.943 scan no 4627 cid35.00 polarity:+:MA10:m1s	48.943	1	26	R	Y
FIP1_HUMAN	Pre-mRNA 3'-end-processing factor FIP1 OS=Homo sapiens GN=FIP1L1 PE=1 SV=1	DHSPTPSVFNSDEER	Label:13C(6)15N(4) (R);Phospho (ST)	10.008269@R:15,79.966332@T:5	1805.71	602.912	1805.71	602.912	0.0012	3	48.3	0	Elution from: 43.878 to 43.878 scan no 3947 cid35.00 polarity:+:MA10	43.878	0	26	R	Y
FIP1_HUMAN	Pre-mRNA 3'-end-processing factor FIP1 OS=Homo sapiens GN=FIP1L1 PE=1 SV=1	DHSPTPSVFNSDEER	Label:13C(6)15N(4) (R);Phospho (ST)	10.008269@R:15,79.966331@S:3	1805.71	602.912	1805.71	602.912	0.0004	3	43.1	0.5	Elution from: 44.237 to 44.237 scan no 4086 cid35.00 polarity:+:MA10	44.237	0	25	R	Y
FIP1_HUMAN	Pre-mRNA 3'-end-processing factor FIP1 OS=Homo sapiens GN=FIP1L1 PE=1 SV=1	DHSPTPSVFNSDEER	Phospho (ST)	79.966331@S:7	1795.71	599.576	1795.7	599.576	0.0012	3	41.4	1.7	Elution from: 44.251 to 44.251 scan no 4088 cid35.00 polarity:+:MA10:m1s	44.251	0	25	R	Y
FIP1_HUMAN	Pre-mRNA 3'-end-processing factor FIP1 OS=Homo sapiens GN=FIP1L1 PE=1 SV=1	DHSPTPSVFNSDEER	Phospho (ST)	79.966332@T:5	1795.71	599.576	1795.7	599.576	0.0005	3	38.3	0.8	Elution from: 44.009 to 44.009 scan no 4000 cid35.00 polarity:+:MA10	44.009	0	25	R	Y
FIP1_HUMAN	Pre-mRNA 3'-end-processing factor FIP1 OS=Homo sapiens GN=FIP1L1 PE=1 SV=1	ERDHSPTPSVFNSDEERYR	2 Phospho (ST)	79.966331@S:5,79.966331@S:13	2479.98	621.002	2479.98	621.002	0.0007	4	37.7	7.5	Elution from: 44.688 to 44.688 scan no 4166 cid35.00 polarity:+:MA10:m1s	44.688	2	26	R	Y
FIP1_HUMAN	Pre-mRNA 3'-end-processing factor FIP1 OS=Homo sapiens GN=FIP1L1 PE=1 SV=1	RHESEEGDSHRR	Phospho (ST)	79.966331@S:4	1573.64	525.553	1573.64	525.553	0.0004	3	31.4	15.7	Elution from: 20.262 to 20.262 scan no 936 cid35.00 polarity:+:MA10	20.262	2	26	R	H
FKB15_HUMAN	FK506-binding protein 15 OS=Homo sapiens GN=FKBP15 PE=1 SV=2	SSLSGDEEDELFK	Label:2H(4) (K);2 Phospho (ST)	4.025107@K:13,79.966331@S:2,79.966331@S:4	1618.6	810.308	1618.6	810.307	0.0028	2	60.3	0	Elution from: 64.302 to 64.302 scan no 6011 cid35.00 polarity:+:MA10	64.302	0	26	R	G
FKB15_HUMAN	FK506-binding protein 15 OS=Homo sapiens GN=FKBP15 PE=1 SV=2	SSLSGDEEDELFK	Label:2H(4) (K);2 Phospho (ST)	4.025107@K:13,79.966331@S:1,79.966331@S:4	1618.6	810.308	1618.6	810.307	0.0017	2	55.6	3.2	Elution from: 64.062 to 64.062 scan no 6067 cid35.00 polarity:+:MA10	64.062	0	25	R	G
FKB15_HUMAN	FK506-binding protein 15 OS=Homo sapiens GN=FKBP15 PE=1 SV=2	SSLSGDEEDELFK	2 Phospho (ST)	79.966331@S:2,79.966331@S:4	1614.58	808.295	1614.57	808.294	0.0017	2	47.9	0	Elution from: 64.214 to 64.214 scan no 6029 cid35.00 polarity:+:MA10	64.214	0	26	R	G
FL2D_HUMAN	Pre-mRNA-splicing regulator WTAP OS=Homo sapiens GN=WTAP PE=1 SV=2	EGNTTEDDFPSSPGNGNK	Phospho (ST)	79.966331@S:12	1944.74	973.377	1944.74	973.376	0.0016	2	61.3	4.7	Elution from: 38.860 to 38.860 scan no 3438 cid35.00 polarity:+:MA10	38.86	0	25	R	S
FLII_HUMAN	Protein flightless-1 homolog OS=Homo sapiens GN=FLII PE=1 SV=2	NAEAVLQSPGLSGK	Label:2H(4) (K);Phospho (ST)	4.025107@K:14,79.966331@S:8	1453.71	727.863	1453.71	727.863	0.0007	2	40.6	1.7	Elution from: 46.511 to 46.511 scan no 4221 cid35.00 polarity:+:MA10	46.511	0	25	R	V
FLNA_HUMAN	Filamin-A OS=Homo sapiens GN=FLNA PE=1 SV=4	CSGPGLSPGMVR	Carbamidomethyl (C);Phospho (ST)	57.021465@C:1,79.966331@S:7	1296.54	649.275	1296.54	649.275	0.0001	2	45.1	21.8	Elution from: 47.608 to 47.608 scan no 4348 cid35.00 polarity:+:MA10	47.608	0	26	K	A
FLNA_HUMAN	Filamin-A OS=Homo sapiens GN=FLNA PE=1 SV=4	CSGPGLSPGMVR	Carbamidomethyl (C);Label:13C(6)15N(4) (R);Phospho (ST)	57.021465@C:1,10.008269@R:12,79.966331@S:7	1306.55	654.28	1306.54	654.279	0.0016	2	33	23.2	Elution from: 47.330 to 47.330 scan no 4458 cid35.00 polarity:+:MA10:m1s	47.33	0	26	K	A
FLNA_HUMAN	Filamin-A OS=Homo sapiens GN=FLNA PE=1 SV=4	VTGDDSMRMSHLK	2 Oxidation (M);Phospho (ST)	15.994915@M:7,15.994915@M:9,79.966331@S:10	1587.65	397.919	1587.64	397.918	0.0041	4	24.6	4.5	Elution from: 35.291 to 35.291 scan no 2854 cid35.00 polarity:+:MA10	35.291	1	25	R	V
FMNL2_HUMAN	Formin-like protein 2 OS=Homo sapiens GN=FMNL2 PE=1 SV=3	SIEDLHR	Phospho (ST)	79.966331@S:1	948.407	475.211	948.407	475.211	0	2	23.4	13.4	Elution from: 33.029 to 33.029 scan no 2632 cid35.00 polarity:+:MA10	33.029	0	26	R	G
FMO5_HUMAN	Dimethylaniline monooxygenase [N-oxide-forming] 5 OS=Homo sapiens GN=FMO5 PE=2 SV=2	KPLMTRVVERSSSMTSTMTIGK	2 Label:13C(6)15N(4) (R);Label:2H(4) (K);2 Oxidation (M);2 Phospho (ST)	10.008269@R:6,10.008269@R:10,4.025107@K:22,15.994915@M:14,15.994915@M:18,79.966332@T:17,79.966332@T:19	2655.23	664.815	2655.23	664.815	0.0036	4	34.6	10.3	Elution from: 37.711 to 37.711 scan no 3141 cid35.00 polarity:+:MA10:m1s	37.711	2	25	R	F
FNBP4_HUMAN	Formin-binding protein 4 OS=Homo sapiens GN=FNBP4 PE=1 SV=3	ATGGLCLLGAYADSDDDDNDVSEK	Carbamidomethyl (C);Phospho (ST)	57.021465@C:6,79.966331@S:14	2580.02	1291.02	2580.02	1291.02	0.0028	2	100.8	42.8	Elution from: 67.069 to 67.069 scan no 6255 cid35.00 polarity:+:MA10:m1s	67.069	0	26	K	L
FNBP4_HUMAN	Formin-binding protein 4 OS=Homo sapiens GN=FNBP4 PE=1 SV=3	ALEEGDGSVSGSSPR	Phospho (ST)	79.966331@S:13	1526.63	764.321	1526.62	764.32	0.0018	2	83.1	14.3	Elution from: 33.305 to 33.305 scan no 2543 cid35.00 polarity:+:MA10	33.305	0	26	R	S
FND3A_HUMAN	Fibronectin type-III domain-containing protein 3A OS=Homo sapiens GN=FNDC3A PE=1 SV=4	MSSPPSSPQKCPSPINEHNGLIK	Carbamidomethyl (C);Oxidation (M);3 Phospho (ST)	57.021465@C:11,15.994915@M:1,79.966331@S:3,79.966331@S:7,79.966331@S:13	2760.11	921.045	2760.11	921.044	0.0032	3	36	0	Elution from: 46.210 to 46.210 scan no 4308 cid35.00 polarity:+:MA10:m1s	46.21	1	26	K	G
FOSL2_HUMAN	Fos-related antigen 2 OS=Homo sapiens GN=FOSL2 PE=1 SV=1	SSSSGDQSSDSLNSPTLLAL	Phospho (ST)	79.966331@S:4	2044.89	1023.45	2044.88	1023.45	0.0039	2	59.1	0	Elution from: 79.068 to 79.068 scan no 7129 cid35.00 polarity:+:MA10:m1s	79.068	0	26	R	-
FR1OP_HUMAN	FGFR1 oncogene partner OS=Homo sapiens GN=FGFR1OP PE=1 SV=1	GPTTGEGALDLSDVHSPPKSPEGK	2 Phospho (ST)	79.966331@S:16,79.966331@S:20	2535.1	846.039	2535.09	846.038	0.0026	3	71.4	27.2	Elution from: 49.017 to 49.017 scan no 4507 cid35.00 polarity:+:MA10:m1s	49.017	1	25	K	T
FR1OP_HUMAN	FGFR1 oncogene partner OS=Homo sapiens GN=FGFR1OP PE=1 SV=1	GPTTGEGALDLSDVHSPPKSPEGK	2 Label:2H(4) (K);2 Phospho (ST)	4.025107@K:19,4.025107@K:24,79.966331@S:16,79.966331@S:20	2543.15	848.723	2543.14	848.722	0.0026	3	49.8	13.4	Elution from: 49.038 to 49.038 scan no 4552 cid35.00 polarity:+:MA10:m1s	49.038	1	26	K	T
FRITZ_HUMAN	WD repeat-containing and planar cell polarity effector protein fritz homolog OS=Homo sapiens GN=WDPCP PE=1 SV=2	DSLKELEELMQNSR	Oxidation (M);Phospho (ST)	15.994915@M:10,79.966331@S:2	1786.78	596.599	1786.78	596.601	-0.0044	3	45.2	0.8	Elution from: 72.107 to 72.107 scan no 6782 cid35.00 polarity:+:MA10:m1s	72.107	1	26	R	C
FUBP1_HUMAN	Far upstream element-binding protein 1 OS=Homo sapiens GN=FUBP1 PE=1 SV=3	QQAAYYAQTSPQGMPQHPPAPQGQ	Phospho (ST)	79.966331@S:10	2660.15	887.724	2660.15	887.723	0.0023	3	38.2	1.7	Elution from: 47.410 to 47.410 scan no 4468 cid35.00 polarity:+:MA10:m1s	47.41	0	26	R	-
FUBP3_HUMAN	Far upstream element-binding protein 3 OS=Homo sapiens GN=FUBP3 PE=1 SV=2	QQVAFYGQTLGQAQAHSQEQ	Phospho (ST)	79.966331@S:17	2298.01	767.01	2298.01	767.009	0.0022	3	36.4	21	Elution from: 55.082 to 55.082 scan no 5139 cid35.00 polarity:+:MA10:m1s	55.082	0	25	R	-
FUND1_HUMAN	FUN14 domain-containing protein 1 OS=Homo sapiens GN=FUNDC1 PE=1 SV=1	NPPPQDYESDDDSYEVLDLTEYAR	Phospho (ST)	79.966331@S:9	2910.18	971.067	2910.18	971.066	0.0028	3	70.8	0	Elution from: 74.388 to 74.388 scan no 6821 cid35.00 polarity:+:MA10:m1s	74.388	0	26	R	R
FUND2_HUMAN	FUN14 domain-containing protein 2 OS=Homo sapiens GN=FUNDC2 PE=1 SV=2	SNQIPTEVR	Phospho (ST)	79.966331@S:1	1122.51	562.261	1122.51	562.261	0	2	43.9	32.2	Elution from: 38.922 to 38.922 scan no 3424 cid35.00 polarity:+:MA10	38.922	0	26	K	S
FXR2_HUMAN	Fragile X mental retardation syndrome-related protein 2 OS=Homo sapiens GN=FXR2 PE=1 SV=2	TDGSISGDRQPVTVADYISR	2 Phospho (ST)	79.966332@T:1,79.966331@S:6	2295.98	766.334	2295.98	766.333	0.0016	3	52.8	6.5	Elution from: 60.947 to 60.947 scan no 5619 cid35.00 polarity:+:MA10:m1s	60.947	1	26	R	A
FXR2_HUMAN	Fragile X mental retardation syndrome-related protein 2 OS=Homo sapiens GN=FXR2 PE=1 SV=2	TDGSISGDRQPVTVADYISR	2 Label:13C(6)15N(4) (R);2 Phospho (ST)	10.008269@R:9,10.008269@R:20,79.966331@S:4,79.966331@S:6	2316	773.006	2315.99	773.005	0.0023	3	48.6	4.6	Elution from: 60.943 to 60.943 scan no 5675 cid35.00 polarity:+:MA10:m1s	60.943	1	25	R	A
FXR2_HUMAN	Fragile X mental retardation syndrome-related protein 2 OS=Homo sapiens GN=FXR2 PE=1 SV=2	TDGSISGDRQPVTVADYISR	2 Phospho (ST)	79.966331@S:4,79.966331@S:6	2295.98	766.334	2295.98	766.333	0.0024	3	47.9	12	Elution from: 60.960 to 60.960 scan no 5677 cid35.00 polarity:+:MA10:m1s	60.96	1	25	R	A
FXR2_HUMAN	Fragile X mental retardation syndrome-related protein 2 OS=Homo sapiens GN=FXR2 PE=1 SV=2	GNRTDGSISGDRQPVTVADYISR	2 Phospho (ST)	79.966331@S:7,79.966331@S:9	2623.15	656.794	2623.14	656.793	0.0028	4	39.2	8.5	Elution from: 55.626 to 55.626 scan no 5165 cid35.00 polarity:+:MA10:m1s	55.626	2	26	R	A
G3BP1_HUMAN	Ras GTPase-activating protein-binding protein 1 OS=Homo sapiens GN=G3BP1 PE=1 SV=1	SSSPAPADIAQTVQEDLR	Phospho (ST)	79.966331@S:3	1963.89	982.953	1963.89	982.952	0.0021	2	131.9	22	Elution from: 69.902 to 69.902 scan no 6620 cid35.00 polarity:+:MA10	69.902	0	26	K	T
G3BP1_HUMAN	Ras GTPase-activating protein-binding protein 1 OS=Homo sapiens GN=G3BP1 PE=1 SV=1	SSSPAPADIAQTVQEDLR	Label:13C(6)15N(4) (R);Phospho (ST)	10.008269@R:18,79.966331@S:3	1973.9	987.957	1973.9	987.956	0.0018	2	125.5	2.3	Elution from: 70.257 to 70.257 scan no 6526 cid35.00 polarity:+:MA10	70.257	0	26	K	T
G3BP1_HUMAN	Ras GTPase-activating protein-binding protein 1 OS=Homo sapiens GN=G3BP1 PE=1 SV=1	YQDEVFGGFVTEPQEESEEEVEEPEER	Phospho (ST)	79.966331@S:17	3295.33	824.839	3295.32	824.838	0.0017	4	57.5	28.3	Elution from: 70.028 to 70.028 scan no 6504 cid35.00 polarity:+:MA10:m1s	70.028	0	26	R	Q
G3BP1_HUMAN	Ras GTPase-activating protein-binding protein 1 OS=Homo sapiens GN=G3BP1 PE=1 SV=1	YQDEVFGGFVTEPQEESEEEVEEPEER	Label:13C(6)15N(4) (R);Phospho (ST)	10.008269@R:27,79.966331@S:17	3305.34	1102.79	3305.33	1102.78	0.0051	3	33.1	9.6	Elution from: 70.119 to 70.119 scan no 6594 cid35.00 polarity:+:MA10:m1s	70.119	0	25	R	Q
GALA_HUMAN	Galanin peptides OS=Homo sapiens GN=GAL PE=1 SV=3	LLDLPAAASSEDIERS	Phospho (ST)	79.966331@S:9	1765.81	883.914	1765.81	883.914	0.0008	2	102.6	13.2	Elution from: 61.935 to 61.935 scan no 5911 cid35.00 polarity:+:MA10:m1s	61.935	1	26	R	-
GBF1_HUMAN	Golgi-specific brefeldin A-resistance guanine nucleotide exchange factor 1 OS=Homo sapiens GN=GBF1 PE=1 SV=2	ADAPDAGAQSDSELPSYHQNDVSLDR	Label:13C(6)15N(4) (R);Phospho (ST)	10.008269@R:26,79.966331@S:10	2847.19	950.07	2847.19	950.069	0.0026	3	76.5	1.1	Elution from: 51.462 to 51.462 scan no 4862 cid35.00 polarity:+:MA10:m1s	51.462	0	25	R	G
GBF1_HUMAN	Golgi-specific brefeldin A-resistance guanine nucleotide exchange factor 1 OS=Homo sapiens GN=GBF1 PE=1 SV=2	ADAPDAGAQSDSELPSYHQNDVSLDR	Label:13C(6)15N(4) (R);Phospho (ST)	10.008269@R:26,79.966331@S:12	2847.19	950.07	2847.19	950.069	0.0028	3	61.9	7.4	Elution from: 50.908 to 50.908 scan no 4820 cid35.00 polarity:+:MA10:m1s	50.908	0	25	R	G
GBF1_HUMAN	Golgi-specific brefeldin A-resistance guanine nucleotide exchange factor 1 OS=Homo sapiens GN=GBF1 PE=1 SV=2	ADAPDAGAQSDSELPSYHQNDVSLDR	Phospho (ST)	79.966331@S:10	2837.18	946.734	2837.18	946.733	0.0034	3	49.7	4.1	Elution from: 51.245 to 51.245 scan no 4745 cid35.00 polarity:+:MA10:m1s	51.245	0	25	R	G
GBF1_HUMAN	Golgi-specific brefeldin A-resistance guanine nucleotide exchange factor 1 OS=Homo sapiens GN=GBF1 PE=1 SV=2	GYTSDSEVYTDHGRPGK	Label:13C(6)15N(4) (R);Label:2H(4) (K);Phospho (ST)	10.008269@R:14,4.025107@K:17,79.966331@S:4	1961.83	654.952	1961.83	654.952	0.001	3	31.4	7.3	Elution from: 38.196 to 38.196 scan no 3262 cid35.00 polarity:+:MA10	38.196	0	25	R	I
GBF1_HUMAN	Golgi-specific brefeldin A-resistance guanine nucleotide exchange factor 1 OS=Homo sapiens GN=GBF1 PE=1 SV=2	GYTSDSEVYTDHGRPGK	Phospho (ST)	79.966331@S:4	1947.8	650.274	1947.8	650.274	0.0011	3	28.2	7.6	Elution from: 37.780 to 37.780 scan no 3274 cid35.00 polarity:+:MA10:m1s	37.78	0	26	R	I
GCFC1_HUMAN	GC-rich sequence DNA-binding factor 1 OS=Homo sapiens GN=GCFC1 PE=1 SV=2	GRLVREDENDASDDEDDDEK	Phospho (ST)	79.966331@S:12	2400.92	801.314	2400.92	801.314	0.0006	3	82.6	64.3	Elution from: 30.336 to 30.336 scan no 2159 cid35.00 polarity:+:MA10:m1s	30.336	2	25	K	R
GCFC1_HUMAN	GC-rich sequence DNA-binding factor 1 OS=Homo sapiens GN=GCFC1 PE=1 SV=2	LVREDENDASDDEDDDEK	Label:13C(6)15N(4) (R);Label:2H(4) (K);Phospho (ST)	10.008269@R:3,4.025107@K:18,79.966331@S:10	2201.83	734.951	2201.83	734.951	0.0017	3	62	53.7	Elution from: 29.212 to 29.212 scan no 2066 cid35.00 polarity:+:MA10:m1s	29.212	1	25	R	R
GCFC1_HUMAN	GC-rich sequence DNA-binding factor 1 OS=Homo sapiens GN=GCFC1 PE=1 SV=2	LVREDENDASDDEDDDEK	Phospho (ST)	79.966331@S:10	2187.8	730.273	2187.8	730.273	0.0006	3	59.8	46.7	Elution from: 29.191 to 29.191 scan no 2063 cid35.00 polarity:+:MA10:m1s	29.191	1	25	R	R
GFPT1_HUMAN	Glucosamine--fructose-6-phosphate aminotransferase [isomerizing] 1 OS=Homo sapiens GN=GFPT1 PE=1 SV=3	VDSTTCLFPVEEK	Carbamidomethyl (C);Phospho (ST)	57.021465@C:6,79.966331@S:3	1603.69	802.85	1603.68	802.849	0.0015	2	92.8	14.2	Elution from: 60.587 to 60.587 scan no 5586 cid35.00 polarity:+:MA10	60.587	0	26	R	A
GFPT1_HUMAN	Glucosamine--fructose-6-phosphate aminotransferase [isomerizing] 1 OS=Homo sapiens GN=GFPT1 PE=1 SV=3	VDSTTCLFPVEEK	Carbamidomethyl (C);Label:2H(4) (K);Phospho (ST)	57.021465@C:6,4.025107@K:13,79.966331@S:3	1607.71	804.863	1607.71	804.862	0.0017	2	87.8	14.7	Elution from: 60.264 to 60.264 scan no 5684 cid35.00 polarity:+:MA10	60.264	0	26	R	A
GFPT1_HUMAN	Glucosamine--fructose-6-phosphate aminotransferase [isomerizing] 1 OS=Homo sapiens GN=GFPT1 PE=1 SV=3	VDSTTCLFPVEEK	Carbamidomethyl (C);Label:2H(4) (K);Phospho (ST)	57.021465@C:6,4.025107@K:13,79.966332@T:4	1607.71	804.862	1607.71	804.862	0.0011	2	73.6	4.6	Elution from: 60.455 to 60.455 scan no 5666 cid35.00 polarity:+:MA10	60.455	0	25	R	A
GFPT1_HUMAN	Glucosamine--fructose-6-phosphate aminotransferase [isomerizing] 1 OS=Homo sapiens GN=GFPT1 PE=1 SV=3	VDSTTCLFPVEEK	Carbamidomethyl (C);Phospho (ST)	57.021465@C:6,79.966332@T:4	1603.69	802.85	1603.68	802.849	0.002	2	72.2	0	Elution from: 60.606 to 60.606 scan no 5643 cid35.00 polarity:+:MA10	60.606	0	25	R	A
GIT1_HUMAN	ARF GTPase-activating protein GIT1 OS=Homo sapiens GN=GIT1 PE=1 SV=2	HGSGADSDYENTQSGDPLLGLEGK	Phospho (ST);Phospho (Y)	79.966331@S:3,79.966331@Y:9	2606.03	869.682	2606.02	869.681	0.0042	3	56.8	0	Elution from: 64.263 to 64.263 scan no 6006 cid35.00 polarity:+:MA10:m1s	64.263	0	26	R	R
GOGA4_HUMAN	Golgin subfamily A member 4 OS=Homo sapiens GN=GOLGA4 PE=1 SV=1	VPSVESLFR	Phospho (ST)	79.966331@S:3	1112.53	557.272	1112.53	557.271	0.0022	2	41.2	23.9	Elution from: 68.942 to 68.942 scan no 6529 cid35.00 polarity:+:MA10	68.942	0	26	R	S
GOGA4_HUMAN	Golgin subfamily A member 4 OS=Homo sapiens GN=GOLGA4 PE=1 SV=1	TSSFTEQLDEGTPNR	Label:13C(6)15N(4) (R);Phospho (ST)	10.008269@R:15,79.966331@S:2	1770.73	886.375	1770.73	886.374	0.0011	2	26.4	0	Elution from: 49.181 to 49.181 scan no 4529 cid35.00 polarity:+:MA10:m1s	49.181	0	25	R	E
GORS2_HUMAN	Golgi reassembly-stacking protein 2 OS=Homo sapiens GN=GORASP2 PE=1 SV=3	VGDSTPVSEKPVSAAVDANASESP	Label:2H(4) (K);Phospho (ST)	4.025107@K:10,79.966331@S:23	2397.09	800.037	2397.09	800.037	0.0013	3	37.8	6.1	Elution from: 47.371 to 47.371 scan no 4318 cid35.00 polarity:+:MA10:m1s	47.371	0	26	R	-
GORS2_HUMAN	Golgi reassembly-stacking protein 2 OS=Homo sapiens GN=GORASP2 PE=1 SV=3	VGDSTPVSEKPVSAAVDANASESP	Phospho (ST)	79.966331@S:23	2393.07	798.696	2393.06	798.695	0.002	3	35.3	17.1	Elution from: 47.019 to 47.019 scan no 4424 cid35.00 polarity:+:MA10:m1s	47.019	0	26	R	-
GPAT3_HUMAN	Glycerol-3-phosphate acyltransferase 3 OS=Homo sapiens GN=AGPAT9 PE=1 SV=2	NSASVGIIQR	Label:13C(6)15N(4) (R);Phospho (ST)	10.008269@R:10,79.966331@S:4	1133.55	567.78	1133.55	567.781	-0.0006	2	55.8	28.9	Elution from: 40.894 to 40.894 scan no 3595 cid35.00 polarity:+:MA10	40.894	0	26	K	D
GPN1_HUMAN	GPN-loop GTPase 1 OS=Homo sapiens GN=GPN1 PE=1 SV=1	GTLDEEDEEADSDTDDIDHR	Phospho (ST)	79.966331@S:12	2355.85	786.291	2355.85	786.291	0.0015	3	72	20.9	Elution from: 43.685 to 43.685 scan no 3927 cid35.00 polarity:+:MA10:m1s	43.685	0	26	R	V
GPN1_HUMAN	GPN-loop GTPase 1 OS=Homo sapiens GN=GPN1 PE=1 SV=1	GTLDEEDEEADSDTDDIDHR	Label:13C(6)15N(4) (R);Phospho (ST)	10.008269@R:20,79.966331@S:12	2365.86	789.628	2365.86	789.627	0.0032	3	60.3	17.4	Elution from: 43.604 to 43.604 scan no 3889 cid35.00 polarity:+:MA10:m1s	43.604	0	26	R	V
GPTC8_HUMAN	G patch domain-containing protein 8 OS=Homo sapiens GN=GPATCH8 PE=1 SV=2	SQSPHYFR	Phospho (ST)	79.966331@S:3	1100.44	367.822	1100.44	367.822	0.0003	3	22	12.3	Elution from: 34.851 to 34.851 scan no 2794 cid35.00 polarity:+:MA10	34.851	0	25	R	S
GRIN1_HUMAN	G protein-regulated inducer of neurite outgrowth 1 OS=Homo sapiens GN=GPRIN1 PE=1 SV=2	HRSPSGAGEGASCSDGPR	Carbamidomethyl (C);Phospho (ST)	57.021465@C:13,79.966331@S:5	1863.73	622.251	1863.73	622.251	0.0001	3	52.9	1.3	Elution from: 24.819 to 24.819 scan no 1467 cid35.00 polarity:+:MA10:m1s	24.819	1	26	R	G
GSK3B_HUMAN	Glycogen synthase kinase-3 beta OS=Homo sapiens GN=GSK3B PE=1 SV=2	GEPNVSYICSR	Carbamidomethyl (C);Label:13C(6)15N(4) (R);Phospho (Y)	57.021465@C:9,10.008269@R:11,79.966331@Y:7	1370.56	686.286	1370.56	686.286	0.0005	2	49	11.4	Elution from: 43.402 to 43.402 scan no 3902 cid35.00 polarity:+:MA10	43.402	0	26	R	Y
GSK3B_HUMAN	Glycogen synthase kinase-3 beta OS=Homo sapiens GN=GSK3B PE=1 SV=2	GEPNVSYICSR	Carbamidomethyl (C);Phospho (Y)	57.021465@C:9,79.966331@Y:7	1360.55	681.28	1360.55	681.281	-0.0019	2	37.5	6.3	Elution from: 43.820 to 43.820 scan no 3943 cid35.00 polarity:+:MA10	43.82	0	26	R	Y
GTF2I_HUMAN	General transcription factor II-I OS=Homo sapiens GN=GTF2I PE=1 SV=2	TNTPVKEDWNVR	Phospho (ST)	79.966332@T:3	1537.69	513.572	1537.69	513.571	0.0001	3	39.9	16.5	Elution from: 42.592 to 42.592 scan no 3914 cid35.00 polarity:+:MA10	42.592	1	26	R	I
H14_HUMAN	Histone H1.4 OS=Homo sapiens GN=HIST1H1E PE=1 SV=2	SETAPAAPAAPAPAEKTPVK	Phospho (ST)	79.966332@T:17	1982.97	661.998	1982.97	661.998	0.0019	3	33.3	25.3	Elution from: 35.415 to 35.415 scan no 2872 cid35.00 polarity:+:MA10:m1s	35.415	1	25	M	K
H15_HUMAN	Histone H1.5 OS=Homo sapiens GN=HIST1H1B PE=1 SV=3	SETAPAETATPAPVEKSPAK	2 Label:2H(4) (K);Phospho (ST)	4.025107@K:16,4.025107@K:20,79.966331@S:17	2069.02	690.68	2069.02	690.68	0.0001	3	55.2	16.3	Elution from: 34.094 to 34.094 scan no 2695 cid35.00 polarity:+:MA10:m1s	34.094	1	25	M	K
H15_HUMAN	Histone H1.5 OS=Homo sapiens GN=HIST1H1B PE=1 SV=3	SETAPAETATPAPVEKSPAKK	3 Label:2H(4) (K);Phospho (ST)	4.025107@K:16,4.025107@K:20,4.025107@K:21,79.966331@S:17	2201.14	734.72	2201.14	734.72	0.0014	3	28.8	3.1	Elution from: 30.650 to 30.650 scan no 2175 cid35.00 polarity:+:MA10:m1s	30.65	2	26	M	K
H90B2_HUMAN	Putative heat shock protein HSP 90-beta 2 OS=Homo sapiens GN=HSP90AB2P PE=1 SV=2	IEDVGSDEEDDSGKDKK	Phospho (ST)	79.966331@S:6	1944.78	649.269	1944.78	649.269	0.0006	3	32	20.3	Elution from: 27.923 to 27.923 scan no 1888 cid35.00 polarity:+:MA10:m1s	27.923	2	26	K	K
HACD3_HUMAN	3-hydroxyacyl-CoA dehydratase 3 OS=Homo sapiens GN=PTPLAD1 PE=1 SV=2	WLDESDAEMELR	Label:13C(6)15N(4) (R);Oxidation (M);Phospho (ST)	10.008269@R:12,15.994915@M:9,79.966331@S:5	1598.62	800.318	1598.62	800.317	0.0012	2	51.5	51.5	Elution from: 62.857 to 62.857 scan no 5793 cid35.00 polarity:+:MA10	62.857	0	26	R	A
HACD3_HUMAN	3-hydroxyacyl-CoA dehydratase 3 OS=Homo sapiens GN=PTPLAD1 PE=1 SV=2	WLDESDAEMELR	Label:13C(6)15N(4) (R);Phospho (ST)	10.008269@R:12,79.966331@S:5	1582.63	792.32	1582.62	792.32	0.0009	2	29.9	23.8	Elution from: 66.385 to 66.385 scan no 6106 cid35.00 polarity:+:MA10	66.385	0	26	R	A
HAP28_HUMAN	28 kDa heat- and acid-stable phosphoprotein OS=Homo sapiens GN=PDAP1 PE=1 SV=1	KSLDSDESEDEEDDYQQK	2 Phospho (ST)	79.966331@S:5,79.966331@S:8	2318.8	1160.41	2318.8	1160.41	0.0034	2	72.4	26.3	Elution from: 38.504 to 38.504 scan no 3251 cid35.00 polarity:+:MA10:m1s	38.504	1	26	K	R
HAP28_HUMAN	28 kDa heat- and acid-stable phosphoprotein OS=Homo sapiens GN=PDAP1 PE=1 SV=1	KSLDSDESEDEEDDYQQK	2 Label:2H(4) (K);2 Phospho (ST)	4.025107@K:1,4.025107@K:18,79.966331@S:5,79.966331@S:8	2326.85	1164.43	2326.85	1164.43	0.0011	2	71.2	27.2	Elution from: 38.737 to 38.737 scan no 3339 cid35.00 polarity:+:MA10:m1s	38.737	1	25	K	R
HAP28_HUMAN	28 kDa heat- and acid-stable phosphoprotein OS=Homo sapiens GN=PDAP1 PE=1 SV=1	SLDSDESEDEEDDYQQK	Label:2H(4) (K);2 Phospho (ST)	4.025107@K:17,79.966331@S:4,79.966331@S:7	2194.73	732.585	2194.73	732.584	0.0026	3	61.1	0	Elution from: 41.721 to 41.721 scan no 3742 cid35.00 polarity:+:MA10:m1s	41.721	0	25	K	R
HAP28_HUMAN	28 kDa heat- and acid-stable phosphoprotein OS=Homo sapiens GN=PDAP1 PE=1 SV=1	SLDSDESEDEEDDYQQK	Label:2H(4) (K);2 Phospho (ST)	4.025107@K:17,79.966331@S:1,79.966331@S:7	2194.73	1098.37	2194.73	1098.37	0.0022	2	58.7	1.9	Elution from: 41.322 to 41.322 scan no 3795 cid35.00 polarity:+:MA10:m1s	41.322	0	26	K	R
HAP28_HUMAN	28 kDa heat- and acid-stable phosphoprotein OS=Homo sapiens GN=PDAP1 PE=1 SV=1	EKKSLDSDESEDEEDDYQQK	3 Label:2H(4) (K);3 Phospho (ST)	4.025107@K:2,4.025107@K:3,4.025107@K:20,79.966331@S:4,79.966331@S:7,79.966331@S:10	2667.98	890.334	2667.98	890.333	0.0016	3	40.1	26.4	Elution from: 35.510 to 35.510 scan no 2835 cid35.00 polarity:+:MA10:m1s	35.51	2	26	K	R
HAP28_HUMAN	28 kDa heat- and acid-stable phosphoprotein OS=Homo sapiens GN=PDAP1 PE=1 SV=1	KSLDSDESEDEEDDYQQK	2 Label:2H(4) (K);2 Phospho (ST)	4.025107@K:1,4.025107@K:18,79.966331@S:2,79.966331@S:8	2326.85	776.624	2326.85	776.624	0.0019	3	36.2	0.7	Elution from: 38.477 to 38.477 scan no 3247 cid35.00 polarity:+:MA10:m1s	38.477	1	26	K	R
HAP28_HUMAN	28 kDa heat- and acid-stable phosphoprotein OS=Homo sapiens GN=PDAP1 PE=1 SV=1	KSLDSDESEDEEDDYQQK	2 Label:2H(4) (K);2 Phospho (ST)	4.025107@K:1,4.025107@K:18,79.966331@S:2,79.966331@S:5	2326.85	776.624	2326.85	776.624	0.0017	3	36.1	0.9	Elution from: 38.432 to 38.432 scan no 3265 cid35.00 polarity:+:MA10:m1s	38.432	1	26	K	R
HAP28_HUMAN	28 kDa heat- and acid-stable phosphoprotein OS=Homo sapiens GN=PDAP1 PE=1 SV=1	KSLDSDESEDEEDDYQQK	2 Phospho (ST)	79.966331@S:2,79.966331@S:5	2318.8	773.941	2318.8	773.94	0.0023	3	35.8	1	Elution from: 38.515 to 38.515 scan no 3247 cid35.00 polarity:+:MA10:m1s	38.515	1	25	K	R
HDAC1_HUMAN	Histone deacetylase 1 OS=Homo sapiens GN=HDAC1 PE=1 SV=1	RIACEEEFSDSEEEGEGGRK	Carbamidomethyl (C);2 Phospho (ST)	57.021465@C:4,79.966331@S:9,79.966331@S:11	2472.92	825.312	2472.91	825.312	0.0013	3	40.6	31	Elution from: 38.964 to 38.964 scan no 3441 cid35.00 polarity:+:MA10:m1s	38.964	2	26	K	N
HDAC1_HUMAN	Histone deacetylase 1 OS=Homo sapiens GN=HDAC1 PE=1 SV=1	IACEEEFSDSEEEGEGGRK	Carbamidomethyl (C);Label:13C(6)15N(4) (R);Label:2H(4) (K);2 Phospho (ST)	57.021465@C:3,10.008269@R:18,4.025107@K:19,79.966331@S:8,79.966331@S:10	2330.85	777.957	2330.85	777.956	0.0019	3	39.3	33.6	Elution from: 40.956 to 40.956 scan no 3642 cid35.00 polarity:+:MA10:m1s	40.956	1	25	R	N
HDAC1_HUMAN	Histone deacetylase 1 OS=Homo sapiens GN=HDAC1 PE=1 SV=1	RIACEEEFSDSEEEGEGGRK	Carbamidomethyl (C);2 Label:13C(6)15N(4) (R);Label:2H(4) (K);2 Phospho (ST)	57.021465@C:4,10.008269@R:1,10.008269@R:19,4.025107@K:20,79.966331@S:9,79.966331@S:11	2496.96	833.327	2496.96	833.326	0.0034	3	37.1	21.6	Elution from: 40.045 to 40.045 scan no 3585 cid35.00 polarity:+:MA10:m1s	40.045	2	26	K	N
HDAC1_HUMAN	Histone deacetylase 1 OS=Homo sapiens GN=HDAC1 PE=1 SV=1	IACEEEFSDSEEEGEGGRK	Carbamidomethyl (C);2 Phospho (ST)	57.021465@C:3,79.966331@S:8,79.966331@S:10	2316.82	773.279	2316.81	773.278	0.0034	3	32.6	27.9	Elution from: 40.854 to 40.854 scan no 3550 cid35.00 polarity:+:MA10:m1s	40.854	1	25	R	N
HDAC2_HUMAN	Histone deacetylase 2 OS=Homo sapiens GN=HDAC2 PE=1 SV=2	RIACDEEFSDSEDEGEGGRR	Carbamidomethyl (C);2 Phospho (ST)	57.021465@C:4,79.966331@S:9,79.966331@S:11	2472.89	619.23	2472.89	619.23	0.0011	4	47.9	40.9	Elution from: 38.729 to 38.729 scan no 3281 cid35.00 polarity:+:MA10:m1s	38.729	2	26	K	N
HDAC2_HUMAN	Histone deacetylase 2 OS=Homo sapiens GN=HDAC2 PE=1 SV=2	IACDEEFSDSEDEGEGGRR	Carbamidomethyl (C);2 Phospho (ST)	57.021465@C:3,79.966331@S:8,79.966331@S:10	2316.79	773.27	2316.79	773.27	0.0017	3	45.2	43.5	Elution from: 40.267 to 40.267 scan no 3656 cid35.00 polarity:+:MA10:m1s	40.267	1	26	R	N
HDAC2_HUMAN	Histone deacetylase 2 OS=Homo sapiens GN=HDAC2 PE=1 SV=2	IACDEEFSDSEDEGEGGRR	Carbamidomethyl (C);2 Label:13C(6)15N(4) (R);2 Phospho (ST)	57.021465@C:3,10.008269@R:18,10.008269@R:19,79.966331@S:8,79.966331@S:10	2336.81	779.942	2336.8	779.942	0.0011	3	29.4	22.4	Elution from: 40.356 to 40.356 scan no 3498 cid35.00 polarity:+:MA10:m1s	40.356	1	26	R	N
HDAC7_HUMAN	Histone deacetylase 7 OS=Homo sapiens GN=HDAC7 PE=1 SV=2	AQSSPAAPASLSAPEPASQAR	Phospho (ST)	79.966331@S:4	2072.95	691.992	2072.95	691.992	0.0004	3	37.3	0	Elution from: 44.484 to 44.484 scan no 3986 cid35.00 polarity:+:MA10:m1s	44.484	0	26	R	V
HDAC7_HUMAN	Histone deacetylase 7 OS=Homo sapiens GN=HDAC7 PE=1 SV=2	AQSSPAAPASLSAPEPASQAR	Phospho (ST)	79.966331@S:3	2072.95	691.992	2072.95	691.992	0.0019	3	36	0.5	Elution from: 44.595 to 44.595 scan no 4035 cid35.00 polarity:+:MA10:m1s	44.595	0	26	R	V
HDGF_HUMAN	Hepatoma-derived growth factor OS=Homo sapiens GN=HDGF PE=1 SV=1	GNAEGSSDEEGKLVIDEPAK	2 Label:2H(4) (K);2 Phospho (ST)	4.025107@K:12,4.025107@K:20,79.966331@S:6,79.966331@S:7	2211.94	1106.98	2211.94	1106.98	0.002	2	73.1	57.9	Elution from: 48.588 to 48.588 scan no 4586 cid35.00 polarity:+:MA10:m1s	48.588	1	26	K	E
HDGF_HUMAN	Hepatoma-derived growth factor OS=Homo sapiens GN=HDGF PE=1 SV=1	KGNAEGSSDEEGKLVIDEPAK	2 Phospho (ST)	79.966331@S:7,79.966331@S:8	2331.99	1167	2331.99	1167	0.0023	2	70.1	53	Elution from: 44.588 to 44.588 scan no 3984 cid35.00 polarity:+:MA10:m1s	44.588	2	25	K	E
HDGF_HUMAN	Hepatoma-derived growth factor OS=Homo sapiens GN=HDGF PE=1 SV=1	GNAEGSSDEEGKLVIDEPAK	2 Phospho (ST)	79.966331@S:6,79.966331@S:7	2203.89	1102.95	2203.89	1102.95	0.0017	2	69.5	54.5	Elution from: 49.318 to 49.318 scan no 4542 cid35.00 polarity:+:MA10	49.318	1	26	K	E
HDGF_HUMAN	Hepatoma-derived growth factor OS=Homo sapiens GN=HDGF PE=1 SV=1	SCVEEPEPEPEAAEGDGDKKGNAEGSSDEEGK	Carbamidomethyl (C);2 Phospho (ST)	57.021465@C:2,79.966331@S:26,79.966331@S:27	3492.31	1165.11	3492.31	1165.11	0.0043	3	68.8	62.1	Elution from: 37.793 to 37.793 scan no 3160 cid35.00 polarity:+:MA10:m1s	37.793	2	26	K	L
HDGF_HUMAN	Hepatoma-derived growth factor OS=Homo sapiens GN=HDGF PE=1 SV=1	AGDLLEDSPKRPK	Phospho (ST)	79.966331@S:8	1504.73	502.584	1504.73	502.583	0.0008	3	65.3	46	Elution from: 34.210 to 34.210 scan no 2799 cid35.00 polarity:+:MA10	34.21	1	26	R	E
HDGF_HUMAN	Hepatoma-derived growth factor OS=Homo sapiens GN=HDGF PE=1 SV=1	AGDLLEDSPK	Phospho (ST)	79.966331@S:8	1123.48	562.747	1123.48	562.747	0.0004	2	59.9	36.2	Elution from: 42.088 to 42.088 scan no 3716 cid35.00 polarity:+:MA10	42.088	0	26	R	R
HDGF_HUMAN	Hepatoma-derived growth factor OS=Homo sapiens GN=HDGF PE=1 SV=1	AGDLLEDSPK	Label:2H(4) (K);Phospho (ST)	4.025107@K:10,79.966331@S:8	1127.51	564.76	1127.5	564.76	0.0002	2	59.6	52.1	Elution from: 42.367 to 42.367 scan no 3891 cid35.00 polarity:+:MA10	42.367	0	25	R	R
HDGF_HUMAN	Hepatoma-derived growth factor OS=Homo sapiens GN=HDGF PE=1 SV=1	KGNAEGSSDEEGKLVIDEPAK	3 Label:2H(4) (K);2 Phospho (ST)	4.025107@K:1,4.025107@K:13,4.025107@K:21,79.966331@S:7,79.966331@S:8	2344.06	587.023	2344.06	587.023	0.0003	4	59.2	27.5	Elution from: 43.818 to 43.818 scan no 4065 cid35.00 polarity:+:MA10	43.818	2	26	K	E
HDGF_HUMAN	Hepatoma-derived growth factor OS=Homo sapiens GN=HDGF PE=1 SV=1	AGDLLEDSPKRPK	Label:13C(6)15N(4) (R);2 Label:2H(4) (K);Phospho (ST)	10.008269@R:11,4.025107@K:10,4.025107@K:13,79.966331@S:8	1522.79	508.603	1522.79	508.603	-0.0002	3	46.3	29.5	Elution from: 34.217 to 34.217 scan no 2672 cid35.00 polarity:+:MA10	34.217	1	26	R	E
HDGF_HUMAN	Hepatoma-derived growth factor OS=Homo sapiens GN=HDGF PE=1 SV=1	GNAEGSSDEEGKLVIDEPAK	Phospho (ST)	79.966331@S:6	2123.93	708.983	2123.93	708.983	0.0012	3	38	7.1	Elution from: 45.195 to 45.195 scan no 4065 cid35.00 polarity:+:MA10:m1s	45.195	1	25	K	E
HDGF_HUMAN	Hepatoma-derived growth factor OS=Homo sapiens GN=HDGF PE=1 SV=1	KGNAEGSSDEEGKLVIDEPAK	Phospho (ST)	79.966331@S:7	2252.02	751.682	2252.02	751.681	0.0021	3	33.9	3.2	Elution from: 40.882 to 40.882 scan no 3554 cid35.00 polarity:+:MA10:m1s	40.882	2	25	K	E
HDGF_HUMAN	Hepatoma-derived growth factor OS=Homo sapiens GN=HDGF PE=1 SV=1	KGNAEGSSDEEGKLVIDEPAK	Phospho (ST)	79.966331@S:8	2252.02	751.681	2252.02	751.681	0.0013	3	30.4	0	Elution from: 40.930 to 40.930 scan no 3600 cid35.00 polarity:+:MA10:m1s	40.93	2	26	K	E
HDGF_HUMAN	Hepatoma-derived growth factor OS=Homo sapiens GN=HDGF PE=1 SV=1	RAGDLLEDSPKRPK	Phospho (ST)	79.966331@S:9	1660.83	416.215	1660.83	416.215	0.0004	4	27.2	11.1	Elution from: 32.181 to 32.181 scan no 2377 cid35.00 polarity:+:MA10:m1s	32.181	2	25	R	E
HDGR2_HUMAN	Hepatoma-derived growth factor-related protein 2 OS=Homo sapiens GN=HDGFRP2 PE=1 SV=1	ARGDSEALDEES	Phospho (ST)	79.966331@S:5	1357.5	679.759	1357.5	679.759	0.0002	2	41.3	28.9	Elution from: 33.456 to 33.456 scan no 2555 cid35.00 polarity:+:MA10	33.456	1	26	R	-
HDGR2_HUMAN	Hepatoma-derived growth factor-related protein 2 OS=Homo sapiens GN=HDGFRP2 PE=1 SV=1	EGPDLDRPGSDRQER	Phospho (ST)	79.966331@S:10	1805.77	602.93	1805.77	602.93	0.0002	3	39.8	31.3	Elution from: 31.012 to 31.012 scan no 2215 cid35.00 polarity:+:MA10	31.012	1	25	R	E
HELLS_HUMAN	Lymphoid-specific helicase OS=Homo sapiens GN=HELLS PE=1 SV=1	ILENSEDSSPECLF	Carbamidomethyl (C);Phospho (ST)	57.021465@C:12,79.966331@S:9	1718.68	860.345	1718.67	860.345	0.0016	2	41.7	0	Elution from: 72.949 to 72.949 scan no 6739 cid35.00 polarity:+:MA10:m1s	72.949	0	26	K	-
HIRP3_HUMAN	HIRA-interacting protein 3 OS=Homo sapiens GN=HIRIP3 PE=1 SV=3	RLLGDSDSEEEQK	Label:13C(6)15N(4) (R);Label:2H(4) (K);2 Phospho (ST)	10.008269@R:1,4.025107@K:13,79.966331@S:6,79.966331@S:8	1678.67	840.341	1678.67	840.341	0.0017	2	37.2	31.2	Elution from: 37.886 to 37.886 scan no 3168 cid35.00 polarity:+:MA10	37.886	1	25	K	E
HIRP3_HUMAN	HIRA-interacting protein 3 OS=Homo sapiens GN=HIRIP3 PE=1 SV=3	SLKESEQESEEEILAQKK	3 Label:2H(4) (K);2 Phospho (ST)	4.025107@K:3,4.025107@K:17,4.025107@K:18,79.966331@S:5,79.966331@S:9	2276.06	759.695	2276.06	759.694	0.002	3	32.9	21.4	Elution from: 42.968 to 42.968 scan no 3863 cid35.00 polarity:+:MA10:m1s	42.968	2	26	K	E
HIRP3_HUMAN	HIRA-interacting protein 3 OS=Homo sapiens GN=HIRIP3 PE=1 SV=3	SLKESEQESEEEILAQKK	2 Phospho (ST)	79.966331@S:5,79.966331@S:9	2263.99	755.67	2263.99	755.669	0.0029	3	29.8	20.3	Elution from: 42.749 to 42.749 scan no 3980 cid35.00 polarity:+:MA10:m1s	42.749	2	26	K	E
HIRP3_HUMAN	HIRA-interacting protein 3 OS=Homo sapiens GN=HIRIP3 PE=1 SV=3	QAREESEESEAEPVQR	2 Phospho (ST)	79.966331@S:6,79.966331@S:9	2032.78	678.6	2032.78	678.6	0	3	27.4	22.2	Elution from: 30.956 to 30.956 scan no 2310 cid35.00 polarity:+:MA10	30.956	1	26	K	T
HIRP3_HUMAN	HIRA-interacting protein 3 OS=Homo sapiens GN=HIRIP3 PE=1 SV=3	RPPTPCSDPERK	Carbamidomethyl (C);2 Phospho (ST)	57.021465@C:6,79.966332@T:4,79.966331@S:7	1598.63	533.885	1598.63	533.884	0.0013	3	24.3	19.3	Elution from: 26.139 to 26.139 scan no 1577 cid35.00 polarity:+:MA10	26.139	1	26	K	R
HM20A_HUMAN	High mobility group protein 20A OS=Homo sapiens GN=HMG20A PE=1 SV=1	DSNAPKSPLTGYVR	Phospho (ST)	79.966331@S:7	1583.74	528.919	1583.73	528.919	0.0013	3	34.3	11	Elution from: 44.789 to 44.789 scan no 4095 cid35.00 polarity:+:MA10:m1s	44.789	1	25	R	F
HMGA1_HUMAN	High mobility group protein HMG-I/HMG-Y OS=Homo sapiens GN=HMGA1 PE=1 SV=3	KLEKEEEEGISQESSEEEQ	Phospho (ST)	79.966331@S:14	2315.96	1158.99	2315.95	1158.98	0.0043	2	104.8	11.6	Elution from: 34.843 to 34.843 scan no 2793 cid35.00 polarity:+:MA10:m1s	34.843	2	25	K	-
HMGA1_HUMAN	High mobility group protein HMG-I/HMG-Y OS=Homo sapiens GN=HMGA1 PE=1 SV=3	KLEKEEEEGISQESSEEEQ	2 Label:2H(4) (K);2 Phospho (ST)	4.025107@K:1,4.025107@K:4,79.966331@S:14,79.966331@S:15	2403.97	1202.99	2403.97	1202.99	0.0024	2	91.3	27.5	Elution from: 36.646 to 36.646 scan no 2994 cid35.00 polarity:+:MA10:m1s	36.646	2	26	K	-
HMGA1_HUMAN	High mobility group protein HMG-I/HMG-Y OS=Homo sapiens GN=HMGA1 PE=1 SV=3	KLEKEEEEGISQESSEEEQ	2 Phospho (ST)	79.966331@S:14,79.966331@S:15	2395.92	799.648	2395.92	799.647	0.0026	3	86.6	30	Elution from: 36.505 to 36.505 scan no 3023 cid35.00 polarity:+:MA10:m1s	36.505	2	25	K	-
HMGA1_HUMAN	High mobility group protein HMG-I/HMG-Y OS=Homo sapiens GN=HMGA1 PE=1 SV=3	KLEKEEEEGISQESSEEEQ	Phospho (ST)	79.966331@S:15	2315.95	772.992	2315.95	772.992	0.002	3	74.9	2.9	Elution from: 35.084 to 35.084 scan no 2902 cid35.00 polarity:+:MA10:m1s	35.084	2	25	K	-
HMGA1_HUMAN	High mobility group protein HMG-I/HMG-Y OS=Homo sapiens GN=HMGA1 PE=1 SV=3	KLEKEEEEGISQESSEEEQ	2 Label:2H(4) (K);Phospho (ST)	4.025107@K:1,4.025107@K:4,79.966331@S:15	2324.01	775.676	2324	775.675	0.0021	3	69.5	0	Elution from: 34.653 to 34.653 scan no 2829 cid35.00 polarity:+:MA10:m1s	34.653	2	26	K	-
HMGA1_HUMAN	High mobility group protein HMG-I/HMG-Y OS=Homo sapiens GN=HMGA1 PE=1 SV=3	EEEEGISQESSEEEQ	2 Phospho (ST)	79.966331@S:10,79.966331@S:11	1897.6	949.81	1897.6	949.809	0.002	2	69.5	36.1	Elution from: 37.723 to 37.723 scan no 3192 cid35.00 polarity:+:MA10:m1s	37.723	0	25	K	-
HMGA1_HUMAN	High mobility group protein HMG-I/HMG-Y OS=Homo sapiens GN=HMGA1 PE=1 SV=3	KLEKEEEEGISQESSEEEQ	2 Label:2H(4) (K);3 Phospho (ST)	4.025107@K:1,4.025107@K:4,79.966331@S:11,79.966331@S:14,79.966331@S:15	2483.94	1242.98	2483.94	1242.98	0.0011	2	67.4	59.5	Elution from: 38.152 to 38.152 scan no 3203 cid35.00 polarity:+:MA10:m1s	38.152	2	25	K	-
HMGA1_HUMAN	High mobility group protein HMG-I/HMG-Y OS=Homo sapiens GN=HMGA1 PE=1 SV=3	KLEKEEEEGISQESSEEEQ	3 Phospho (ST)	79.966331@S:11,79.966331@S:14,79.966331@S:15	2475.89	826.303	2475.89	826.302	0.0015	3	55.7	48.1	Elution from: 38.493 to 38.493 scan no 3304 cid35.00 polarity:+:MA10:m1s	38.493	2	25	K	-
HMGA1_HUMAN	High mobility group protein HMG-I/HMG-Y OS=Homo sapiens GN=HMGA1 PE=1 SV=3	EEEEGISQESSEEEQ	Phospho (ST)	79.966331@S:10	1817.64	909.828	1817.64	909.825	0.005	2	49.1	1.1	Elution from: 35.692 to 35.692 scan no 2911 cid35.00 polarity:+:MA10:m1s	35.692	0	25	K	-
HMGA1_HUMAN	High mobility group protein HMG-I/HMG-Y OS=Homo sapiens GN=HMGA1 PE=1 SV=3	KLEKEEEEGISQESSEEEQ	2 Label:2H(4) (K);Phospho (ST)	4.025107@K:1,4.025107@K:4,79.966331@S:14	2324	775.675	2324	775.675	0.0012	3	48.2	1.4	Elution from: 34.803 to 34.803 scan no 2732 cid35.00 polarity:+:MA10:m1s	34.803	2	26	K	-
HMGA1_HUMAN	High mobility group protein HMG-I/HMG-Y OS=Homo sapiens GN=HMGA1 PE=1 SV=3	KQPPVSPGTALVGSQK	2 Label:2H(4) (K);Phospho (ST)	4.025107@K:1,4.025107@K:16,79.966331@S:6	1680.91	561.309	1680.91	561.309	0.0008	3	46.3	18.8	Elution from: 40.297 to 40.297 scan no 3530 cid35.00 polarity:+:MA10:m1s	40.297	1	25	R	E
HMGA1_HUMAN	High mobility group protein HMG-I/HMG-Y OS=Homo sapiens GN=HMGA1 PE=1 SV=3	KQPPVSPGTALVGSQKEPSEVPTPK	2 Phospho (ST)	79.966331@S:6,79.966332@T:23	2717.31	680.335	2717.31	680.334	0.0014	4	43.1	1.8	Elution from: 47.678 to 47.678 scan no 4392 cid35.00 polarity:+:MA10:m1s	47.678	2	25	R	R
HMGA1_HUMAN	High mobility group protein HMG-I/HMG-Y OS=Homo sapiens GN=HMGA1 PE=1 SV=3	EEEEGISQESSEEEQ	Phospho (ST)	79.966331@S:11	1817.64	909.828	1817.64	909.825	0.0046	2	39.7	0	Elution from: 35.864 to 35.864 scan no 3020 cid35.00 polarity:+:MA10:m1s	35.864	0	25	K	-
HMGA1_HUMAN	High mobility group protein HMG-I/HMG-Y OS=Homo sapiens GN=HMGA1 PE=1 SV=3	KQPPVSPGTALVGSQK	Phospho (ST)	79.966331@S:6	1672.85	558.626	1672.85	558.626	-0.0001	3	35.1	12.3	Elution from: 40.160 to 40.160 scan no 3517 cid35.00 polarity:+:MA10	40.16	1	25	R	E
HMGA1_HUMAN	High mobility group protein HMG-I/HMG-Y OS=Homo sapiens GN=HMGA1 PE=1 SV=3	KLEKEEEEGISQESSEEEQ	2 Label:2H(4) (K);2 Phospho (ST)	4.025107@K:1,4.025107@K:4,79.966331@S:11,79.966331@S:14	2403.97	1202.99	2403.97	1202.99	0.0024	2	31.2	1	Elution from: 36.062 to 36.062 scan no 2905 cid35.00 polarity:+:MA10:m1s	36.062	2	25	K	-
HMGA1_HUMAN	High mobility group protein HMG-I/HMG-Y OS=Homo sapiens GN=HMGA1 PE=1 SV=3	KQPPVSPGTALVGSQK	2 Label:2H(4) (K);Phospho (ST)	4.025107@K:1,4.025107@K:16,79.966332@T:9	1680.91	561.309	1680.91	561.309	0.0011	3	25	1.6	Elution from: 40.259 to 40.259 scan no 3609 cid35.00 polarity:+:MA10	40.259	1	26	R	E
HMOX1_HUMAN	Heme oxygenase 1 OS=Homo sapiens GN=HMOX1 PE=1 SV=1	DQSPSRAPGLR	Phospho (ST)	79.966331@S:3	1262.58	632.296	1262.58	632.296	-0.0002	2	41.8	8	Elution from: 29.981 to 29.981 scan no 2181 cid35.00 polarity:+:MA10	29.981	1	26	K	Q
HMOX1_HUMAN	Heme oxygenase 1 OS=Homo sapiens GN=HMOX1 PE=1 SV=1	DQSPSRAPGLR	Phospho (ST)	79.966331@S:5	1262.58	632.295	1262.58	632.296	-0.0003	2	40.1	0.8	Elution from: 29.924 to 29.924 scan no 2199 cid35.00 polarity:+:MA10	29.924	1	26	K	Q
HN1_HUMAN	Hematological and neurological expressed 1 protein OS=Homo sapiens GN=HN1 PE=1 SV=3	RNSSEASSGDFLDLK	Label:13C(6)15N(4) (R);Label:2H(4) (K);Phospho (ST)	10.008269@R:1,4.025107@K:15,79.966331@S:3	1718.77	860.393	1718.77	860.392	0.0016	2	109.8	17.4	Elution from: 54.290 to 54.290 scan no 5167 cid35.00 polarity:+:MA10	54.29	1	25	R	G
HN1_HUMAN	Hematological and neurological expressed 1 protein OS=Homo sapiens GN=HN1 PE=1 SV=3	NSSEASSGDFLDLK	Phospho (ST)	79.966331@S:2	1548.64	775.325	1548.63	775.325	0.0008	2	78.2	14.6	Elution from: 61.476 to 61.476 scan no 5742 cid35.00 polarity:+:MA10	61.476	0	26	R	G
HN1_HUMAN	Hematological and neurological expressed 1 protein OS=Homo sapiens GN=HN1 PE=1 SV=3	RNSSEASSGDFLDLK	Phospho (ST)	79.966331@S:4	1704.74	853.377	1704.74	853.375	0.004	2	75.2	2.1	Elution from: 54.552 to 54.552 scan no 5123 cid35.00 polarity:+:MA10:m1s	54.552	1	26	R	G
HN1_HUMAN	Hematological and neurological expressed 1 protein OS=Homo sapiens GN=HN1 PE=1 SV=3	RNSSEASSGDFLDLK	Label:13C(6)15N(4) (R);Label:2H(4) (K);Phospho (ST)	10.008269@R:1,4.025107@K:15,79.966331@S:4	1718.77	573.931	1718.77	573.93	0.0008	3	69.3	3.1	Elution from: 54.561 to 54.561 scan no 5070 cid35.00 polarity:+:MA10	54.561	1	26	R	G
HN1_HUMAN	Hematological and neurological expressed 1 protein OS=Homo sapiens GN=HN1 PE=1 SV=3	RNSSEASSGDFLDLK	Phospho (ST)	79.966331@S:3	1704.74	853.376	1704.74	853.375	0.0026	2	59.6	9.3	Elution from: 54.460 to 54.460 scan no 5086 cid35.00 polarity:+:MA10	54.46	1	25	R	G
HNRH1_HUMAN	Heterogeneous nuclear ribonucleoprotein H OS=Homo sapiens GN=HNRNPH1 PE=1 SV=4	HTGPNSPDTANDGFVR	Label:13C(6)15N(4) (R);Phospho (ST)	10.008269@R:16,79.966332@T:9	1773.74	887.876	1773.73	887.875	0.0031	2	49.8	1.5	Elution from: 37.341 to 37.341 scan no 3120 cid35.00 polarity:+:MA10	37.341	0	26	K	L
HNRH1_HUMAN	Heterogeneous nuclear ribonucleoprotein H OS=Homo sapiens GN=HNRNPH1 PE=1 SV=4	HTGPNSPDTANDGFVR	Phospho (ST)	79.966332@T:2	1763.73	588.916	1763.73	588.916	0.0001	3	46.9	9.8	Elution from: 37.328 to 37.328 scan no 3118 cid35.00 polarity:+:MA10	37.328	0	26	K	L
HNRH2_HUMAN	Heterogeneous nuclear ribonucleoprotein H2 OS=Homo sapiens GN=HNRNPH2 PE=1 SV=1	HTGPNSPDTANDGFVR	Label:13C(6)15N(4) (R);Phospho (ST)	10.008269@R:16,79.966331@S:6	1773.74	887.875	1773.73	887.875	0.0006	2	63.7	9.1	Elution from: 37.283 to 37.283 scan no 3250 cid35.00 polarity:+:MA10:m1s	37.283	0	26	K	L
HNRH2_HUMAN	Heterogeneous nuclear ribonucleoprotein H2 OS=Homo sapiens GN=HNRNPH2 PE=1 SV=1	HTGPNSPDTANDGFVR	Phospho (ST)	79.966331@S:6	1763.73	882.872	1763.73	882.871	0.0026	2	61.9	12.4	Elution from: 37.211 to 37.211 scan no 3239 cid35.00 polarity:+:MA10	37.211	0	26	K	L
HNRH2_HUMAN	Heterogeneous nuclear ribonucleoprotein H2 OS=Homo sapiens GN=HNRNPH2 PE=1 SV=1	HTGPNSPDTANDGFVR	Phospho (ST)	79.966332@T:9	1763.73	882.871	1763.73	882.871	0.0009	2	54.7	6.4	Elution from: 37.170 to 37.170 scan no 3188 cid35.00 polarity:+:MA10	37.17	0	26	K	L
HNRL2_HUMAN	Heterogeneous nuclear ribonucleoprotein U-like protein 2 OS=Homo sapiens GN=HNRNPUL2 PE=1 SV=1	EEDEPEERSGDETPGSEVPGDK	Label:13C(6)15N(4) (R);Label:2H(4) (K);Phospho (ST)	10.008269@R:8,4.025107@K:22,79.966331@S:9	2480.99	828.004	2480.99	828.003	0.0018	3	55.6	33.2	Elution from: 36.827 to 36.827 scan no 3138 cid35.00 polarity:+:MA10:m1s	36.827	1	26	R	A
HNRL2_HUMAN	Heterogeneous nuclear ribonucleoprotein U-like protein 2 OS=Homo sapiens GN=HNRNPUL2 PE=1 SV=1	EEDEPEERSGDETPGSEVPGDK	Phospho (ST)	79.966331@S:9	2466.95	823.326	2466.95	823.326	-0.0001	3	40.1	23.4	Elution from: 36.364 to 36.364 scan no 3094 cid35.00 polarity:+:MA10:m1s	36.364	1	26	R	A
HNRL2_HUMAN	Heterogeneous nuclear ribonucleoprotein U-like protein 2 OS=Homo sapiens GN=HNRNPUL2 PE=1 SV=1	REEDEPEERSGDETPGSEVPGDK	2 Label:13C(6)15N(4) (R);Label:2H(4) (K);Phospho (ST)	10.008269@R:1,10.008269@R:9,4.025107@K:23,79.966331@S:10	2647.1	883.374	2647.1	883.373	0.0024	3	37.6	9.5	Elution from: 34.575 to 34.575 scan no 2720 cid35.00 polarity:+:MA10:m1s	34.575	2	26	K	A
HNRPC_HUMAN	Heterogeneous nuclear ribonucleoproteins C1/C2 OS=Homo sapiens GN=HNRNPC PE=1 SV=4	MESEGGADDSAEEGDLLDDDDNEDRGDDQLELIKDDEK	Phospho (ST)	79.966331@S:10	4276.67	1070.17	4276.68	1070.18	-0.0064	4	64.4	8.4	Elution from: 61.901 to 61.901 scan no 5821 cid35.00 polarity:+:MA10	61.901	2	26	K	E
HNRPC_HUMAN	Heterogeneous nuclear ribonucleoproteins C1/C2 OS=Homo sapiens GN=HNRNPC PE=1 SV=4	MESEGGADDSAEEGDLLDDDDNEDRGDDQLELIKDDEK	Label:13C(6)15N(4) (R);2 Label:2H(4) (K);Phospho (ST)	10.008269@R:25,4.025107@K:34,4.025107@K:38,79.966331@S:10	4294.74	1432.59	4294.73	1432.59	0.0033	3	60.5	22.3	Elution from: 61.938 to 61.938 scan no 5701 cid35.00 polarity:+:MA10	61.938	2	26	K	E
HNRPC_HUMAN	Heterogeneous nuclear ribonucleoproteins C1/C2 OS=Homo sapiens GN=HNRNPC PE=1 SV=4	MESEGGADDSAEEGDLLDDDDNEDRGDDQLELIKDDEK	2 Phospho (ST)	79.966331@S:3,79.966331@S:10	4356.64	1090.17	4356.64	1090.17	-0.0053	4	39.4	29.3	Elution from: 64.646 to 64.646 scan no 6116 cid35.00 polarity:+:MA10	64.646	2	25	K	E
HNRPC_HUMAN	Heterogeneous nuclear ribonucleoproteins C1/C2 OS=Homo sapiens GN=HNRNPC PE=1 SV=4	QAVEMKNDKSEEEQSSSSVK	3 Label:2H(4) (K);Oxidation (M);Phospho (ST)	4.025107@K:6,4.025107@K:9,4.025107@K:20,15.994915@M:5,79.966331@S:10	2347.07	783.362	2347.06	783.362	0.0011	3	32.7	12.6	Elution from: 25.243 to 25.243 scan no 1535 cid35.00 polarity:+:MA10:m1s	25.243	2	26	K	K
HNRPD_HUMAN	Heterogeneous nuclear ribonucleoprotein D0 OS=Homo sapiens GN=HNRNPD PE=1 SV=1	IDASKNEEDEGHSNSSPR	Phospho (ST)	79.966331@S:13	2050.82	684.615	2050.82	684.615	0.0015	3	47.3	2.2	Elution from: 25.181 to 25.181 scan no 1529 cid35.00 polarity:+:MA10:m1s	25.181	1	26	K	H
HNRPD_HUMAN	Heterogeneous nuclear ribonucleoprotein D0 OS=Homo sapiens GN=HNRNPD PE=1 SV=1	IDASKNEEDEGHSNSSPR	Phospho (ST)	79.966331@S:15	2050.82	684.615	2050.82	684.615	0.0007	3	45.9	6.1	Elution from: 25.306 to 25.306 scan no 1473 cid35.00 polarity:+:MA10	25.306	1	25	K	H
HNRPD_HUMAN	Heterogeneous nuclear ribonucleoprotein D0 OS=Homo sapiens GN=HNRNPD PE=1 SV=1	IDASKNEEDEGHSNSSPR	Label:13C(6)15N(4) (R);Label:2H(4) (K);Phospho (ST)	10.008269@R:18,4.025107@K:5,79.966331@S:16	2064.86	689.293	2064.86	689.293	0.0007	3	39	1	Elution from: 25.352 to 25.352 scan no 1489 cid35.00 polarity:+:MA10:m1s	25.352	1	26	K	H
HNRPD_HUMAN	Heterogeneous nuclear ribonucleoprotein D0 OS=Homo sapiens GN=HNRNPD PE=1 SV=1	NEEDEGHSNSSPR	Phospho (ST)	79.966331@S:10	1536.55	513.19	1536.55	513.19	-0.0002	3	20	1	Elution from: 22.281 to 22.281 scan no 1142 cid35.00 polarity:+:MA10	22.281	0	26	K	H
HNRPK_HUMAN	Heterogeneous nuclear ribonucleoprotein K OS=Homo sapiens GN=HNRNPK PE=1 SV=1	DYDDMSPR	Oxidation (M);Phospho (ST)	15.994915@M:5,79.966331@S:6	1093.34	547.679	1093.34	547.678	0.0006	2	30.6	30.6	Elution from: 28.048 to 28.048 scan no 1905 cid35.00 polarity:+:MA10	28.048	0	26	R	R
HNRPK_HUMAN	Heterogeneous nuclear ribonucleoprotein K OS=Homo sapiens GN=HNRNPK PE=1 SV=1	DYDDMSPR	Label:13C(6)15N(4) (R);Phospho (ST)	10.008269@R:8,79.966331@S:6	1087.36	544.685	1087.36	544.685	0.0001	2	30.4	30.4	Elution from: 36.678 to 36.678 scan no 2999 cid35.00 polarity:+:MA10	36.678	0	26	R	R
HNRPK_HUMAN	Heterogeneous nuclear ribonucleoprotein K OS=Homo sapiens GN=HNRNPK PE=1 SV=1	DYDDMSPR	Phospho (ST)	79.966331@S:6	1077.35	539.681	1077.35	539.681	0.0002	2	27.1	27.1	Elution from: 36.552 to 36.552 scan no 3140 cid35.00 polarity:+:MA10	36.552	0	26	R	R
HNRPK_HUMAN	Heterogeneous nuclear ribonucleoprotein K OS=Homo sapiens GN=HNRNPK PE=1 SV=1	DYDDMSPR	Label:13C(6)15N(4) (R);Oxidation (M);Phospho (ST)	10.008269@R:8,15.994915@M:5,79.966331@S:6	1103.35	552.683	1103.35	552.683	0.0005	2	26.5	26.5	Elution from: 28.064 to 28.064 scan no 1835 cid35.00 polarity:+:MA10	28.064	0	25	R	R
HP1B3_HUMAN	Heterochromatin protein 1-binding protein 3 OS=Homo sapiens GN=HP1BP3 PE=1 SV=1	KEPDDSRDEDEDEDESSEEDSEDEEPPPK	3 Phospho (ST)	79.966331@S:16,79.966331@S:17,79.966331@S:21	3617.19	1206.74	3617.18	1206.73	0.0046	3	67.2	34.8	Elution from: 33.557 to 33.557 scan no 2689 cid35.00 polarity:+:MA10:m1s	33.557	2	26	K	R
HP1B3_HUMAN	Heterochromatin protein 1-binding protein 3 OS=Homo sapiens GN=HP1BP3 PE=1 SV=1	KEPDDSRDEDEDEDESSEEDSEDEEPPPK	Label:13C(6)15N(4) (R);2 Label:2H(4) (K);3 Phospho (ST)	10.008269@R:7,4.025107@K:1,4.025107@K:29,79.966331@S:16,79.966331@S:17,79.966331@S:21	3635.24	1212.75	3635.24	1212.75	0.0022	3	50.1	30.1	Elution from: 34.482 to 34.482 scan no 2689 cid35.00 polarity:+:MA10:m1s	34.482	2	26	K	R
HP1B3_HUMAN	Heterochromatin protein 1-binding protein 3 OS=Homo sapiens GN=HP1BP3 PE=1 SV=1	KEPDDSRDEDEDEDESSEEDSEDEEPPPK	Label:13C(6)15N(4) (R);2 Label:2H(4) (K);3 Phospho (ST)	10.008269@R:7,4.025107@K:1,4.025107@K:29,79.966331@S:6,79.966331@S:16,79.966331@S:21	3635.24	909.818	3635.24	909.817	0.0026	4	35.2	10.3	Elution from: 34.412 to 34.412 scan no 2680 cid35.00 polarity:+:MA10:m1s	34.412	2	25	K	R
HS105_HUMAN	Heat shock protein 105 kDa OS=Homo sapiens GN=HSPH1 PE=1 SV=1	IESPKLER	Phospho (ST)	79.966331@S:3	1050.51	351.178	1050.51	351.178	0.0002	3	39.8	28.6	Elution from: 32.451 to 32.451 scan no 2415 cid35.00 polarity:+:MA10	32.451	1	26	K	T
HS105_HUMAN	Heat shock protein 105 kDa OS=Homo sapiens GN=HSPH1 PE=1 SV=1	IESPKLER	Label:13C(6)15N(4) (R);Label:2H(4) (K);Phospho (ST)	10.008269@R:8,4.025107@K:5,79.966331@S:3	1064.54	355.856	1064.54	355.855	0.0001	3	33.6	25.3	Elution from: 33.136 to 33.136 scan no 2554 cid35.00 polarity:+:MA10	33.136	1	25	K	T
HS90A_HUMAN	Heat shock protein HSP 90-alpha OS=Homo sapiens GN=HSP90AA1 PE=1 SV=5	ESEDKPEIEDVGSDEEEEK	Phospho (ST)	79.966331@S:13	2271.88	1136.95	2271.88	1136.95	0.0037	2	76.5	33.7	Elution from: 41.682 to 41.682 scan no 3700 cid35.00 polarity:+:MA10:m1s	41.682	0	26	K	K
HS90A_HUMAN	Heat shock protein HSP 90-alpha OS=Homo sapiens GN=HSP90AA1 PE=1 SV=5	EVSDDEAEEKEDKEEEK	Phospho (ST)	79.966331@S:3	2116.82	1059.42	2116.82	1059.42	0.0019	2	72.5	62.1	Elution from: 27.164 to 27.164 scan no 1718 cid35.00 polarity:+:MA10	27.164	2	25	K	E
HS90A_HUMAN	Heat shock protein HSP 90-alpha OS=Homo sapiens GN=HSP90AA1 PE=1 SV=5	EVSDDEAEEKEDKEEEK	3 Label:2H(4) (K);Phospho (ST)	4.025107@K:10,4.025107@K:13,4.025107@K:17,79.966331@S:3	2128.9	1065.46	2128.9	1065.46	0.0013	2	72.5	64.7	Elution from: 27.261 to 27.261 scan no 1740 cid35.00 polarity:+:MA10:m1s	27.261	2	26	K	E
HS90A_HUMAN	Heat shock protein HSP 90-alpha OS=Homo sapiens GN=HSP90AA1 PE=1 SV=5	ESEDKPEIEDVGSDEEEEKK	3 Label:2H(4) (K);Phospho (ST)	4.025107@K:5,4.025107@K:19,4.025107@K:20,79.966331@S:13	2412.05	1207.03	2412.05	1207.03	0.0022	2	67.5	27.6	Elution from: 38.170 to 38.170 scan no 3232 cid35.00 polarity:+:MA10:m1s	38.17	1	26	K	D
HS90A_HUMAN	Heat shock protein HSP 90-alpha OS=Homo sapiens GN=HSP90AA1 PE=1 SV=5	ESEDKPEIEDVGSDEEEEK	2 Label:2H(4) (K);Phospho (ST)	4.025107@K:5,4.025107@K:19,79.966331@S:13	2279.93	1140.97	2279.93	1140.97	0.003	2	67.5	6.7	Elution from: 41.176 to 41.176 scan no 3754 cid35.00 polarity:+:MA10:m1s	41.176	0	26	K	K
HS90A_HUMAN	Heat shock protein HSP 90-alpha OS=Homo sapiens GN=HSP90AA1 PE=1 SV=5	ESEDKPEIEDVGSDEEEEKK	Phospho (ST)	79.966331@S:13	2399.98	1201	2399.97	1200.99	0.0024	2	60.4	27.7	Elution from: 38.185 to 38.185 scan no 3213 cid35.00 polarity:+:MA10:m1s	38.185	1	26	K	D
HS90A_HUMAN	Heat shock protein HSP 90-alpha OS=Homo sapiens GN=HSP90AA1 PE=1 SV=5	ESEDKPEIEDVGSDEEEEKKDGDK	Phospho (ST)	79.966331@S:13	2815.15	939.39	2815.14	939.389	0.0029	3	53.5	39.4	Elution from: 37.033 to 37.033 scan no 3045 cid35.00 polarity:+:MA10:m1s	37.033	2	25	K	K
HS90A_HUMAN	Heat shock protein HSP 90-alpha OS=Homo sapiens GN=HSP90AA1 PE=1 SV=5	ESEDKPEIEDVGSDEEEEKK	3 Label:2H(4) (K);Phospho (ST)	4.025107@K:5,4.025107@K:19,4.025107@K:20,79.966331@S:2	2412.05	604.02	2412.05	604.02	0.0002	4	53.2	38.8	Elution from: 38.462 to 38.462 scan no 3384 cid35.00 polarity:+:MA10:m1s	38.462	1	25	K	D
HS90A_HUMAN	Heat shock protein HSP 90-alpha OS=Homo sapiens GN=HSP90AA1 PE=1 SV=5	ERDKEVSDDEAEEK	Label:13C(6)15N(4) (R);2 Label:2H(4) (K);Phospho (ST)	10.008269@R:2,4.025107@K:4,4.025107@K:14,79.966331@S:7	1775.76	592.927	1775.76	592.927	0.0005	3	53.1	41.6	Elution from: 25.158 to 25.158 scan no 1466 cid35.00 polarity:+:MA10	25.158	2	26	K	E
HS90A_HUMAN	Heat shock protein HSP 90-alpha OS=Homo sapiens GN=HSP90AA1 PE=1 SV=5	ESEDKPEIEDVGSDEEEEKKDGDK	4 Label:2H(4) (K);Phospho (ST)	4.025107@K:5,4.025107@K:19,4.025107@K:20,4.025107@K:24,79.966331@S:13	2831.24	944.755	2831.24	944.756	-0.0003	3	46.2	28.4	Elution from: 37.353 to 37.353 scan no 3141 cid35.00 polarity:+:MA10:m1s	37.353	2	25	K	K
HS90A_HUMAN	Heat shock protein HSP 90-alpha OS=Homo sapiens GN=HSP90AA1 PE=1 SV=5	ESEDKPEIEDVGSDEEEEKK	Phospho (ST)	79.966331@S:2	2399.98	601.001	2399.97	601.001	0.0021	4	39.8	23.4	Elution from: 38.075 to 38.075 scan no 3310 cid35.00 polarity:+:MA10:m1s	38.075	1	26	K	D
HS90A_HUMAN	Heat shock protein HSP 90-alpha OS=Homo sapiens GN=HSP90AA1 PE=1 SV=5	ESEDKPEIEDVGSDEEEEKKDGDK	4 Label:2H(4) (K);Phospho (ST)	4.025107@K:5,4.025107@K:19,4.025107@K:20,4.025107@K:24,79.966331@S:2	2831.24	708.818	2831.24	708.818	0.0001	4	37.5	24.4	Elution from: 37.227 to 37.227 scan no 3119 cid35.00 polarity:+:MA10:m1s	37.227	2	25	K	K
HS90A_HUMAN	Heat shock protein HSP 90-alpha OS=Homo sapiens GN=HSP90AA1 PE=1 SV=5	ESEDKPEIEDVGSDEEEEKKDGDK	Phospho (ST)	79.966331@S:2	2815.15	704.794	2815.14	704.793	0.0029	4	34	24.4	Elution from: 37.386 to 37.386 scan no 3145 cid35.00 polarity:+:MA10:m1s	37.386	2	25	K	K
HS90A_HUMAN	Heat shock protein HSP 90-alpha OS=Homo sapiens GN=HSP90AA1 PE=1 SV=5	ESEDKPEIEDVGSDEEEEK	2 Label:2H(4) (K);Phospho (ST)	4.025107@K:5,4.025107@K:19,79.966331@S:2	2279.93	760.985	2279.93	760.984	0.0024	3	32.8	7.7	Elution from: 41.542 to 41.542 scan no 3696 cid35.00 polarity:+:MA10:m1s	41.542	0	25	K	K
HS90A_HUMAN	Heat shock protein HSP 90-alpha OS=Homo sapiens GN=HSP90AA1 PE=1 SV=5	EKEEKESEDKPEIEDVGSDEEEEK	4 Label:2H(4) (K);Phospho (ST)	4.025107@K:2,4.025107@K:5,4.025107@K:10,4.025107@K:24,79.966331@S:18	2931.3	733.832	2931.3	733.832	0.0002	4	32.1	17.8	Elution from: 36.592 to 36.592 scan no 3127 cid35.00 polarity:+:MA10:m1s	36.592	2	26	K	K
HS90A_HUMAN	Heat shock protein HSP 90-alpha OS=Homo sapiens GN=HSP90AA1 PE=1 SV=5	ERDKEVSDDEAEEK	Phospho (ST)	79.966331@S:7	1757.7	586.907	1757.7	586.907	0.0005	3	27.3	22.3	Elution from: 25.166 to 25.166 scan no 1467 cid35.00 polarity:+:MA10	25.166	2	26	K	E
HS90B_HUMAN	Heat shock protein HSP 90-beta OS=Homo sapiens GN=HSP90AB1 PE=1 SV=4	IEDVGSDEEDDSGKDK	Phospho (ST)	79.966331@S:6	1816.69	909.351	1816.69	909.352	-0.0004	2	106.2	30.1	Elution from: 30.622 to 30.622 scan no 2162 cid35.00 polarity:+:MA10	30.622	1	25	K	K
HS90B_HUMAN	Heat shock protein HSP 90-beta OS=Homo sapiens GN=HSP90AB1 PE=1 SV=4	IEDVGSDEEDDSGKDK	2 Label:2H(4) (K);Phospho (ST)	4.025107@K:14,4.025107@K:16,79.966331@S:6	1824.74	913.378	1824.74	913.377	0.0015	2	97.7	34.4	Elution from: 30.686 to 30.686 scan no 2180 cid35.00 polarity:+:MA10	30.686	1	26	K	K
HS90B_HUMAN	Heat shock protein HSP 90-beta OS=Homo sapiens GN=HSP90AB1 PE=1 SV=4	IEDVGSDEEDDSGK	Label:2H(4) (K);Phospho (ST)	4.025107@K:14,79.966331@S:6	1577.59	789.804	1577.59	789.803	0.0009	2	76.1	43.3	Elution from: 33.122 to 33.122 scan no 2646 cid35.00 polarity:+:MA10	33.122	0	26	K	D
HS90B_HUMAN	Heat shock protein HSP 90-beta OS=Homo sapiens GN=HSP90AB1 PE=1 SV=4	IEDVGSDEEDDSGK	Phospho (ST)	79.966331@S:6	1573.57	787.791	1573.57	787.791	0.0012	2	75.9	38.1	Elution from: 33.295 to 33.295 scan no 2532 cid35.00 polarity:+:MA10	33.295	0	26	K	D
HS90B_HUMAN	Heat shock protein HSP 90-beta OS=Homo sapiens GN=HSP90AB1 PE=1 SV=4	IEDVGSDEEDDSGKDKK	3 Label:2H(4) (K);Phospho (ST)	4.025107@K:14,4.025107@K:16,4.025107@K:17,79.966331@S:6	1956.86	653.294	1956.86	653.294	0.0011	3	44.5	29.6	Elution from: 27.869 to 27.869 scan no 1918 cid35.00 polarity:+:MA10	27.869	2	26	K	K
HS90B_HUMAN	Heat shock protein HSP 90-beta OS=Homo sapiens GN=HSP90AB1 PE=1 SV=4	EISDDEAEEEKGEK	Phospho (ST)	79.966331@S:3	1686.65	844.333	1686.65	844.333	0.0014	2	31.3	24.4	Elution from: 29.915 to 29.915 scan no 2078 cid35.00 polarity:+:MA10	29.915	1	25	K	E
HS90B_HUMAN	Heat shock protein HSP 90-beta OS=Homo sapiens GN=HSP90AB1 PE=1 SV=4	EEEDKDDEEKPKIEDVGSDEEDDSGK	Phospho (ST)	79.966331@S:18	3045.2	762.308	3045.2	762.307	0.004	4	29.9	14.7	Elution from: 36.897 to 36.897 scan no 3024 cid35.00 polarity:+:MA10:m1s	36.897	2	25	K	D
HSF1_HUMAN	Heat shock factor protein 1 OS=Homo sapiens GN=HSF1 PE=1 SV=1	GHTDTEGRPPSPPPTSTPEK	2 Phospho (ST)	79.966331@S:11,79.966332@T:15	2246.93	749.983	2246.92	749.982	0.0015	3	35.8	3.2	Elution from: 30.878 to 30.878 scan no 2302 cid35.00 polarity:+:MA10:m1s	30.878	0	26	R	C
HSF1_HUMAN	Heat shock factor protein 1 OS=Homo sapiens GN=HSF1 PE=1 SV=1	GHTDTEGRPPSPPPTSTPEK	2 Phospho (ST)	79.966332@T:15,79.966332@T:17	2246.93	749.982	2246.92	749.982	0.0006	3	33	4.5	Elution from: 30.975 to 30.975 scan no 2210 cid35.00 polarity:+:MA10:m1s	30.975	0	25	R	C
HSP71_HUMAN	Heat shock 70 kDa protein 1A/1B OS=Homo sapiens GN=HSPA1A PE=1 SV=5	GGSGSGPTIEEVD	Phospho (ST)	79.966331@S:3	1283.49	642.753	1283.49	642.753	0.0004	2	41.2	5.5	Elution from: 47.231 to 47.231 scan no 4339 cid35.00 polarity:+:MA10	47.231	0	26	K	-
HSPB1_HUMAN	Heat shock protein beta-1 OS=Homo sapiens GN=HSPB1 PE=1 SV=2	QLSSGVSEIR	Label:13C(6)15N(4) (R);Phospho (ST)	10.008269@R:10,79.966331@S:3	1164.54	583.278	1164.54	583.278	0.0006	2	68.9	15.2	Elution from: 42.415 to 42.415 scan no 3916 cid35.00 polarity:+:MA10	42.415	0	26	R	H
HSPB1_HUMAN	Heat shock protein beta-1 OS=Homo sapiens GN=HSPB1 PE=1 SV=2	QLSSGVSEIR	Phospho (ST)	79.966331@S:3	1154.53	578.274	1154.53	578.274	0.0004	2	63.7	21.1	Elution from: 42.881 to 42.881 scan no 3800 cid35.00 polarity:+:MA10	42.881	0	25	R	H
HSPB1_HUMAN	Heat shock protein beta-1 OS=Homo sapiens GN=HSPB1 PE=1 SV=2	QLSSGVSEIR	Label:13C(6)15N(4) (R);Phospho (ST)	10.008269@R:10,79.966331@S:4	1164.54	583.279	1164.54	583.278	0.0009	2	50	0	Elution from: 43.254 to 43.254 scan no 3884 cid35.00 polarity:+:MA10	43.254	0	26	R	H
HSPB1_HUMAN	Heat shock protein beta-1 OS=Homo sapiens GN=HSPB1 PE=1 SV=2	QLSSGVSEIR	Phospho (ST)	79.966331@S:4	1154.53	578.274	1154.53	578.274	0.0003	2	32.3	0.1	Elution from: 43.285 to 43.285 scan no 3857 cid35.00 polarity:+:MA10	43.285	0	26	R	H
HSPB7_HUMAN	Heat shock protein beta-7 OS=Homo sapiens GN=HSPB7 PE=1 SV=1	MSHRTSSTFRAER	Label:13C(6)15N(4) (R);3 Phospho (ST)	10.008269@R:13,79.966331@S:2,79.966332@T:5,79.966332@T:8	1814.66	454.672	1814.66	454.672	-0.0009	4	27.9	8.4	Elution from: 21.853 to 21.853 scan no 1098 cid35.00 polarity:+:MA10	21.853	2	26	-	S
HTSF1_HUMAN	HIV Tat-specific factor 1 OS=Homo sapiens GN=HTATSF1 PE=1 SV=1	LFEESDDKEDEDADGKEVEDADEK	3 Label:2H(4) (K);Phospho (ST)	4.025107@K:8,4.025107@K:16,4.025107@K:24,79.966331@S:5	2848.17	950.399	2848.17	950.398	0.0024	3	96.5	85.3	Elution from: 44.476 to 44.476 scan no 4141 cid35.00 polarity:+:MA10:m1s	44.476	2	26	K	L
HTSF1_HUMAN	HIV Tat-specific factor 1 OS=Homo sapiens GN=HTATSF1 PE=1 SV=1	VFDDESDEKEDEEYADEK	Phospho (ST)	79.966331@S:6	2270.83	1136.42	2270.83	1136.42	0.0026	2	90.5	67.7	Elution from: 44.108 to 44.108 scan no 4064 cid35.00 polarity:+:MA10:m1s	44.108	1	26	K	G
HTSF1_HUMAN	HIV Tat-specific factor 1 OS=Homo sapiens GN=HTATSF1 PE=1 SV=1	LFEESDDKEDEDADGKEVEDADEK	Phospho (ST)	79.966331@S:5	2836.1	946.374	2836.1	946.373	0.0024	3	86.8	64.3	Elution from: 44.856 to 44.856 scan no 4026 cid35.00 polarity:+:MA10:m1s	44.856	2	26	K	L
HTSF1_HUMAN	HIV Tat-specific factor 1 OS=Homo sapiens GN=HTATSF1 PE=1 SV=1	VFDDESDEKEDEEYADEK	2 Label:2H(4) (K);Phospho (ST)	4.025107@K:9,4.025107@K:18,79.966331@S:6	2278.88	1140.45	2278.88	1140.45	0.0018	2	80.5	67	Elution from: 44.303 to 44.303 scan no 4023 cid35.00 polarity:+:MA10:m1s	44.303	1	25	K	G
HTSF1_HUMAN	HIV Tat-specific factor 1 OS=Homo sapiens GN=HTATSF1 PE=1 SV=1	ESEEGNPVRGSEEDSPKK	Label:13C(6)15N(4) (R);2 Label:2H(4) (K);Phospho (ST)	10.008269@R:9,4.025107@K:17,4.025107@K:18,79.966331@S:15	2070.92	691.314	2070.92	691.315	-0.0004	3	61.6	39.4	Elution from: 26.631 to 26.631 scan no 1647 cid35.00 polarity:+:MA10	26.631	2	25	K	E
HTSF1_HUMAN	HIV Tat-specific factor 1 OS=Homo sapiens GN=HTATSF1 PE=1 SV=1	ELEENDSENSEFEDDGSEK	3 Phospho (ST)	79.966331@S:7,79.966331@S:10,79.966331@S:17	2440.74	1221.38	2440.74	1221.38	0.0034	2	56.5	53.6	Elution from: 45.893 to 45.893 scan no 4308 cid35.00 polarity:+:MA10:m1s	45.893	0	26	K	V
HTSF1_HUMAN	HIV Tat-specific factor 1 OS=Homo sapiens GN=HTATSF1 PE=1 SV=1	ESEEGNPVRGSEEDSPKK	Phospho (ST)	79.966331@S:15	2052.86	685.295	2052.86	685.295	-0.0001	3	54.6	30.4	Elution from: 26.569 to 26.569 scan no 1706 cid35.00 polarity:+:MA10:m1s	26.569	2	26	K	E
HTSF1_HUMAN	HIV Tat-specific factor 1 OS=Homo sapiens GN=HTATSF1 PE=1 SV=1	LFEDDDSNEK	Phospho (ST)	79.966331@S:7	1290.47	646.24	1290.47	646.24	0.0005	2	53.3	42	Elution from: 38.338 to 38.338 scan no 3223 cid35.00 polarity:+:MA10	38.338	0	25	K	L
HTSF1_HUMAN	HIV Tat-specific factor 1 OS=Homo sapiens GN=HTATSF1 PE=1 SV=1	LFDEEEDSSEKLFDDSDER	Label:13C(6)15N(4) (R);Label:2H(4) (K);2 Phospho (ST)	10.008269@R:19,4.025107@K:11,79.966331@S:8,79.966331@S:9	2477.92	826.981	2477.92	826.981	0.0005	3	46.4	35.1	Elution from: 62.572 to 62.572 scan no 5848 cid35.00 polarity:+:MA10:m1s	62.572	1	26	K	G
HTSF1_HUMAN	HIV Tat-specific factor 1 OS=Homo sapiens GN=HTATSF1 PE=1 SV=1	ELEENDSENSEFEDDGSEK	Label:2H(4) (K);3 Phospho (ST)	4.025107@K:19,79.966331@S:7,79.966331@S:10,79.966331@S:17	2444.77	1223.39	2444.76	1223.39	0.0017	2	45.9	45.9	Elution from: 46.279 to 46.279 scan no 4243 cid35.00 polarity:+:MA10:m1s	46.279	0	25	K	V
HTSF1_HUMAN	HIV Tat-specific factor 1 OS=Homo sapiens GN=HTATSF1 PE=1 SV=1	DLDEEGSEKELHENVLDK	Phospho (ST)	79.966331@S:7	2177.94	726.987	2177.94	726.986	0.0029	3	45.6	31.3	Elution from: 46.589 to 46.589 scan no 4416 cid35.00 polarity:+:MA10:m1s	46.589	1	26	K	E
HTSF1_HUMAN	HIV Tat-specific factor 1 OS=Homo sapiens GN=HTATSF1 PE=1 SV=1	LFDEEEDSSEK	Phospho (ST)	79.966331@S:8	1406.51	704.264	1406.51	704.264	0.0018	2	45.3	10	Elution from: 41.755 to 41.755 scan no 3673 cid35.00 polarity:+:MA10	41.755	0	26	K	L
HTSF1_HUMAN	HIV Tat-specific factor 1 OS=Homo sapiens GN=HTATSF1 PE=1 SV=1	LFEDDDSNEK	Label:2H(4) (K);Phospho (ST)	4.025107@K:10,79.966331@S:7	1294.49	648.253	1294.49	648.252	0.0007	2	41.2	35.8	Elution from: 38.503 to 38.503 scan no 3390 cid35.00 polarity:+:MA10	38.503	0	25	K	L
HTSF1_HUMAN	HIV Tat-specific factor 1 OS=Homo sapiens GN=HTATSF1 PE=1 SV=1	LFEESDDKEDEDADGK	Phospho (ST)	79.966331@S:5	1920.72	641.246	1920.71	641.246	0.0025	3	37.5	30.4	Elution from: 39.695 to 39.695 scan no 3410 cid35.00 polarity:+:MA10:m1s	39.695	1	26	K	E
HTSF1_HUMAN	HIV Tat-specific factor 1 OS=Homo sapiens GN=HTATSF1 PE=1 SV=1	LFEDDDSNEKLFDEEEDSSEK	2 Phospho (ST)	79.966331@S:7,79.966331@S:19	2678.97	893.997	2678.97	893.996	0.0011	3	37.5	0	Elution from: 62.154 to 62.154 scan no 5932 cid35.00 polarity:+:MA10:m1s	62.154	1	26	K	L
HTSF1_HUMAN	HIV Tat-specific factor 1 OS=Homo sapiens GN=HTATSF1 PE=1 SV=1	ESSPEKEAEEGCPEK	Carbamidomethyl (C);Phospho (ST)	57.021465@C:12,79.966331@S:3	1784.68	893.349	1784.68	893.348	0.0018	2	37.3	2	Elution from: 31.138 to 31.138 scan no 2338 cid35.00 polarity:+:MA10	31.138	1	26	K	E
HTSF1_HUMAN	HIV Tat-specific factor 1 OS=Homo sapiens GN=HTATSF1 PE=1 SV=1	LFDEEEDSSEKLFDDSDER	2 Phospho (ST)	79.966331@S:8,79.966331@S:9	2463.89	822.304	2463.89	822.303	0.0028	3	36.7	33.7	Elution from: 62.246 to 62.246 scan no 5943 cid35.00 polarity:+:MA10:m1s	62.246	1	26	K	G
HTSF1_HUMAN	HIV Tat-specific factor 1 OS=Homo sapiens GN=HTATSF1 PE=1 SV=1	ESEEGNPVRGSEEDSPKK	2 Phospho (ST)	79.966331@S:11,79.966331@S:15	2132.83	711.951	2132.83	711.951	0.0014	3	29.6	14.7	Elution from: 27.632 to 27.632 scan no 1860 cid35.00 polarity:+:MA10:m1s	27.632	2	26	K	E
HTSF1_HUMAN	HIV Tat-specific factor 1 OS=Homo sapiens GN=HTATSF1 PE=1 SV=1	LFEESDDKEDEDADGK	2 Label:2H(4) (K);Phospho (ST)	4.025107@K:8,4.025107@K:16,79.966331@S:5	1928.77	643.93	1928.77	643.929	0.0024	3	26.7	22.3	Elution from: 39.950 to 39.950 scan no 3575 cid35.00 polarity:+:MA10:m1s	39.95	1	25	K	E
HUWE1_HUMAN	E3 ubiquitin-protein ligase HUWE1 OS=Homo sapiens GN=HUWE1 PE=1 SV=3	GSGTASDDEFENLR	Label:13C(6)15N(4) (R);Phospho (ST)	10.008269@R:14,79.966331@S:6	1586.61	794.314	1586.61	794.314	0.0012	2	48.2	8.6	Elution from: 50.716 to 50.716 scan no 4732 cid35.00 polarity:+:MA10	50.716	0	26	R	I
HUWE1_HUMAN	E3 ubiquitin-protein ligase HUWE1 OS=Homo sapiens GN=HUWE1 PE=1 SV=3	GSGTASDDEFENLR	Phospho (ST)	79.966331@S:6	1576.61	789.31	1576.6	789.309	0.0015	2	29.3	13.6	Elution from: 50.797 to 50.797 scan no 4744 cid35.00 polarity:+:MA10	50.797	0	26	R	I
I2BP2_HUMAN	Interferon regulatory factor 2-binding protein 2 OS=Homo sapiens GN=IRF2BP2 PE=1 SV=2	RPASVSSSAAVEHEQR	Phospho (ST)	79.966331@S:4	1789.81	597.611	1789.81	597.611	-0.0003	3	59.2	5.2	Elution from: 28.476 to 28.476 scan no 1893 cid35.00 polarity:+:MA10:m1s	28.476	0	25	K	E
I2BP2_HUMAN	Interferon regulatory factor 2-binding protein 2 OS=Homo sapiens GN=IRF2BP2 PE=1 SV=2	RKPSPEPEGEVGPPK	Phospho (ST)	79.966331@S:4	1682.8	561.942	1682.8	561.942	0.0015	3	48.9	30.7	Elution from: 29.493 to 29.493 scan no 2022 cid35.00 polarity:+:MA10	29.493	1	25	K	I
I2BP2_HUMAN	Interferon regulatory factor 2-binding protein 2 OS=Homo sapiens GN=IRF2BP2 PE=1 SV=2	LEEPPELNRQSPNPR	Phospho (ST)	79.966331@S:11	1854.86	619.295	1854.86	619.295	0.0006	3	29.9	18.6	Elution from: 41.985 to 41.985 scan no 3686 cid35.00 polarity:+:MA10:m1s	41.985	1	25	K	R
I2BPL_HUMAN	Interferon regulatory factor 2-binding protein-like OS=Homo sapiens GN=IRF2BPL PE=1 SV=1	RKASPEPPDSAEGALK	Phospho (ST)	79.966331@S:4	1731.82	578.28	1731.82	578.28	0.0002	3	36.7	22.5	Elution from: 32.474 to 32.474 scan no 2418 cid35.00 polarity:+:MA10	32.474	2	26	K	L
ICAL_HUMAN	Calpastatin OS=Homo sapiens GN=CAST PE=1 SV=4	SESELIDELSEDFDRSECK	Carbamidomethyl (C);Phospho (ST)	57.021465@C:18,79.966331@S:3	2366.95	789.99	2366.95	789.989	0.0008	3	70.7	12.7	Elution from: 79.421 to 79.421 scan no 7211 cid35.00 polarity:+:MA10:m1s	79.421	1	26	R	E
ICAL_HUMAN	Calpastatin OS=Homo sapiens GN=CAST PE=1 SV=4	DLDDALDKLSDSLGQR	Phospho (ST)	79.966331@S:10	1839.82	614.282	1839.83	614.282	-0.0002	3	55.7	9.3	Elution from: 65.167 to 65.167 scan no 6080 cid35.00 polarity:+:MA10	65.167	1	26	K	Q
ICLN_HUMAN	Methylosome subunit pICln OS=Homo sapiens GN=CLNS1A PE=1 SV=1	FEEESKEPVADEEEEDSDDDVEPITEFR	Phospho (ST)	79.966331@S:17	3393.35	1132.12	3393.35	1132.12	0.004	3	83.8	25.6	Elution from: 60.488 to 60.488 scan no 5703 cid35.00 polarity:+:MA10:m1s	60.488	1	26	K	F
ICLN_HUMAN	Methylosome subunit pICln OS=Homo sapiens GN=CLNS1A PE=1 SV=1	FEEESKEPVADEEEEDSDDDVEPITEFR	Label:13C(6)15N(4) (R);Label:2H(4) (K);Phospho (ST)	10.008269@R:28,4.025107@K:6,79.966331@S:17	3407.38	1136.8	3407.38	1136.8	0.0044	3	78.5	43.8	Elution from: 60.201 to 60.201 scan no 5760 cid35.00 polarity:+:MA10:m1s	60.201	1	26	K	F
ICLN_HUMAN	Methylosome subunit pICln OS=Homo sapiens GN=CLNS1A PE=1 SV=1	EPVADEEEEDSDDDVEPITEFR	Phospho (ST)	79.966331@S:11	2644.03	1323.02	2644.02	1323.02	0.0026	2	45.4	37.8	Elution from: 62.727 to 62.727 scan no 5864 cid35.00 polarity:+:MA10:m1s	62.727	0	26	K	F
IF16_HUMAN	Gamma-interferon-inducible protein 16 OS=Homo sapiens GN=IFI16 PE=1 SV=3	EVDATSPAPSTSSTVK	Phospho (ST)	79.966331@S:6	1655.73	828.873	1655.73	828.872	0.0018	2	57.5	10.7	Elution from: 32.594 to 32.594 scan no 2569 cid35.00 polarity:+:MA10	32.594	0	26	K	T
IF16_HUMAN	Gamma-interferon-inducible protein 16 OS=Homo sapiens GN=IFI16 PE=1 SV=3	VSEEQTQPPSPAGAGMSTAMGR	Phospho (ST)	79.966331@S:10	2267.96	756.993	2267.96	756.992	0.0016	3	31.3	11.6	Elution from: 47.965 to 47.965 scan no 4496 cid35.00 polarity:+:MA10:m1s	47.965	0	26	K	S
IF2P_HUMAN	Eukaryotic translation initiation factor 5B OS=Homo sapiens GN=EIF5B PE=1 SV=4	KWDGSEEDEDNSK	Phospho (ST)	79.966331@S:5	1617.58	809.799	1617.58	809.799	0.0006	2	95.4	63.7	Elution from: 28.764 to 28.764 scan no 1929 cid35.00 polarity:+:MA10	28.764	1	25	K	K
IF2P_HUMAN	Eukaryotic translation initiation factor 5B OS=Homo sapiens GN=EIF5B PE=1 SV=4	KWDGSEEDEDNSK	2 Label:2H(4) (K);Phospho (ST)	4.025107@K:1,4.025107@K:13,79.966331@S:5	1625.63	813.824	1625.63	813.824	0.0007	2	92.7	46.2	Elution from: 28.756 to 28.756 scan no 2033 cid35.00 polarity:+:MA10	28.756	1	26	K	K
IF2P_HUMAN	Eukaryotic translation initiation factor 5B OS=Homo sapiens GN=EIF5B PE=1 SV=4	NKPGPNIESGNEDDDASFK	2 Label:2H(4) (K);Phospho (ST)	4.025107@K:2,4.025107@K:19,79.966331@S:9	2120.92	1061.47	2120.91	1061.46	0.0022	2	78.7	52.6	Elution from: 41.167 to 41.167 scan no 3587 cid35.00 polarity:+:MA10:m1s	41.167	0	25	K	I
IF2P_HUMAN	Eukaryotic translation initiation factor 5B OS=Homo sapiens GN=EIF5B PE=1 SV=4	NKPGPNIESGNEDDDASFK	Phospho (ST)	79.966331@S:9	2112.87	1057.44	2112.86	1057.44	0.0031	2	77.6	54.3	Elution from: 40.693 to 40.693 scan no 3685 cid35.00 polarity:+:MA10:m1s	40.693	0	26	K	I
IF2P_HUMAN	Eukaryotic translation initiation factor 5B OS=Homo sapiens GN=EIF5B PE=1 SV=4	QSFDDNDSEELEDK	Phospho (ST)	79.966331@S:8	1749.63	875.821	1749.63	875.82	0.0019	2	76.3	52.4	Elution from: 44.453 to 44.453 scan no 3981 cid35.00 polarity:+:MA10	44.453	0	26	K	D
IF2P_HUMAN	Eukaryotic translation initiation factor 5B OS=Homo sapiens GN=EIF5B PE=1 SV=4	KQSFDDNDSEELEDKDSK	Phospho (ST)	79.966331@S:9	2207.88	736.966	2207.87	736.965	0.0025	3	68.1	29.6	Elution from: 35.243 to 35.243 scan no 2793 cid35.00 polarity:+:MA10:m1s	35.243	2	25	K	S
IF2P_HUMAN	Eukaryotic translation initiation factor 5B OS=Homo sapiens GN=EIF5B PE=1 SV=4	QSFDDNDSEELEDK	Label:2H(4) (K);Phospho (ST)	4.025107@K:14,79.966331@S:8	1753.65	877.833	1753.65	877.833	0.0014	2	64.9	53.5	Elution from: 44.340 to 44.340 scan no 4028 cid35.00 polarity:+:MA10	44.34	0	25	K	D
IF2P_HUMAN	Eukaryotic translation initiation factor 5B OS=Homo sapiens GN=EIF5B PE=1 SV=4	QSFDDNDSEELEDKDSK	Phospho (ST)	79.966331@S:8	2079.78	1040.9	2079.78	1040.9	0.0031	2	61.6	41.7	Elution from: 39.330 to 39.330 scan no 3497 cid35.00 polarity:+:MA10:m1s	39.33	1	26	K	S
IF2P_HUMAN	Eukaryotic translation initiation factor 5B OS=Homo sapiens GN=EIF5B PE=1 SV=4	VEMYSGSDDDDDFNK	Label:2H(4) (K);Oxidation (M);2 Phospho (ST)	4.025107@K:15,15.994915@M:3,79.966331@S:5,79.966331@S:7	1915.61	958.811	1915.6	958.81	0.0018	2	61	10.9	Elution from: 42.754 to 42.754 scan no 3832 cid35.00 polarity:+:MA10	42.754	0	26	K	L
IF2P_HUMAN	Eukaryotic translation initiation factor 5B OS=Homo sapiens GN=EIF5B PE=1 SV=4	KQSFDDNDSEELEDK	2 Label:2H(4) (K);Phospho (ST)	4.025107@K:1,4.025107@K:15,79.966331@S:9	1885.77	943.894	1885.77	943.893	0.0033	2	58	32.4	Elution from: 38.791 to 38.791 scan no 3290 cid35.00 polarity:+:MA10:m1s	38.791	1	26	K	D
IF2P_HUMAN	Eukaryotic translation initiation factor 5B OS=Homo sapiens GN=EIF5B PE=1 SV=4	KQSFDDNDSEELEDKDSK	3 Label:2H(4) (K);Phospho (ST)	4.025107@K:1,4.025107@K:15,4.025107@K:18,79.966331@S:9	2219.95	740.991	2219.95	740.99	0.0014	3	56.4	30.2	Elution from: 35.618 to 35.618 scan no 2983 cid35.00 polarity:+:MA10:m1s	35.618	2	25	K	S
IF2P_HUMAN	Eukaryotic translation initiation factor 5B OS=Homo sapiens GN=EIF5B PE=1 SV=4	KWDGSEEDEDNSKK	Phospho (ST)	79.966331@S:5	1745.68	873.846	1745.68	873.846	-0.0001	2	49.2	13.2	Elution from: 26.510 to 26.510 scan no 1708 cid35.00 polarity:+:MA10	26.51	2	26	K	I
IF2P_HUMAN	Eukaryotic translation initiation factor 5B OS=Homo sapiens GN=EIF5B PE=1 SV=4	VEMYSGSDDDDDFNK	Label:2H(4) (K);2 Phospho (ST)	4.025107@K:15,79.966331@S:5,79.966331@S:7	1899.61	950.814	1899.61	950.812	0.0042	2	48.4	6	Elution from: 51.035 to 51.035 scan no 4767 cid35.00 polarity:+:MA10:m1s	51.035	0	26	K	L
IF2P_HUMAN	Eukaryotic translation initiation factor 5B OS=Homo sapiens GN=EIF5B PE=1 SV=4	VEMYSGSDDDDDFNK	Oxidation (M);2 Phospho (ST)	15.994915@M:3,79.966331@S:5,79.966331@S:7	1911.58	956.798	1911.58	956.797	0.0017	2	47.9	9.1	Elution from: 42.542 to 42.542 scan no 3951 cid35.00 polarity:+:MA10	42.542	0	26	K	L
IF2P_HUMAN	Eukaryotic translation initiation factor 5B OS=Homo sapiens GN=EIF5B PE=1 SV=4	VEMYSGSDDDDDFNKLPK	2 Label:2H(4) (K);2 Phospho (ST)	4.025107@K:15,4.025107@K:18,79.966331@S:5,79.966331@S:7	2241.87	748.297	2241.87	748.296	0.0022	3	47.8	7.2	Elution from: 57.823 to 57.823 scan no 5550 cid35.00 polarity:+:MA10:m1s	57.823	1	26	K	K
IF2P_HUMAN	Eukaryotic translation initiation factor 5B OS=Homo sapiens GN=EIF5B PE=1 SV=4	QSFDDNDSEELEDKDSK	2 Label:2H(4) (K);Phospho (ST)	4.025107@K:14,4.025107@K:17,79.966331@S:8	2087.83	1044.92	2087.83	1044.92	0.0022	2	46.1	30.8	Elution from: 39.825 to 39.825 scan no 3428 cid35.00 polarity:+:MA10:m1s	39.825	1	26	K	S
IF2P_HUMAN	Eukaryotic translation initiation factor 5B OS=Homo sapiens GN=EIF5B PE=1 SV=4	VEMYSGSDDDDDFNK	Oxidation (M);Phospho (ST);Phospho (Y)	15.994915@M:3,79.966331@S:7,79.966331@Y:4	1911.58	956.798	1911.58	956.797	0.0015	2	45	5.9	Elution from: 42.429 to 42.429 scan no 3894 cid35.00 polarity:+:MA10	42.429	0	26	K	L
IF2P_HUMAN	Eukaryotic translation initiation factor 5B OS=Homo sapiens GN=EIF5B PE=1 SV=4	VEMYSGSDDDDDFNKLPK	Oxidation (M);Phospho (ST);Phospho (Y)	15.994915@M:3,79.966331@S:7,79.966331@Y:4	2249.81	750.945	2249.81	750.944	0.0018	3	44.6	12.3	Elution from: 52.935 to 52.935 scan no 5096 cid35.00 polarity:+:MA10:m1s	52.935	1	26	K	K
IF2P_HUMAN	Eukaryotic translation initiation factor 5B OS=Homo sapiens GN=EIF5B PE=1 SV=4	VEMYSGSDDDDDFNKLPK	2 Label:2H(4) (K);Oxidation (M);Phospho (ST);Phospho (Y)	4.025107@K:15,4.025107@K:18,15.994915@M:3,79.966331@S:7,79.966331@Y:4	2257.86	753.628	2257.86	753.628	0.0018	3	43.9	2.8	Elution from: 52.941 to 52.941 scan no 5097 cid35.00 polarity:+:MA10:m1s	52.941	1	26	K	K
IF2P_HUMAN	Eukaryotic translation initiation factor 5B OS=Homo sapiens GN=EIF5B PE=1 SV=4	VEMYSGSDDDDDFNKLPKK	3 Label:2H(4) (K);Oxidation (M);2 Phospho (ST)	4.025107@K:15,4.025107@K:18,4.025107@K:19,15.994915@M:3,79.966331@S:5,79.966331@S:7	2389.98	797.668	2389.98	797.668	0.0011	3	42.2	3.8	Elution from: 44.710 to 44.710 scan no 4169 cid35.00 polarity:+:MA10:m1s	44.71	2	26	K	A
IF2P_HUMAN	Eukaryotic translation initiation factor 5B OS=Homo sapiens GN=EIF5B PE=1 SV=4	KWDGSEEDEDNSKK	3 Label:2H(4) (K);Phospho (ST)	4.025107@K:1,4.025107@K:13,4.025107@K:14,79.966331@S:5	1757.75	586.925	1757.75	586.925	-0.0001	3	40.2	25	Elution from: 26.453 to 26.453 scan no 1700 cid35.00 polarity:+:MA10:m1s	26.453	2	26	K	I
IF2P_HUMAN	Eukaryotic translation initiation factor 5B OS=Homo sapiens GN=EIF5B PE=1 SV=4	VEMYSGSDDDDDFNKLPK	2 Phospho (ST)	79.966331@S:5,79.966331@S:7	2233.82	745.614	2233.82	745.613	0.0022	3	39.9	7.4	Elution from: 58.216 to 58.216 scan no 5405 cid35.00 polarity:+:MA10:m1s	58.216	1	26	K	K
IF2P_HUMAN	Eukaryotic translation initiation factor 5B OS=Homo sapiens GN=EIF5B PE=1 SV=4	VEMYSGSDDDDDFNKLPKK	3 Label:2H(4) (K);Oxidation (M);Phospho (ST);Phospho (Y)	4.025107@K:15,4.025107@K:18,4.025107@K:19,15.994915@M:3,79.966331@S:7,79.966331@Y:4	2389.98	797.668	2389.98	797.668	0.0005	3	39.2	3.3	Elution from: 45.018 to 45.018 scan no 4170 cid35.00 polarity:+:MA10:m1s	45.018	2	26	K	A
IF2P_HUMAN	Eukaryotic translation initiation factor 5B OS=Homo sapiens GN=EIF5B PE=1 SV=4	VEMYSGSDDDDDFNKLPK	Phospho (ST);Phospho (Y)	79.966331@S:7,79.966331@Y:4	2233.82	745.614	2233.82	745.613	0.0027	3	38.1	5.2	Elution from: 58.138 to 58.138 scan no 5432 cid35.00 polarity:+:MA10:m1s	58.138	1	25	K	K
IF2P_HUMAN	Eukaryotic translation initiation factor 5B OS=Homo sapiens GN=EIF5B PE=1 SV=4	VEMYSGSDDDDDFNKLPK	2 Label:2H(4) (K);Phospho (ST);Phospho (Y)	4.025107@K:15,4.025107@K:18,79.966331@S:7,79.966331@Y:4	2241.87	748.297	2241.87	748.296	0.0015	3	36.4	3.4	Elution from: 57.595 to 57.595 scan no 5449 cid35.00 polarity:+:MA10	57.595	1	26	K	K
IF2P_HUMAN	Eukaryotic translation initiation factor 5B OS=Homo sapiens GN=EIF5B PE=1 SV=4	VEMYSGSDDDDDFNKLPK	2 Label:2H(4) (K);Oxidation (M);2 Phospho (ST)	4.025107@K:15,4.025107@K:18,15.994915@M:3,79.966331@S:5,79.966331@S:7	2257.86	753.628	2257.86	753.628	0.0016	3	36.3	0.4	Elution from: 53.122 to 53.122 scan no 4956 cid35.00 polarity:+:MA10:m1s	53.122	1	25	K	K
IF2P_HUMAN	Eukaryotic translation initiation factor 5B OS=Homo sapiens GN=EIF5B PE=1 SV=4	KQSFDDNDSEELEDKDSK	3 Label:2H(4) (K);2 Phospho (ST)	4.025107@K:1,4.025107@K:15,4.025107@K:18,79.966331@S:3,79.966331@S:9	2299.92	767.646	2299.92	767.646	0.0019	3	33.8	26.8	Elution from: 36.586 to 36.586 scan no 3126 cid35.00 polarity:+:MA10:m1s	36.586	2	25	K	S
IF2P_HUMAN	Eukaryotic translation initiation factor 5B OS=Homo sapiens GN=EIF5B PE=1 SV=4	SRINSSGESGDESDEFLQSRK	4 Phospho (ST)	79.966331@S:1,79.966331@S:6,79.966331@S:9,79.966331@S:13	2646.93	883.317	2646.93	883.317	0.0019	3	31.2	3.2	Elution from: 48.989 to 48.989 scan no 4631 cid35.00 polarity:+:MA10:m1s	48.989	2	26	R	G
IF2P_HUMAN	Eukaryotic translation initiation factor 5B OS=Homo sapiens GN=EIF5B PE=1 SV=4	VEMYSGSDDDDDFNKLPK	Oxidation (M);2 Phospho (ST)	15.994915@M:3,79.966331@S:5,79.966331@S:7	2249.81	750.945	2249.81	750.944	0.0025	3	30.2	5.3	Elution from: 52.575 to 52.575 scan no 5002 cid35.00 polarity:+:MA10:m1s	52.575	1	26	K	K
IF2P_HUMAN	Eukaryotic translation initiation factor 5B OS=Homo sapiens GN=EIF5B PE=1 SV=4	VEMYSGSDDDDDFNKLPKK	Oxidation (M);2 Phospho (ST)	15.994915@M:3,79.966331@S:5,79.966331@S:7	2377.91	793.643	2377.91	793.643	0.0022	3	26.5	2.5	Elution from: 45.012 to 45.012 scan no 4169 cid35.00 polarity:+:MA10:m1s	45.012	2	26	K	A
IF4B_HUMAN	Eukaryotic translation initiation factor 4B OS=Homo sapiens GN=EIF4B PE=1 SV=2	YAALSVDGEDENEGEDYAE	Phospho (ST)	79.966331@S:5	2154.78	1078.4	2154.78	1078.4	0.0021	2	82.3	12.8	Elution from: 57.449 to 57.449 scan no 5489 cid35.00 polarity:+:MA10:m1s	57.449	0	25	K	-
IF4B_HUMAN	Eukaryotic translation initiation factor 4B OS=Homo sapiens GN=EIF4B PE=1 SV=2	HPSWR	Phospho (ST)	79.966331@S:3	761.301	381.658	761.301	381.658	-0.0003	2	30.5	28.2	Elution from: 28.274 to 28.274 scan no 1943 cid35.00 polarity:+:MA10	28.274	0	26	R	S
IF4B_HUMAN	Eukaryotic translation initiation factor 4B OS=Homo sapiens GN=EIF4B PE=1 SV=2	ERHPSWR	Phospho (ST)	79.966331@S:5	1046.44	524.23	1046.44	524.23	0.0002	2	28.4	16	Elution from: 26.245 to 26.245 scan no 1600 cid35.00 polarity:+:MA10	26.245	1	25	R	S
IF4B_HUMAN	Eukaryotic translation initiation factor 4B OS=Homo sapiens GN=EIF4B PE=1 SV=2	HPSWR	Label:13C(6)15N(4) (R);Phospho (ST)	10.008269@R:5,79.966331@S:3	771.309	386.662	771.309	386.662	-0.0001	2	25.9	23.1	Elution from: 28.169 to 28.169 scan no 1850 cid35.00 polarity:+:MA10	28.169	0	25	R	S
IF4G1_HUMAN	Eukaryotic translation initiation factor 4 gamma 1 OS=Homo sapiens GN=EIF4G1 PE=1 SV=4	EAALPPVSPLK	Label:2H(4) (K);Phospho (ST)	4.025107@K:11,79.966331@S:8	1204.64	603.328	1204.64	603.328	0.0015	2	26.8	17.1	Elution from: 50.992 to 50.992 scan no 4740 cid35.00 polarity:+:MA10:m1s	50.992	0	25	R	A
IF4G1_HUMAN	Eukaryotic translation initiation factor 4 gamma 1 OS=Homo sapiens GN=EIF4G1 PE=1 SV=4	WLREAEEESDHN	Phospho (ST)	79.966331@S:9	1593.61	532.211	1593.61	532.21	0.0008	3	24	5.9	Elution from: 37.520 to 37.520 scan no 3284 cid35.00 polarity:+:MA10:m1s	37.52	1	26	K	-
IGF1R_HUMAN	Insulin-like growth factor 1 receptor OS=Homo sapiens GN=IGF1R PE=1 SV=1	ALPLPQSSTC	Carbamidomethyl (C);Phospho (ST)	57.021465@C:10,79.966332@T:9	1152.49	577.251	1152.49	577.252	-0.0002	2	47.6	9.9	Elution from: 49.810 to 49.810 scan no 4773 cid35.00 polarity:+:MA10	49.81	0	26	R	-
IKZF5_HUMAN	Zinc finger protein Pegasus OS=Homo sapiens GN=IKZF5 PE=1 SV=1	KTSNLGYSRR	Label:2H(4) (K);Phospho (ST);Phospho (Y)	4.025107@K:1,79.966331@S:3,79.966331@Y:7	1344.59	449.205	1344.59	449.204	0.0037	3	31.9	6	Elution from: 19.969 to 19.969 scan no 913 cid35.00 polarity:+:MA10	19.969	2	26	K	A
ILF3_HUMAN	Interleukin enhancer-binding factor 3 OS=Homo sapiens GN=ILF3 PE=1 SV=3	RPMEEDGEEKSPSK	Oxidation (M);Phospho (ST)	15.994915@M:3,79.966331@S:11	1713.69	572.238	1713.69	572.238	0.0001	3	41.2	7	Elution from: 22.648 to 22.648 scan no 1217 cid35.00 polarity:+:MA10	22.648	1	26	K	K
ILF3_HUMAN	Interleukin enhancer-binding factor 3 OS=Homo sapiens GN=ILF3 PE=1 SV=3	RPMEEDGEEKSPSK	Phospho (ST)	79.966331@S:11	1697.7	566.906	1697.7	566.906	0	3	37.5	7.7	Elution from: 24.725 to 24.725 scan no 1486 cid35.00 polarity:+:MA10:m1s	24.725	1	26	K	K
ILF3_HUMAN	Interleukin enhancer-binding factor 3 OS=Homo sapiens GN=ILF3 PE=1 SV=3	RPMEEDGEEKSPSK	Label:13C(6)15N(4) (R);2 Label:2H(4) (K);Oxidation (M);Phospho (ST)	10.008269@R:1,4.025107@K:10,4.025107@K:14,15.994915@M:3,79.966331@S:11	1731.75	578.257	1731.75	578.257	-0.0001	3	37.3	3.5	Elution from: 22.765 to 22.765 scan no 1209 cid35.00 polarity:+:MA10	22.765	1	26	K	K
ILF3_HUMAN	Interleukin enhancer-binding factor 3 OS=Homo sapiens GN=ILF3 PE=1 SV=3	RPMEEDGEEKSPSK	Label:13C(6)15N(4) (R);2 Label:2H(4) (K);Phospho (ST)	10.008269@R:1,4.025107@K:10,4.025107@K:14,79.966331@S:11	1715.76	572.926	1715.76	572.926	0.0017	3	29.7	3.3	Elution from: 24.855 to 24.855 scan no 1427 cid35.00 polarity:+:MA10	24.855	1	26	K	K
IMA2_HUMAN	Importin subunit alpha-2 OS=Homo sapiens GN=KPNA2 PE=1 SV=1	NVSSFPDDATSPLQENR	Label:13C(6)15N(4) (R);Phospho (ST)	10.008269@R:17,79.966331@S:11	1965.83	983.925	1965.83	983.925	0	2	112.8	6.2	Elution from: 52.392 to 52.392 scan no 4984 cid35.00 polarity:+:MA10:m1s	52.392	0	25	R	N
IMA2_HUMAN	Importin subunit alpha-2 OS=Homo sapiens GN=KPNA2 PE=1 SV=1	NVSSFPDDATSPLQENR	Phospho (ST)	79.966331@S:11	1955.83	978.921	1955.83	978.92	0.0018	2	54.9	0	Elution from: 52.595 to 52.595 scan no 4939 cid35.00 polarity:+:MA10	52.595	0	26	R	N
IMA3_HUMAN	Importin subunit alpha-3 OS=Homo sapiens GN=KPNA3 PE=1 SV=2	NVPQEESLEDSDVDADFK	Label:2H(4) (K);Phospho (ST)	4.025107@K:18,79.966331@S:11	2119.88	1060.95	2119.88	1060.95	0.002	2	96.5	25.3	Elution from: 56.427 to 56.427 scan no 5387 cid35.00 polarity:+:MA10:m1s	56.427	0	25	R	A
IMA3_HUMAN	Importin subunit alpha-3 OS=Homo sapiens GN=KPNA3 PE=1 SV=2	RNVPQEESLEDSDVDADFK	Label:13C(6)15N(4) (R);Label:2H(4) (K);Phospho (ST)	10.008269@R:1,4.025107@K:19,79.966331@S:12	2285.99	763.003	2285.99	763.003	0.0012	3	38.3	19.9	Elution from: 51.538 to 51.538 scan no 4776 cid35.00 polarity:+:MA10:m1s	51.538	1	25	K	A
INCE_HUMAN	Inner centromere protein OS=Homo sapiens GN=INCENP PE=1 SV=3	IAQVSPGPR	Phospho (ST)	79.966331@S:5	1003.49	502.75	1003.49	502.75	0.0001	2	23.5	5.6	Elution from: 31.082 to 31.082 scan no 2265 cid35.00 polarity:+:MA10	31.082	0	25	R	D
IPP2_HUMAN	Protein phosphatase inhibitor 2 OS=Homo sapiens GN=PPP1R2 PE=1 SV=2	YRIQEQESSGEEDSDLSPEEREK	2 Phospho (ST)	79.966331@S:8,79.966331@S:9	2899.14	967.389	2899.14	967.388	0.0015	3	66.9	21.6	Elution from: 43.649 to 43.649 scan no 3870 cid35.00 polarity:+:MA10:m1s	43.649	2	25	K	K
IPP2_HUMAN	Protein phosphatase inhibitor 2 OS=Homo sapiens GN=PPP1R2 PE=1 SV=2	IQEQESSGEEDSDLSPEEREK	2 Phospho (ST)	79.966331@S:6,79.966331@S:7	2579.98	861.001	2579.98	861	0.0023	3	56.3	26.4	Elution from: 39.546 to 39.546 scan no 3388 cid35.00 polarity:+:MA10:m1s	39.546	1	26	R	K
IPP2_HUMAN	Protein phosphatase inhibitor 2 OS=Homo sapiens GN=PPP1R2 PE=1 SV=2	IQEQESSGEEDSDLSPEEREK	Label:13C(6)15N(4) (R);Label:2H(4) (K);2 Phospho (ST)	10.008269@R:19,4.025107@K:21,79.966331@S:6,79.966331@S:7	2594.01	865.679	2594.01	865.678	0.0022	3	51.3	26	Elution from: 39.699 to 39.699 scan no 3435 cid35.00 polarity:+:MA10:m1s	39.699	1	26	R	K
IPP2_HUMAN	Protein phosphatase inhibitor 2 OS=Homo sapiens GN=PPP1R2 PE=1 SV=2	YRIQEQESSGEEDSDLSPEER	2 Phospho (ST)	79.966331@S:8,79.966331@S:9	2642.01	881.677	2642.01	881.676	0.002	3	44.9	2.4	Elution from: 46.931 to 46.931 scan no 4266 cid35.00 polarity:+:MA10:m1s	46.931	1	26	K	E
IPP2_HUMAN	Protein phosphatase inhibitor 2 OS=Homo sapiens GN=PPP1R2 PE=1 SV=2	IQEQESSGEEDSDLSPEER	2 Phospho (ST)	79.966331@S:6,79.966331@S:7	2322.84	775.289	2322.84	775.288	0.0033	3	28.7	17.8	Elution from: 43.234 to 43.234 scan no 3850 cid35.00 polarity:+:MA10:m1s	43.234	0	26	R	E
IPYR2_HUMAN	Inorganic pyrophosphatase 2, mitochondrial OS=Homo sapiens GN=PPA2 PE=1 SV=2	SLVESVSSSPNK	Phospho (ST)	79.966331@S:9	1312.59	657.303	1312.59	657.303	0.0002	2	52.6	7.3	Elution from: 38.563 to 38.563 scan no 3284 cid35.00 polarity:+:MA10	38.563	0	26	R	E
IPYR2_HUMAN	Inorganic pyrophosphatase 2, mitochondrial OS=Homo sapiens GN=PPA2 PE=1 SV=2	SLVESVSSSPNK	Label:2H(4) (K);Phospho (ST)	4.025107@K:12,79.966331@S:9	1316.62	659.316	1316.62	659.315	0.0005	2	39	0	Elution from: 39.011 to 39.011 scan no 3456 cid35.00 polarity:+:MA10	39.011	0	25	R	E
IRS2_HUMAN	Insulin receptor substrate 2 OS=Homo sapiens GN=IRS2 PE=1 SV=2	RHNSASVENVSLRK	Phospho (ST)	79.966331@S:6	1675.81	419.961	1675.82	419.961	-0.001	4	67.6	5	Elution from: 28.567 to 28.567 scan no 1889 cid35.00 polarity:+:MA10	28.567	2	26	K	S
IRS2_HUMAN	Insulin receptor substrate 2 OS=Homo sapiens GN=IRS2 PE=1 SV=2	RHNSASVENVSLRK	Phospho (ST)	79.966331@S:4	1675.82	419.961	1675.82	419.961	0.0004	4	66.8	1.4	Elution from: 28.383 to 28.383 scan no 1880 cid35.00 polarity:+:MA10:m1s	28.383	2	25	K	S
ITAM_HUMAN	Integrin alpha-M OS=Homo sapiens GN=ITGAM PE=1 SV=2	STFINMTR	Oxidation (M);2 Phospho (ST)	15.994915@M:6,79.966332@T:2,79.966332@T:7	1144.4	382.474	1144.4	382.475	-0.0011	3	17.8	0	Elution from: 31.032 to 31.032 scan no 2319 cid35.00 polarity:+:MA10	31.032	0	25	K	V
IWS1_HUMAN	Protein IWS1 homolog OS=Homo sapiens GN=IWS1 PE=1 SV=2	AAVLSDSEDEEK	2 Phospho (ST)	79.966331@S:5,79.966331@S:7	1451.51	726.763	1451.51	726.763	0.0015	2	40.5	38	Elution from: 36.692 to 36.692 scan no 3161 cid35.00 polarity:+:MA10	36.692	0	26	K	A
JAM1_HUMAN	Junctional adhesion molecule A OS=Homo sapiens GN=F11R PE=1 SV=1	VIYSQPSARSEGEFK	Label:13C(6)15N(4) (R);Label:2H(4) (K);2 Phospho (ST)	10.008269@R:9,4.025107@K:15,79.966331@S:7,79.966331@S:10	1870.81	624.61	1870.81	624.61	0.0005	3	33.9	22.8	Elution from: 45.861 to 45.861 scan no 4197 cid35.00 polarity:+:MA10	45.861	1	26	K	Q
JIP4_HUMAN	C-Jun-amino-terminal kinase-interacting protein 4 OS=Homo sapiens GN=SPAG9 PE=1 SV=4	SASQSSLDKLDQELK	2 Label:2H(4) (K);Phospho (ST)	4.025107@K:9,4.025107@K:15,79.966331@S:5	1735.85	579.624	1735.85	579.623	0.0021	3	51.2	0.9	Elution from: 50.096 to 50.096 scan no 4741 cid35.00 polarity:+:MA10:m1s	50.096	1	26	R	E
JIP4_HUMAN	C-Jun-amino-terminal kinase-interacting protein 4 OS=Homo sapiens GN=SPAG9 PE=1 SV=4	SASQSSLDKLDQELK	2 Phospho (ST)	79.966331@S:3,79.966331@S:5	1807.77	904.89	1807.76	904.889	0.0018	2	49	0	Elution from: 55.756 to 55.756 scan no 5179 cid35.00 polarity:+:MA10:m1s	55.756	1	26	R	E
JIP4_HUMAN	C-Jun-amino-terminal kinase-interacting protein 4 OS=Homo sapiens GN=SPAG9 PE=1 SV=4	SASQSSLDKLDQELK	2 Label:2H(4) (K);Phospho (ST)	4.025107@K:9,4.025107@K:15,79.966331@S:6	1735.85	579.624	1735.85	579.623	0.0008	3	46.1	1.9	Elution from: 50.316 to 50.316 scan no 4819 cid35.00 polarity:+:MA10	50.316	1	26	R	E
JIP4_HUMAN	C-Jun-amino-terminal kinase-interacting protein 4 OS=Homo sapiens GN=SPAG9 PE=1 SV=4	SASQSSLDKLDQELK	Phospho (ST)	79.966331@S:6	1727.8	576.94	1727.8	576.94	0.0012	3	45.3	8.2	Elution from: 50.355 to 50.355 scan no 4652 cid35.00 polarity:+:MA10:m1s	50.355	1	25	R	E
JIP4_HUMAN	C-Jun-amino-terminal kinase-interacting protein 4 OS=Homo sapiens GN=SPAG9 PE=1 SV=4	SASQSSLDKLDQELK	2 Phospho (ST)	79.966331@S:3,79.966331@S:6	1807.76	904.89	1807.76	904.889	0.0005	2	26	0	Elution from: 55.784 to 55.784 scan no 5234 cid35.00 polarity:+:MA10	55.784	1	26	R	E
K0947_HUMAN	Uncharacterized protein KIAA0947 OS=Homo sapiens GN=KIAA0947 PE=1 SV=5	LDTGSPEPETR	Phospho (ST)	79.966331@S:5	1280.53	641.272	1280.53	641.272	0	2	32	14.2	Elution from: 31.032 to 31.032 scan no 2345 cid35.00 polarity:+:MA10	31.032	0	26	R	G
K1143_HUMAN	Uncharacterized protein KIAA1143 OS=Homo sapiens GN=KIAA1143 PE=1 SV=2	NSSLLSFDNEDENE	Phospho (ST)	79.966331@S:6	1691.62	846.818	1691.62	846.817	0.0012	2	72	30	Elution from: 67.201 to 67.201 scan no 6188 cid35.00 polarity:+:MA10	67.201	0	26	K	-
K1143_HUMAN	Uncharacterized protein KIAA1143 OS=Homo sapiens GN=KIAA1143 PE=1 SV=2	RIQPQPPDEDGDHSDKEDEQPQVVVLK	Phospho (ST)	79.966331@S:14	3177.46	795.373	3177.46	795.373	0.0019	4	31.7	20.7	Elution from: 45.370 to 45.370 scan no 4096 cid35.00 polarity:+:MA10:m1s	45.37	2	26	K	K
K1324_HUMAN	UPF0577 protein KIAA1324 OS=Homo sapiens GN=KIAA1324 PE=2 SV=2	MSVCTDNVTDLRIPEGESGFSK	Carbamidomethyl (C);Label:13C(6)15N(4) (R);3 Phospho (ST)	57.021465@C:4,10.008269@R:12,79.966332@T:5,79.966331@S:18,79.966331@S:21	2691.03	673.765	2691.03	673.764	0.0053	4	29.2	9.8	Elution from: 64.131 to 64.131 scan no 5921 cid35.00 polarity:+:MA10	64.131	1	25	K	S
K1967_HUMAN	DBIRD complex subunit KIAA1967 OS=Homo sapiens GN=KIAA1967 PE=1 SV=2	LEDSEVRSVASNQSEMEFSSLQDMPK	3 Phospho (ST)	79.966331@S:8,79.966331@S:11,79.966331@S:14	3182.23	1061.75	3182.23	1061.75	0.0053	3	47.6	16.9	Elution from: 68.581 to 68.581 scan no 6490 cid35.00 polarity:+:MA10:m1s	68.581	1	26	K	E
K1C17_HUMAN	Keratin, type I cytoskeletal 17 OS=Homo sapiens GN=KRT17 PE=1 SV=2	QFTSSSSIK	Phospho (ST)	79.966331@S:7	1063.46	532.737	1063.46	532.737	0.0007	2	52.1	14.6	Elution from: 33.447 to 33.447 scan no 2601 cid35.00 polarity:+:MA10	33.447	0	25	R	G
K1C17_HUMAN	Keratin, type I cytoskeletal 17 OS=Homo sapiens GN=KRT17 PE=1 SV=2	TSCRLSGGLGAGSCR	2 Carbamidomethyl (C);Phospho (ST)	57.021465@C:3,57.021465@C:14,79.966331@S:6	1617.68	540.232	1617.68	540.232	0.0005	3	36.6	13.5	Elution from: 36.771 to 36.771 scan no 3152 cid35.00 polarity:+:MA10	36.771	1	25	R	L
K1C17_HUMAN	Keratin, type I cytoskeletal 17 OS=Homo sapiens GN=KRT17 PE=1 SV=2	LSGGLGAGSCR	Carbamidomethyl (C);Phospho (ST)	57.021465@C:10,79.966331@S:2	1113.46	557.739	1113.46	557.739	-0.0003	2	29.8	15.3	Elution from: 34.900 to 34.900 scan no 2877 cid35.00 polarity:+:MA10	34.9	0	25	R	L
K1C18_HUMAN	Keratin, type I cytoskeletal 18 OS=Homo sapiens GN=KRT18 PE=1 SV=2	STFSTNYR	Label:13C(6)15N(4) (R);Phospho (ST)	10.008269@R:8,79.966332@T:2	1064.42	533.218	1064.42	533.217	0.0003	2	49.6	11.3	Elution from: 39.736 to 39.736 scan no 3440 cid35.00 polarity:+:MA10	39.736	0	26	R	S
K1C18_HUMAN	Keratin, type I cytoskeletal 18 OS=Homo sapiens GN=KRT18 PE=1 SV=2	STFSTNYR	Label:13C(6)15N(4) (R);Phospho (ST)	10.008269@R:8,79.966331@S:1	1064.42	533.218	1064.42	533.217	0.0003	2	44.8	1.9	Elution from: 39.662 to 39.662 scan no 3391 cid35.00 polarity:+:MA10	39.662	0	25	R	S
K2C1_HUMAN	Keratin, type II cytoskeletal 1 OS=Homo sapiens GN=KRT1 PE=1 SV=6	GSGGGSSGGSIGGRGSSSGGVKSSGGSSSVK	Label:13C(6)15N(4) (R);Label:2H(4) (K);4 Phospho (ST)	10.008269@R:14,4.025107@K:22,79.966331@S:24,79.966331@S:27,79.966331@S:28,79.966331@S:29	2861.08	716.276	2861.08	716.278	-0.008	4	26.5	10.3	Elution from: 58.816 to 58.816 scan no 5510 cid35.00 polarity:+:MA10:m1s	58.816	2	26	R	F
K2C8_HUMAN	Keratin, type II cytoskeletal 8 OS=Homo sapiens GN=KRT8 PE=1 SV=7	SLDMDSIIAEVK	Label:2H(4) (K);Phospho (ST)	4.025107@K:12,79.966331@S:6	1403.66	702.836	1403.66	702.835	0.0016	2	76.3	49.1	Elution from: 74.662 to 74.662 scan no 6848 cid35.00 polarity:+:MA10	74.662	0	26	R	A
K2C8_HUMAN	Keratin, type II cytoskeletal 8 OS=Homo sapiens GN=KRT8 PE=1 SV=7	ISSSSFSR	Phospho (ST)	79.966331@S:2	949.391	475.703	949.391	475.703	0.0002	2	33.5	1.8	Elution from: 37.439 to 37.439 scan no 3238 cid35.00 polarity:+:MA10	37.439	0	25	R	V
K2C8_HUMAN	Keratin, type II cytoskeletal 8 OS=Homo sapiens GN=KRT8 PE=1 SV=7	ISSSSFSR	Label:13C(6)15N(4) (R);Phospho (ST)	10.008269@R:8,79.966331@S:2	959.399	480.707	959.399	480.707	0.0001	2	30	0	Elution from: 36.959 to 36.959 scan no 3157 cid35.00 polarity:+:MA10	36.959	0	26	R	V
K2C8_HUMAN	Keratin, type II cytoskeletal 8 OS=Homo sapiens GN=KRT8 PE=1 SV=7	ISSSSFSR	Label:13C(6)15N(4) (R);Phospho (ST)	10.008269@R:8,79.966331@S:5	959.399	480.707	959.399	480.707	0.0003	2	29.6	0.8	Elution from: 36.136 to 36.136 scan no 2915 cid35.00 polarity:+:MA10	36.136	0	25	R	V
K2C8_HUMAN	Keratin, type II cytoskeletal 8 OS=Homo sapiens GN=KRT8 PE=1 SV=7	ISSSSFSR	Label:13C(6)15N(4) (R);Phospho (ST)	10.008269@R:8,79.966331@S:3	959.399	480.707	959.399	480.707	0.0002	2	27.5	1.6	Elution from: 34.692 to 34.692 scan no 2770 cid35.00 polarity:+:MA10	34.692	0	25	R	V
K2C8_HUMAN	Keratin, type II cytoskeletal 8 OS=Homo sapiens GN=KRT8 PE=1 SV=7	AQYEDIANRSR	2 Label:13C(6)15N(4) (R);Phospho (ST)	10.008269@R:9,10.008269@R:11,79.966331@S:10	1421.62	474.881	1421.62	474.881	0.0004	3	26.9	18.2	Elution from: 34.653 to 34.653 scan no 2764 cid35.00 polarity:+:MA10	34.653	1	25	K	A
K2C80_HUMAN	Keratin, type II cytoskeletal 80 OS=Homo sapiens GN=KRT80 PE=1 SV=2	YFSQESEVSE	Phospho (ST)	79.966331@S:9	1283.46	642.737	1283.46	642.737	-0.0007	2	26.9	16.6	Elution from: 45.456 to 45.456 scan no 4108 cid35.00 polarity:+:MA10	45.456	0	26	K	-
KAP0_HUMAN	cAMP-dependent protein kinase type I-alpha regulatory subunit OS=Homo sapiens GN=PRKAR1A PE=1 SV=1	TDSREDEISPPPPNPVVK	Label:13C(6)15N(4) (R);Label:2H(4) (K);Phospho (ST)	10.008269@R:4,4.025107@K:18,79.966331@S:9	2069.99	691.003	2069.98	691.002	0.0013	3	32.9	15.7	Elution from: 44.081 to 44.081 scan no 3968 cid35.00 polarity:+:MA10:m1s	44.081	1	26	R	G
KAP2_HUMAN	cAMP-dependent protein kinase type II-alpha regulatory subunit OS=Homo sapiens GN=PRKAR2A PE=1 SV=2	VADAKGDSESEEDEDLEVPVPSR	Label:13C(6)15N(4) (R);Label:2H(4) (K);2 Phospho (ST)	10.008269@R:23,4.025107@K:5,79.966331@S:8,79.966331@S:10	2646.08	1324.05	2646.08	1324.05	0.0013	2	79.2	70.1	Elution from: 53.093 to 53.093 scan no 5111 cid35.00 polarity:+:MA10:m1s	53.093	1	26	R	F
KAP2_HUMAN	cAMP-dependent protein kinase type II-alpha regulatory subunit OS=Homo sapiens GN=PRKAR2A PE=1 SV=2	VADAKGDSESEEDEDLEVPVPSR	2 Phospho (ST)	79.966331@S:8,79.966331@S:10	2632.05	1317.03	2632.05	1317.03	0.0034	2	68.7	57.8	Elution from: 53.333 to 53.333 scan no 5017 cid35.00 polarity:+:MA10:m1s	53.333	1	26	R	F
KAP2_HUMAN	cAMP-dependent protein kinase type II-alpha regulatory subunit OS=Homo sapiens GN=PRKAR2A PE=1 SV=2	GDSESEEDEDLEVPVPSR	2 Phospho (ST)	79.966331@S:3,79.966331@S:5	2147.79	1074.9	2147.78	1074.9	0.0044	2	55.2	46.8	Elution from: 58.109 to 58.109 scan no 5447 cid35.00 polarity:+:MA10:m1s	58.109	0	26	K	F
KAP2_HUMAN	cAMP-dependent protein kinase type II-alpha regulatory subunit OS=Homo sapiens GN=PRKAR2A PE=1 SV=2	RVSVCAETYNPDEEEEDTDPR	Carbamidomethyl (C);2 Label:13C(6)15N(4) (R);Phospho (ST)	57.021465@C:5,10.008269@R:1,10.008269@R:21,79.966331@S:3	2610.04	871.019	2610.03	871.018	0.0029	3	46.3	7.2	Elution from: 45.795 to 45.795 scan no 4147 cid35.00 polarity:+:MA10:m1s	45.795	1	26	R	V
KAP2_HUMAN	cAMP-dependent protein kinase type II-alpha regulatory subunit OS=Homo sapiens GN=PRKAR2A PE=1 SV=2	RVSVCAETYNPDEEEEDTDPR	Carbamidomethyl (C);Phospho (ST)	57.021465@C:5,79.966331@S:3	2590.02	864.347	2590.02	864.346	0.0031	3	44.7	18.1	Elution from: 45.801 to 45.801 scan no 4189 cid35.00 polarity:+:MA10:m1s	45.801	1	26	R	V
KAP2_HUMAN	cAMP-dependent protein kinase type II-alpha regulatory subunit OS=Homo sapiens GN=PRKAR2A PE=1 SV=2	GDSESEEDEDLEVPVPSR	Label:13C(6)15N(4) (R);2 Phospho (ST)	10.008269@R:18,79.966331@S:3,79.966331@S:5	2157.79	1079.9	2157.79	1079.9	0.0005	2	43.8	41.8	Elution from: 58.234 to 58.234 scan no 5458 cid35.00 polarity:+:MA10	58.234	0	26	K	F
KCND2_HUMAN	Potassium voltage-gated channel subfamily D member 2 OS=Homo sapiens GN=KCND2 PE=1 SV=2	CVERTPLSNSR	Carbamidomethyl (C);Label:13C(6)15N(4) (R);Phospho (ST)	57.021465@C:1,10.008269@R:4,79.966331@S:10	1407.62	352.913	1407.62	352.912	0.003	4	30	13	Elution from: 21.298 to 21.298 scan no 1056 cid35.00 polarity:+:MA10:m1s	21.298	1	26	R	S
KDIS_HUMAN	Kinase D-interacting substrate of 220 kDa OS=Homo sapiens GN=KIDINS220 PE=1 SV=3	QMSFDLTK	Oxidation (M);Phospho (ST)	15.994915@M:2,79.966331@S:3	1064.43	533.22	1064.42	533.22	0.0004	2	40.2	25.5	Elution from: 45.420 to 45.420 scan no 4274 cid35.00 polarity:+:MA10	45.42	0	26	R	L
KDIS_HUMAN	Kinase D-interacting substrate of 220 kDa OS=Homo sapiens GN=KIDINS220 PE=1 SV=3	YQKLPSDEDESGTEESDNTPLLK	2 Phospho (ST)	79.966331@S:6,79.966331@S:11	2754.12	919.048	2754.12	919.047	0.0032	3	37.6	5.4	Elution from: 52.197 to 52.197 scan no 5014 cid35.00 polarity:+:MA10:m1s	52.197	1	26	R	D
KDIS_HUMAN	Kinase D-interacting substrate of 220 kDa OS=Homo sapiens GN=KIDINS220 PE=1 SV=3	QMSFDLTK	Phospho (ST)	79.966331@S:3	1048.43	525.222	1048.43	525.222	0.0004	2	27.2	12.9	Elution from: 55.899 to 55.899 scan no 5371 cid35.00 polarity:+:MA10	55.899	0	26	R	L
KDM1A_HUMAN	Lysine-specific histone demethylase 1A OS=Homo sapiens GN=KDM1A PE=1 SV=2	EMDESLANLSEDEYYSEEERNAK	Oxidation (M);Phospho (ST);Phospho (Y)	15.994915@M:2,79.966331@S:10,79.966331@Y:15	2926.08	976.368	2926.08	976.366	0.0034	3	72.8	0.1	Elution from: 55.433 to 55.433 scan no 5253 cid35.00 polarity:+:MA10:m1s	55.433	1	26	R	A
KDM1A_HUMAN	Lysine-specific histone demethylase 1A OS=Homo sapiens GN=KDM1A PE=1 SV=2	EMDESLANLSEDEYYSEEERNAK	2 Phospho (ST)	79.966331@S:10,79.966331@S:16	2910.09	971.036	2910.08	971.035	0.0033	3	55.4	7.7	Elution from: 58.811 to 58.811 scan no 5644 cid35.00 polarity:+:MA10:m1s	58.811	1	26	R	A
KDM2A_HUMAN	Lysine-specific demethylase 2A OS=Homo sapiens GN=KDM2A PE=1 SV=3	RKMEESDEEAVQAK	Oxidation (M);Phospho (ST)	15.994915@M:3,79.966331@S:6	1744.73	582.585	1744.73	582.585	0.0003	3	40.1	26.9	Elution from: 25.276 to 25.276 scan no 1558 cid35.00 polarity:+:MA10	25.276	2	26	K	V
KDM2A_HUMAN	Lysine-specific demethylase 2A OS=Homo sapiens GN=KDM2A PE=1 SV=3	RRYEDDGISDDEIEGK	2 Label:13C(6)15N(4) (R);Label:2H(4) (K);Phospho (ST)	10.008269@R:1,10.008269@R:2,4.025107@K:16,79.966331@S:9	1999.86	667.628	1999.86	667.627	0.0038	3	28.3	12.9	Elution from: 40.681 to 40.681 scan no 3544 cid35.00 polarity:+:MA10	40.681	2	26	R	R
KDM4A_HUMAN	Lysine-specific demethylase 4A OS=Homo sapiens GN=KDM4A PE=1 SV=2	KSSSSLGSGSSR	Label:2H(4) (K);4 Phospho (ST)	4.025107@K:1,79.966331@S:2,79.966331@S:3,79.966331@S:4,79.966331@S:11	1462.45	366.62	1462.45	366.619	0.0018	4	19.1	11.2	Elution from: 32.603 to 32.603 scan no 2477 cid35.00 polarity:+:MA10	32.603	1	25	K	D
KDM4A_HUMAN	Lysine-specific demethylase 4A OS=Homo sapiens GN=KDM4A PE=1 SV=2	KSSSSLGSGSSR	Label:2H(4) (K);4 Phospho (ST)	4.025107@K:1,79.966331@S:2,79.966331@S:3,79.966331@S:10,79.966331@S:11	1462.45	366.62	1462.45	366.619	0.0019	4	16.9	5.1	Elution from: 32.490 to 32.490 scan no 2531 cid35.00 polarity:+:MA10	32.49	1	25	K	D
KI67_HUMAN	Antigen KI-67 OS=Homo sapiens GN=MKI67 PE=1 SV=2	SSPELEDTATSSK	Label:2H(4) (K);Phospho (ST)	4.025107@K:13,79.966331@S:2	1434.61	718.311	1434.61	718.311	0.0008	2	54.9	0.7	Elution from: 34.131 to 34.131 scan no 2773 cid35.00 polarity:+:MA10	34.131	0	25	K	R
KI67_HUMAN	Antigen KI-67 OS=Homo sapiens GN=MKI67 PE=1 SV=2	SGGSGHAVAEPASPEQELDQNK	Phospho (ST)	79.966331@S:13	2286.98	763.333	2286.98	763.332	0.0007	3	52.6	28.5	Elution from: 40.795 to 40.795 scan no 3683 cid35.00 polarity:+:MA10:m1s	40.795	0	26	K	G
KI67_HUMAN	Antigen KI-67 OS=Homo sapiens GN=MKI67 PE=1 SV=2	TPVQYSQQQNSPQK	Phospho (ST)	79.966331@S:11	1711.76	856.886	1711.76	856.886	0.001	2	52	15.2	Elution from: 30.818 to 30.818 scan no 2294 cid35.00 polarity:+:MA10	30.818	0	26	K	H
KI67_HUMAN	Antigen KI-67 OS=Homo sapiens GN=MKI67 PE=1 SV=2	ILCKSPQSDPADTPTNTK	Carbamidomethyl (C);Phospho (ST)	57.021465@C:3,79.966331@S:5	2051.92	684.982	2051.92	684.982	-0.0003	3	46.9	17.8	Elution from: 33.974 to 33.974 scan no 2767 cid35.00 polarity:+:MA10:m1s	33.974	1	26	K	Q
KI67_HUMAN	Antigen KI-67 OS=Homo sapiens GN=MKI67 PE=1 SV=2	SGGSGHAVAEPASPEQELDQNK	Label:2H(4) (K);Phospho (ST)	4.025107@K:22,79.966331@S:13	2291	764.675	2291	764.674	0.002	3	46	33.2	Elution from: 40.986 to 40.986 scan no 3564 cid35.00 polarity:+:MA10:m1s	40.986	0	25	K	G
KI67_HUMAN	Antigen KI-67 OS=Homo sapiens GN=MKI67 PE=1 SV=2	SSPELEDTATSSK	Phospho (ST)	79.966331@S:1	1430.58	716.298	1430.58	716.298	0.0007	2	43.2	8.5	Elution from: 33.620 to 33.620 scan no 2690 cid35.00 polarity:+:MA10	33.62	0	26	K	R
KI67_HUMAN	Antigen KI-67 OS=Homo sapiens GN=MKI67 PE=1 SV=2	TPVQYSQQQNSPQK	Label:2H(4) (K);Phospho (ST)	4.025107@K:14,79.966331@S:11	1715.78	572.935	1715.78	572.935	0.0001	3	38.5	29.9	Elution from: 31.175 to 31.175 scan no 2341 cid35.00 polarity:+:MA10	31.175	0	25	K	H
KI67_HUMAN	Antigen KI-67 OS=Homo sapiens GN=MKI67 PE=1 SV=2	IACKSPPPESVDTPTSTK	Carbamidomethyl (C);Phospho (ST)	57.021465@C:3,79.966331@S:5	1993.91	665.643	1993.91	665.643	0.0008	3	38.4	28	Elution from: 33.785 to 33.785 scan no 2714 cid35.00 polarity:+:MA10:m1s	33.785	1	26	K	Q
KI67_HUMAN	Antigen KI-67 OS=Homo sapiens GN=MKI67 PE=1 SV=2	SSPELEDTATSSK	Phospho (ST)	79.966331@S:2	1430.58	716.299	1430.58	716.298	0.0013	2	36.4	0	Elution from: 33.747 to 33.747 scan no 2735 cid35.00 polarity:+:MA10	33.747	0	26	K	R
KI67_HUMAN	Antigen KI-67 OS=Homo sapiens GN=MKI67 PE=1 SV=2	IACKSPPPESVDTPTSTK	Carbamidomethyl (C);2 Label:2H(4) (K);Phospho (ST)	57.021465@C:3,4.025107@K:4,4.025107@K:18,79.966331@S:5	2001.95	668.325	2001.96	668.326	-0.0026	3	35.2	28	Elution from: 33.865 to 33.865 scan no 2613 cid35.00 polarity:+:MA10:m1s	33.865	1	25	K	Q
KLC2_HUMAN	Kinesin light chain 2 OS=Homo sapiens GN=KLC2 PE=1 SV=1	RASSLNFLNK	Phospho (ST)	79.966331@S:3	1228.6	615.306	1228.6	615.306	0.0003	2	42.2	8.3	Elution from: 49.049 to 49.049 scan no 4515 cid35.00 polarity:+:MA10	49.049	1	26	K	S
KLC2_HUMAN	Kinesin light chain 2 OS=Homo sapiens GN=KLC2 PE=1 SV=1	RASSLNFLNK	Phospho (ST)	79.966331@S:4	1228.6	615.306	1228.6	615.306	-0.0001	2	39.2	7.9	Elution from: 48.974 to 48.974 scan no 4501 cid35.00 polarity:+:MA10	48.974	1	25	K	S
KLC2_HUMAN	Kinesin light chain 2 OS=Homo sapiens GN=KLC2 PE=1 SV=1	RASSLNFLNK	Label:13C(6)15N(4) (R);Label:2H(4) (K);Phospho (ST)	10.008269@R:1,4.025107@K:10,79.966331@S:4	1242.63	622.323	1242.63	622.322	0.0011	2	32.6	0	Elution from: 49.067 to 49.067 scan no 4556 cid35.00 polarity:+:MA10	49.067	1	26	K	S
KLC2_HUMAN	Kinesin light chain 2 OS=Homo sapiens GN=KLC2 PE=1 SV=1	RASSLNFLNK	Label:13C(6)15N(4) (R);Label:2H(4) (K);Phospho (ST)	10.008269@R:1,4.025107@K:10,79.966331@S:3	1242.63	622.323	1242.63	622.322	0.0009	2	28.2	2.4	Elution from: 49.018 to 49.018 scan no 4511 cid35.00 polarity:+:MA10	49.018	1	26	K	S
KLC4_HUMAN	Kinesin light chain 4 OS=Homo sapiens GN=KLC4 PE=1 SV=3	GLSASTMDLSSSS	Phospho (ST)	79.966331@S:5	1321.51	661.763	1321.51	661.763	0.0006	2	39.7	0	Elution from: 55.641 to 55.641 scan no 5167 cid35.00 polarity:+:MA10	55.641	0	26	R	-
KLC4_HUMAN	Kinesin light chain 4 OS=Homo sapiens GN=KLC4 PE=1 SV=3	GLSASTMDLSSSS	Phospho (ST)	79.966332@T:6	1321.51	661.763	1321.51	661.763	-0.0001	2	39.2	0	Elution from: 55.313 to 55.313 scan no 5312 cid35.00 polarity:+:MA10	55.313	0	26	R	-
KLDC4_HUMAN	Kelch domain-containing protein 4 OS=Homo sapiens GN=KLHDC4 PE=1 SV=1	QVLTAPGSAGQPRSEDEDSLEEAGSPAPGPCPR	Carbamidomethyl (C);2 Phospho (ST)	57.021465@C:31,79.966331@S:14,79.966331@S:25	3521.48	1174.84	3521.48	1174.83	0.0038	3	45.2	2.3	Elution from: 51.118 to 51.118 scan no 4730 cid35.00 polarity:+:MA10:m1s	51.118	1	25	K	S
KRI1_HUMAN	Protein KRI1 homolog OS=Homo sapiens GN=KRI1 PE=1 SV=2	AFVEDSEDEDGAGEGGSSLLQK	Phospho (ST)	79.966331@S:6	2318.94	1160.48	2318.94	1160.48	0.0018	2	135.2	98.7	Elution from: 54.839 to 54.839 scan no 5200 cid35.00 polarity:+:MA10:m1s	54.839	0	26	R	R
KRI1_HUMAN	Protein KRI1 homolog OS=Homo sapiens GN=KRI1 PE=1 SV=2	AFVEDSEDEDGAGEGGSSLLQK	Label:2H(4) (K);Phospho (ST)	4.025107@K:22,79.966331@S:6	2322.97	1162.49	2322.97	1162.49	0.0031	2	112.2	95.1	Elution from: 55.336 to 55.336 scan no 5168 cid35.00 polarity:+:MA10:m1s	55.336	0	25	R	R
KRI1_HUMAN	Protein KRI1 homolog OS=Homo sapiens GN=KRI1 PE=1 SV=2	QLPALDGSLMGPESPPAQEEEAPVSPHK	Oxidation (M);2 Phospho (ST)	15.994915@M:10,79.966331@S:14,79.966331@S:25	3086.34	1029.79	3086.33	1029.79	0.0025	3	44.7	27.7	Elution from: 59.715 to 59.715 scan no 5639 cid35.00 polarity:+:MA10:m1s	59.715	0	26	R	K
KRI1_HUMAN	Protein KRI1 homolog OS=Homo sapiens GN=KRI1 PE=1 SV=2	QLPALDGSLMGPESPPAQEEEAPVSPHK	2 Phospho (ST)	79.966331@S:14,79.966331@S:25	3070.35	1024.46	3070.34	1024.45	0.0059	3	41	6.8	Elution from: 65.295 to 65.295 scan no 6201 cid35.00 polarity:+:MA10:m1s	65.295	0	26	R	K
KRI1_HUMAN	Protein KRI1 homolog OS=Homo sapiens GN=KRI1 PE=1 SV=2	YVDEENSDGETSNHR	Phospho (ST)	79.966331@S:7	1830.67	916.343	1830.67	916.342	0.0017	2	37.7	14.2	Elution from: 27.084 to 27.084 scan no 1779 cid35.00 polarity:+:MA10	27.084	0	26	K	L
KS6A3_HUMAN	Ribosomal protein S6 kinase alpha-3 OS=Homo sapiens GN=RPS6KA3 PE=1 SV=1	NQSPVLEPVGR	Label:13C(6)15N(4) (R);Phospho (ST)	10.008269@R:11,79.966331@S:3	1284.61	643.313	1284.61	643.312	0.0019	2	41.6	25.9	Elution from: 41.637 to 41.637 scan no 3710 cid35.00 polarity:+:MA10	41.637	0	25	R	S
KTN1_HUMAN	Kinectin OS=Homo sapiens GN=KTN1 PE=1 SV=1	KVEPVPVTKQPTPPSEAAASK	Phospho (ST)	79.966332@T:12	2240.15	747.723	2240.15	747.722	0.0018	3	45.3	14.2	Elution from: 36.690 to 36.690 scan no 3142 cid35.00 polarity:+:MA10	36.69	2	26	K	K
KTN1_HUMAN	Kinectin OS=Homo sapiens GN=KTN1 PE=1 SV=1	EIQNGNLHESDSESVPR	Phospho (ST)	79.966331@S:10	1989.85	995.931	1989.84	995.929	0.0047	2	33.6	1.7	Elution from: 38.894 to 38.894 scan no 3433 cid35.00 polarity:+:MA10:m1s	38.894	0	26	K	D
KTN1_HUMAN	Kinectin OS=Homo sapiens GN=KTN1 PE=1 SV=1	EIQNGNLHESDSESVPRDFK	2 Phospho (ST)	79.966331@S:10,79.966331@S:14	2460	821.008	2460	821.007	0.0014	3	28.8	9	Elution from: 47.150 to 47.150 scan no 4406 cid35.00 polarity:+:MA10:m1s	47.15	1	26	K	L
LA_HUMAN	Lupus La protein OS=Homo sapiens GN=SSB PE=1 SV=2	FASDDEHDEHDENGATGPVK	Phospho (ST)	79.966331@S:3	2248.86	1125.44	2248.85	1125.43	0.0039	2	90.8	62.5	Elution from: 33.559 to 33.559 scan no 2570 cid35.00 polarity:+:MA10:m1s	33.559	0	26	K	R
LA_HUMAN	Lupus La protein OS=Homo sapiens GN=SSB PE=1 SV=2	TKFASDDEHDEHDENGATGPVK	2 Label:2H(4) (K);Phospho (ST)	4.025107@K:2,4.025107@K:22,79.966331@S:5	2486.05	829.69	2486.05	829.69	0.0012	3	76.1	23.1	Elution from: 31.281 to 31.281 scan no 2256 cid35.00 polarity:+:MA10:m1s	31.281	1	26	K	R
LA_HUMAN	Lupus La protein OS=Homo sapiens GN=SSB PE=1 SV=2	TKFASDDEHDEHDENGATGPVK	Phospho (ST)	79.966331@S:5	2478	827.007	2478	827.006	0.0021	3	67.3	18.2	Elution from: 31.252 to 31.252 scan no 2252 cid35.00 polarity:+:MA10:m1s	31.252	1	26	K	R
LA_HUMAN	Lupus La protein OS=Homo sapiens GN=SSB PE=1 SV=2	FASDDEHDEHDENGATGPVK	Label:2H(4) (K);Phospho (ST)	4.025107@K:20,79.966331@S:3	2252.88	751.968	2252.88	751.967	0.0015	3	58.5	42.3	Elution from: 33.385 to 33.385 scan no 2595 cid35.00 polarity:+:MA10:m1s	33.385	0	25	K	R
LAP2A_HUMAN	Lamina-associated polypeptide 2, isoform alpha OS=Homo sapiens GN=TMPO PE=1 SV=2	SSTPLPTISSSAENTR	Phospho (ST)	79.966332@T:7	1726.78	576.6	1726.78	576.6	0.0014	3	68.6	2.9	Elution from: 45.595 to 45.595 scan no 4167 cid35.00 polarity:+:MA10:m1s	45.595	0	25	R	Q
LAP2A_HUMAN	Lamina-associated polypeptide 2, isoform alpha OS=Homo sapiens GN=TMPO PE=1 SV=2	SSTPLPTISSSAENTR	Label:13C(6)15N(4) (R);Phospho (ST)	10.008269@R:16,79.966332@T:7	1736.79	579.936	1736.79	579.936	0.0018	3	43	4.4	Elution from: 45.644 to 45.644 scan no 4124 cid35.00 polarity:+:MA10	45.644	0	25	R	Q
LAP2B_HUMAN	Lamina-associated polypeptide 2, isoforms beta/gamma OS=Homo sapiens GN=TMPO PE=1 SV=2	GPPDFSSDEEREPTPVLGSGAAAAGR	Phospho (ST)	79.966332@T:14	2649.17	884.065	2649.17	884.064	0.0023	3	91	23.9	Elution from: 51.964 to 51.964 scan no 4992 cid35.00 polarity:+:MA10:m1s	51.964	1	26	K	S
LAP2B_HUMAN	Lamina-associated polypeptide 2, isoforms beta/gamma OS=Homo sapiens GN=TMPO PE=1 SV=2	GPPDFSSDEEREPTPVLGSGAAAAGR	2 Phospho (ST)	79.966331@S:6,79.966331@S:7	2729.14	910.721	2729.14	910.72	0.0031	3	80.8	26.3	Elution from: 56.468 to 56.468 scan no 5353 cid35.00 polarity:+:MA10:m1s	56.468	1	26	K	S
LAP2B_HUMAN	Lamina-associated polypeptide 2, isoforms beta/gamma OS=Homo sapiens GN=TMPO PE=1 SV=2	SSTPLPTISSSAENTR	Label:13C(6)15N(4) (R);Phospho (ST)	10.008269@R:16,79.966332@T:3	1736.79	869.4	1736.79	869.4	0.0008	2	79.5	9	Elution from: 45.513 to 45.513 scan no 4286 cid35.00 polarity:+:MA10	45.513	0	26	R	Q
LAP2B_HUMAN	Lamina-associated polypeptide 2, isoforms beta/gamma OS=Homo sapiens GN=TMPO PE=1 SV=2	SSTPLPTISSSAENTR	Phospho (ST)	79.966332@T:3	1726.78	864.397	1726.78	864.396	0.0012	2	76.3	8.8	Elution from: 45.010 to 45.010 scan no 4210 cid35.00 polarity:+:MA10	45.01	0	26	R	Q
LAP2B_HUMAN	Lamina-associated polypeptide 2, isoforms beta/gamma OS=Homo sapiens GN=TMPO PE=1 SV=2	GPPDFSSDEEREPTPVLGSGAAAAGR	2 Label:13C(6)15N(4) (R);2 Phospho (ST)	10.008269@R:11,10.008269@R:26,79.966331@S:6,79.966331@S:7	2749.16	917.393	2749.15	917.392	0.0031	3	73.1	30	Elution from: 58.059 to 58.059 scan no 5391 cid35.00 polarity:+:MA10:m1s	58.059	1	26	K	S
LAP2B_HUMAN	Lamina-associated polypeptide 2, isoforms beta/gamma OS=Homo sapiens GN=TMPO PE=1 SV=2	GPPDFSSDEEREPTPVLGSGAAAAGR	3 Phospho (ST)	79.966331@S:6,79.966331@S:7,79.966332@T:14	2809.11	937.376	2809.1	937.375	0.003	3	72	16.5	Elution from: 58.145 to 58.145 scan no 5501 cid35.00 polarity:+:MA10:m1s	58.145	1	26	K	S
LAP2B_HUMAN	Lamina-associated polypeptide 2, isoforms beta/gamma OS=Homo sapiens GN=TMPO PE=1 SV=2	SSTPLPTISSSAENTR	Phospho (ST)	79.966331@S:1	1726.78	864.397	1726.78	864.396	0.0014	2	71.9	2.2	Elution from: 45.674 to 45.674 scan no 4306 cid35.00 polarity:+:MA10	45.674	0	26	R	Q
LAP2B_HUMAN	Lamina-associated polypeptide 2, isoforms beta/gamma OS=Homo sapiens GN=TMPO PE=1 SV=2	SSTPLPTISSSAENTR	Phospho (ST)	79.966331@S:2	1726.78	864.397	1726.78	864.396	0.0013	2	68.4	0	Elution from: 45.640 to 45.640 scan no 4246 cid35.00 polarity:+:MA10	45.64	0	26	R	Q
LAP2B_HUMAN	Lamina-associated polypeptide 2, isoforms beta/gamma OS=Homo sapiens GN=TMPO PE=1 SV=2	GPPDFSSDEEREPTPVLGSGAAAAGR	2 Phospho (ST)	79.966331@S:6,79.966331@S:19	2729.14	910.721	2729.14	910.72	0.0024	3	57.1	6.5	Elution from: 53.808 to 53.808 scan no 5110 cid35.00 polarity:+:MA10:m1s	53.808	1	26	K	S
LAP2B_HUMAN	Lamina-associated polypeptide 2, isoforms beta/gamma OS=Homo sapiens GN=TMPO PE=1 SV=2	GPPDFSSDEEREPTPVLGSGAAAAGR	2 Label:13C(6)15N(4) (R);3 Phospho (ST)	10.008269@R:11,10.008269@R:26,79.966331@S:6,79.966331@S:7,79.966332@T:14	2829.12	944.048	2829.12	944.047	0.0029	3	52.1	19.3	Elution from: 57.623 to 57.623 scan no 5453 cid35.00 polarity:+:MA10:m1s	57.623	1	26	K	S
LAP2B_HUMAN	Lamina-associated polypeptide 2, isoforms beta/gamma OS=Homo sapiens GN=TMPO PE=1 SV=2	GPPDFSSDEEREPTPVLGSGAAAAGR	2 Label:13C(6)15N(4) (R);2 Phospho (ST)	10.008269@R:11,10.008269@R:26,79.966331@S:6,79.966332@T:14	2749.16	688.297	2749.15	688.296	0.0038	4	46.5	9.4	Elution from: 56.386 to 56.386 scan no 5288 cid35.00 polarity:+:MA10	56.386	1	26	K	S
LAP2B_HUMAN	Lamina-associated polypeptide 2, isoforms beta/gamma OS=Homo sapiens GN=TMPO PE=1 SV=2	GPPDFSSDEEREPTPVLGSGAAAAGR	2 Phospho (ST)	79.966331@S:7,79.966332@T:14	2729.14	683.292	2729.14	683.292	0.0023	4	46.1	0	Elution from: 55.957 to 55.957 scan no 5306 cid35.00 polarity:+:MA10:m1s	55.957	1	26	K	S
LAP2B_HUMAN	Lamina-associated polypeptide 2, isoforms beta/gamma OS=Homo sapiens GN=TMPO PE=1 SV=2	GPPDFSSDEEREPTPVLGSGAAAAGR	2 Label:13C(6)15N(4) (R);2 Phospho (ST)	10.008269@R:11,10.008269@R:26,79.966331@S:7,79.966332@T:14	2749.15	688.296	2749.15	688.296	-0.0001	4	39.7	4	Elution from: 56.016 to 56.016 scan no 5311 cid35.00 polarity:+:MA10:m1s	56.016	1	26	K	S
LAP2B_HUMAN	Lamina-associated polypeptide 2, isoforms beta/gamma OS=Homo sapiens GN=TMPO PE=1 SV=2	QNGSNDSDRYSDNEEDSKIELK	Label:13C(6)15N(4) (R);2 Label:2H(4) (K);Phospho (ST);Phospho (Y)	10.008269@R:9,4.025107@K:18,4.025107@K:22,79.966331@S:11,79.966331@Y:10	2720.1	907.707	2720.1	907.706	0.0025	3	38	12	Elution from: 42.367 to 42.367 scan no 3752 cid35.00 polarity:+:MA10:m1s	42.367	2	26	R	L
LAP2B_HUMAN	Lamina-associated polypeptide 2, isoforms beta/gamma OS=Homo sapiens GN=TMPO PE=1 SV=2	LREQGTESRSSTPLPTISSSAENTR	2 Phospho (ST)	79.966331@S:11,79.966332@T:12	2863.28	716.827	2863.28	716.826	0.0023	4	34.8	7	Elution from: 43.236 to 43.236 scan no 4032 cid35.00 polarity:+:MA10:m1s	43.236	2	26	K	Q
LAP2B_HUMAN	Lamina-associated polypeptide 2, isoforms beta/gamma OS=Homo sapiens GN=TMPO PE=1 SV=2	GPPDFSSDEEREPTPVLGSGAAAAGR	2 Phospho (ST)	79.966331@S:6,79.966332@T:14	2729.14	910.722	2729.14	910.72	0.0062	3	32.8	5.8	Elution from: 55.436 to 55.436 scan no 5325 cid35.00 polarity:+:MA10:m1s	55.436	1	26	K	S
LAP2B_HUMAN	Lamina-associated polypeptide 2, isoforms beta/gamma OS=Homo sapiens GN=TMPO PE=1 SV=2	QNGSNDSDRYSDNEEDSKIELK	2 Phospho (ST)	79.966331@S:4,79.966331@S:7	2702.04	901.688	2702.04	901.687	0.003	3	30.8	6.1	Elution from: 41.961 to 41.961 scan no 3855 cid35.00 polarity:+:MA10:m1s	41.961	2	26	R	L
LAP2B_HUMAN	Lamina-associated polypeptide 2, isoforms beta/gamma OS=Homo sapiens GN=TMPO PE=1 SV=2	LREQGTESRSSTPLPTISSSAENTR	2 Phospho (ST)	79.966331@S:8,79.966331@S:10	2863.28	716.826	2863.28	716.826	0.0014	4	30	4.2	Elution from: 42.765 to 42.765 scan no 3934 cid35.00 polarity:+:MA10:m1s	42.765	2	26	K	Q
LAP2B_HUMAN	Lamina-associated polypeptide 2, isoforms beta/gamma OS=Homo sapiens GN=TMPO PE=1 SV=2	QNGSNDSDRYSDNEEDSKIELK	Phospho (ST)	79.966331@S:11	2622.07	875.032	2622.07	875.031	0.0028	3	28.2	1.9	Elution from: 39.481 to 39.481 scan no 3518 cid35.00 polarity:+:MA10:m1s	39.481	2	26	R	L
LAP2B_HUMAN	Lamina-associated polypeptide 2, isoforms beta/gamma OS=Homo sapiens GN=TMPO PE=1 SV=2	QNGSNDSDRYSDNEEDSKIELK	Phospho (ST);Phospho (Y)	79.966331@S:11,79.966331@Y:10	2702.04	901.687	2702.04	901.687	0.0018	3	26.2	0.5	Elution from: 42.388 to 42.388 scan no 3927 cid35.00 polarity:+:MA10:m1s	42.388	2	26	R	L
LARP1_HUMAN	La-related protein 1 OS=Homo sapiens GN=LARP1 PE=1 SV=2	NTFTAWSDEESDYEIDDRDVNK	2 Phospho (ST)	79.966331@S:7,79.966331@S:11	2808.05	937.025	2808.05	937.023	0.0042	3	72.8	10.9	Elution from: 63.255 to 63.255 scan no 6040 cid35.00 polarity:+:MA10:m1s	63.255	1	26	K	I
LARP1_HUMAN	La-related protein 1 OS=Homo sapiens GN=LARP1 PE=1 SV=2	NTFTAWSDEESDYEIDDRDVNK	Phospho (ST);Phospho (Y)	79.966331@S:7,79.966331@Y:13	2808.05	937.024	2808.05	937.023	0.0028	3	61.8	1.1	Elution from: 63.044 to 63.044 scan no 5926 cid35.00 polarity:+:MA10:m1s	63.044	1	26	K	I
LARP1_HUMAN	La-related protein 1 OS=Homo sapiens GN=LARP1 PE=1 SV=2	NTFTAWSDEESDYEIDDRDVNK	Label:13C(6)15N(4) (R);Label:2H(4) (K);2 Phospho (ST)	10.008269@R:18,4.025107@K:22,79.966331@S:7,79.966331@S:11	2822.08	941.702	2822.08	941.701	0.0034	3	61.6	21.6	Elution from: 63.387 to 63.387 scan no 5957 cid35.00 polarity:+:MA10:m1s	63.387	1	26	K	I
LARP1_HUMAN	La-related protein 1 OS=Homo sapiens GN=LARP1 PE=1 SV=2	NTFTAWSDEESDYEIDDRDVNK	Label:13C(6)15N(4) (R);Label:2H(4) (K);Phospho (ST);Phospho (Y)	10.008269@R:18,4.025107@K:22,79.966331@S:7,79.966331@Y:13	2822.08	941.702	2822.08	941.701	0.0032	3	56.5	1.2	Elution from: 63.580 to 63.580 scan no 5947 cid35.00 polarity:+:MA10:m1s	63.58	1	25	K	I
LARP1_HUMAN	La-related protein 1 OS=Homo sapiens GN=LARP1 PE=1 SV=2	NTFTAWSDEESDYEIDDRDVNK	Phospho (ST)	79.966331@S:7	2728.08	910.369	2728.08	910.368	0.0026	3	48.2	7.6	Elution from: 61.361 to 61.361 scan no 5711 cid35.00 polarity:+:MA10:m1s	61.361	1	25	K	I
LARP1_HUMAN	La-related protein 1 OS=Homo sapiens GN=LARP1 PE=1 SV=2	NTFTAWSDEESDYEIDDRDVNK	Phospho (ST);Phospho (Y)	79.966332@T:4,79.966331@Y:13	2808.05	1405.03	2808.05	1405.03	0.0035	2	46.8	1.6	Elution from: 63.333 to 63.333 scan no 6048 cid35.00 polarity:+:MA10:m1s	63.333	1	26	K	I
LARP1_HUMAN	La-related protein 1 OS=Homo sapiens GN=LARP1 PE=1 SV=2	SLPTTVPESPNYR	Phospho (ST)	79.966331@S:9	1539.7	770.856	1539.7	770.856	0.0013	2	40.5	21.6	Elution from: 47.652 to 47.652 scan no 4393 cid35.00 polarity:+:MA10	47.652	0	26	R	N
LARP1_HUMAN	La-related protein 1 OS=Homo sapiens GN=LARP1 PE=1 SV=2	SLPTTVPESPNYR	Phospho (ST)	79.966331@S:1	1539.7	770.856	1539.7	770.856	0.0015	2	33.9	10.8	Elution from: 50.137 to 50.137 scan no 4797 cid35.00 polarity:+:MA10:m1s	50.137	0	26	R	N
LARP1_HUMAN	La-related protein 1 OS=Homo sapiens GN=LARP1 PE=1 SV=2	SLPTTVPESPNYR	Phospho (ST);Phospho (Y)	79.966331@S:1,79.966331@Y:12	1619.67	810.841	1619.66	810.839	0.0037	2	29	9.7	Elution from: 51.921 to 51.921 scan no 4861 cid35.00 polarity:+:MA10:m1s	51.921	0	26	R	N
LARP1_HUMAN	La-related protein 1 OS=Homo sapiens GN=LARP1 PE=1 SV=2	SLPTTVPESPNYR	Label:13C(6)15N(4) (R);2 Phospho (ST)	10.008269@R:13,79.966331@S:1,79.966331@S:9	1629.67	815.844	1629.67	815.843	0.0018	2	28.2	0.2	Elution from: 51.579 to 51.579 scan no 4782 cid35.00 polarity:+:MA10	51.579	0	25	R	N
LARP1_HUMAN	La-related protein 1 OS=Homo sapiens GN=LARP1 PE=1 SV=2	SLPTTVPESPNYR	2 Phospho (ST)	79.966331@S:1,79.966331@S:9	1619.66	810.839	1619.66	810.839	0.0007	2	27.8	6.3	Elution from: 51.530 to 51.530 scan no 4775 cid35.00 polarity:+:MA10	51.53	0	25	R	N
LARP1_HUMAN	La-related protein 1 OS=Homo sapiens GN=LARP1 PE=1 SV=2	SLPTTVPESPNYR	Label:13C(6)15N(4) (R);Phospho (ST);Phospho (Y)	10.008269@R:13,79.966331@S:1,79.966331@Y:12	1629.67	815.844	1629.67	815.843	0.0022	2	25.2	6.7	Elution from: 51.403 to 51.403 scan no 4875 cid35.00 polarity:+:MA10	51.403	0	25	R	N
LARP4_HUMAN	La-related protein 4 OS=Homo sapiens GN=LARP4 PE=1 SV=3	DGLNQTTIPVSPPSTTKPSR	Phospho (ST)	79.966331@S:11	2175.06	726.027	2175.06	726.026	0.001	3	54.5	12.1	Elution from: 49.450 to 49.450 scan no 4663 cid35.00 polarity:+:MA10:m1s	49.45	0	26	K	A
LARP7_HUMAN	La-related protein 7 OS=Homo sapiens GN=LARP7 PE=1 SV=1	RSRPTSEGSDIESTEPQK	2 Phospho (ST)	79.966331@S:6,79.966331@S:9	2162.89	721.97	2162.89	721.97	0.0011	3	67.3	10.9	Elution from: 32.114 to 32.114 scan no 2368 cid35.00 polarity:+:MA10	32.114	1	25	K	Q
LARP7_HUMAN	La-related protein 7 OS=Homo sapiens GN=LARP7 PE=1 SV=1	DIEISTEEEKDTGDLK	2 Phospho (ST)	79.966331@S:5,79.966332@T:6	1980.79	991.4	1980.79	991.4	0.0002	2	44.2	26.7	Elution from: 52.568 to 52.568 scan no 4890 cid35.00 polarity:+:MA10:m1s	52.568	1	25	R	D
LARP7_HUMAN	La-related protein 7 OS=Homo sapiens GN=LARP7 PE=1 SV=1	DIEISTEEEKDTGDLK	2 Label:2H(4) (K);2 Phospho (ST)	4.025107@K:10,4.025107@K:16,79.966331@S:5,79.966332@T:6	1988.84	995.426	1988.84	995.425	0.0014	2	42.3	28.5	Elution from: 52.347 to 52.347 scan no 4978 cid35.00 polarity:+:MA10:m1s	52.347	1	25	R	D
LARP7_HUMAN	La-related protein 7 OS=Homo sapiens GN=LARP7 PE=1 SV=1	SRPTSEGSDIESTEPQK	Phospho (ST)	79.966331@S:5	1926.82	643.281	1926.82	643.281	0.0011	3	30.4	0	Elution from: 32.187 to 32.187 scan no 2384 cid35.00 polarity:+:MA10	32.187	0	26	R	Q
LARP7_HUMAN	La-related protein 7 OS=Homo sapiens GN=LARP7 PE=1 SV=1	SRPTSEGSDIESTEPQKQCSKK	Carbamidomethyl (C);2 Label:2H(4) (K);3 Phospho (ST)	57.021465@C:19,4.025107@K:21,4.025107@K:22,79.966331@S:1,79.966332@T:4,79.966331@S:5	2726.12	682.538	2726.11	682.536	0.0073	4	27.8	9.7	Elution from: 59.385 to 59.385 scan no 5614 cid35.00 polarity:+:MA10:m1s	59.385	2	26	R	K
LAT4_HUMAN	Large neutral amino acids transporter small subunit 4 OS=Homo sapiens GN=SLC43A2 PE=1 SV=1	LCLSTVDLEVK	Carbamidomethyl (C);Phospho (ST)	57.021465@C:2,79.966331@S:4	1355.64	678.828	1355.64	678.828	0.0006	2	65.8	13.7	Elution from: 63.574 to 63.574 scan no 5971 cid35.00 polarity:+:MA10	63.574	0	26	K	C
LC7L3_HUMAN	Luc7-like protein 3 OS=Homo sapiens GN=LUC7L3 PE=1 SV=2	ESDTKNEVNGTSEDIKSEGDTQSN	Phospho (ST)	79.966331@S:23	2663.07	888.698	2663.07	888.698	0.0018	3	63.2	9.4	Elution from: 35.358 to 35.358 scan no 2930 cid35.00 polarity:+:MA10:m1s	35.358	2	26	K	-
LEMD2_HUMAN	LEM domain-containing protein 2 OS=Homo sapiens GN=LEMD2 PE=1 SV=1	WTKPSSFSDSER	Label:13C(6)15N(4) (R);Label:2H(4) (K);Phospho (ST)	10.008269@R:12,4.025107@K:3,79.966331@S:8	1519.65	507.558	1519.65	507.558	0.0001	3	31.6	8.5	Elution from: 40.969 to 40.969 scan no 3577 cid35.00 polarity:+:MA10	40.969	0	26	R	-
LEO1_HUMAN	RNA polymerase-associated protein LEO1 OS=Homo sapiens GN=LEO1 PE=1 SV=1	NAIASDSEADSDTEVPK	Label:2H(4) (K);3 Phospho (ST)	4.025107@K:17,79.966331@S:5,79.966331@S:7,79.966331@S:11	1991.7	996.858	1991.7	996.857	0.0017	2	62.1	3.5	Elution from: 44.804 to 44.804 scan no 4097 cid35.00 polarity:+:MA10:m1s	44.804	0	25	K	D
LEO1_HUMAN	RNA polymerase-associated protein LEO1 OS=Homo sapiens GN=LEO1 PE=1 SV=1	KYVISDEEEEDDD	Phospho (ST)	79.966331@S:5	1664.6	833.307	1664.6	833.306	0.0019	2	61	39.7	Elution from: 44.862 to 44.862 scan no 4027 cid35.00 polarity:+:MA10	44.862	1	26	K	-
LEO1_HUMAN	RNA polymerase-associated protein LEO1 OS=Homo sapiens GN=LEO1 PE=1 SV=1	YVISDEEEEDDD	Phospho (ST)	79.966331@S:4	1536.5	769.259	1536.5	769.259	0.0012	2	59	23.7	Elution from: 49.093 to 49.093 scan no 4560 cid35.00 polarity:+:MA10	49.093	0	26	K	-
LEO1_HUMAN	RNA polymerase-associated protein LEO1 OS=Homo sapiens GN=LEO1 PE=1 SV=1	KLTSDEEGEPSGK	Phospho (ST)	79.966331@S:4	1455.61	728.814	1455.61	728.814	0.0009	2	58	8.5	Elution from: 28.069 to 28.069 scan no 1908 cid35.00 polarity:+:MA10	28.069	1	26	K	R
LEO1_HUMAN	RNA polymerase-associated protein LEO1 OS=Homo sapiens GN=LEO1 PE=1 SV=1	NAIASDSEADSDTEVPK	3 Phospho (ST)	79.966331@S:5,79.966331@S:7,79.966331@S:11	1987.68	994.845	1987.67	994.844	0.0014	2	52.2	11.5	Elution from: 44.367 to 44.367 scan no 4125 cid35.00 polarity:+:MA10	44.367	0	26	K	D
LEO1_HUMAN	RNA polymerase-associated protein LEO1 OS=Homo sapiens GN=LEO1 PE=1 SV=1	KLTSDEEGEPSGK	2 Label:2H(4) (K);Phospho (ST)	4.025107@K:1,4.025107@K:13,79.966331@S:4	1463.66	732.839	1463.66	732.839	0.0008	2	51.7	7.7	Elution from: 28.133 to 28.133 scan no 1853 cid35.00 polarity:+:MA10	28.133	1	26	K	R
LEO1_HUMAN	RNA polymerase-associated protein LEO1 OS=Homo sapiens GN=LEO1 PE=1 SV=1	KYVISDEEEEDDD	Label:2H(4) (K);Phospho (ST)	4.025107@K:1,79.966331@S:5	1668.62	835.319	1668.62	835.319	0.0014	2	41.1	21.8	Elution from: 44.921 to 44.921 scan no 4114 cid35.00 polarity:+:MA10	44.921	1	25	K	-
LEO1_HUMAN	RNA polymerase-associated protein LEO1 OS=Homo sapiens GN=LEO1 PE=1 SV=1	NAIASDSEADSDTEVPK	Label:2H(4) (K);3 Phospho (ST)	4.025107@K:17,79.966331@S:5,79.966331@S:7,79.966332@T:13	1991.7	996.858	1991.7	996.857	0.0033	2	32.8	4.9	Elution from: 44.608 to 44.608 scan no 4176 cid35.00 polarity:+:MA10:m1s	44.608	0	26	K	D
LEO1_HUMAN	RNA polymerase-associated protein LEO1 OS=Homo sapiens GN=LEO1 PE=1 SV=1	NAIASDSEADSDTEVPK	3 Phospho (ST)	79.966331@S:5,79.966331@S:7,79.966332@T:13	1987.68	994.845	1987.67	994.844	0.0019	2	29.8	2.3	Elution from: 44.674 to 44.674 scan no 4180 cid35.00 polarity:+:MA10	44.674	0	26	K	D
LIMA1_HUMAN	LIM domain and actin-binding protein 1 OS=Homo sapiens GN=LIMA1 PE=1 SV=1	LRSPPEALVQGR	2 Label:13C(6)15N(4) (R);Phospho (ST)	10.008269@R:2,10.008269@R:12,79.966331@S:3	1421.73	474.917	1421.73	474.917	0.0002	3	48.9	36.5	Elution from: 42.058 to 42.058 scan no 3712 cid35.00 polarity:+:MA10	42.058	1	26	R	Y
LIMA1_HUMAN	LIM domain and actin-binding protein 1 OS=Homo sapiens GN=LIMA1 PE=1 SV=1	QWTSLSLR	Label:13C(6)15N(4) (R);Phospho (ST)	10.008269@R:8,79.966331@S:6	1079.5	540.759	1079.5	540.759	-0.0001	2	42.7	13	Elution from: 57.425 to 57.425 scan no 5357 cid35.00 polarity:+:MA10	57.425	0	25	R	V
LIMA1_HUMAN	LIM domain and actin-binding protein 1 OS=Homo sapiens GN=LIMA1 PE=1 SV=1	ETPHSPGVEDAPIAK	Label:2H(4) (K);Phospho (ST)	4.025107@K:15,79.966331@S:5	1630.75	544.592	1630.75	544.592	-0.0001	3	40.2	26.4	Elution from: 36.980 to 36.980 scan no 3160 cid35.00 polarity:+:MA10	36.98	0	26	R	V
LIMA1_HUMAN	LIM domain and actin-binding protein 1 OS=Homo sapiens GN=LIMA1 PE=1 SV=1	SEVQQPVHPKPLSPDSR	Label:13C(6)15N(4) (R);Label:2H(4) (K);Phospho (ST)	10.008269@R:17,4.025107@K:10,79.966331@S:13	1993.98	665.668	1993.98	665.667	0.0009	3	36.3	10	Elution from: 35.462 to 35.462 scan no 2981 cid35.00 polarity:+:MA10:m1s	35.462	0	26	K	A
LIMA1_HUMAN	LIM domain and actin-binding protein 1 OS=Homo sapiens GN=LIMA1 PE=1 SV=1	SEVQQPVHPKPLSPDSR	Phospho (ST)	79.966331@S:13	1979.95	660.99	1979.95	660.989	0.0021	3	32.8	14.3	Elution from: 35.365 to 35.365 scan no 2931 cid35.00 polarity:+:MA10:m1s	35.365	0	26	K	A
LIMA1_HUMAN	LIM domain and actin-binding protein 1 OS=Homo sapiens GN=LIMA1 PE=1 SV=1	ETPHSPGVEDAPIAK	Phospho (ST)	79.966331@S:5	1626.73	543.251	1626.73	543.25	0.001	3	31.9	7.5	Elution from: 37.130 to 37.130 scan no 3227 cid35.00 polarity:+:MA10	37.13	0	26	R	V
LIPA1_HUMAN	Liprin-alpha-1 OS=Homo sapiens GN=PPFIA1 PE=1 SV=1	RSSDGSLSHEEDLAK	Phospho (ST)	79.966331@S:3	1709.73	570.916	1709.73	570.916	0.001	3	29.4	8	Elution from: 34.449 to 34.449 scan no 2685 cid35.00 polarity:+:MA10	34.449	1	25	K	V
LMF1_HUMAN	Lipase maturation factor 1 OS=Homo sapiens GN=LMF1 PE=1 SV=1	RPDSPTMAAPAESLR	Phospho (ST)	79.966332@T:6	1677.75	420.445	1677.75	420.446	-0.0027	4	28.7	9.9	Elution from: 33.247 to 33.247 scan no 2643 cid35.00 polarity:+:MA10	33.247	0	25	M	R
LMNA_HUMAN	Prelamin-A/C OS=Homo sapiens GN=LMNA PE=1 SV=1	SVGGSGGGSFGDNLVTR	Phospho (ST)	79.966331@S:1	1645.71	823.863	1645.71	823.862	0.001	2	74.1	9.7	Elution from: 52.697 to 52.697 scan no 4917 cid35.00 polarity:+:MA10	52.697	0	25	R	S
LMNA_HUMAN	Prelamin-A/C OS=Homo sapiens GN=LMNA PE=1 SV=1	SVGGSGGGSFGDNLVTR	Phospho (ST)	79.966331@S:5	1645.71	823.863	1645.71	823.862	0.001	2	73.6	5.5	Elution from: 52.500 to 52.500 scan no 4994 cid35.00 polarity:+:MA10	52.5	0	25	R	S
LMNA_HUMAN	Prelamin-A/C OS=Homo sapiens GN=LMNA PE=1 SV=1	SGAQASSTPLSPTR	Phospho (ST)	79.966331@S:11	1438.65	720.331	1438.65	720.33	0.0012	2	65.7	16.7	Elution from: 33.197 to 33.197 scan no 2657 cid35.00 polarity:+:MA10	33.197	0	26	R	I
LMNA_HUMAN	Prelamin-A/C OS=Homo sapiens GN=LMNA PE=1 SV=1	SGAQASSTPLSPTR	Label:13C(6)15N(4) (R);Phospho (ST)	10.008269@R:14,79.966331@S:11	1448.65	725.334	1448.65	725.334	-0.0001	2	57.3	20.8	Elution from: 33.163 to 33.163 scan no 2562 cid35.00 polarity:+:MA10	33.163	0	25	R	I
LMNA_HUMAN	Prelamin-A/C OS=Homo sapiens GN=LMNA PE=1 SV=1	LRLSPSPTSQR	Phospho (ST)	79.966331@S:4	1320.66	661.335	1320.66	661.335	0.0008	2	56.4	9.8	Elution from: 37.066 to 37.066 scan no 3096 cid35.00 polarity:+:MA10	37.066	1	25	R	S
LMNA_HUMAN	Prelamin-A/C OS=Homo sapiens GN=LMNA PE=1 SV=1	LRLSPSPTSQR	2 Phospho (ST)	79.966331@S:4,79.966331@S:6	1400.62	701.318	1400.62	701.318	0.0011	2	40.5	5.5	Elution from: 39.049 to 39.049 scan no 3363 cid35.00 polarity:+:MA10	39.049	1	25	R	S
LMNA_HUMAN	Prelamin-A/C OS=Homo sapiens GN=LMNA PE=1 SV=1	LRLSPSPTSQR	2 Label:13C(6)15N(4) (R);Phospho (ST)	10.008269@R:2,10.008269@R:11,79.966331@S:4	1340.67	671.344	1340.67	671.343	0.0014	2	37.2	8.7	Elution from: 36.806 to 36.806 scan no 3039 cid35.00 polarity:+:MA10	36.806	1	26	R	S
LMNA_HUMAN	Prelamin-A/C OS=Homo sapiens GN=LMNA PE=1 SV=1	LRLSPSPTSQR	2 Phospho (ST)	79.966331@S:4,79.966331@S:9	1400.62	701.318	1400.62	701.318	0.001	2	31.1	3.8	Elution from: 38.695 to 38.695 scan no 3323 cid35.00 polarity:+:MA10	38.695	1	25	R	S
LMNA_HUMAN	Prelamin-A/C OS=Homo sapiens GN=LMNA PE=1 SV=1	LRLSPSPTSQR	Phospho (ST)	79.966331@S:6	1320.65	441.226	1320.66	441.226	0	3	30.3	4	Elution from: 37.334 to 37.334 scan no 3224 cid35.00 polarity:+:MA10	37.334	1	25	R	S
LMNA_HUMAN	Prelamin-A/C OS=Homo sapiens GN=LMNA PE=1 SV=1	SNEDQSMGNWQIK	Label:2H(4) (K);Oxidation (M);Phospho (ST)	4.025107@K:13,15.994915@M:7,79.966331@S:1	1635.66	818.835	1635.65	818.834	0.0021	2	27.8	20.7	Elution from: 45.913 to 45.913 scan no 4204 cid35.00 polarity:+:MA10	45.913	0	26	K	R
LMNA_HUMAN	Prelamin-A/C OS=Homo sapiens GN=LMNA PE=1 SV=1	LQLELSK	Phospho (ST)	79.966331@S:6	909.457	455.736	909.457	455.736	-0.0004	2	27.6	16.4	Elution from: 48.870 to 48.870 scan no 4530 cid35.00 polarity:+:MA10	48.87	0	25	R	V
LMNB1_HUMAN	Lamin-B1 OS=Homo sapiens GN=LMNB1 PE=1 SV=2	AGGPTTPLSPTR	2 Phospho (ST)	79.966332@T:6,79.966331@S:9	1313.54	657.779	1313.54	657.778	0.0009	2	48.1	17.4	Elution from: 36.348 to 36.348 scan no 3109 cid35.00 polarity:+:MA10	36.348	0	26	R	L
LMNB1_HUMAN	Lamin-B1 OS=Homo sapiens GN=LMNB1 PE=1 SV=2	LKLSPSPSSR	Label:13C(6)15N(4) (R);Label:2H(4) (K);Phospho (ST)	10.008269@R:10,4.025107@K:2,79.966331@S:4	1164.61	583.312	1164.61	583.311	0.0003	2	47.1	12.7	Elution from: 34.592 to 34.592 scan no 2855 cid35.00 polarity:+:MA10	34.592	1	26	R	V
LMNB1_HUMAN	Lamin-B1 OS=Homo sapiens GN=LMNB1 PE=1 SV=2	LKLSPSPSSR	Label:13C(6)15N(4) (R);Label:2H(4) (K);Phospho (ST)	10.008269@R:10,4.025107@K:2,79.966331@S:6	1164.61	389.21	1164.61	389.21	0.0008	3	42.5	8.5	Elution from: 34.865 to 34.865 scan no 2872 cid35.00 polarity:+:MA10:m1s	34.865	1	25	R	V
LMNB1_HUMAN	Lamin-B1 OS=Homo sapiens GN=LMNB1 PE=1 SV=2	LKLSPSPSSR	Label:13C(6)15N(4) (R);Label:2H(4) (K);2 Phospho (ST)	10.008269@R:10,4.025107@K:2,79.966331@S:4,79.966331@S:6	1244.58	623.295	1244.57	623.294	0.0006	2	39.6	18.6	Elution from: 36.901 to 36.901 scan no 3074 cid35.00 polarity:+:MA10	36.901	1	25	R	V
LMNB1_HUMAN	Lamin-B1 OS=Homo sapiens GN=LMNB1 PE=1 SV=2	AGGPTTPLSPTR	Label:13C(6)15N(4) (R);2 Phospho (ST)	10.008269@R:12,79.966332@T:6,79.966331@S:9	1323.55	662.783	1323.55	662.782	0.0003	2	35	9.6	Elution from: 36.245 to 36.245 scan no 2931 cid35.00 polarity:+:MA10	36.245	0	25	R	L
LMNB2_HUMAN	Lamin-B2 OS=Homo sapiens GN=LMNB2 PE=1 SV=3	LKLSPSPSSR	2 Phospho (ST)	79.966331@S:4,79.966331@S:6	1230.54	411.188	1230.54	411.188	-0.0001	3	33.9	11.2	Elution from: 37.312 to 37.312 scan no 3135 cid35.00 polarity:+:MA10	37.312	1	25	R	V
LMNB2_HUMAN	Lamin-B2 OS=Homo sapiens GN=LMNB2 PE=1 SV=3	LKLSPSPSSR	Phospho (ST)	79.966331@S:4	1150.58	576.295	1150.57	576.295	0.0006	2	32.8	5.9	Elution from: 35.108 to 35.108 scan no 2828 cid35.00 polarity:+:MA10	35.108	1	25	R	V
LMNB2_HUMAN	Lamin-B2 OS=Homo sapiens GN=LMNB2 PE=1 SV=3	AGGPATPLSPTR	2 Phospho (ST)	79.966332@T:6,79.966331@S:9	1283.53	642.773	1283.53	642.773	0.0009	2	32.2	14.1	Elution from: 35.610 to 35.610 scan no 2965 cid35.00 polarity:+:MA10	35.61	0	26	R	L
LMO7_HUMAN	LIM domain only protein 7 OS=Homo sapiens GN=LMO7 PE=1 SV=3	SMSDVSAEDVQNLR	Label:13C(6)15N(4) (R);Oxidation (M);Phospho (ST)	10.008269@R:14,15.994915@M:2,79.966331@S:1	1655.68	828.845	1655.67	828.844	0.0021	2	81.7	3	Elution from: 47.314 to 47.314 scan no 4302 cid35.00 polarity:+:MA10	47.314	0	25	K	Q
LMO7_HUMAN	LIM domain only protein 7 OS=Homo sapiens GN=LMO7 PE=1 SV=3	SRSTTELDDYSTNK	Phospho (ST)	79.966331@S:3	1695.7	848.857	1695.7	848.857	0.0012	2	75.2	12.9	Elution from: 36.099 to 36.099 scan no 3056 cid35.00 polarity:+:MA10	36.099	1	26	K	N
LMO7_HUMAN	LIM domain only protein 7 OS=Homo sapiens GN=LMO7 PE=1 SV=3	SMSDVSAEDVQNLR	Label:13C(6)15N(4) (R);Oxidation (M);Phospho (ST)	10.008269@R:14,15.994915@M:2,79.966331@S:3	1655.68	828.845	1655.67	828.844	0.0013	2	68.6	7.5	Elution from: 47.277 to 47.277 scan no 4305 cid35.00 polarity:+:MA10	47.277	0	26	K	Q
LMO7_HUMAN	LIM domain only protein 7 OS=Homo sapiens GN=LMO7 PE=1 SV=3	RGESLDNLDSPR	Phospho (ST)	79.966331@S:4	1437.63	719.821	1437.62	719.82	0.0017	2	38.3	26.9	Elution from: 39.504 to 39.504 scan no 3507 cid35.00 polarity:+:MA10	39.504	1	26	R	S
LMO7_HUMAN	LIM domain only protein 7 OS=Homo sapiens GN=LMO7 PE=1 SV=3	GISSLPR	Phospho (ST)	79.966331@S:4	808.384	405.199	808.384	405.199	-0.0002	2	36.8	13.7	Elution from: 41.124 to 41.124 scan no 3746 cid35.00 polarity:+:MA10	41.124	0	26	R	S
LMO7_HUMAN	LIM domain only protein 7 OS=Homo sapiens GN=LMO7 PE=1 SV=3	SRSTTELDDYSTNK	Phospho (ST)	79.966332@T:5	1695.7	566.241	1695.7	566.24	0.0011	3	30.1	4.6	Elution from: 36.404 to 36.404 scan no 3081 cid35.00 polarity:+:MA10	36.404	1	26	K	N
LRC41_HUMAN	Leucine-rich repeat-containing protein 41 OS=Homo sapiens GN=LRRC41 PE=1 SV=3	SPSAPAATSSASSSTSSYK	Label:2H(4) (K);Phospho (ST)	4.025107@K:19,79.966332@T:8	1856.8	465.206	1856.8	465.207	-0.0014	4	26.3	2.8	Elution from: 28.215 to 28.215 scan no 1867 cid35.00 polarity:+:MA10:m1s	28.215	0	25	R	R
LRC72_HUMAN	Leucine-rich repeat-containing protein 72 OS=Homo sapiens GN=LRRC72 PE=2 SV=2	AHIVQSIAFGGKVDASWDPK	2 Phospho (ST)	79.966331@S:6,79.966331@S:16	2285.02	572.263	2285.03	572.264	-0.0066	4	29.6	18.8	Elution from: 61.309 to 61.309 scan no 5704 cid35.00 polarity:+:MA10:m1s	61.309	1	25	K	S
LRC8A_HUMAN	Leucine-rich repeat-containing protein 8A OS=Homo sapiens GN=LRRC8A PE=1 SV=1	SRIEQGIVDR	Phospho (ST)	79.966331@S:1	1251.6	418.206	1251.6	418.206	-0.0007	3	42	30.1	Elution from: 35.807 to 35.807 scan no 2993 cid35.00 polarity:+:MA10	35.807	1	26	K	S
LRWD1_HUMAN	Leucine-rich repeat and WD repeat-containing protein 1 OS=Homo sapiens GN=LRWD1 PE=1 SV=2	RACASPSAQVEGSPVAGSDGSQPAVK	Carbamidomethyl (C);2 Phospho (ST)	57.021465@C:3,79.966331@S:7,79.966331@S:13	2672.13	891.718	2672.13	891.717	0.0009	3	61.5	2.7	Elution from: 38.002 to 38.002 scan no 3322 cid35.00 polarity:+:MA10:m1s	38.002	1	26	K	L
LRWD1_HUMAN	Leucine-rich repeat and WD repeat-containing protein 1 OS=Homo sapiens GN=LRWD1 PE=1 SV=2	RPDDVPLSLSPSK	Phospho (ST)	79.966331@S:10	1489.72	745.867	1489.72	745.866	0.0008	2	54.5	14.2	Elution from: 47.736 to 47.736 scan no 4471 cid35.00 polarity:+:MA10	47.736	0	26	K	R
LRWD1_HUMAN	Leucine-rich repeat and WD repeat-containing protein 1 OS=Homo sapiens GN=LRWD1 PE=1 SV=2	ANSPEKPPEAGAAHKPR	Label:13C(6)15N(4) (R);2 Label:2H(4) (K);Phospho (ST)	10.008269@R:17,4.025107@K:6,4.025107@K:15,79.966331@S:3	1853.93	464.489	1853.93	464.489	-0.0007	4	38.7	29.5	Elution from: 25.681 to 25.681 scan no 1573 cid35.00 polarity:+:MA10:m1s	25.681	0	25	K	A
LS14A_HUMAN	Protein LSM14 homolog A OS=Homo sapiens GN=LSM14A PE=1 SV=3	SPVSTRPLPSASQK	Label:13C(6)15N(4) (R);Label:2H(4) (K);Phospho (ST)	10.008269@R:6,4.025107@K:14,79.966331@S:1	1547.79	774.902	1547.79	774.902	0.0003	2	40.5	5.6	Elution from: 33.717 to 33.717 scan no 2713 cid35.00 polarity:+:MA10	33.717	0	25	R	A
LS14A_HUMAN	Protein LSM14 homolog A OS=Homo sapiens GN=LSM14A PE=1 SV=3	SPVSTRPLPSASQK	Label:13C(6)15N(4) (R);Label:2H(4) (K);Phospho (ST)	10.008269@R:6,4.025107@K:14,79.966331@S:4	1547.79	774.902	1547.79	774.902	0.0014	2	40.4	0.4	Elution from: 33.876 to 33.876 scan no 2665 cid35.00 polarity:+:MA10	33.876	0	25	R	A
LS14A_HUMAN	Protein LSM14 homolog A OS=Homo sapiens GN=LSM14A PE=1 SV=3	SSPQLDPLRK	Phospho (ST)	79.966331@S:2	1219.6	407.54	1219.6	407.539	0.0009	3	32.4	9.4	Elution from: 41.382 to 41.382 scan no 3764 cid35.00 polarity:+:MA10:m1s	41.382	1	26	R	S
LS14A_HUMAN	Protein LSM14 homolog A OS=Homo sapiens GN=LSM14A PE=1 SV=3	SPVSTRPLPSASQK	Phospho (ST)	79.966331@S:1	1533.76	767.885	1533.76	767.885	0.0007	2	31.1	12.5	Elution from: 33.230 to 33.230 scan no 2525 cid35.00 polarity:+:MA10	33.23	0	25	R	A
LS14A_HUMAN	Protein LSM14 homolog A OS=Homo sapiens GN=LSM14A PE=1 SV=3	TQLSQGRSSPQLDPLRK	2 Phospho (ST)	79.966331@S:4,79.966331@S:9	2069.97	690.997	2069.97	690.996	0.0022	3	28	0.9	Elution from: 45.505 to 45.505 scan no 4105 cid35.00 polarity:+:MA10:m1s	45.505	2	25	K	S
LSR_HUMAN	Lipolysis-stimulated lipoprotein receptor OS=Homo sapiens GN=LSR PE=1 SV=4	NLALSRESLVV	Label:13C(6)15N(4) (R);Phospho (ST)	10.008269@R:6,79.966331@S:5	1289.66	645.838	1289.66	645.838	0.0002	2	63	23.9	Elution from: 63.067 to 63.067 scan no 5877 cid35.00 polarity:+:MA10	63.067	1	25	K	-
LSR_HUMAN	Lipolysis-stimulated lipoprotein receptor OS=Homo sapiens GN=LSR PE=1 SV=4	NLALSRESLVV	2 Phospho (ST)	79.966331@S:5,79.966331@S:8	1359.62	680.818	1359.62	680.817	0.0008	2	47.7	37.5	Elution from: 66.050 to 66.050 scan no 6158 cid35.00 polarity:+:MA10	66.05	1	26	K	-
LSR_HUMAN	Lipolysis-stimulated lipoprotein receptor OS=Homo sapiens GN=LSR PE=1 SV=4	NLALSRESLVV	Label:13C(6)15N(4) (R);2 Phospho (ST)	10.008269@R:6,79.966331@S:5,79.966331@S:8	1369.63	685.822	1369.63	685.821	0.0011	2	47.4	35.6	Elution from: 66.358 to 66.358 scan no 6186 cid35.00 polarity:+:MA10	66.358	1	26	K	-
LSR_HUMAN	Lipolysis-stimulated lipoprotein receptor OS=Homo sapiens GN=LSR PE=1 SV=4	NLALSRESLVV	Label:13C(6)15N(4) (R);Phospho (ST)	10.008269@R:6,79.966331@S:8	1289.66	645.838	1289.66	645.838	0.0004	2	46.1	3.4	Elution from: 63.107 to 63.107 scan no 5831 cid35.00 polarity:+:MA10	63.107	1	25	K	-
LSR_HUMAN	Lipolysis-stimulated lipoprotein receptor OS=Homo sapiens GN=LSR PE=1 SV=4	NLALSRESLVV	Phospho (ST)	79.966331@S:5	1279.65	640.834	1279.65	640.834	0.0004	2	41.1	0	Elution from: 63.034 to 63.034 scan no 6020 cid35.00 polarity:+:MA10	63.034	1	26	K	-
LTOR1_HUMAN	Ragulator complex protein LAMTOR1 OS=Homo sapiens GN=LAMTOR1 PE=1 SV=2	TDEQALLSSILAK	Phospho (ST)	79.966331@S:9	1467.72	734.869	1467.72	734.868	0.0005	2	69.7	0.3	Elution from: 72.843 to 72.843 scan no 6718 cid35.00 polarity:+:MA10	72.843	0	26	R	T
LTOR1_HUMAN	Ragulator complex protein LAMTOR1 OS=Homo sapiens GN=LAMTOR1 PE=1 SV=2	LLLDPSSPPTK	Phospho (ST)	79.966331@S:7	1246.62	624.318	1246.62	624.318	0.0011	2	37.1	0	Elution from: 52.400 to 52.400 scan no 5038 cid35.00 polarity:+:MA10:m1s	52.4	0	26	K	A
LUZP1_HUMAN	Leucine zipper protein 1 OS=Homo sapiens GN=LUZP1 PE=1 SV=2	EKPDSDDDLDIASLVTAK	2 Label:2H(4) (K);Phospho (ST)	4.025107@K:2,4.025107@K:18,79.966331@S:5	2018.96	1010.49	2018.95	1010.48	0.0031	2	94.5	86.2	Elution from: 66.784 to 66.784 scan no 6226 cid35.00 polarity:+:MA10:m1s	66.784	0	26	R	L
LUZP1_HUMAN	Leucine zipper protein 1 OS=Homo sapiens GN=LUZP1 PE=1 SV=2	EKPDSDDDLDIASLVTAK	Phospho (ST)	79.966331@S:5	2010.9	671.309	2010.9	671.308	0.0012	3	55.7	47.7	Elution from: 66.324 to 66.324 scan no 6188 cid35.00 polarity:+:MA10	66.324	0	26	R	L
LV108_HUMAN	Ig lambda chain V-I region MEM OS=Homo sapiens PE=1 SV=1	QSVLTQPPSASGTPGGR	2 Phospho (ST)	79.966331@S:11,79.966332@T:13	1798.76	600.595	1798.77	600.596	-0.0012	3	31.4	10.7	Elution from: 23.707 to 23.707 scan no 1274 cid35.00 polarity:+:MA10	23.707	0	25	-	V
LYN_HUMAN	Tyrosine-protein kinase Lyn OS=Homo sapiens GN=LYN PE=1 SV=3	GKDSLSDDGVDLK	Phospho (ST)	79.966331@S:6	1427.62	476.88	1427.62	476.88	0.0004	3	43	2.2	Elution from: 43.190 to 43.190 scan no 4026 cid35.00 polarity:+:MA10	43.19	1	26	K	T
LYN_HUMAN	Tyrosine-protein kinase Lyn OS=Homo sapiens GN=LYN PE=1 SV=3	GKDSLSDDGVDLK	Phospho (ST)	79.966331@S:4	1427.62	476.88	1427.62	476.88	0.0001	3	39.6	3.4	Elution from: 43.157 to 43.157 scan no 3970 cid35.00 polarity:+:MA10	43.157	1	26	K	T
LYRIC_HUMAN	Protein LYRIC OS=Homo sapiens GN=MTDH PE=1 SV=2	SQEPIPDDQKVSDDDK	2 Label:2H(4) (K);Phospho (ST)	4.025107@K:10,4.025107@K:16,79.966331@S:12	1902.83	952.425	1902.83	952.424	0.0012	2	82.6	63.1	Elution from: 35.666 to 35.666 scan no 2909 cid35.00 polarity:+:MA10:m1s	35.666	1	25	K	E
LYRIC_HUMAN	Protein LYRIC OS=Homo sapiens GN=MTDH PE=1 SV=2	SQEPIPDDQKVSDDDK	Phospho (ST)	79.966331@S:12	1894.78	948.399	1894.78	948.399	0.0012	2	64.3	45.1	Elution from: 34.782 to 34.782 scan no 2862 cid35.00 polarity:+:MA10	34.782	1	26	K	E
LYRIC_HUMAN	Protein LYRIC OS=Homo sapiens GN=MTDH PE=1 SV=2	SQEPIPDDQKVSDDDKEK	3 Label:2H(4) (K);Phospho (ST)	4.025107@K:10,4.025107@K:16,4.025107@K:18,79.966331@S:12	2164	722.34	2164	722.339	0.0016	3	39.5	29.7	Elution from: 32.953 to 32.953 scan no 2493 cid35.00 polarity:+:MA10:m1s	32.953	2	26	K	G
LYRIC_HUMAN	Protein LYRIC OS=Homo sapiens GN=MTDH PE=1 SV=2	SQEPIPDDQKVSDDDKEK	Phospho (ST)	79.966331@S:12	2151.92	718.315	2151.92	718.314	0.0013	3	38.2	26.7	Elution from: 32.624 to 32.624 scan no 2556 cid35.00 polarity:+:MA10	32.624	2	26	K	G
LYRIC_HUMAN	Protein LYRIC OS=Homo sapiens GN=MTDH PE=1 SV=2	LSSQISAGEEK	Label:2H(4) (K);Phospho (ST)	4.025107@K:11,79.966331@S:6	1231.56	616.789	1231.56	616.789	0.0002	2	34.7	12.6	Elution from: 33.798 to 33.798 scan no 2613 cid35.00 polarity:+:MA10	33.798	0	26	K	W
M18BP_HUMAN	Mis18-binding protein 1 OS=Homo sapiens GN=MIS18BP1 PE=1 SV=1	NTSNIPVILEPETEESENEFYIK	Label:2H(4) (K);Phospho (ST);Phospho (Y)	4.025107@K:23,79.966331@S:16,79.966331@Y:21	2858.25	953.759	2858.25	953.757	0.0052	3	32.3	1.7	Elution from: 79.910 to 79.910 scan no 7166 cid35.00 polarity:+:MA10:m1s	79.91	0	26	R	Q
M18BP_HUMAN	Mis18-binding protein 1 OS=Homo sapiens GN=MIS18BP1 PE=1 SV=1	NTSNIPVILEPETEESENEFYIK	2 Phospho (ST)	79.966332@T:13,79.966331@S:16	2854.23	952.417	2854.22	952.415	0.0045	3	29.9	6.6	Elution from: 79.667 to 79.667 scan no 7274 cid35.00 polarity:+:MA10:m1s	79.667	0	25	R	Q
MAN1_HUMAN	Inner nuclear membrane protein Man1 OS=Homo sapiens GN=LEMD3 PE=1 SV=2	ENYSDSEEEDDDDVASSR	Phospho (ST);Phospho (Y)	79.966331@S:6,79.966331@Y:3	2220.69	1111.35	2220.69	1111.35	0.0017	2	63.6	4.4	Elution from: 38.992 to 38.992 scan no 3433 cid35.00 polarity:+:MA10:m1s	38.992	0	26	R	Q
MAN1_HUMAN	Inner nuclear membrane protein Man1 OS=Homo sapiens GN=LEMD3 PE=1 SV=2	VLLGFSSDESDVEASPR	Label:13C(6)15N(4) (R);Phospho (ST)	10.008269@R:17,79.966331@S:7	1896.84	949.426	1896.84	949.426	0	2	58.5	0.5	Elution from: 62.531 to 62.531 scan no 5817 cid35.00 polarity:+:MA10	62.531	0	25	K	D
MAN1_HUMAN	Inner nuclear membrane protein Man1 OS=Homo sapiens GN=LEMD3 PE=1 SV=2	VLLGFSSDESDVEASPR	Label:13C(6)15N(4) (R);Phospho (ST)	10.008269@R:17,79.966331@S:10	1896.84	949.427	1896.84	949.426	0.0009	2	53.1	7.6	Elution from: 62.512 to 62.512 scan no 5750 cid35.00 polarity:+:MA10	62.512	0	26	K	D
MAP4_HUMAN	Microtubule-associated protein 4 OS=Homo sapiens GN=MAP4 PE=1 SV=3	DGVLTLANNVTPAK	Phospho (ST)	79.966332@T:11	1491.73	746.875	1491.73	746.874	0.0013	2	75.1	36.2	Elution from: 55.399 to 55.399 scan no 5195 cid35.00 polarity:+:MA10	55.399	0	26	K	D
MAP4_HUMAN	Microtubule-associated protein 4 OS=Homo sapiens GN=MAP4 PE=1 SV=3	DMESPTKLDVTLAK	2 Label:2H(4) (K);Phospho (ST)	4.025107@K:7,4.025107@K:14,79.966331@S:4	1634.81	818.412	1634.81	818.411	0.0012	2	66.1	22.6	Elution from: 54.143 to 54.143 scan no 5206 cid35.00 polarity:+:MA10:m1s	54.143	1	26	K	D
MAP4_HUMAN	Microtubule-associated protein 4 OS=Homo sapiens GN=MAP4 PE=1 SV=3	DMESPTKLDVTLAK	Oxidation (M);Phospho (ST)	15.994915@M:2,79.966331@S:4	1642.75	822.384	1642.75	822.384	0.001	2	62.4	8.1	Elution from: 48.829 to 48.829 scan no 4482 cid35.00 polarity:+:MA10	48.829	1	25	K	D
MAP4_HUMAN	Microtubule-associated protein 4 OS=Homo sapiens GN=MAP4 PE=1 SV=3	DVTPPPETEVVLIK	Phospho (ST)	79.966332@T:3	1615.81	539.611	1615.81	539.611	0.0004	3	61.7	22.2	Elution from: 62.601 to 62.601 scan no 5762 cid35.00 polarity:+:MA10:m1s	62.601	0	26	K	N
MAP4_HUMAN	Microtubule-associated protein 4 OS=Homo sapiens GN=MAP4 PE=1 SV=3	DMESPTKLDVTLAK	Phospho (ST)	79.966331@S:4	1626.76	814.386	1626.76	814.386	0.0006	2	61.6	16.1	Elution from: 54.325 to 54.325 scan no 5096 cid35.00 polarity:+:MA10	54.325	1	26	K	D
MAP4_HUMAN	Microtubule-associated protein 4 OS=Homo sapiens GN=MAP4 PE=1 SV=3	EAQTLDSQIQETSI	Phospho (ST)	79.966331@S:13	1641.72	821.865	1641.71	821.864	0.0021	2	58	2.2	Elution from: 57.211 to 57.211 scan no 5312 cid35.00 polarity:+:MA10:m1s	57.211	0	26	R	-
MAP4_HUMAN	Microtubule-associated protein 4 OS=Homo sapiens GN=MAP4 PE=1 SV=3	DVTPPPETEVVLIK	Label:2H(4) (K);Phospho (ST)	4.025107@K:14,79.966332@T:3	1619.84	540.953	1619.84	540.953	0.0006	3	54	27.4	Elution from: 62.889 to 62.889 scan no 5883 cid35.00 polarity:+:MA10	62.889	0	25	K	N
MAP4_HUMAN	Microtubule-associated protein 4 OS=Homo sapiens GN=MAP4 PE=1 SV=3	DMESPTKLDVTLAK	Phospho (ST)	79.966332@T:6	1626.76	543.26	1626.76	543.26	-0.0003	3	48.2	0	Elution from: 54.573 to 54.573 scan no 5176 cid35.00 polarity:+:MA10	54.573	1	26	K	D
MAP4_HUMAN	Microtubule-associated protein 4 OS=Homo sapiens GN=MAP4 PE=1 SV=3	KCSLPAEEDSVLEK	Carbamidomethyl (C);Phospho (ST)	57.021465@C:2,79.966331@S:3	1683.74	562.256	1683.74	562.255	0.0024	3	45.6	36.5	Elution from: 46.481 to 46.481 scan no 4217 cid35.00 polarity:+:MA10:m1s	46.481	1	25	K	L
MAP4_HUMAN	Microtubule-associated protein 4 OS=Homo sapiens GN=MAP4 PE=1 SV=3	DMESPTKLDVTLAK	2 Label:2H(4) (K);Oxidation (M);Phospho (ST)	4.025107@K:7,4.025107@K:14,15.994915@M:2,79.966332@T:6	1650.8	551.275	1650.8	551.275	0.0005	3	45.2	9	Elution from: 48.715 to 48.715 scan no 4654 cid35.00 polarity:+:MA10	48.715	1	26	K	D
MAP4_HUMAN	Microtubule-associated protein 4 OS=Homo sapiens GN=MAP4 PE=1 SV=3	KCSLPAEEDSVLEK	Carbamidomethyl (C);2 Label:2H(4) (K);Phospho (ST)	57.021465@C:2,4.025107@K:1,4.025107@K:14,79.966331@S:3	1691.79	564.938	1691.79	564.938	0.0007	3	37	28.4	Elution from: 46.978 to 46.978 scan no 4395 cid35.00 polarity:+:MA10	46.978	1	25	K	L
MAP4_HUMAN	Microtubule-associated protein 4 OS=Homo sapiens GN=MAP4 PE=1 SV=3	DMESPTKLDVTLAK	Oxidation (M);Phospho (ST)	15.994915@M:2,79.966332@T:6	1642.75	548.592	1642.75	548.591	0.0007	3	36.1	0.7	Elution from: 48.746 to 48.746 scan no 4480 cid35.00 polarity:+:MA10	48.746	1	26	K	D
MAP4_HUMAN	Microtubule-associated protein 4 OS=Homo sapiens GN=MAP4 PE=1 SV=3	DMESPTKLDVTLAK	2 Label:2H(4) (K);Phospho (ST)	4.025107@K:7,4.025107@K:14,79.966332@T:6	1634.81	545.943	1634.81	545.943	0.001	3	35.4	1	Elution from: 54.102 to 54.102 scan no 5203 cid35.00 polarity:+:MA10	54.102	1	26	K	D
MARCS_HUMAN	Myristoylated alanine-rich C-kinase substrate OS=Homo sapiens GN=MARCKS PE=1 SV=4	GEAAAERPGEAAVASSPSK	Phospho (ST)	79.966331@S:16	1863.84	622.286	1863.84	622.286	0.0009	3	98.9	3.9	Elution from: 30.272 to 30.272 scan no 2135 cid35.00 polarity:+:MA10	30.272	0	26	K	A
MARCS_HUMAN	Myristoylated alanine-rich C-kinase substrate OS=Homo sapiens GN=MARCKS PE=1 SV=4	GEAAAERPGEAAVASSPSK	Label:13C(6)15N(4) (R);Label:2H(4) (K);Phospho (ST)	10.008269@R:7,4.025107@K:19,79.966331@S:16	1877.87	626.964	1877.87	626.964	0.0003	3	70.5	0.2	Elution from: 30.184 to 30.184 scan no 2116 cid35.00 polarity:+:MA10	30.184	0	25	K	A
MARCS_HUMAN	Myristoylated alanine-rich C-kinase substrate OS=Homo sapiens GN=MARCKS PE=1 SV=4	GEAAAERPGEAAVASSPSK	Label:13C(6)15N(4) (R);Label:2H(4) (K);Phospho (ST)	10.008269@R:7,4.025107@K:19,79.966331@S:15	1877.87	626.964	1877.87	626.964	0.0016	3	68.5	2.9	Elution from: 30.296 to 30.296 scan no 2127 cid35.00 polarity:+:MA10	30.296	0	26	K	A
MARCS_HUMAN	Myristoylated alanine-rich C-kinase substrate OS=Homo sapiens GN=MARCKS PE=1 SV=4	GEAAAERPGEAAVASSPSK	Phospho (ST)	79.966331@S:15	1863.84	622.287	1863.84	622.286	0.0018	3	66.9	1	Elution from: 30.094 to 30.094 scan no 2202 cid35.00 polarity:+:MA10	30.094	0	26	K	A
MARCS_HUMAN	Myristoylated alanine-rich C-kinase substrate OS=Homo sapiens GN=MARCKS PE=1 SV=4	GEPAAAAAPEAGASPVEK	Label:2H(4) (K);Phospho (ST)	4.025107@K:18,79.966331@S:14	1705.79	853.901	1705.79	853.9	0.0014	2	46.4	40.7	Elution from: 36.065 to 36.065 scan no 2960 cid35.00 polarity:+:MA10:m1s	36.065	0	25	K	E
MARCS_HUMAN	Myristoylated alanine-rich C-kinase substrate OS=Homo sapiens GN=MARCKS PE=1 SV=4	LSGFSFK	Label:2H(4) (K);Phospho (ST)	4.025107@K:7,79.966331@S:5	868.403	435.209	868.403	435.209	-0.0008	2	34.8	23.9	Elution from: 58.430 to 58.430 scan no 5519 cid35.00 polarity:+:MA10	58.43	0	25	K	K
MARCS_HUMAN	Myristoylated alanine-rich C-kinase substrate OS=Homo sapiens GN=MARCKS PE=1 SV=4	LSGFSFKK	Phospho (ST)	79.966331@S:5	992.473	497.244	992.473	497.244	0.0002	2	27.2	14.9	Elution from: 47.826 to 47.826 scan no 4415 cid35.00 polarity:+:MA10	47.826	1	26	K	N
MARCS_HUMAN	Myristoylated alanine-rich C-kinase substrate OS=Homo sapiens GN=MARCKS PE=1 SV=4	LSGFSFKK	2 Label:2H(4) (K);Phospho (ST)	4.025107@K:7,4.025107@K:8,79.966331@S:5	1000.52	501.269	1000.52	501.269	-0.0003	2	27.1	12.8	Elution from: 47.692 to 47.692 scan no 4540 cid35.00 polarity:+:MA10	47.692	1	26	K	N
MARCS_HUMAN	Myristoylated alanine-rich C-kinase substrate OS=Homo sapiens GN=MARCKS PE=1 SV=4	RFSFK	Phospho (ST)	79.966331@S:3	763.342	382.678	763.342	382.678	0.0002	2	21.1	5.2	Elution from: 38.714 to 38.714 scan no 3274 cid35.00 polarity:+:MA10	38.714	1	25	K	K
MARK2_HUMAN	Serine/threonine-protein kinase MARK2 OS=Homo sapiens GN=MARK2 PE=1 SV=2	SRNSPLLER	Phospho (ST)	79.966331@S:4	1150.55	384.524	1150.55	384.524	0	3	26.6	3.8	Elution from: 31.624 to 31.624 scan no 2430 cid35.00 polarity:+:MA10	31.624	1	26	R	A
MARK2_HUMAN	Serine/threonine-protein kinase MARK2 OS=Homo sapiens GN=MARK2 PE=1 SV=2	SRNSPLLER	Phospho (ST)	79.966331@S:1	1150.55	384.524	1150.55	384.524	0.0002	3	23.4	1.3	Elution from: 31.503 to 31.503 scan no 2391 cid35.00 polarity:+:MA10	31.503	1	26	R	A
MATR3_HUMAN	Matrin-3 OS=Homo sapiens GN=MATR3 PE=1 SV=2	RDSFDDRGPSLNPVLDYDHGSR	Phospho (ST)	79.966331@S:10	2597.13	650.29	2597.13	650.29	0.0009	4	57.3	11.8	Elution from: 54.451 to 54.451 scan no 5183 cid35.00 polarity:+:MA10:m1s	54.451	2	25	R	S
MATR3_HUMAN	Matrin-3 OS=Homo sapiens GN=MATR3 PE=1 SV=2	RDSFDDRGPSLNPVLDYDHGSR	Phospho (ST)	79.966331@S:3	2597.13	650.29	2597.13	650.29	0.0013	4	54.1	2.6	Elution from: 55.049 to 55.049 scan no 5211 cid35.00 polarity:+:MA10:m1s	55.049	2	26	R	S
MATR3_HUMAN	Matrin-3 OS=Homo sapiens GN=MATR3 PE=1 SV=2	RDSFDDRGPSLNPVLDYDHGSR	3 Label:13C(6)15N(4) (R);Phospho (ST)	10.008269@R:1,10.008269@R:7,10.008269@R:22,79.966331@S:3	2627.16	657.796	2627.15	657.796	0.0012	4	47.3	4	Elution from: 54.532 to 54.532 scan no 5174 cid35.00 polarity:+:MA10	54.532	2	26	R	S
MBB1A_HUMAN	Myb-binding protein 1A OS=Homo sapiens GN=MYBBP1A PE=1 SV=2	EIPSATQSPISK	Phospho (ST)	79.966331@S:8	1336.63	669.321	1336.63	669.321	0.0007	2	66.8	27.8	Elution from: 37.517 to 37.517 scan no 3238 cid35.00 polarity:+:MA10	37.517	0	26	K	K
MBB1A_HUMAN	Myb-binding protein 1A OS=Homo sapiens GN=MYBBP1A PE=1 SV=2	NQKPSQVNGAPGSPTEPAGQK	Phospho (ST)	79.966331@S:13	2171	724.674	2171	724.674	0.0006	3	55.6	5.7	Elution from: 29.485 to 29.485 scan no 2038 cid35.00 polarity:+:MA10:m1s	29.485	0	25	K	Q
MCAF1_HUMAN	Activating transcription factor 7-interacting protein 1 OS=Homo sapiens GN=ATF7IP PE=1 SV=3	RHEHPPNPPVSPGK	Phospho (ST)	79.966331@S:11	1627.76	407.948	1627.76	407.948	-0.0001	4	32.9	12.8	Elution from: 26.696 to 26.696 scan no 1646 cid35.00 polarity:+:MA10	26.696	1	26	K	T
MCM2_HUMAN	DNA replication licensing factor MCM2 OS=Homo sapiens GN=MCM2 PE=1 SV=4	GNDPLTSSPGR	Phospho (ST)	79.966331@S:8	1179.49	590.754	1179.49	590.753	0.0009	2	75.7	14.7	Elution from: 35.609 to 35.609 scan no 2845 cid35.00 polarity:+:MA10	35.609	0	25	R	S
MCM2_HUMAN	DNA replication licensing factor MCM2 OS=Homo sapiens GN=MCM2 PE=1 SV=4	RGLLYDSDEEDEERPAR	Phospho (ST)	79.966331@S:7	2128.91	710.643	2128.91	710.643	0.0018	3	66.5	6.5	Elution from: 44.253 to 44.253 scan no 3955 cid35.00 polarity:+:MA10	44.253	1	26	R	K
MCM2_HUMAN	DNA replication licensing factor MCM2 OS=Homo sapiens GN=MCM2 PE=1 SV=4	GLLYDSDEEDEERPAR	Phospho (ST)	79.966331@S:6	1972.81	987.41	1972.81	987.41	0.0014	2	62.1	37.1	Elution from: 48.537 to 48.537 scan no 4453 cid35.00 polarity:+:MA10	48.537	0	25	R	K
MCM2_HUMAN	DNA replication licensing factor MCM2 OS=Homo sapiens GN=MCM2 PE=1 SV=4	GNDPLTSSPGR	Label:13C(6)15N(4) (R);Phospho (ST)	10.008269@R:11,79.966331@S:8	1189.5	595.758	1189.5	595.757	0.0007	2	58.2	16	Elution from: 35.776 to 35.776 scan no 2925 cid35.00 polarity:+:MA10	35.776	0	25	R	S
MCM2_HUMAN	DNA replication licensing factor MCM2 OS=Homo sapiens GN=MCM2 PE=1 SV=4	GLLYDSDEEDEERPARK	Phospho (ST)	79.966331@S:6	2100.9	1051.46	2100.9	1051.46	0.0015	2	54.2	36.3	Elution from: 43.099 to 43.099 scan no 3837 cid35.00 polarity:+:MA10:m1s	43.099	1	26	R	R
MCM2_HUMAN	DNA replication licensing factor MCM2 OS=Homo sapiens GN=MCM2 PE=1 SV=4	GLLYDSDEEDEERPARK	2 Label:13C(6)15N(4) (R);Label:2H(4) (K);Phospho (ST)	10.008269@R:13,10.008269@R:16,4.025107@K:17,79.966331@S:6	2124.94	709.322	2124.94	709.321	0.0014	3	53.5	24.7	Elution from: 42.977 to 42.977 scan no 4002 cid35.00 polarity:+:MA10:m1s	42.977	1	26	R	R
MCM2_HUMAN	DNA replication licensing factor MCM2 OS=Homo sapiens GN=MCM2 PE=1 SV=4	GLLYDSDEEDEERPAR	2 Label:13C(6)15N(4) (R);Phospho (ST)	10.008269@R:13,10.008269@R:16,79.966331@S:6	1992.82	665.281	1992.82	665.281	0.0007	3	50.2	14.9	Elution from: 48.544 to 48.544 scan no 4454 cid35.00 polarity:+:MA10:m1s	48.544	0	25	R	K
MCM2_HUMAN	DNA replication licensing factor MCM2 OS=Homo sapiens GN=MCM2 PE=1 SV=4	RTDALTSSPGR	Phospho (ST)	79.966331@S:8	1239.56	620.788	1239.56	620.788	0.0004	2	49.9	8.7	Elution from: 27.590 to 27.590 scan no 1781 cid35.00 polarity:+:MA10	27.59	1	26	R	D
MCM2_HUMAN	DNA replication licensing factor MCM2 OS=Homo sapiens GN=MCM2 PE=1 SV=4	RGLLYDSDEEDEERPARK	Phospho (ST)	79.966331@S:7	2257	565.258	2257	565.258	0.001	4	49	20.6	Elution from: 39.868 to 39.868 scan no 3560 cid35.00 polarity:+:MA10	39.868	2	26	R	R
MCM2_HUMAN	DNA replication licensing factor MCM2 OS=Homo sapiens GN=MCM2 PE=1 SV=4	RGNDPLTSSPGR	2 Label:13C(6)15N(4) (R);Phospho (ST)	10.008269@R:1,10.008269@R:12,79.966331@S:9	1355.61	678.813	1355.61	678.812	0.0009	2	40.4	8.6	Elution from: 31.752 to 31.752 scan no 2320 cid35.00 polarity:+:MA10	31.752	1	26	R	S
MCM2_HUMAN	DNA replication licensing factor MCM2 OS=Homo sapiens GN=MCM2 PE=1 SV=4	RGNDPLTSSPGR	Phospho (ST)	79.966331@S:8	1335.59	446.205	1335.59	446.205	-0.0001	3	33.8	1.3	Elution from: 31.936 to 31.936 scan no 2348 cid35.00 polarity:+:MA10	31.936	1	26	R	S
MCM2_HUMAN	DNA replication licensing factor MCM2 OS=Homo sapiens GN=MCM2 PE=1 SV=4	RRGNDPLTSSPGR	Phospho (ST)	79.966331@S:10	1491.69	498.238	1491.69	498.239	-0.0006	3	33.5	0	Elution from: 28.211 to 28.211 scan no 1856 cid35.00 polarity:+:MA10	28.211	2	25	R	S
MCM2_HUMAN	DNA replication licensing factor MCM2 OS=Homo sapiens GN=MCM2 PE=1 SV=4	RRGNDPLTSSPGR	Phospho (ST)	79.966331@S:9	1491.7	746.855	1491.69	746.854	0.0008	2	33.2	5.1	Elution from: 28.282 to 28.282 scan no 1873 cid35.00 polarity:+:MA10	28.282	2	26	R	S
MCM2_HUMAN	DNA replication licensing factor MCM2 OS=Homo sapiens GN=MCM2 PE=1 SV=4	RGNDPLTSSPGR	2 Phospho (ST)	79.966331@S:8,79.966331@S:9	1415.56	708.788	1415.56	708.787	0.0009	2	32.2	0	Elution from: 35.721 to 35.721 scan no 2866 cid35.00 polarity:+:MA10	35.721	1	26	R	S
MCM2_HUMAN	DNA replication licensing factor MCM2 OS=Homo sapiens GN=MCM2 PE=1 SV=4	RGNDPLTSSPGR	2 Phospho (ST)	79.966332@T:7,79.966331@S:9	1415.56	708.787	1415.56	708.787	0.0007	2	32	2.7	Elution from: 35.501 to 35.501 scan no 2830 cid35.00 polarity:+:MA10	35.501	1	25	R	S
MCM2_HUMAN	DNA replication licensing factor MCM2 OS=Homo sapiens GN=MCM2 PE=1 SV=4	RGNDPLTSSPGR	Phospho (ST)	79.966331@S:9	1335.59	446.205	1335.59	446.205	0.0001	3	27.2	3.4	Elution from: 31.656 to 31.656 scan no 2307 cid35.00 polarity:+:MA10	31.656	1	26	R	S
MCM2_HUMAN	DNA replication licensing factor MCM2 OS=Homo sapiens GN=MCM2 PE=1 SV=4	RRGNDPLTSSPGR	3 Phospho (ST)	79.966332@T:8,79.966331@S:9,79.966331@S:10	1651.63	551.55	1651.63	551.55	0.0005	3	22	11.1	Elution from: 36.019 to 36.019 scan no 2926 cid35.00 polarity:+:MA10	36.019	2	26	R	S
MCM3_HUMAN	DNA replication licensing factor MCM3 OS=Homo sapiens GN=MCM3 PE=1 SV=3	DGDSYDPYDFSDTEEEMPQVHTPK	2 Phospho (ST)	79.966331@S:11,79.966332@T:22	2961.07	988.029	2961.06	988.028	0.0039	3	89.3	18.8	Elution from: 66.899 to 66.899 scan no 6241 cid35.00 polarity:+:MA10:m1s	66.899	0	26	K	T
MCM3_HUMAN	DNA replication licensing factor MCM3 OS=Homo sapiens GN=MCM3 PE=1 SV=3	DGDSYDPYDFSDTEEEMPQVHTPK	Oxidation (M);2 Phospho (ST)	15.994915@M:17,79.966331@S:11,79.966332@T:22	2977.06	993.361	2977.06	993.359	0.0047	3	85.2	28.7	Elution from: 59.767 to 59.767 scan no 5571 cid35.00 polarity:+:MA10:m1s	59.767	0	25	K	T
MCM3_HUMAN	DNA replication licensing factor MCM3 OS=Homo sapiens GN=MCM3 PE=1 SV=3	DGDSYDPYDFSDTEEEMPQVHTPK	Phospho (ST)	79.966331@S:11	2881.1	961.373	2881.09	961.372	0.0032	3	78.3	20.1	Elution from: 64.561 to 64.561 scan no 6005 cid35.00 polarity:+:MA10:m1s	64.561	0	25	K	T
MCM3_HUMAN	DNA replication licensing factor MCM3 OS=Homo sapiens GN=MCM3 PE=1 SV=3	DGDSYDPYDFSDTEEEMPQVHTPK	Oxidation (M);Phospho (ST)	15.994915@M:17,79.966331@S:11	2897.09	966.705	2897.09	966.704	0.0023	3	74.3	12.9	Elution from: 57.563 to 57.563 scan no 5396 cid35.00 polarity:+:MA10:m1s	57.563	0	26	K	T
MCM3_HUMAN	DNA replication licensing factor MCM3 OS=Homo sapiens GN=MCM3 PE=1 SV=3	DGDSYDPYDFSDTEEEMPQVHTPK	2 Phospho (ST)	79.966331@S:11,79.966332@T:13	2961.07	988.029	2961.06	988.028	0.005	3	73.9	29.1	Elution from: 64.294 to 64.294 scan no 6010 cid35.00 polarity:+:MA10:m1s	64.294	0	26	K	T
MCM3_HUMAN	DNA replication licensing factor MCM3 OS=Homo sapiens GN=MCM3 PE=1 SV=3	DGDSYDPYDFSDTEEEMPQVHTPK	3 Phospho (ST)	79.966331@S:11,79.966332@T:13,79.966332@T:22	3041.03	1014.68	3041.03	1014.68	0.0037	3	58.9	15.3	Elution from: 66.716 to 66.716 scan no 6217 cid35.00 polarity:+:MA10:m1s	66.716	0	26	K	T
MCM3_HUMAN	DNA replication licensing factor MCM3 OS=Homo sapiens GN=MCM3 PE=1 SV=3	DGDSYDPYDFSDTEEEMPQVHTPK	Label:2H(4) (K);Oxidation (M);2 Phospho (ST)	4.025107@K:24,15.994915@M:17,79.966331@S:11,79.966332@T:22	2981.09	994.703	2981.08	994.701	0.0052	3	56.2	9.7	Elution from: 59.625 to 59.625 scan no 5667 cid35.00 polarity:+:MA10:m1s	59.625	0	25	K	T
MCM3_HUMAN	DNA replication licensing factor MCM3 OS=Homo sapiens GN=MCM3 PE=1 SV=3	DGDSYDPYDFSDTEEEMPQVHTPK	Oxidation (M);3 Phospho (ST)	15.994915@M:17,79.966331@S:11,79.966332@T:13,79.966332@T:22	3057.03	1020.02	3057.02	1020.01	0.0039	3	51.1	9	Elution from: 61.111 to 61.111 scan no 5689 cid35.00 polarity:+:MA10:m1s	61.111	0	25	K	T
MCM3_HUMAN	DNA replication licensing factor MCM3 OS=Homo sapiens GN=MCM3 PE=1 SV=3	RSEDESETEDEEEKSQEDQEQK	2 Phospho (ST)	79.966331@S:6,79.966332@T:8	2843.02	948.681	2843.02	948.68	0.0027	3	40.1	7.8	Elution from: 28.515 to 28.515 scan no 1901 cid35.00 polarity:+:MA10:m1s	28.515	2	26	K	R
MCM3_HUMAN	DNA replication licensing factor MCM3 OS=Homo sapiens GN=MCM3 PE=1 SV=3	RSEDESETEDEEEKSQEDQEQK	Phospho (ST)	79.966331@S:6	2763.05	922.025	2763.05	922.024	0.001	3	31.9	5.4	Elution from: 29.862 to 29.862 scan no 2077 cid35.00 polarity:+:MA10:m1s	29.862	2	26	K	R
MCM4_HUMAN	DNA replication licensing factor MCM4 OS=Homo sapiens GN=MCM4 PE=1 SV=5	GLQVDLQSDGAAAEDIVASEQSLGQK	Phospho (ST)	79.966331@S:8	2708.26	903.76	2708.25	903.759	0.0028	3	94.7	71.3	Elution from: 73.508 to 73.508 scan no 6709 cid35.00 polarity:+:MA10:m1s	73.508	0	26	K	L
MCM6_HUMAN	DNA replication licensing factor MCM6 OS=Homo sapiens GN=MCM6 PE=1 SV=1	EIESEIDSEEELINK	Phospho (ST)	79.966331@S:8	1855.8	928.907	1855.8	928.906	0.0011	2	36.3	13.7	Elution from: 59.598 to 59.598 scan no 5577 cid35.00 polarity:+:MA10	59.598	0	26	K	K
MCRS1_HUMAN	Microspherule protein 1 OS=Homo sapiens GN=MCRS1 PE=1 SV=1	GDQVLNFSDAEDLIDDSK	Phospho (ST)	79.966331@S:8	2059.86	1030.94	2059.86	1030.94	0.0021	2	103.5	90.6	Elution from: 79.624 to 79.624 scan no 7162 cid35.00 polarity:+:MA10	79.624	0	26	K	L
MCRS1_HUMAN	Microspherule protein 1 OS=Homo sapiens GN=MCRS1 PE=1 SV=1	GDQVLNFSDAEDLIDDSK	Label:2H(4) (K);Phospho (ST)	4.025107@K:18,79.966331@S:8	2063.89	1032.95	2063.89	1032.95	0.0022	2	94.3	69.9	Elution from: 79.953 to 79.953 scan no 7223 cid35.00 polarity:+:MA10:m1s	79.953	0	25	K	L
MDC1_HUMAN	Mediator of DNA damage checkpoint protein 1 OS=Homo sapiens GN=MDC1 PE=1 SV=3	SQTTTERDSDTDVEEEELPVENR	Phospho (ST)	79.966332@T:11	2758.15	920.39	2758.15	920.389	0.0027	3	79.2	0	Elution from: 46.905 to 46.905 scan no 4301 cid35.00 polarity:+:MA10:m1s	46.905	1	26	R	E
MDC1_HUMAN	Mediator of DNA damage checkpoint protein 1 OS=Homo sapiens GN=MDC1 PE=1 SV=3	GPGAPGLAHLQESQAGSDTDVEEGK	Label:2H(4) (K);Phospho (ST)	4.025107@K:25,79.966331@S:17	2533.13	845.384	2533.13	845.383	0.0036	3	77.7	8.5	Elution from: 47.048 to 47.048 scan no 4315 cid35.00 polarity:+:MA10:m1s	47.048	0	25	R	A
MDC1_HUMAN	Mediator of DNA damage checkpoint protein 1 OS=Homo sapiens GN=MDC1 PE=1 SV=3	SQTTTERDSDTDVEEEELPVENR	2 Phospho (ST)	79.966332@T:5,79.966332@T:11	2838.12	947.046	2838.11	947.045	0.0039	3	62.6	2.5	Elution from: 48.813 to 48.813 scan no 4524 cid35.00 polarity:+:MA10:m1s	48.813	1	26	R	E
MDC1_HUMAN	Mediator of DNA damage checkpoint protein 1 OS=Homo sapiens GN=MDC1 PE=1 SV=3	SQTTTERDSDTDVEEEELPVENR	2 Phospho (ST)	79.966332@T:5,79.966331@S:9	2838.11	947.045	2838.11	947.045	0.0011	3	61.4	0	Elution from: 48.717 to 48.717 scan no 4564 cid35.00 polarity:+:MA10:m1s	48.717	1	25	R	E
MDC1_HUMAN	Mediator of DNA damage checkpoint protein 1 OS=Homo sapiens GN=MDC1 PE=1 SV=3	SQTTTERDSDTDVEEEELPVENR	2 Phospho (ST)	79.966331@S:9,79.966332@T:11	2838.11	947.046	2838.11	947.045	0.0034	3	60.4	0.6	Elution from: 48.691 to 48.691 scan no 4467 cid35.00 polarity:+:MA10:m1s	48.691	1	25	R	E
MDC1_HUMAN	Mediator of DNA damage checkpoint protein 1 OS=Homo sapiens GN=MDC1 PE=1 SV=3	SQTTTERDSDTDVEEEELPVENR	2 Label:13C(6)15N(4) (R);2 Phospho (ST)	10.008269@R:7,10.008269@R:23,79.966332@T:5,79.966332@T:11	2858.13	953.718	2858.13	953.717	0.0026	3	51.6	0	Elution from: 48.646 to 48.646 scan no 4573 cid35.00 polarity:+:MA10:m1s	48.646	1	26	R	E
MDC1_HUMAN	Mediator of DNA damage checkpoint protein 1 OS=Homo sapiens GN=MDC1 PE=1 SV=3	SQTTTERDSDTDVEEEELPVENR	2 Label:13C(6)15N(4) (R);2 Phospho (ST)	10.008269@R:7,10.008269@R:23,79.966331@S:9,79.966332@T:11	2858.13	953.718	2858.13	953.717	0.0041	3	49.9	0	Elution from: 48.208 to 48.208 scan no 4546 cid35.00 polarity:+:MA10:m1s	48.208	1	26	R	E
MDC1_HUMAN	Mediator of DNA damage checkpoint protein 1 OS=Homo sapiens GN=MDC1 PE=1 SV=3	SQTTTERDSDTDVEEEELPVENR	2 Phospho (ST)	79.966332@T:3,79.966332@T:4	2838.11	947.046	2838.11	947.045	0.0033	3	48.6	1.2	Elution from: 48.302 to 48.302 scan no 4555 cid35.00 polarity:+:MA10:m1s	48.302	1	26	R	E
MDC1_HUMAN	Mediator of DNA damage checkpoint protein 1 OS=Homo sapiens GN=MDC1 PE=1 SV=3	SQTTTERDSDTDVEEEELPVENR	2 Label:13C(6)15N(4) (R);2 Phospho (ST)	10.008269@R:7,10.008269@R:23,79.966332@T:5,79.966331@S:9	2858.13	953.718	2858.13	953.717	0.0054	3	43.3	0	Elution from: 48.531 to 48.531 scan no 4635 cid35.00 polarity:+:MA10:m1s	48.531	1	26	R	E
MDC1_HUMAN	Mediator of DNA damage checkpoint protein 1 OS=Homo sapiens GN=MDC1 PE=1 SV=3	GPGAPGLAHLQESQAGSDTDVEEGK	Label:2H(4) (K);2 Phospho (ST)	4.025107@K:25,79.966331@S:17,79.966332@T:19	2613.1	872.039	2613.09	872.038	0.0022	3	40.6	11.2	Elution from: 49.365 to 49.365 scan no 4583 cid35.00 polarity:+:MA10:m1s	49.365	0	25	R	A
MDC1_HUMAN	Mediator of DNA damage checkpoint protein 1 OS=Homo sapiens GN=MDC1 PE=1 SV=3	SQTTTERDSDTDVEEEELPVENR	2 Phospho (ST)	79.966332@T:3,79.966332@T:11	2838.11	947.045	2838.11	947.045	0.0027	3	28.5	0.9	Elution from: 49.105 to 49.105 scan no 4519 cid35.00 polarity:+:MA10:m1s	49.105	1	25	R	E
MDN1_HUMAN	Midasin OS=Homo sapiens GN=MDN1 PE=1 SV=2	MHDGELEEQEEDDEKSDSEGGDLDK	Oxidation (M);2 Phospho (ST)	15.994915@M:1,79.966331@S:16,79.966331@S:18	3011.05	1004.69	3011.04	1004.69	0.0026	3	50.9	45	Elution from: 39.361 to 39.361 scan no 3486 cid35.00 polarity:+:MA10:m1s	39.361	1	26	K	H
MECP2_HUMAN	Methyl-CpG-binding protein 2 OS=Homo sapiens GN=MECP2 PE=1 SV=1	AETSEGSGSAPAVPEASASPK	Label:2H(4) (K);Phospho (ST)	4.025107@K:21,79.966331@S:19	2012.89	1007.45	2012.89	1007.45	0.0021	2	66.8	12.8	Elution from: 37.610 to 37.610 scan no 3134 cid35.00 polarity:+:MA10:m1s	37.61	0	26	K	Q
MECP2_HUMAN	Methyl-CpG-binding protein 2 OS=Homo sapiens GN=MECP2 PE=1 SV=1	AETSEGSGSAPAVPEASASPK	Phospho (ST)	79.966331@S:19	2008.86	1005.44	2008.86	1005.44	0.0007	2	60.9	11.9	Elution from: 37.667 to 37.667 scan no 3183 cid35.00 polarity:+:MA10:m1s	37.667	0	25	K	Q
MED1_HUMAN	Mediator of RNA polymerase II transcription subunit 1 OS=Homo sapiens GN=MED1 PE=1 SV=4	SYQNSPSSDDGIRPLPEYSTEK	2 Phospho (ST)	79.966331@S:5,79.966331@S:8	2629.06	877.362	2629.06	877.361	0.0015	3	58.3	1.7	Elution from: 54.172 to 54.172 scan no 5144 cid35.00 polarity:+:MA10:m1s	54.172	0	26	K	H
MED1_HUMAN	Mediator of RNA polymerase II transcription subunit 1 OS=Homo sapiens GN=MED1 PE=1 SV=4	SYQNSPSSDDGIRPLPEYSTEK	2 Phospho (ST)	79.966331@S:7,79.966331@S:8	2629.06	877.362	2629.06	877.361	0.0025	3	32.2	1.8	Elution from: 53.612 to 53.612 scan no 5096 cid35.00 polarity:+:MA10:m1s	53.612	0	26	K	H
MED19_HUMAN	Mediator of RNA polymerase II transcription subunit 19 OS=Homo sapiens GN=MED19 PE=1 SV=2	NRHSPDHPGMGSSQASSSSSLR	Oxidation (M);Phospho (ST)	15.994915@M:10,79.966331@S:4	2376.99	595.254	2376.99	595.254	0.0017	4	30.9	11.5	Elution from: 25.588 to 25.588 scan no 1582 cid35.00 polarity:+:MA10:m1s	25.588	1	26	K	-
MEPCE_HUMAN	7SK snRNA methylphosphate capping enzyme OS=Homo sapiens GN=MEPCE PE=1 SV=1	TLNAETPKSSPLPAK	2 Phospho (ST)	79.966332@T:6,79.966331@S:9	1712.78	857.397	1712.78	857.397	-0.0001	2	48.1	4.8	Elution from: 36.951 to 36.951 scan no 3156 cid35.00 polarity:+:MA10	36.951	1	26	R	G
MEPCE_HUMAN	7SK snRNA methylphosphate capping enzyme OS=Homo sapiens GN=MEPCE PE=1 SV=1	TLNAETPKSSPLPAK	2 Phospho (ST)	79.966332@T:6,79.966331@S:10	1712.78	857.397	1712.78	857.397	0	2	38	0.7	Elution from: 37.103 to 37.103 scan no 3223 cid35.00 polarity:+:MA10	37.103	1	26	R	G
MFAP1_HUMAN	Microfibrillar-associated protein 1 OS=Homo sapiens GN=MFAP1 PE=1 SV=2	RSLAALDALNTDDENDEEEYEAWK	Phospho (ST)	79.966332@T:11	2876.21	959.743	2876.2	959.741	0.0039	3	117.1	59.3	Elution from: 66.581 to 66.581 scan no 6205 cid35.00 polarity:+:MA10:m1s	66.581	1	26	K	V
MFAP1_HUMAN	Microfibrillar-associated protein 1 OS=Homo sapiens GN=MFAP1 PE=1 SV=2	SLAALDALNTDDENDEEEYEAWK	Phospho (ST)	79.966332@T:10	2720.1	1361.06	2720.1	1361.06	0.003	2	116.2	42.5	Elution from: 73.009 to 73.009 scan no 6734 cid35.00 polarity:+:MA10:m1s	73.009	0	25	R	V
MFAP1_HUMAN	Microfibrillar-associated protein 1 OS=Homo sapiens GN=MFAP1 PE=1 SV=2	RSLAALDALNTDDENDEEEYEAWK	Label:13C(6)15N(4) (R);Label:2H(4) (K);Phospho (ST)	10.008269@R:1,4.025107@K:24,79.966332@T:11	2890.24	964.42	2890.24	964.419	0.0035	3	105.3	54.5	Elution from: 66.258 to 66.258 scan no 6250 cid35.00 polarity:+:MA10:m1s	66.258	1	25	K	V
MFAP1_HUMAN	Microfibrillar-associated protein 1 OS=Homo sapiens GN=MFAP1 PE=1 SV=2	IVEPEVVGESDSEVEGDAWR	2 Phospho (ST)	79.966331@S:10,79.966331@S:12	2360.95	1181.48	2360.95	1181.48	0.0032	2	88	73.7	Elution from: 65.553 to 65.553 scan no 6042 cid35.00 polarity:+:MA10:m1s	65.553	0	25	K	M
MFAP1_HUMAN	Microfibrillar-associated protein 1 OS=Homo sapiens GN=MFAP1 PE=1 SV=2	IVEPEVVGESDSEVEGDAWR	Label:13C(6)15N(4) (R);2 Phospho (ST)	10.008269@R:20,79.966331@S:10,79.966331@S:12	2370.96	1186.49	2370.95	1186.48	0.0046	2	82.4	75.6	Elution from: 65.400 to 65.400 scan no 6114 cid35.00 polarity:+:MA10:m1s	65.4	0	26	K	M
MFAP1_HUMAN	Microfibrillar-associated protein 1 OS=Homo sapiens GN=MFAP1 PE=1 SV=2	SLAALDALNTDDENDEEEYEAWK	Label:2H(4) (K);Phospho (ST)	4.025107@K:23,79.966332@T:10	2724.13	909.049	2724.13	909.049	0.0002	3	77.2	37.5	Elution from: 72.621 to 72.621 scan no 6641 cid35.00 polarity:+:MA10:m1s	72.621	0	26	R	V
MFAP1_HUMAN	Microfibrillar-associated protein 1 OS=Homo sapiens GN=MFAP1 PE=1 SV=2	RPDYAPMESSDEEDEEFQFIK	Label:13C(6)15N(4) (R);Label:2H(4) (K);Oxidation (M);2 Phospho (ST)	10.008269@R:1,4.025107@K:21,15.994915@M:7,79.966331@S:9,79.966331@S:10	2751.05	918.025	2751.05	918.024	0.0033	3	72.7	33	Elution from: 66.824 to 66.824 scan no 6231 cid35.00 polarity:+:MA10:m1s	66.824	0	26	K	K
MFAP1_HUMAN	Microfibrillar-associated protein 1 OS=Homo sapiens GN=MFAP1 PE=1 SV=2	MEREDSSEEEEEEIDDEEIER	Oxidation (M);2 Phospho (ST)	15.994915@M:1,79.966331@S:6,79.966331@S:7	2801.96	934.995	2801.96	934.995	0.0021	3	65.2	58.3	Elution from: 48.923 to 48.923 scan no 4593 cid35.00 polarity:+:MA10:m1s	48.923	1	25	R	R
MFAP1_HUMAN	Microfibrillar-associated protein 1 OS=Homo sapiens GN=MFAP1 PE=1 SV=2	RPDYAPMESSDEEDEEFQFIK	Oxidation (M);2 Phospho (ST)	15.994915@M:7,79.966331@S:9,79.966331@S:10	2737.02	913.348	2737.02	913.347	0.0038	3	58.1	20.2	Elution from: 66.668 to 66.668 scan no 6216 cid35.00 polarity:+:MA10:m1s	66.668	0	26	K	K
MFAP1_HUMAN	Microfibrillar-associated protein 1 OS=Homo sapiens GN=MFAP1 PE=1 SV=2	RPDYAPMESSDEEDEEFQFIK	Label:13C(6)15N(4) (R);Label:2H(4) (K);2 Phospho (ST)	10.008269@R:1,4.025107@K:21,79.966331@S:9,79.966331@S:10	2735.06	912.693	2735.06	912.693	0.0024	3	57.5	28.2	Elution from: 70.619 to 70.619 scan no 6562 cid35.00 polarity:+:MA10:m1s	70.619	0	26	K	K
MFAP1_HUMAN	Microfibrillar-associated protein 1 OS=Homo sapiens GN=MFAP1 PE=1 SV=2	RPDYAPMESSDEEDEEFQFIK	2 Phospho (ST)	79.966331@S:9,79.966331@S:10	2721.02	908.015	2721.02	908.015	0.0018	3	52.6	10.9	Elution from: 70.271 to 70.271 scan no 6654 cid35.00 polarity:+:MA10:m1s	70.271	0	26	K	K
MFAP1_HUMAN	Microfibrillar-associated protein 1 OS=Homo sapiens GN=MFAP1 PE=1 SV=2	MEREDSSEEEEEEIDDEEIER	2 Label:13C(6)15N(4) (R);Oxidation (M);2 Phospho (ST)	10.008269@R:3,10.008269@R:21,15.994915@M:1,79.966331@S:6,79.966331@S:7	2821.98	941.668	2821.98	941.667	0.0027	3	24.9	12.5	Elution from: 49.005 to 49.005 scan no 4688 cid35.00 polarity:+:MA10:m1s	49.005	1	26	R	R
MIER1_HUMAN	Mesoderm induction early response protein 1 OS=Homo sapiens GN=MIER1 PE=1 SV=2	YFDTNSEVEEESEEDEDYIPSEDWKK	2 Phospho (ST)	79.966331@S:6,79.966331@S:12	3371.25	1124.76	3371.25	1124.76	0.0024	3	80	14.7	Elution from: 64.878 to 64.878 scan no 6072 cid35.00 polarity:+:MA10:m1s	64.878	1	26	K	E
MIER1_HUMAN	Mesoderm induction early response protein 1 OS=Homo sapiens GN=MIER1 PE=1 SV=2	YFDTNSEVEEESEEDEDYIPSEDWKK	2 Label:2H(4) (K);2 Phospho (ST)	4.025107@K:25,4.025107@K:26,79.966331@S:6,79.966331@S:12	3379.3	1127.44	3379.3	1127.44	0.003	3	57	4.6	Elution from: 65.149 to 65.149 scan no 6078 cid35.00 polarity:+:MA10:m1s	65.149	1	26	K	E
MINT_HUMAN	Msx2-interacting protein OS=Homo sapiens GN=SPEN PE=1 SV=1	HGSFHEDEDPIGSPR	Phospho (ST)	79.966331@S:13	1758.7	587.241	1758.7	587.241	0.0011	3	42.7	34.2	Elution from: 38.623 to 38.623 scan no 3313 cid35.00 polarity:+:MA10	38.623	0	25	R	L
MINT_HUMAN	Msx2-interacting protein OS=Homo sapiens GN=SPEN PE=1 SV=1	DLEPGEVPSDSDEDGEHK	2 Phospho (ST)	79.966331@S:9,79.966331@S:11	2113.74	705.588	2113.74	705.587	0.0026	3	33.1	22	Elution from: 42.416 to 42.416 scan no 3807 cid35.00 polarity:+:MA10:m1s	42.416	0	25	R	S
MINT_HUMAN	Msx2-interacting protein OS=Homo sapiens GN=SPEN PE=1 SV=1	SQSPVHLR	Phospho (ST)	79.966331@S:3	1002.47	502.24	1002.46	502.24	0.0003	2	23.4	8.7	Elution from: 30.121 to 30.121 scan no 2128 cid35.00 polarity:+:MA10	30.121	0	25	R	R
MK01_HUMAN	Mitogen-activated protein kinase 1 OS=Homo sapiens GN=MAPK1 PE=1 SV=3	VADPDHDHTGFLTEYVATR	Label:13C(6)15N(4) (R);Phospho (ST);Phospho (Y)	10.008269@R:19,79.966332@T:13,79.966331@Y:15	2312.94	771.988	2312.94	771.987	0.0029	3	45.7	21.8	Elution from: 54.942 to 54.942 scan no 5200 cid35.00 polarity:+:MA10:m1s	54.942	0	25	R	W
MK67I_HUMAN	MKI67 FHA domain-interacting nucleolar phosphoprotein OS=Homo sapiens GN=MKI67IP PE=1 SV=1	TVDSQGPTPVCTPTFLER	Carbamidomethyl (C);2 Phospho (ST)	57.021465@C:11,79.966332@T:8,79.966332@T:12	2163.9	1082.96	2163.89	1082.95	0.0048	2	70.1	11.2	Elution from: 61.260 to 61.260 scan no 5663 cid35.00 polarity:+:MA10:m1s	61.26	0	25	K	R
MK67I_HUMAN	MKI67 FHA domain-interacting nucleolar phosphoprotein OS=Homo sapiens GN=MKI67IP PE=1 SV=1	TVDSQGPTPVCTPTFLER	Carbamidomethyl (C);Label:13C(6)15N(4) (R);2 Phospho (ST)	57.021465@C:11,10.008269@R:18,79.966332@T:8,79.966332@T:12	2173.91	725.643	2173.9	725.642	0.0024	3	58.5	7.9	Elution from: 61.245 to 61.245 scan no 5768 cid35.00 polarity:+:MA10:m1s	61.245	0	26	K	R
MKX_HUMAN	Homeobox protein Mohawk OS=Homo sapiens GN=MKX PE=2 SV=2	HVMATNTTMMGKTR	2 Phospho (ST)	79.966332@T:5,79.966332@T:7	1737.68	435.427	1737.68	435.427	-0.002	4	29.3	12.3	Elution from: 26.394 to 26.394 scan no 1631 cid35.00 polarity:+:MA10:m1s	26.394	1	26	R	Q
MLL4_HUMAN	Histone-lysine N-methyltransferase MLL4 OS=Homo sapiens GN=WBP7 PE=1 SV=1	TLLPWDSDESPEASPGPPGPR	2 Phospho (ST)	79.966331@S:7,79.966331@S:10	2363.97	788.998	2363.97	788.998	0.0018	3	55.6	22	Elution from: 72.613 to 72.613 scan no 6817 cid35.00 polarity:+:MA10:m1s	72.613	0	26	K	R
MMTA2_HUMAN	Multiple myeloma tumor-associated protein 2 OS=Homo sapiens GN=MMTAG2 PE=1 SV=1	RPAEATSSPTSPERPR	2 Phospho (ST)	79.966332@T:6,79.966331@S:11	1897.81	949.912	1897.81	949.911	0.0014	2	51.6	10	Elution from: 27.205 to 27.205 scan no 1736 cid35.00 polarity:+:MA10:m1s	27.205	0	25	R	H
MMTA2_HUMAN	Multiple myeloma tumor-associated protein 2 OS=Homo sapiens GN=MMTAG2 PE=1 SV=1	RPAEATSSPTSPERPR	2 Phospho (ST)	79.966331@S:8,79.966331@S:11	1897.81	949.913	1897.81	949.911	0.0023	2	37	1.5	Elution from: 27.284 to 27.284 scan no 1801 cid35.00 polarity:+:MA10:m1s	27.284	0	25	R	H
MMTA2_HUMAN	Multiple myeloma tumor-associated protein 2 OS=Homo sapiens GN=MMTAG2 PE=1 SV=1	RPAEATSSPTSPERPR	Phospho (ST)	79.966331@S:11	1817.84	606.955	1817.84	606.955	0	3	34.2	11	Elution from: 26.558 to 26.558 scan no 1647 cid35.00 polarity:+:MA10:m1s	26.558	0	25	R	H
MOCOS_HUMAN	Molybdenum cofactor sulfurase OS=Homo sapiens GN=MOCOS PE=1 SV=2	SLSPQEDALTGSR	Phospho (ST)	79.966331@S:1	1439.63	720.822	1439.63	720.822	0.0009	2	38.9	1.1	Elution from: 46.440 to 46.440 scan no 4212 cid35.00 polarity:+:MA10	46.44	0	25	R	V
MORC2_HUMAN	MORC family CW-type zinc finger protein 2 OS=Homo sapiens GN=MORC2 PE=1 SV=2	DSNELSDSAGEEDSADLK	2 Phospho (ST)	79.966331@S:6,79.966331@S:8	2040.71	1021.36	2040.71	1021.36	0.0014	2	60.9	17	Elution from: 45.160 to 45.160 scan no 4243 cid35.00 polarity:+:MA10:m1s	45.16	0	26	K	R
MORC2_HUMAN	MORC family CW-type zinc finger protein 2 OS=Homo sapiens GN=MORC2 PE=1 SV=2	KDSNELSDSAGEEDSADLK	2 Phospho (ST)	79.966331@S:7,79.966331@S:9	2168.81	723.942	2168.8	723.942	0.0019	3	58.7	21.7	Elution from: 40.820 to 40.820 scan no 3704 cid35.00 polarity:+:MA10:m1s	40.82	1	26	K	R
MORC2_HUMAN	MORC family CW-type zinc finger protein 2 OS=Homo sapiens GN=MORC2 PE=1 SV=2	RSVAVSDEEEVEEEAER	Phospho (ST)	79.966331@S:6	2041.85	681.624	2041.85	681.623	0.0014	3	47.2	1.2	Elution from: 49.891 to 49.891 scan no 4711 cid35.00 polarity:+:MA10:m1s	49.891	1	26	K	R
MORC2_HUMAN	MORC family CW-type zinc finger protein 2 OS=Homo sapiens GN=MORC2 PE=1 SV=2	KDSNELSDSAGEEDSADLK	2 Label:2H(4) (K);2 Phospho (ST)	4.025107@K:1,4.025107@K:19,79.966331@S:7,79.966331@S:9	2176.85	726.625	2176.85	726.625	-0.0001	3	43.5	8.6	Elution from: 41.351 to 41.351 scan no 3614 cid35.00 polarity:+:MA10:m1s	41.351	1	25	K	R
MOT1_HUMAN	Monocarboxylate transporter 1 OS=Homo sapiens GN=SLC16A1 PE=1 SV=3	KESKEEETSIDVAGKPNEVTK	4 Label:2H(4) (K);Phospho (ST)	4.025107@K:1,4.025107@K:4,4.025107@K:15,4.025107@K:21,79.966331@S:3	2413.23	805.418	2413.23	805.418	0.0014	3	64.5	14.3	Elution from: 35.272 to 35.272 scan no 2918 cid35.00 polarity:+:MA10	35.272	2	26	K	A
MOT1_HUMAN	Monocarboxylate transporter 1 OS=Homo sapiens GN=SLC16A1 PE=1 SV=3	ESKEEETSIDVAGKPNEVTK	Phospho (ST)	79.966331@S:8	2269.04	757.354	2269.04	757.353	0.0026	3	60.7	7.8	Elution from: 37.034 to 37.034 scan no 3168 cid35.00 polarity:+:MA10:m1s	37.034	1	26	K	A
MOT1_HUMAN	Monocarboxylate transporter 1 OS=Homo sapiens GN=SLC16A1 PE=1 SV=3	KESKEEETSIDVAGKPNEVTK	Phospho (ST)	79.966331@S:3	2397.13	800.052	2397.13	800.051	0.0017	3	57.3	17.1	Elution from: 35.310 to 35.310 scan no 2960 cid35.00 polarity:+:MA10:m1s	35.31	2	26	K	A
MOT1_HUMAN	Monocarboxylate transporter 1 OS=Homo sapiens GN=SLC16A1 PE=1 SV=3	ESKEEETSIDVAGKPNEVTK	3 Label:2H(4) (K);Phospho (ST)	4.025107@K:3,4.025107@K:14,4.025107@K:20,79.966331@S:8	2281.11	761.378	2281.11	761.378	0.0007	3	54.9	13.9	Elution from: 37.077 to 37.077 scan no 3219 cid35.00 polarity:+:MA10:m1s	37.077	1	26	K	A
MOT1_HUMAN	Monocarboxylate transporter 1 OS=Homo sapiens GN=SLC16A1 PE=1 SV=3	KESKEEETSIDVAGKPNEVTK	4 Label:2H(4) (K);2 Phospho (ST)	4.025107@K:1,4.025107@K:4,4.025107@K:15,4.025107@K:21,79.966331@S:3,79.966331@S:9	2493.2	832.074	2493.2	832.073	0.001	3	53.3	9.8	Elution from: 35.957 to 35.957 scan no 3035 cid35.00 polarity:+:MA10:m1s	35.957	2	26	K	A
MOT1_HUMAN	Monocarboxylate transporter 1 OS=Homo sapiens GN=SLC16A1 PE=1 SV=3	KESKEEETSIDVAGKPNEVTK	Phospho (ST)	79.966332@T:8	2397.13	600.29	2397.13	600.29	0.0002	4	53	1.9	Elution from: 33.897 to 33.897 scan no 2737 cid35.00 polarity:+:MA10:m1s	33.897	2	26	K	A
MOT1_HUMAN	Monocarboxylate transporter 1 OS=Homo sapiens GN=SLC16A1 PE=1 SV=3	KESKEEETSIDVAGKPNEVTK	Phospho (ST)	79.966331@S:9	2397.13	600.29	2397.13	600.29	0.0009	4	44.2	10.2	Elution from: 34.206 to 34.206 scan no 2772 cid35.00 polarity:+:MA10:m1s	34.206	2	26	K	A
MOT1_HUMAN	Monocarboxylate transporter 1 OS=Homo sapiens GN=SLC16A1 PE=1 SV=3	KESKEEETSIDVAGKPNEVTK	2 Phospho (ST)	79.966331@S:3,79.966331@S:9	2477.1	826.707	2477.1	826.706	0.0018	3	42.2	4.7	Elution from: 36.335 to 36.335 scan no 3071 cid35.00 polarity:+:MA10:m1s	36.335	2	26	K	A
MOT1_HUMAN	Monocarboxylate transporter 1 OS=Homo sapiens GN=SLC16A1 PE=1 SV=3	KESKEEETSIDVAGKPNEVTK	4 Label:2H(4) (K);Phospho (ST)	4.025107@K:1,4.025107@K:4,4.025107@K:15,4.025107@K:21,79.966332@T:8	2413.23	805.418	2413.23	805.418	0.0003	3	38	1.5	Elution from: 35.711 to 35.711 scan no 2916 cid35.00 polarity:+:MA10:m1s	35.711	2	25	K	A
MOT1_HUMAN	Monocarboxylate transporter 1 OS=Homo sapiens GN=SLC16A1 PE=1 SV=3	KESKEEETSIDVAGKPNEVTK	2 Phospho (ST)	79.966331@S:3,79.966332@T:8	2477.09	620.28	2477.1	620.282	-0.0051	4	37.1	0.6	Elution from: 35.946 to 35.946 scan no 3033 cid35.00 polarity:+:MA10:m1s	35.946	2	26	K	A
MOT4_HUMAN	Monocarboxylate transporter 4 OS=Homo sapiens GN=SLC16A3 PE=1 SV=1	NGEVVHTPETSV	Phospho (ST)	79.966331@S:11	1347.57	674.793	1347.57	674.793	0.0008	2	68	17.5	Elution from: 41.168 to 41.168 scan no 3734 cid35.00 polarity:+:MA10	41.168	0	26	K	-
MOT4_HUMAN	Monocarboxylate transporter 4 OS=Homo sapiens GN=SLC16A3 PE=1 SV=1	NGEVVHTPETSV	2 Phospho (ST)	79.966332@T:7,79.966331@S:11	1427.54	714.776	1427.54	714.776	0.0012	2	47.6	14.2	Elution from: 40.743 to 40.743 scan no 3675 cid35.00 polarity:+:MA10	40.743	0	26	K	-
MPP10_HUMAN	U3 small nucleolar ribonucleoprotein protein MPP10 OS=Homo sapiens GN=MPHOSPH10 PE=1 SV=2	SDLRKSPVFSDEDSDLDFDISK	3 Phospho (ST)	79.966331@S:6,79.966331@S:10,79.966331@S:14	2754.08	919.034	2754.08	919.032	0.0057	3	61.4	2.3	Elution from: 65.998 to 65.998 scan no 6147 cid35.00 polarity:+:MA10:m1s	65.998	2	25	K	L
MPP10_HUMAN	U3 small nucleolar ribonucleoprotein protein MPP10 OS=Homo sapiens GN=MPHOSPH10 PE=1 SV=2	SDLRKSPVFSDEDSDLDFDISK	Label:13C(6)15N(4) (R);2 Label:2H(4) (K);3 Phospho (ST)	10.008269@R:4,4.025107@K:5,4.025107@K:22,79.966331@S:6,79.966331@S:10,79.966331@S:14	2772.13	925.052	2772.13	925.052	0.0011	3	55.4	4.8	Elution from: 65.001 to 65.001 scan no 6074 cid35.00 polarity:+:MA10:m1s	65.001	2	26	K	L
MPP10_HUMAN	U3 small nucleolar ribonucleoprotein protein MPP10 OS=Homo sapiens GN=MPHOSPH10 PE=1 SV=2	SPVFSDEDSDLDFDISK	2 Phospho (ST)	79.966331@S:5,79.966331@S:9	2074.77	1038.39	2074.77	1038.39	0.004	2	53.9	16.4	Elution from: 73.158 to 73.158 scan no 6826 cid35.00 polarity:+:MA10:m1s	73.158	0	25	K	L
MPP10_HUMAN	U3 small nucleolar ribonucleoprotein protein MPP10 OS=Homo sapiens GN=MPHOSPH10 PE=1 SV=2	SDLRKSPVFSDEDSDLDFDISK	Label:13C(6)15N(4) (R);2 Label:2H(4) (K);3 Phospho (ST)	10.008269@R:4,4.025107@K:5,4.025107@K:22,79.966331@S:1,79.966331@S:10,79.966331@S:14	2772.14	925.053	2772.13	925.052	0.0039	3	46.4	2.4	Elution from: 65.333 to 65.333 scan no 6206 cid35.00 polarity:+:MA10:m1s	65.333	2	26	K	L
MPP10_HUMAN	U3 small nucleolar ribonucleoprotein protein MPP10 OS=Homo sapiens GN=MPHOSPH10 PE=1 SV=2	SPVFSDEDSDLDFDISK	Label:2H(4) (K);2 Phospho (ST)	4.025107@K:17,79.966331@S:5,79.966331@S:9	2078.8	1040.41	2078.79	1040.4	0.0027	2	43.5	14.1	Elution from: 73.125 to 73.125 scan no 6639 cid35.00 polarity:+:MA10:m1s	73.125	0	25	K	L
MPP8_HUMAN	M-phase phosphoprotein 8 OS=Homo sapiens GN=MPHOSPH8 PE=1 SV=2	GAEAFGDSEEDGEDVFEVEK	Phospho (ST)	79.966331@S:8	2237.86	1119.93	2237.85	1119.93	0.003	2	103.5	98.3	Elution from: 64.094 to 64.094 scan no 6019 cid35.00 polarity:+:MA10:m1s	64.094	0	26	R	I
MPP8_HUMAN	M-phase phosphoprotein 8 OS=Homo sapiens GN=MPHOSPH8 PE=1 SV=2	GAEAFGDSEEDGEDVFEVEK	Label:2H(4) (K);Phospho (ST)	4.025107@K:20,79.966331@S:8	2241.88	1121.95	2241.88	1121.95	0.0034	2	99.2	92.5	Elution from: 64.282 to 64.282 scan no 6004 cid35.00 polarity:+:MA10:m1s	64.282	0	25	R	I
MPP8_HUMAN	M-phase phosphoprotein 8 OS=Homo sapiens GN=MPHOSPH8 PE=1 SV=2	GYTSDDDTWEPEIHLEDCK	Carbamidomethyl (C);Phospho (ST)	57.021465@C:18,79.966331@S:4	2388.91	797.311	2388.91	797.31	0.0028	3	54.9	13.4	Elution from: 63.319 to 63.319 scan no 5953 cid35.00 polarity:+:MA10:m1s	63.319	0	26	K	E
MPP8_HUMAN	M-phase phosphoprotein 8 OS=Homo sapiens GN=MPHOSPH8 PE=1 SV=2	GYTSDDDTWEPEIHLEDCK	Carbamidomethyl (C);Label:2H(4) (K);Phospho (ST)	57.021465@C:18,4.025107@K:19,79.966331@S:4	2392.94	798.653	2392.93	798.652	0.0025	3	52.4	2.9	Elution from: 63.427 to 63.427 scan no 5907 cid35.00 polarity:+:MA10:m1s	63.427	0	25	K	E
MPP8_HUMAN	M-phase phosphoprotein 8 OS=Homo sapiens GN=MPHOSPH8 PE=1 SV=2	GLWSTDSAEEDK	Label:2H(4) (K);Phospho (ST)	4.025107@K:12,79.966331@S:7	1420.57	711.293	1420.57	711.292	0.0018	2	39.7	11.1	Elution from: 50.165 to 50.165 scan no 4674 cid35.00 polarity:+:MA10	50.165	0	26	R	E
MPRI_HUMAN	Cation-independent mannose-6-phosphate receptor OS=Homo sapiens GN=IGF2R PE=1 SV=3	LVSFHDDSDEDLLHI	Phospho (ST)	79.966331@S:8	1833.78	917.899	1833.78	917.898	0.0017	2	66.2	32.9	Elution from: 69.515 to 69.515 scan no 6581 cid35.00 polarity:+:MA10	69.515	0	26	K	-
MPRI_HUMAN	Cation-independent mannose-6-phosphate receptor OS=Homo sapiens GN=IGF2R PE=1 SV=3	LVSFHDDSDEDLLHI	2 Phospho (ST)	79.966331@S:3,79.966331@S:8	1913.75	957.883	1913.75	957.882	0.003	2	64.9	56.7	Elution from: 75.671 to 75.671 scan no 6917 cid35.00 polarity:+:MA10:m1s	75.671	0	26	K	-
MPRI_HUMAN	Cation-independent mannose-6-phosphate receptor OS=Homo sapiens GN=IGF2R PE=1 SV=3	ALSSLHGDDQDSEDEVLTIPEVK	Phospho (ST)	79.966331@S:12	2576.16	859.726	2576.15	859.725	0.0032	3	55.5	26.4	Elution from: 62.523 to 62.523 scan no 5881 cid35.00 polarity:+:MA10:m1s	62.523	0	26	K	V
MPRI_HUMAN	Cation-independent mannose-6-phosphate receptor OS=Homo sapiens GN=IGF2R PE=1 SV=3	ALSSLHGDDQDSEDEVLTIPEVK	Label:2H(4) (K);Phospho (ST)	4.025107@K:23,79.966331@S:12	2580.18	861.067	2580.18	861.067	0.0026	3	43.9	17.1	Elution from: 62.420 to 62.420 scan no 5765 cid35.00 polarity:+:MA10:m1s	62.42	0	25	K	V
MPRI_HUMAN	Cation-independent mannose-6-phosphate receptor OS=Homo sapiens GN=IGF2R PE=1 SV=3	LVSFHDDSDEDLLHI	Phospho (ST)	79.966331@S:3	1833.78	612.268	1833.78	612.268	0.0005	3	29.5	2.7	Elution from: 69.770 to 69.770 scan no 6410 cid35.00 polarity:+:MA10:m1s	69.77	0	26	K	-
MPZL1_HUMAN	Myelin protein zero-like protein 1 OS=Homo sapiens GN=MPZL1 PE=1 SV=1	DYTGCSTSESLSPVK	Carbamidomethyl (C);Phospho (ST)	57.021465@C:5,79.966331@S:12	1709.69	855.85	1709.69	855.85	-0.0003	2	79.3	30.1	Elution from: 43.539 to 43.539 scan no 4030 cid35.00 polarity:+:MA10:m1s	43.539	0	26	R	Q
MPZL1_HUMAN	Myelin protein zero-like protein 1 OS=Homo sapiens GN=MPZL1 PE=1 SV=1	SESVVYADIR	Phospho (Y)	79.966331@Y:6	1217.53	609.774	1217.53	609.774	0.0008	2	55.5	25.5	Elution from: 44.630 to 44.630 scan no 4161 cid35.00 polarity:+:MA10	44.63	0	26	K	K
MPZL1_HUMAN	Myelin protein zero-like protein 1 OS=Homo sapiens GN=MPZL1 PE=1 SV=1	SESVVYADIR	Label:13C(6)15N(4) (R);Phospho (Y)	10.008269@R:10,79.966331@Y:6	1227.54	614.777	1227.54	614.778	-0.0011	2	50.8	26.7	Elution from: 45.158 to 45.158 scan no 4105 cid35.00 polarity:+:MA10	45.158	0	26	K	K
MPZL2_HUMAN	Myelin protein zero-like protein 2 OS=Homo sapiens GN=MPZL2 PE=1 SV=1	KVSVYLEDTD	Label:2H(4) (K);Phospho (ST)	4.025107@K:1,79.966331@S:3	1251.56	626.786	1251.56	626.786	0.0002	2	37.5	9.7	Elution from: 49.783 to 49.783 scan no 4696 cid35.00 polarity:+:MA10	49.783	1	25	K	-
MRCKA_HUMAN	Serine/threonine-protein kinase MRCK alpha OS=Homo sapiens GN=CDC42BPA PE=1 SV=1	SPSCTPASKGR	Carbamidomethyl (C);Label:13C(6)15N(4) (R);Phospho (ST)	57.021465@C:4,10.008269@R:11,79.966331@S:3	1236.52	413.18	1236.52	413.181	-0.0027	3	25.4	13	Elution from: 35.493 to 35.493 scan no 2964 cid35.00 polarity:+:MA10	35.493	1	25	R	R
MRE11_HUMAN	Double-strand break repair protein MRE11A OS=Homo sapiens GN=MRE11A PE=1 SV=3	GVDFESSEDDDDDPFMNTSSLRR	Oxidation (M);2 Phospho (ST)	15.994915@M:16,79.966331@S:6,79.966331@S:7	2809.01	937.345	2809.01	937.344	0.0022	3	83.4	67.3	Elution from: 62.565 to 62.565 scan no 5886 cid35.00 polarity:+:MA10:m1s	62.565	1	26	K	N
MRE11_HUMAN	Double-strand break repair protein MRE11A OS=Homo sapiens GN=MRE11A PE=1 SV=3	GVDFESSEDDDDDPFMNTSSLRR	2 Label:13C(6)15N(4) (R);Oxidation (M);2 Phospho (ST)	10.008269@R:22,10.008269@R:23,15.994915@M:16,79.966331@S:6,79.966331@S:7	2829.03	944.017	2829.03	944.016	0.0024	3	66.3	58.9	Elution from: 62.850 to 62.850 scan no 5856 cid35.00 polarity:+:MA10:m1s	62.85	1	25	K	N
MRE11_HUMAN	Double-strand break repair protein MRE11A OS=Homo sapiens GN=MRE11A PE=1 SV=3	GVDFESSEDDDDDPFMNTSSLRR	2 Phospho (ST)	79.966331@S:6,79.966331@S:7	2793.02	932.014	2793.01	932.012	0.0048	3	62.1	54.1	Elution from: 67.927 to 67.927 scan no 6310 cid35.00 polarity:+:MA10:m1s	67.927	1	26	K	N
MRE11_HUMAN	Double-strand break repair protein MRE11A OS=Homo sapiens GN=MRE11A PE=1 SV=3	GVDFESSEDDDDDPFMNTSSLR	2 Phospho (ST)	79.966331@S:6,79.966331@S:7	2636.92	1319.46	2636.91	1319.46	0.0014	2	53.7	52.7	Elution from: 75.113 to 75.113 scan no 7003 cid35.00 polarity:+:MA10:m1s	75.113	0	26	K	R
MRE11_HUMAN	Double-strand break repair protein MRE11A OS=Homo sapiens GN=MRE11A PE=1 SV=3	GVDFESSEDDDDDPFMNTSSLR	Label:13C(6)15N(4) (R);Oxidation (M);2 Phospho (ST)	10.008269@R:22,15.994915@M:16,79.966331@S:6,79.966331@S:7	2662.92	1332.47	2662.92	1332.47	0.0018	2	51.8	48	Elution from: 69.264 to 69.264 scan no 6358 cid35.00 polarity:+:MA10:m1s	69.264	0	26	K	R
MRE11_HUMAN	Double-strand break repair protein MRE11A OS=Homo sapiens GN=MRE11A PE=1 SV=3	GVDFESSEDDDDDPFMNTSSLR	Oxidation (M);2 Phospho (ST)	15.994915@M:16,79.966331@S:6,79.966331@S:7	2652.91	885.311	2652.91	885.31	0.0027	3	49.4	46.7	Elution from: 69.300 to 69.300 scan no 6433 cid35.00 polarity:+:MA10:m1s	69.3	0	26	K	R
MRGBP_HUMAN	MRG-binding protein OS=Homo sapiens GN=MRGBP PE=1 SV=1	VLTANSNPSSPSAAK	Phospho (ST)	79.966331@S:9	1522.7	762.359	1522.7	762.359	0.0004	2	49.4	0.1	Elution from: 31.488 to 31.488 scan no 2389 cid35.00 polarity:+:MA10	31.488	0	26	K	R
MRGBP_HUMAN	MRG-binding protein OS=Homo sapiens GN=MRGBP PE=1 SV=1	VLTANSNPSSPSAAK	Phospho (ST)	79.966331@S:10	1522.7	762.359	1522.7	762.359	0.0001	2	41.6	0.6	Elution from: 31.561 to 31.561 scan no 2421 cid35.00 polarity:+:MA10	31.561	0	26	K	R
MRP_HUMAN	MARCKS-related protein OS=Homo sapiens GN=MARCKSL1 PE=1 SV=2	GDVTAEEAAGASPAK	Phospho (ST)	79.966331@S:12	1452.61	727.314	1452.61	727.314	0.0008	2	105.6	82.1	Elution from: 31.974 to 31.974 scan no 2481 cid35.00 polarity:+:MA10	31.974	0	26	R	A
MRP_HUMAN	MARCKS-related protein OS=Homo sapiens GN=MARCKSL1 PE=1 SV=2	GDVTAEEAAGASPAK	Label:2H(4) (K);Phospho (ST)	4.025107@K:15,79.966331@S:12	1456.64	729.327	1456.64	729.326	0.0012	2	92	54.7	Elution from: 31.980 to 31.980 scan no 2392 cid35.00 polarity:+:MA10	31.98	0	25	R	A
MRP_HUMAN	MARCKS-related protein OS=Homo sapiens GN=MARCKSL1 PE=1 SV=2	LSGLSFKR	Label:13C(6)15N(4) (R);Label:2H(4) (K);Phospho (ST)	10.008269@R:8,4.025107@K:7,79.966331@S:5	1000.53	501.272	1000.53	501.271	0.0003	2	48.5	25.9	Elution from: 45.205 to 45.205 scan no 4249 cid35.00 polarity:+:MA10	45.205	1	26	K	N
MRP_HUMAN	MARCKS-related protein OS=Homo sapiens GN=MARCKSL1 PE=1 SV=2	LSGLSFKR	Phospho (ST)	79.966331@S:5	986.495	494.255	986.495	494.255	-0.0004	2	42	24.2	Elution from: 45.243 to 45.243 scan no 4072 cid35.00 polarity:+:MA10	45.243	1	25	K	N
MRP_HUMAN	MARCKS-related protein OS=Homo sapiens GN=MARCKSL1 PE=1 SV=2	LSGLSFK	Label:2H(4) (K);Phospho (ST)	4.025107@K:7,79.966331@S:5	834.419	418.217	834.419	418.217	-0.0002	2	31.6	16.2	Elution from: 53.313 to 53.313 scan no 4984 cid35.00 polarity:+:MA10	53.313	0	25	K	R
MRP_HUMAN	MARCKS-related protein OS=Homo sapiens GN=MARCKSL1 PE=1 SV=2	LSGLSFK	Phospho (ST)	79.966331@S:5	830.394	416.204	830.394	416.204	0	2	27.6	5.8	Elution from: 53.191 to 53.191 scan no 4965 cid35.00 polarity:+:MA10	53.191	0	25	K	R
MRP_HUMAN	MARCKS-related protein OS=Homo sapiens GN=MARCKSL1 PE=1 SV=2	KFSFK	Phospho (ST)	79.966331@S:3	735.336	368.675	735.336	368.675	0	2	24.4	5.6	Elution from: 37.815 to 37.815 scan no 3163 cid35.00 polarity:+:MA10	37.815	1	26	K	K
MRP4_HUMAN	Multidrug resistance-associated protein 4 OS=Homo sapiens GN=ABCC4 PE=1 SV=3	DNEESEQPPVPGTPTLR	Label:13C(6)15N(4) (R);Phospho (ST)	10.008269@R:17,79.966332@T:13	1954.86	978.435	1954.85	978.435	0.0009	2	72.6	15.6	Elution from: 48.083 to 48.083 scan no 4444 cid35.00 polarity:+:MA10:m1s	48.083	0	26	K	N
MRP4_HUMAN	Multidrug resistance-associated protein 4 OS=Homo sapiens GN=ABCC4 PE=1 SV=3	DNEESEQPPVPGTPTLR	Phospho (ST)	79.966332@T:13	1944.85	973.432	1944.85	973.431	0.0027	2	61.7	7.6	Elution from: 47.972 to 47.972 scan no 4497 cid35.00 polarity:+:MA10:m1s	47.972	0	26	K	N
MTMR2_HUMAN	Myotubularin-related protein 2 OS=Homo sapiens GN=MTMR2 PE=1 SV=4	ASSPAQCVTPVQTVV	Carbamidomethyl (C);Phospho (ST)	57.021465@C:7,79.966331@S:3	1622.74	812.377	1622.74	812.376	0.0025	2	45.1	0	Elution from: 56.202 to 56.202 scan no 5273 cid35.00 polarity:+:MA10:m1s	56.202	0	26	R	-
MTMR8_HUMAN	Myotubularin-related protein 8 OS=Homo sapiens GN=MTMR8 PE=1 SV=1	GFSGDMGILGDTGISKASTK	Oxidation (M);2 Phospho (ST)	15.994915@M:6,79.966331@S:15,79.966332@T:19	2116.87	706.632	2116.88	706.634	-0.0044	3	29.1	0	Elution from: 34.872 to 34.872 scan no 2742 cid35.00 polarity:+:MA10:m1s	34.872	1	26	R	E
MTMRA_HUMAN	Myotubularin-related protein 10 OS=Homo sapiens GN=MTMR10 PE=1 SV=3	IWLSTETLANED	Phospho (ST)	79.966332@T:5	1470.63	736.322	1470.63	736.321	0.0017	2	38.7	0	Elution from: 71.311 to 71.311 scan no 6724 cid35.00 polarity:+:MA10	71.311	0	26	K	-
MTMRA_HUMAN	Myotubularin-related protein 10 OS=Homo sapiens GN=MTMR10 PE=1 SV=3	IWLSTETLANED	Phospho (ST)	79.966331@S:4	1470.63	736.322	1470.63	736.321	0.0016	2	28.4	1.6	Elution from: 71.907 to 71.907 scan no 6655 cid35.00 polarity:+:MA10	71.907	0	26	K	-
MTRR_HUMAN	Methionine synthase reductase OS=Homo sapiens GN=MTRR PE=1 SV=3	SSRGQEEISGALPVASPASSR	Phospho (ST)	79.966331@S:9	2165.01	722.678	2165.01	722.678	0.0012	3	50.3	22.3	Elution from: 48.336 to 48.336 scan no 4437 cid35.00 polarity:+:MA10	48.336	1	26	R	T
MY18A_HUMAN	Unconventional myosin-XVIIIa OS=Homo sapiens GN=MYO18A PE=1 SV=3	YSHSYLSDSDTEAK	Label:2H(4) (K);2 Phospho (ST)	4.025107@K:14,79.966331@S:7,79.966331@S:9	1765.64	883.828	1765.64	883.828	0.0001	2	53.9	10.9	Elution from: 41.567 to 41.567 scan no 3790 cid35.00 polarity:+:MA10	41.567	0	25	R	L
MY18A_HUMAN	Unconventional myosin-XVIIIa OS=Homo sapiens GN=MYO18A PE=1 SV=3	YSHSYLSDSDTEAK	Label:2H(4) (K);Phospho (ST);Phospho (Y)	4.025107@K:14,79.966331@S:9,79.966331@Y:5	1765.64	883.829	1765.64	883.828	0.0014	2	47.4	9.3	Elution from: 41.306 to 41.306 scan no 3608 cid35.00 polarity:+:MA10	41.306	0	25	R	L
MY18A_HUMAN	Unconventional myosin-XVIIIa OS=Homo sapiens GN=MYO18A PE=1 SV=3	NKLEGDSDVDSELEDRVDGVK	2 Phospho (ST)	79.966331@S:7,79.966331@S:11	2478.02	827.015	2478.02	827.014	0.0019	3	36.9	26.5	Elution from: 57.224 to 57.224 scan no 5342 cid35.00 polarity:+:MA10:m1s	57.224	2	25	K	S
MY18A_HUMAN	Unconventional myosin-XVIIIa OS=Homo sapiens GN=MYO18A PE=1 SV=3	YSHSYLSDSDTEAK	Label:2H(4) (K);Phospho (ST);Phospho (Y)	4.025107@K:14,79.966331@S:9,79.966331@Y:1	1765.64	589.555	1765.64	589.555	0	3	35.8	0.2	Elution from: 41.561 to 41.561 scan no 3789 cid35.00 polarity:+:MA10	41.561	0	25	R	L
MY18A_HUMAN	Unconventional myosin-XVIIIa OS=Homo sapiens GN=MYO18A PE=1 SV=3	SSSPTSYWK	Label:2H(4) (K);Phospho (ST)	4.025107@K:9,79.966331@S:3	1125.47	563.741	1125.47	563.741	0.0003	2	31.9	12	Elution from: 47.203 to 47.203 scan no 4483 cid35.00 polarity:+:MA10	47.203	0	26	K	S
MY18A_HUMAN	Unconventional myosin-XVIIIa OS=Homo sapiens GN=MYO18A PE=1 SV=3	STSFRQGPEESGLGDGTGPK	Label:13C(6)15N(4) (R);Label:2H(4) (K);Phospho (ST)	10.008269@R:5,4.025107@K:20,79.966331@S:3	2099.94	700.986	2099.93	700.985	0.002	3	31.7	4.6	Elution from: 41.688 to 41.688 scan no 3820 cid35.00 polarity:+:MA10:m1s	41.688	1	26	R	L
MY18A_HUMAN	Unconventional myosin-XVIIIa OS=Homo sapiens GN=MYO18A PE=1 SV=3	RFSFSQR	2 Label:13C(6)15N(4) (R);Phospho (ST)	10.008269@R:1,10.008269@R:7,79.966331@S:3	1026.46	514.235	1026.46	514.235	0.0001	2	28.5	7.5	Elution from: 40.407 to 40.407 scan no 3532 cid35.00 polarity:+:MA10	40.407	1	26	K	S
MY18A_HUMAN	Unconventional myosin-XVIIIa OS=Homo sapiens GN=MYO18A PE=1 SV=3	YSHSYLSDSDTEAK	Label:2H(4) (K);Phospho (ST);Phospho (Y)	4.025107@K:14,79.966331@S:7,79.966331@Y:1	1765.64	589.555	1765.64	589.555	0.0011	3	24.4	0.7	Elution from: 41.478 to 41.478 scan no 3709 cid35.00 polarity:+:MA10	41.478	0	25	R	L
MYCT_HUMAN	Proton myo-inositol cotransporter OS=Homo sapiens GN=SLC2A13 PE=1 SV=3	GSNYHLSDNDASDVE	2 Phospho (ST)	79.966331@S:7,79.966331@S:12	1781.58	891.798	1781.58	891.798	0.0004	2	37.7	3.2	Elution from: 45.922 to 45.922 scan no 4281 cid35.00 polarity:+:MA10	45.922	0	26	K	-
MYH10_HUMAN	Myosin-10 OS=Homo sapiens GN=MYH10 PE=1 SV=3	QLHLEGASLELSDDDTESK	Phospho (ST)	79.966331@S:12	2165.94	722.987	2165.94	722.986	0.0027	3	61.2	29.2	Elution from: 59.366 to 59.366 scan no 5518 cid35.00 polarity:+:MA10:m1s	59.366	0	25	R	T
MYH10_HUMAN	Myosin-10 OS=Homo sapiens GN=MYH10 PE=1 SV=3	QLHLEGASLELSDDDTESK	Label:2H(4) (K);Phospho (ST)	4.025107@K:19,79.966331@S:12	2169.96	724.329	2169.96	724.328	0.0024	3	54.1	16.8	Elution from: 59.182 to 59.182 scan no 5548 cid35.00 polarity:+:MA10:m1s	59.182	0	26	R	T
MYH9_HUMAN	Myosin-9 OS=Homo sapiens GN=MYH9 PE=1 SV=4	GAGDGSDEEVDGKADGAEAKPAE	Phospho (ST)	79.966331@S:6	2253.89	1127.95	2253.89	1127.95	0.0029	2	114.7	104.9	Elution from: 32.531 to 32.531 scan no 2543 cid35.00 polarity:+:MA10:m1s	32.531	1	26	K	-
MYH9_HUMAN	Myosin-9 OS=Homo sapiens GN=MYH9 PE=1 SV=4	GAGDGSDEEVDGKADGAEAKPAE	2 Label:2H(4) (K);Phospho (ST)	4.025107@K:13,4.025107@K:20,79.966331@S:6	2261.94	1131.98	2261.94	1131.98	0.0024	2	101.7	94.9	Elution from: 33.003 to 33.003 scan no 2608 cid35.00 polarity:+:MA10:m1s	33.003	1	25	K	-
MYH9_HUMAN	Myosin-9 OS=Homo sapiens GN=MYH9 PE=1 SV=4	KGAGDGSDEEVDGKADGAEAKPAE	Phospho (ST)	79.966331@S:7	2381.99	795.003	2381.99	795.003	0.002	3	71.5	62.7	Elution from: 30.190 to 30.190 scan no 2117 cid35.00 polarity:+:MA10:m1s	30.19	2	25	R	-
MYH9_HUMAN	Myosin-9 OS=Homo sapiens GN=MYH9 PE=1 SV=4	KGAGDGSDEEVDGKADGAEAKPAE	3 Label:2H(4) (K);Phospho (ST)	4.025107@K:1,4.025107@K:14,4.025107@K:21,79.966331@S:7	2394.06	799.028	2394.06	799.028	0.001	3	55.9	46.8	Elution from: 30.041 to 30.041 scan no 2216 cid35.00 polarity:+:MA10:m1s	30.041	2	26	R	-
MYOF_HUMAN	Myoferlin OS=Homo sapiens GN=MYOF PE=1 SV=1	HTIIPAKSPEK	Phospho (ST)	79.966331@S:8	1299.66	434.227	1299.66	434.227	-0.0007	3	27.1	18.6	Elution from: 28.713 to 28.713 scan no 1999 cid35.00 polarity:+:MA10	28.713	1	26	R	C
MYPN_HUMAN	Myopalladin OS=Homo sapiens GN=MYPN PE=1 SV=2	TPVDESDDEIQHDEIPTGK	Phospho (ST)	79.966331@S:6	2203.92	735.646	2203.92	735.646	0.0019	3	49.1	24.9	Elution from: 46.142 to 46.142 scan no 4188 cid35.00 polarity:+:MA10:m1s	46.142	0	26	R	C
MYPT1_HUMAN	Protein phosphatase 1 regulatory subunit 12A OS=Homo sapiens GN=PPP1R12A PE=1 SV=1	STGVSFWTQDSDENEQEQQSDTEEGSNKK	Phospho (ST)	79.966331@S:20	3369.35	1124.12	3369.34	1124.12	0.0026	3	57.5	8.1	Elution from: 53.637 to 53.637 scan no 5166 cid35.00 polarity:+:MA10:m1s	53.637	1	26	R	E
MYPT1_HUMAN	Protein phosphatase 1 regulatory subunit 12A OS=Homo sapiens GN=PPP1R12A PE=1 SV=1	STGVSFWTQDSDENEQEQQSDTEEGSNKK	2 Label:2H(4) (K);Phospho (ST)	4.025107@K:28,4.025107@K:29,79.966331@S:20	3377.4	1126.81	3377.39	1126.81	0.0053	3	43	12	Elution from: 53.547 to 53.547 scan no 5107 cid35.00 polarity:+:MA10:m1s	53.547	1	25	R	E
NAA15_HUMAN	N-alpha-acetyltransferase 15, NatA auxiliary subunit OS=Homo sapiens GN=NAA15 PE=1 SV=1	ITVNGDSSAEAEELANEI	Phospho (ST)	79.966331@S:8	1940.83	971.42	1940.83	971.42	0.0013	2	72	6.3	Elution from: 70.178 to 70.178 scan no 6644 cid35.00 polarity:+:MA10:m1s	70.178	0	26	K	-
NAA15_HUMAN	N-alpha-acetyltransferase 15, NatA auxiliary subunit OS=Homo sapiens GN=NAA15 PE=1 SV=1	ITVNGDSSAEAEELANEI	Phospho (ST)	79.966331@S:7	1940.83	971.421	1940.83	971.42	0.0026	2	65.1	2	Elution from: 70.440 to 70.440 scan no 6542 cid35.00 polarity:+:MA10:m1s	70.44	0	26	K	-
NAA15_HUMAN	N-alpha-acetyltransferase 15, NatA auxiliary subunit OS=Homo sapiens GN=NAA15 PE=1 SV=1	ITVNGDSSAEAEELANEI	2 Phospho (ST)	79.966332@T:2,79.966331@S:8	2020.79	1011.4	2020.79	1011.4	0.0026	2	43.9	1.2	Elution from: 75.915 to 75.915 scan no 6960 cid35.00 polarity:+:MA10:m1s	75.915	0	26	K	-
NAA15_HUMAN	N-alpha-acetyltransferase 15, NatA auxiliary subunit OS=Homo sapiens GN=NAA15 PE=1 SV=1	ITVNGDSSAEAEELANEI	2 Phospho (ST)	79.966331@S:7,79.966331@S:8	2020.8	1011.4	2020.79	1011.4	0.0039	2	40.6	6.8	Elution from: 75.898 to 75.898 scan no 6886 cid35.00 polarity:+:MA10:m1s	75.898	0	26	K	-
NADAP_HUMAN	Kanadaptin OS=Homo sapiens GN=SLC4A1AP PE=1 SV=1	NWEDEDFYDSDDDTFLDR	Phospho (ST)	79.966331@S:10	2375.84	1188.93	2375.84	1188.93	0.0029	2	89.9	21	Elution from: 75.717 to 75.717 scan no 6923 cid35.00 polarity:+:MA10:m1s	75.717	0	25	K	T
NADAP_HUMAN	Kanadaptin OS=Homo sapiens GN=SLC4A1AP PE=1 SV=1	NWEDEDFYDSDDDTFLDR	Label:13C(6)15N(4) (R);Phospho (ST)	10.008269@R:18,79.966331@S:10	2385.85	1193.93	2385.85	1193.93	0.0033	2	75	26.3	Elution from: 75.746 to 75.746 scan no 6945 cid35.00 polarity:+:MA10:m1s	75.746	0	26	K	T
NAF1_HUMAN	H/ACA ribonucleoprotein complex non-core subunit NAF1 OS=Homo sapiens GN=NAF1 PE=1 SV=2	NDQEPPPEALDFSDDEK	Phospho (ST)	79.966331@S:13	2024.79	1013.4	2024.79	1013.4	0.002	2	87.1	78.4	Elution from: 55.290 to 55.290 scan no 5132 cid35.00 polarity:+:MA10:m1s	55.29	0	26	K	E
NAV1_HUMAN	Neuron navigator 1 OS=Homo sapiens GN=NAV1 PE=1 SV=2	SLTNLSFLTDSEK	Phospho (ST)	79.966331@S:1	1533.7	767.857	1533.7	767.855	0.0024	2	66.7	11.7	Elution from: 70.678 to 70.678 scan no 6492 cid35.00 polarity:+:MA10	70.678	0	26	K	K
NCBP1_HUMAN	Nuclear cap-binding protein subunit 1 OS=Homo sapiens GN=NCBP1 PE=1 SV=1	KTSDANETEDHLESLICK	Carbamidomethyl (C);2 Label:2H(4) (K);Phospho (ST)	57.021465@C:17,4.025107@K:1,4.025107@K:18,79.966331@S:3	2176.98	726.668	2176.98	726.667	0.0015	3	48.4	6.4	Elution from: 56.793 to 56.793 scan no 5327 cid35.00 polarity:+:MA10:m1s	56.793	1	26	R	V
NCBP1_HUMAN	Nuclear cap-binding protein subunit 1 OS=Homo sapiens GN=NCBP1 PE=1 SV=1	TSDANETEDHLESLICK	Carbamidomethyl (C);Label:2H(4) (K);Phospho (ST)	57.021465@C:16,4.025107@K:17,79.966331@S:2	2044.86	682.628	2044.86	682.627	0.0014	3	43.4	11.4	Elution from: 61.259 to 61.259 scan no 5811 cid35.00 polarity:+:MA10:m1s	61.259	0	25	K	V
NCOAT_HUMAN	Bifunctional protein NCOAT OS=Homo sapiens GN=MGEA5 PE=1 SV=2	LENEGSDEDIETDVLYSPQMALK	Phospho (ST)	79.966331@S:6	2675.16	892.727	2675.16	892.726	0.0031	3	56.9	6.7	Elution from: 73.337 to 73.337 scan no 6696 cid35.00 polarity:+:MA10:m1s	73.337	0	26	K	L
NCOR2_HUMAN	Nuclear receptor corepressor 2 OS=Homo sapiens GN=NCOR2 PE=1 SV=2	SPGNTSQPPAFFSK	Phospho (ST)	79.966331@S:1	1543.67	772.843	1543.67	772.843	0.0008	2	58.4	26.4	Elution from: 53.374 to 53.374 scan no 5022 cid35.00 polarity:+:MA10	53.374	0	26	K	L
NCOR2_HUMAN	Nuclear receptor corepressor 2 OS=Homo sapiens GN=NCOR2 PE=1 SV=2	SPGNTSQPPAFFSK	Label:2H(4) (K);Phospho (ST)	4.025107@K:14,79.966331@S:1	1547.7	774.856	1547.7	774.855	0.0021	2	40.4	17.8	Elution from: 53.166 to 53.166 scan no 5070 cid35.00 polarity:+:MA10	53.166	0	25	K	L
NCOR2_HUMAN	Nuclear receptor corepressor 2 OS=Homo sapiens GN=NCOR2 PE=1 SV=2	ANASPQKPLDLK	Phospho (ST)	79.966331@S:4	1360.67	454.565	1360.68	454.566	-0.0004	3	29.4	17.9	Elution from: 36.921 to 36.921 scan no 3195 cid35.00 polarity:+:MA10	36.921	0	26	R	Q
[truncated: 1,499 more rows]
